# Supplementary material for: Dendritic cell immunotherapy followed by cART interruption during HIV-1 infection induces plasma protein markers of cellular immunity and neutrophil recruitment
Source: PubMed Central journal article supplement (PMC5794189; doi:10.1371/journal.pone.0192278), 2018-02-01
Supplement: pone.0192278.s008.pdf [file pone.0192278.s008.pdf]

# 6Ckine

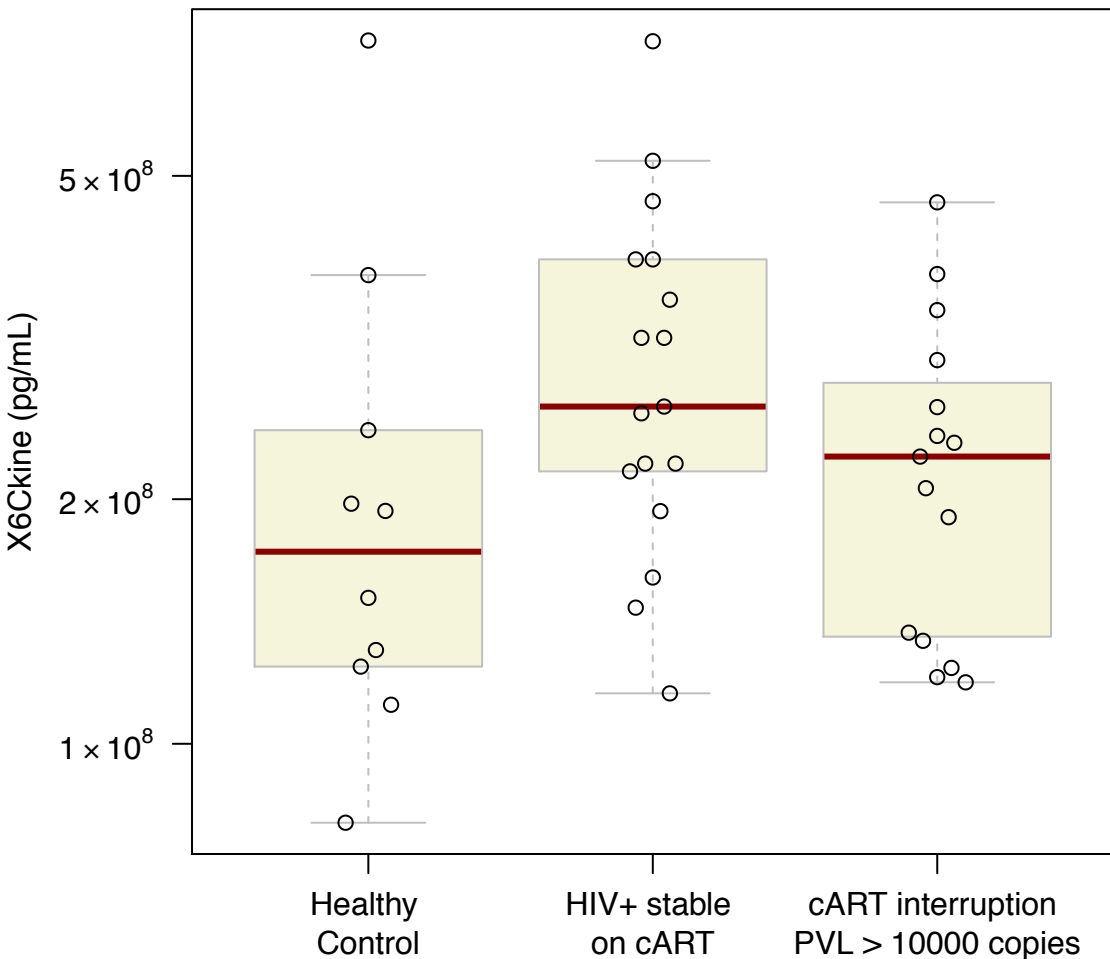

LLOQ: 77 pg/mL

# Adiponectin

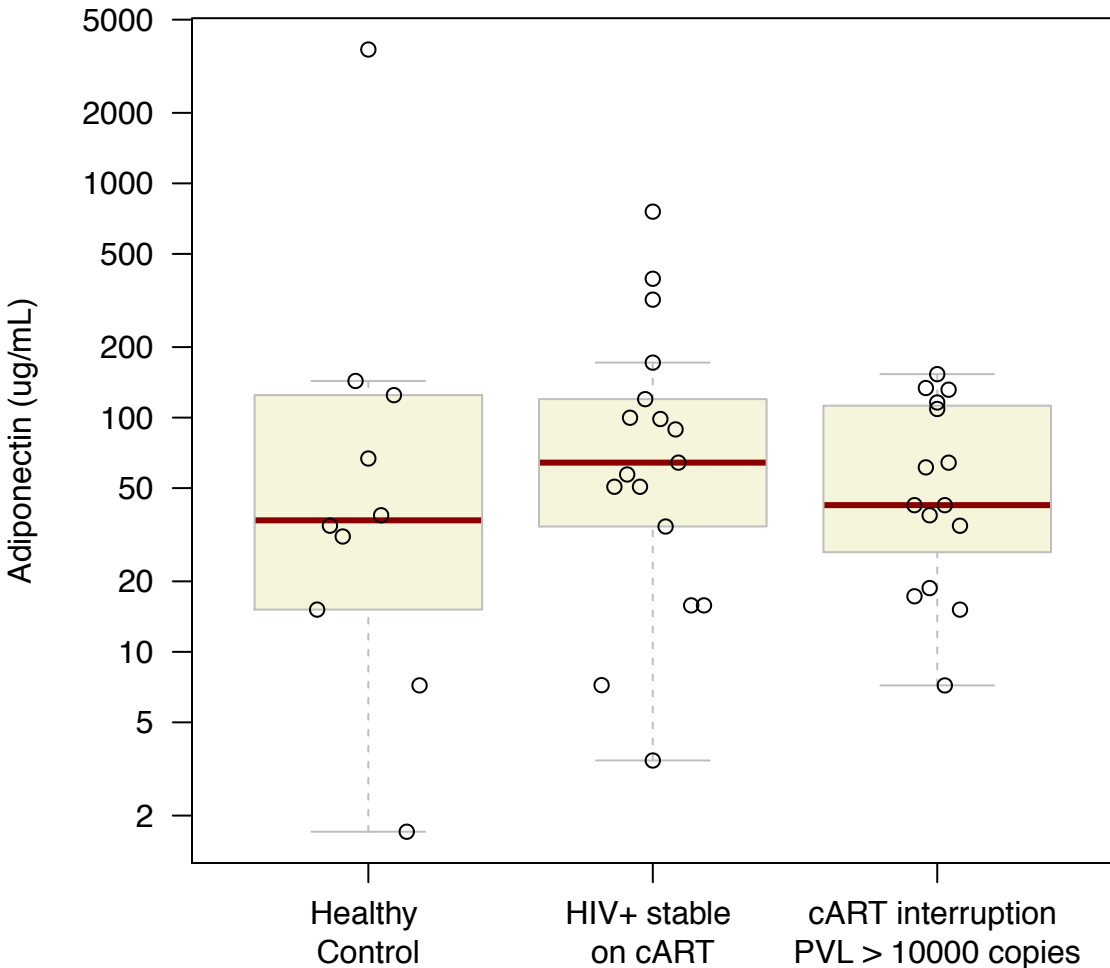

LLOQ: 0.051 ug/mL



# Aldose Reductase

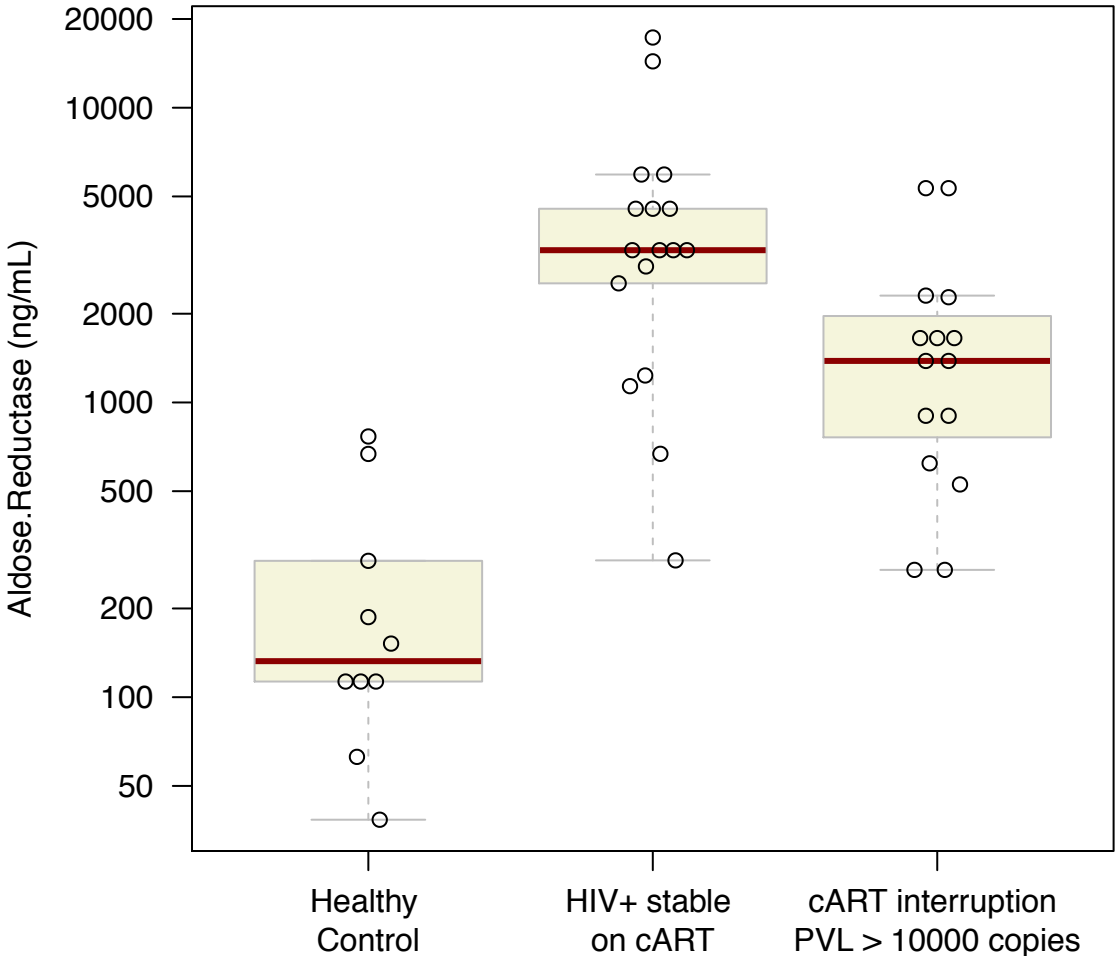

# Alpha-1-Antichymotrypsin (AACT)

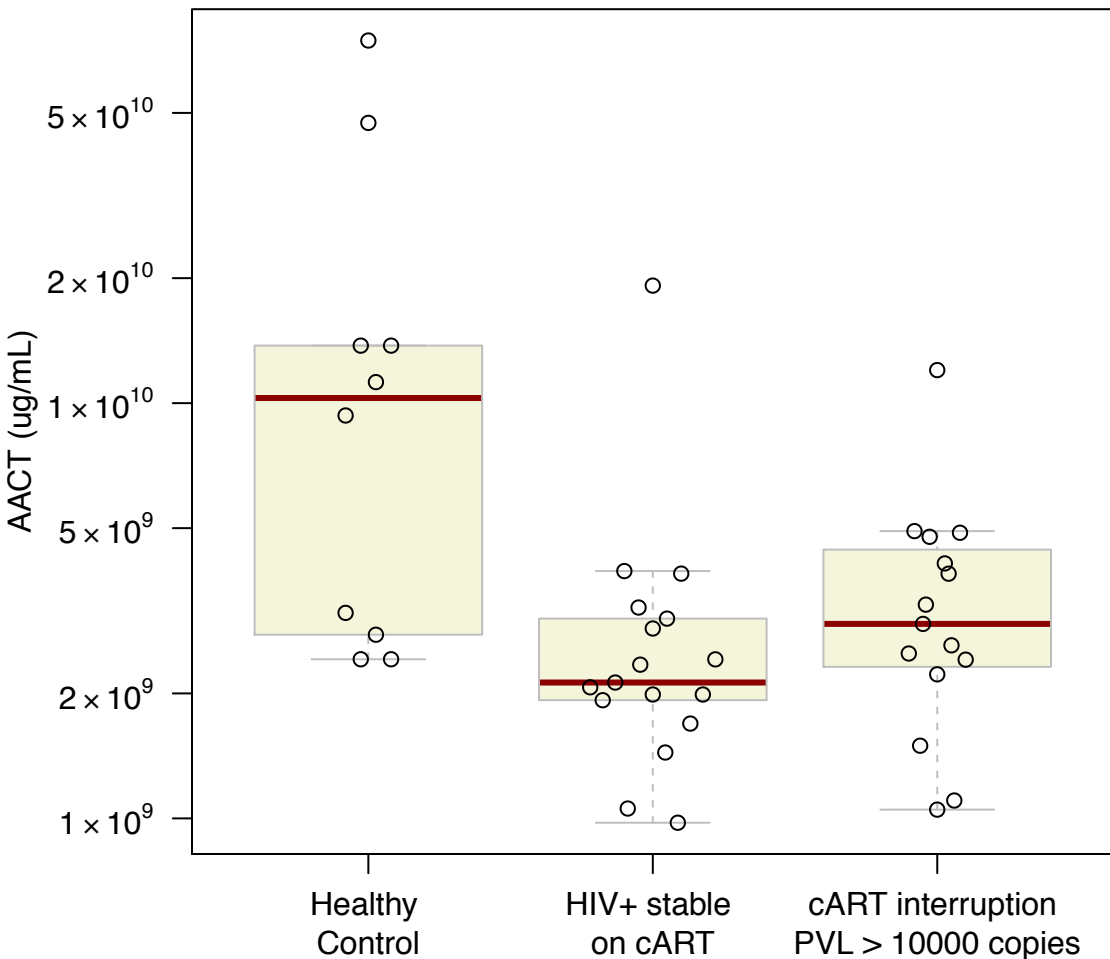

LLOQ: 13 ug/mL

# Alpha-1-Antitrypsin (AAT)

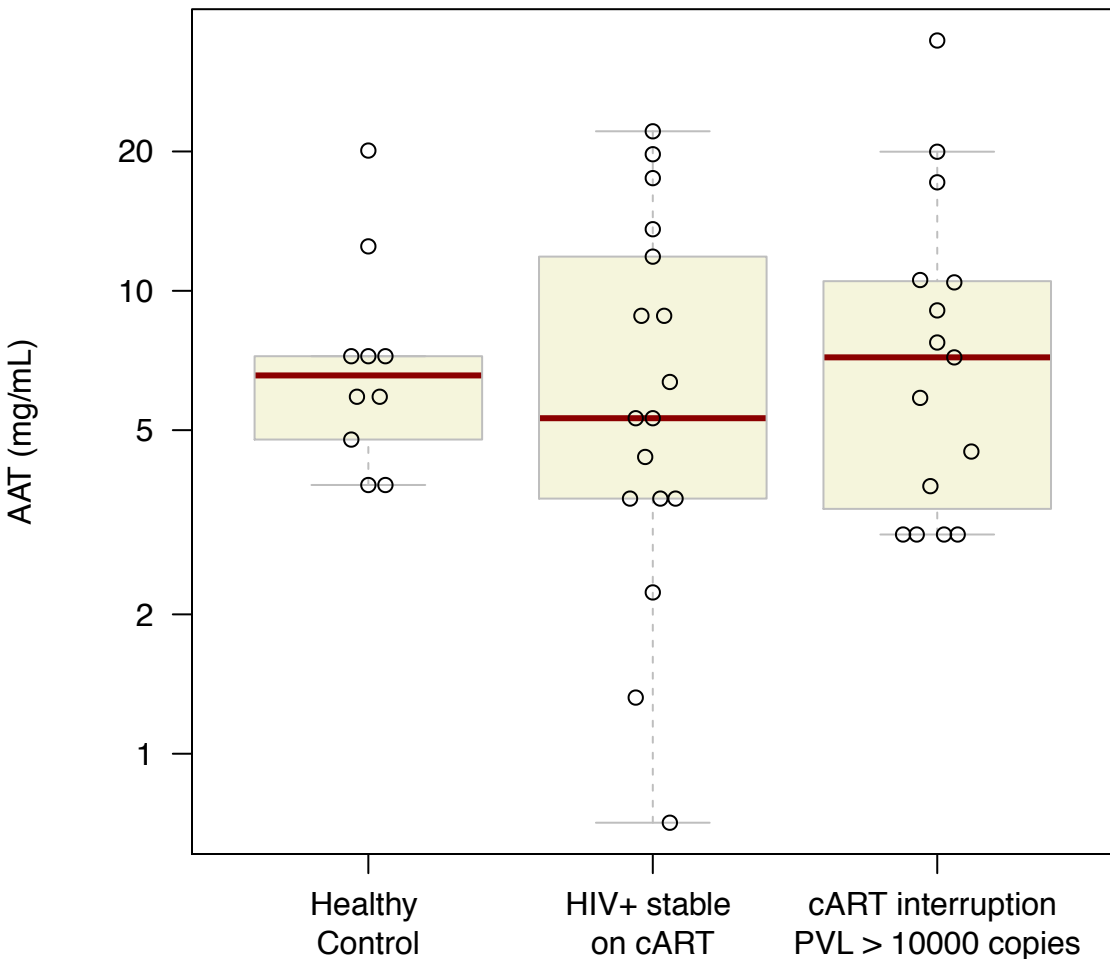

LLOQ: 0.016 mg/mL

# Alpha-1-Microglobulin (A1Micro)

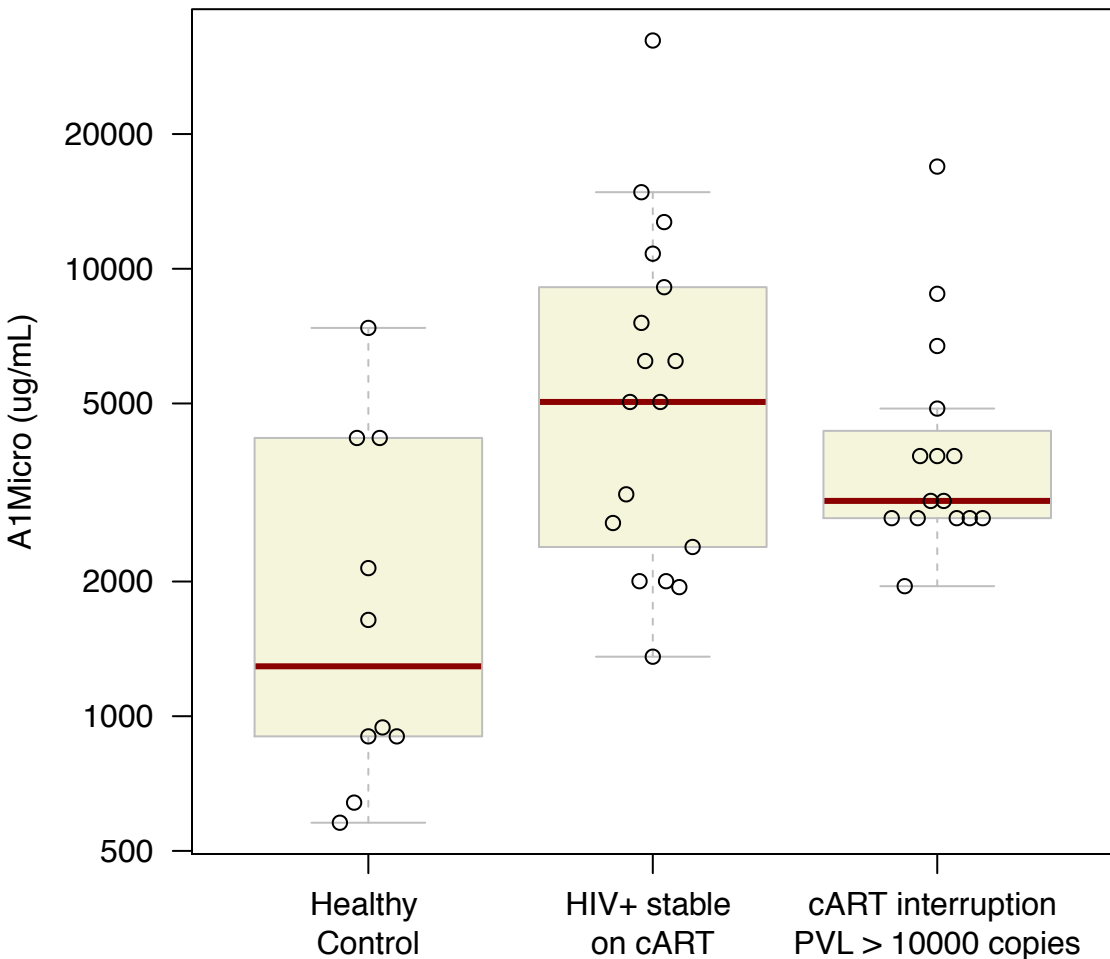

LLOQ: 0.13 ug/mL

# Alpha-2-Macroglobulin (A2Macro)

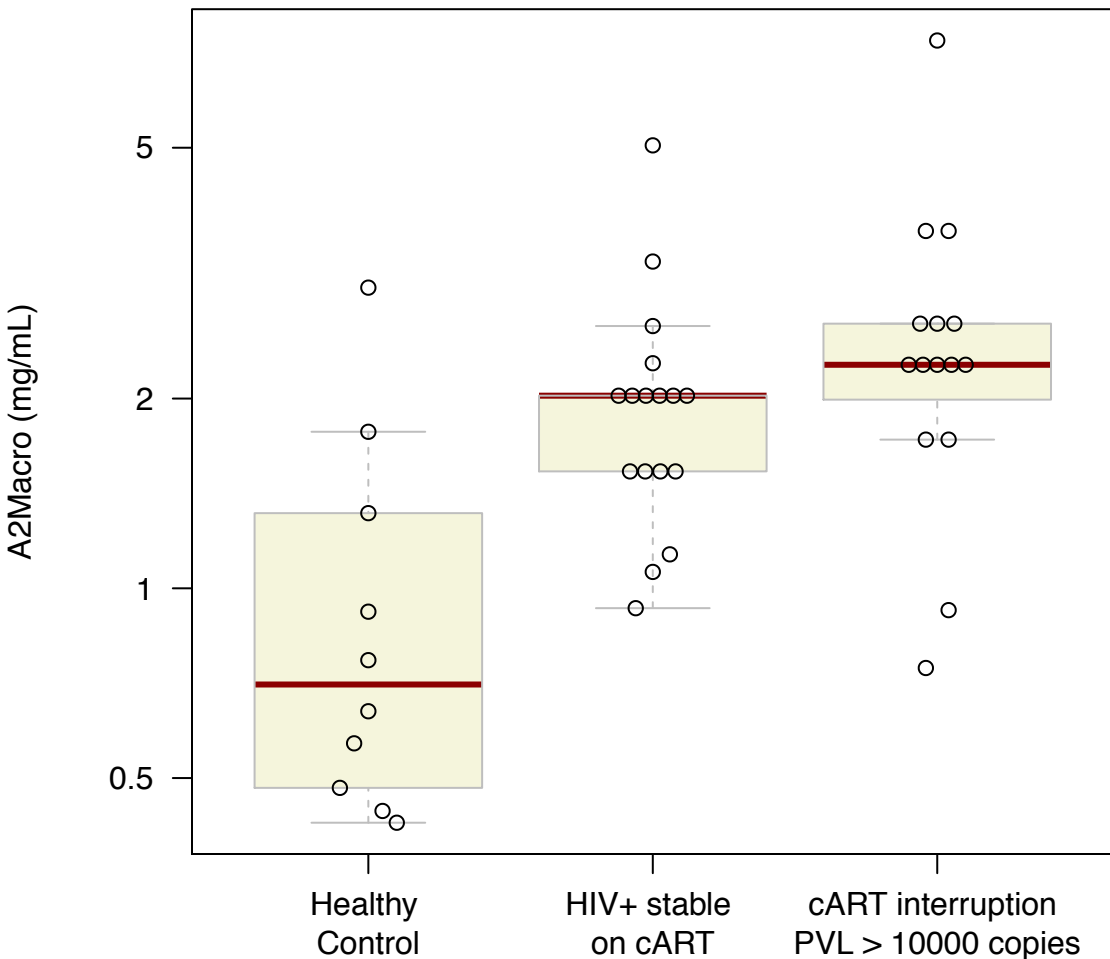

LLOQ: 0.023 mg/mL



# Alpha-Fetoprotein (AFP)

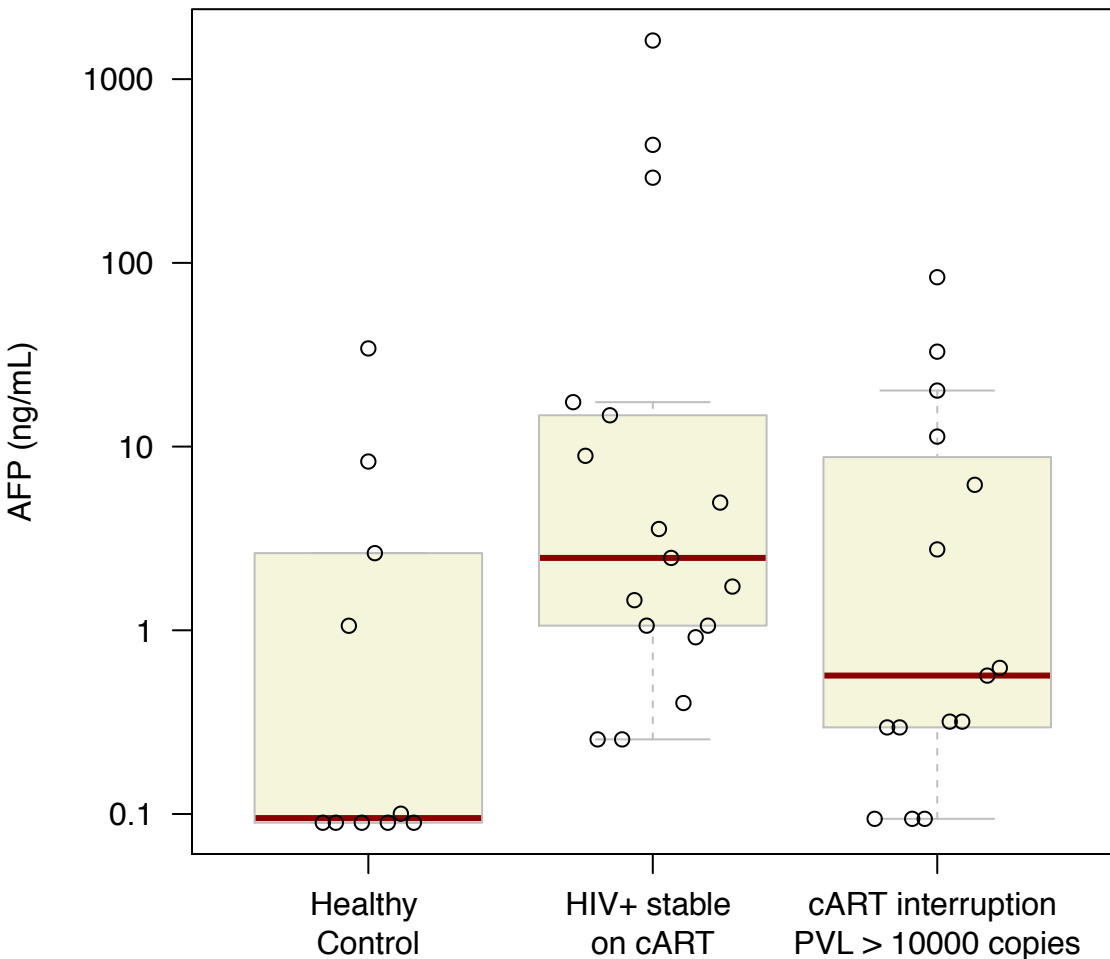

LLOQ: 0.55 ng/mL

# Angiogenin

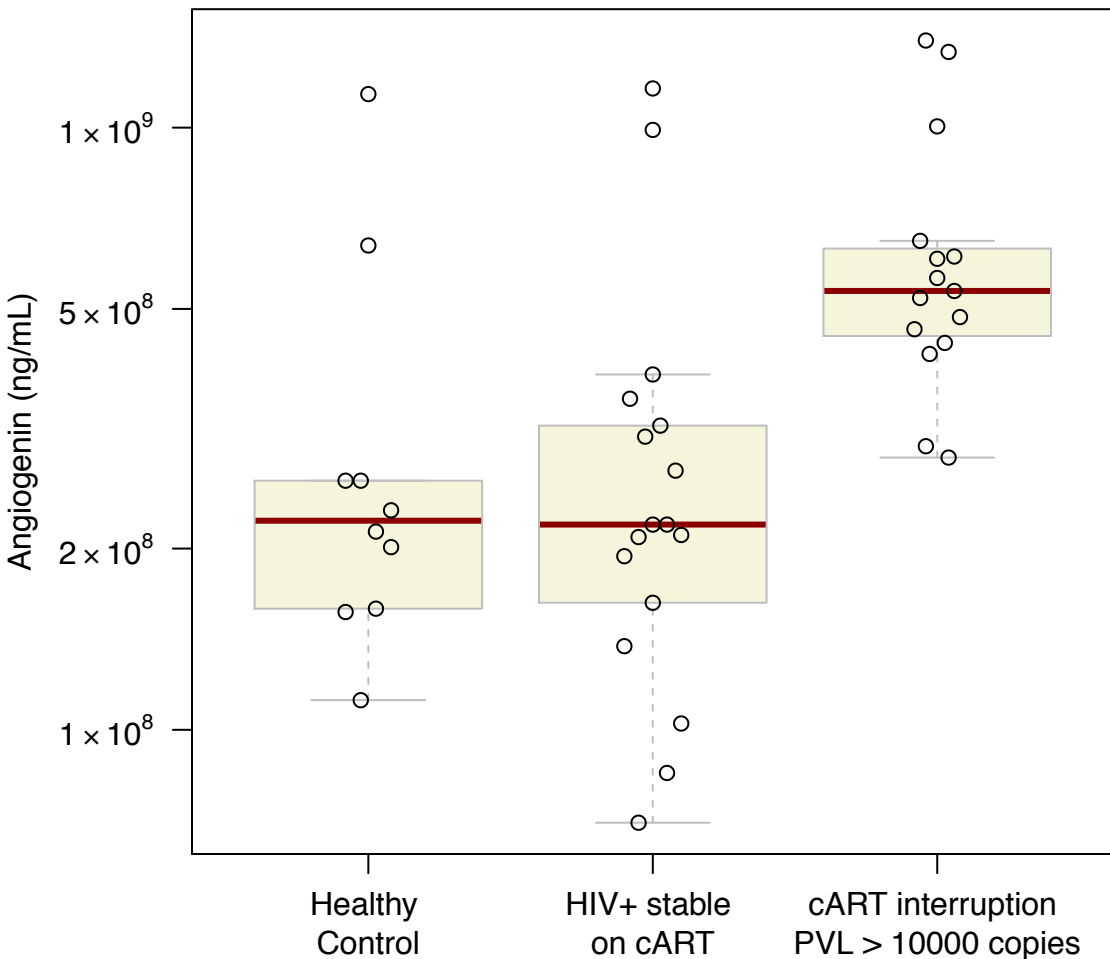

LLOQ: 4 ng/mL

# Angiopietin-2 (ANG-2)

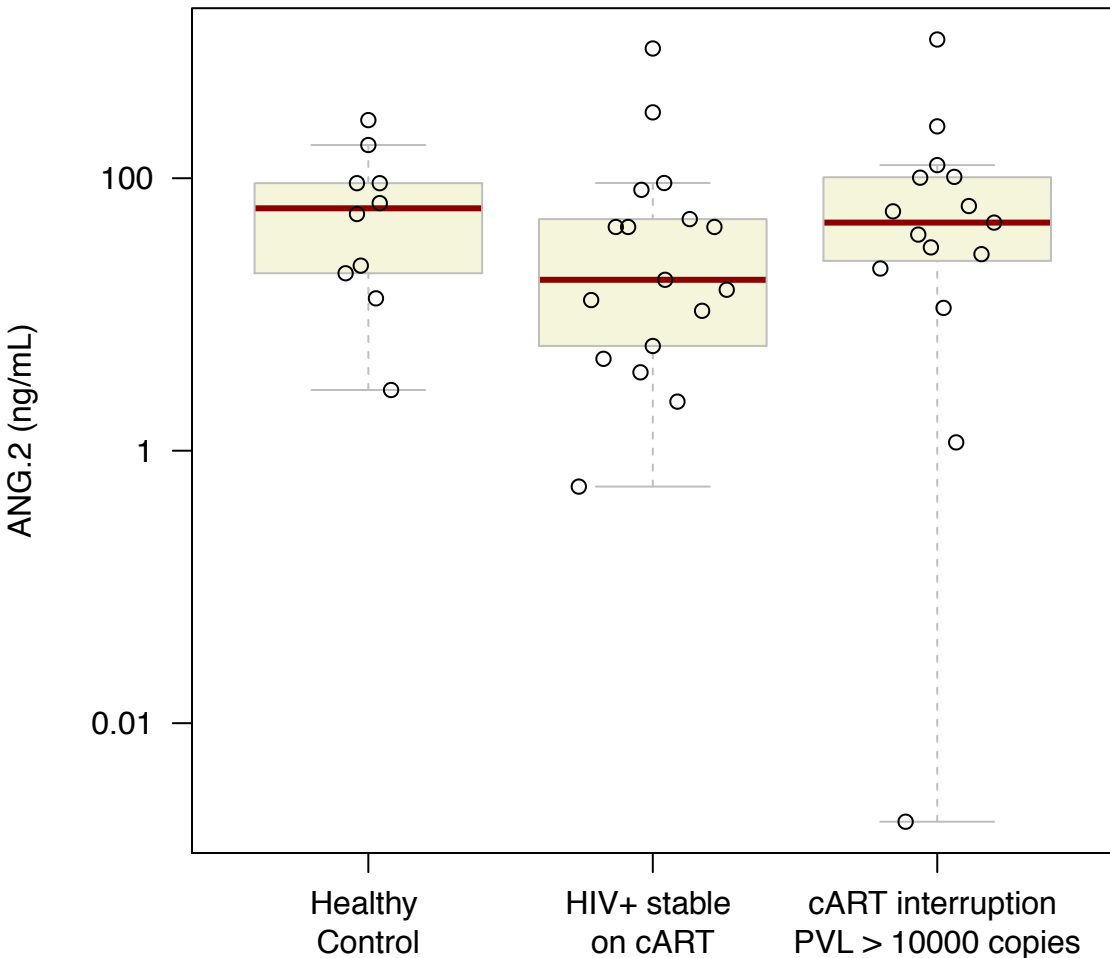

# Angiotensin–Converting Enzyme (ACE)

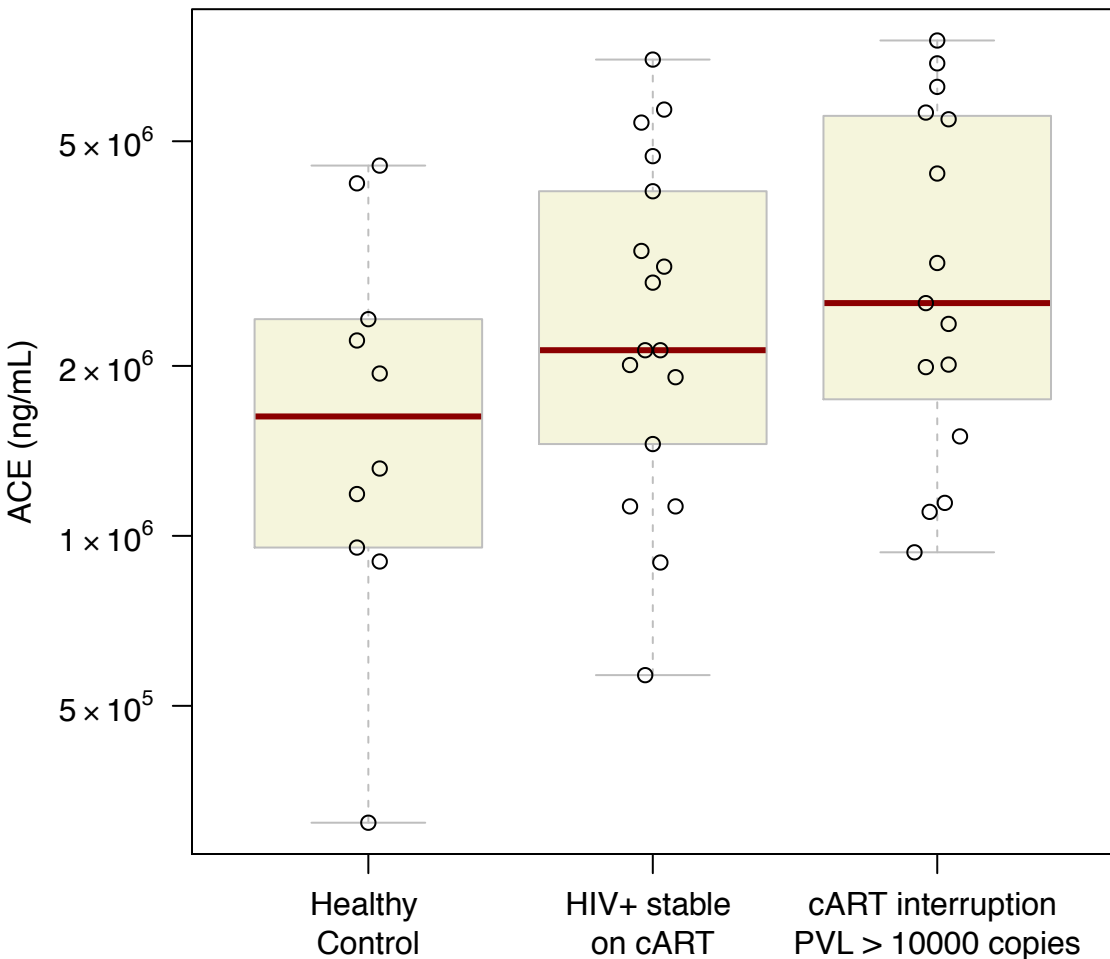

LLOQ: 0.58 ng/mL

# Angiotensinogen

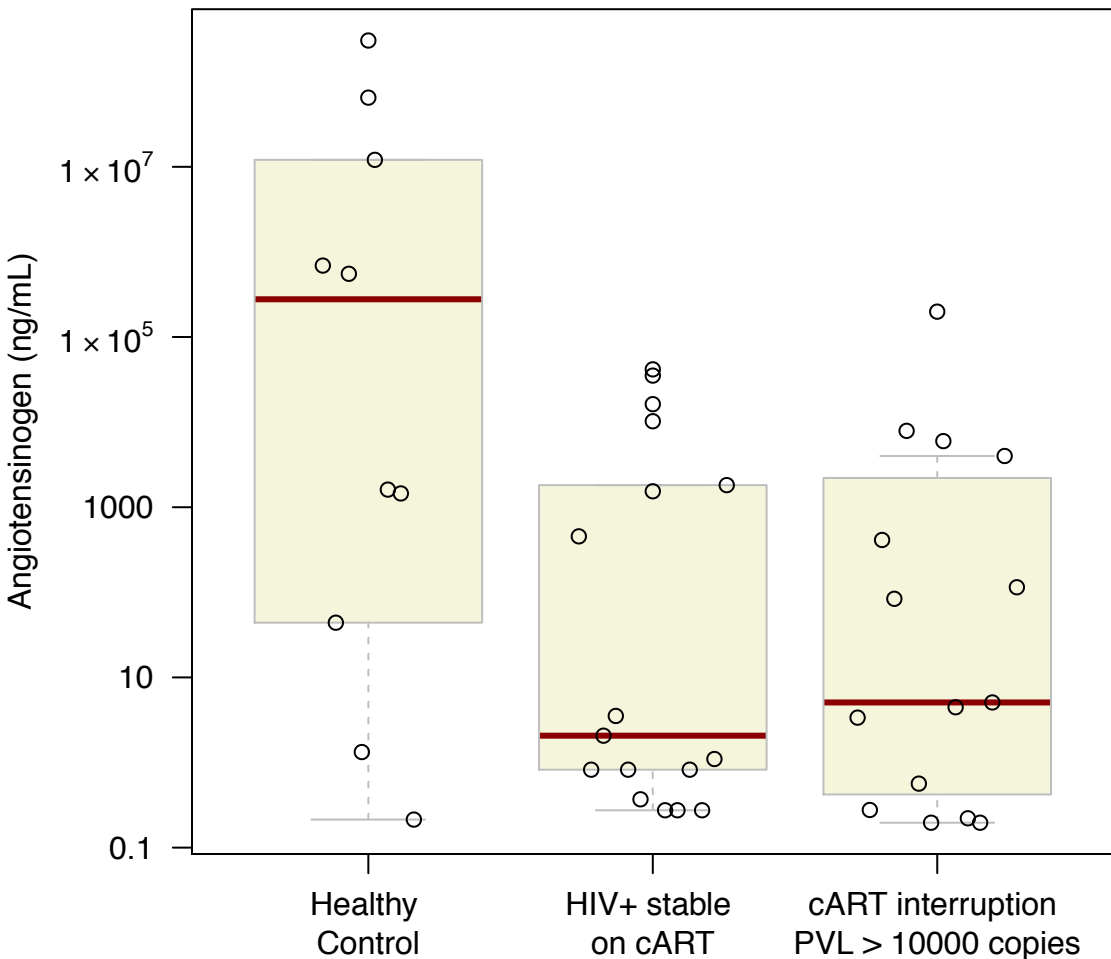

# Apolipoprotein(a) (Lp(a))

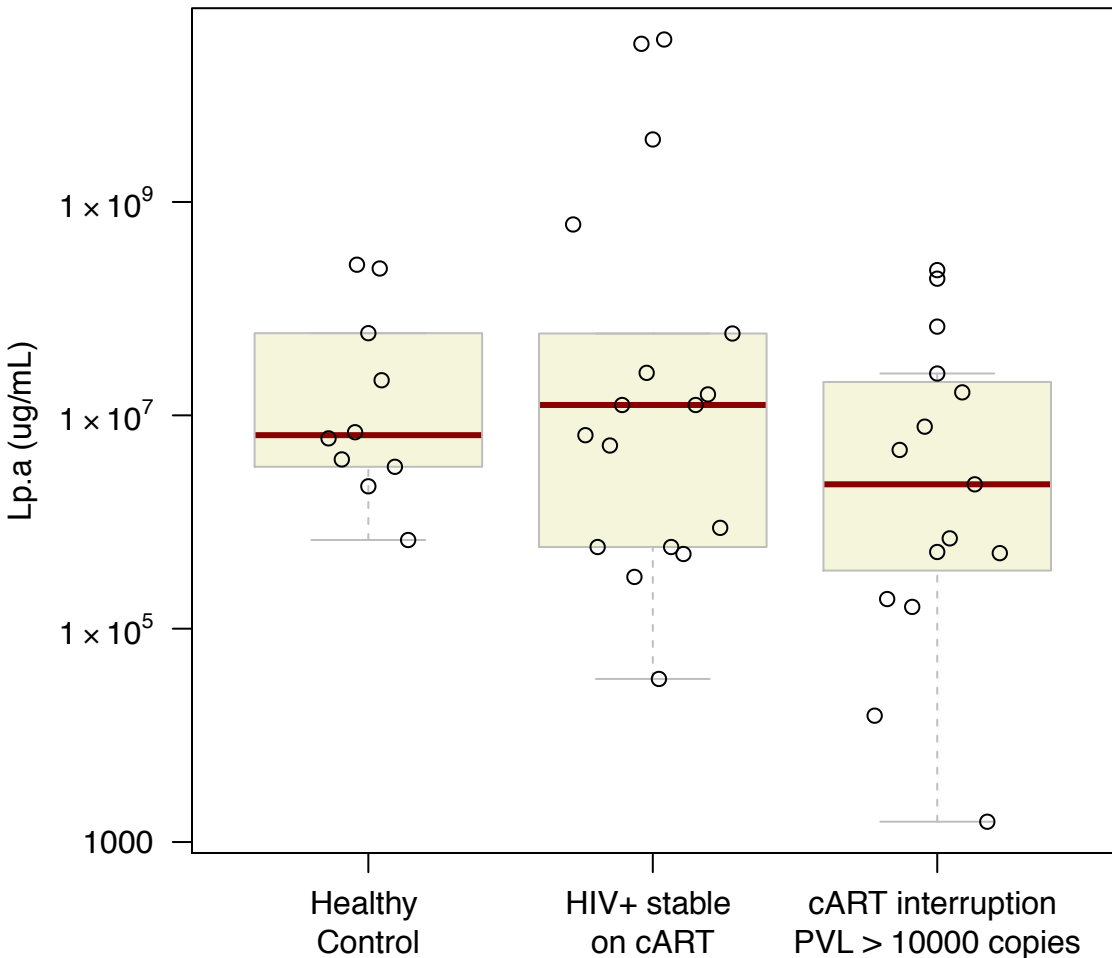

LLOQ: 2.7 ug/mL

# Apolipoprotein A-I (Apo A-I)

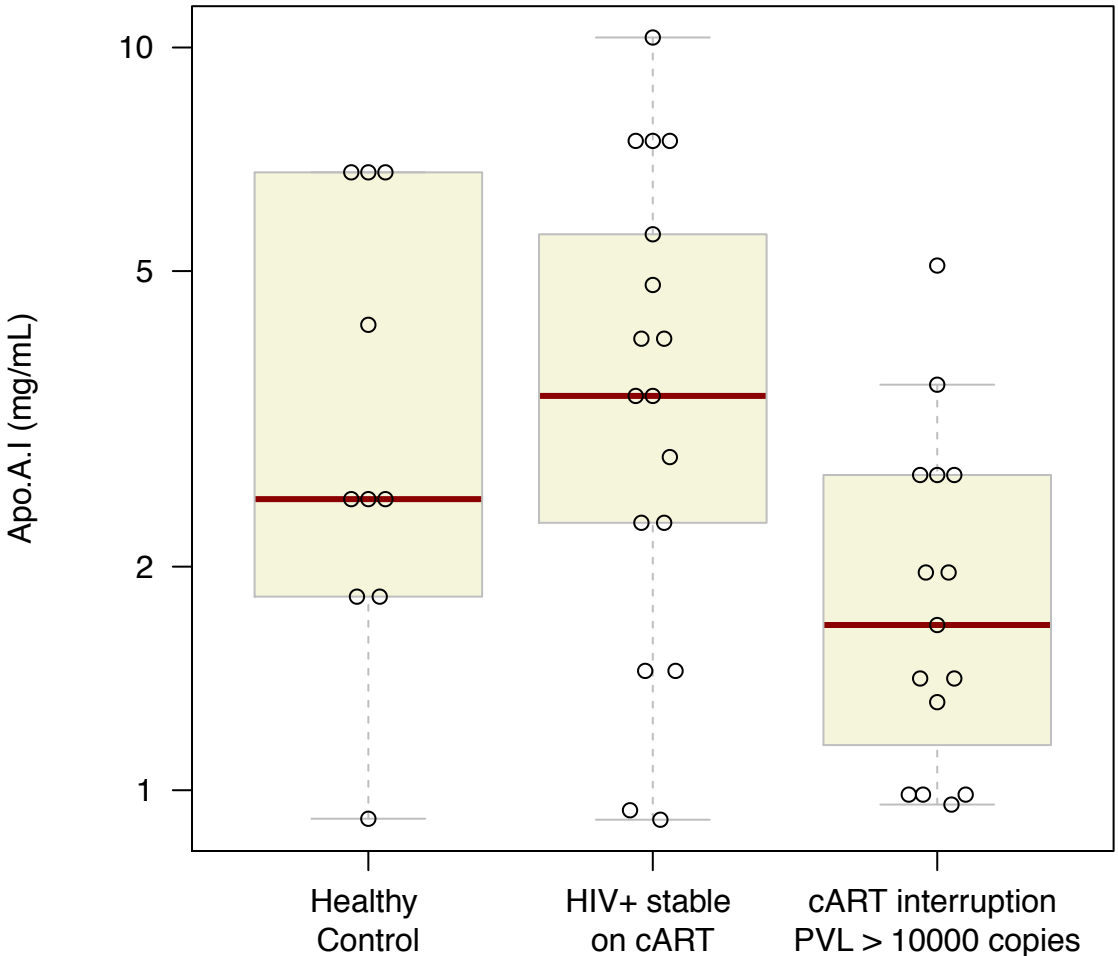

LLOQ: 0.06 mg/mL

# Apolipoprotein A-II (Apo A-II)

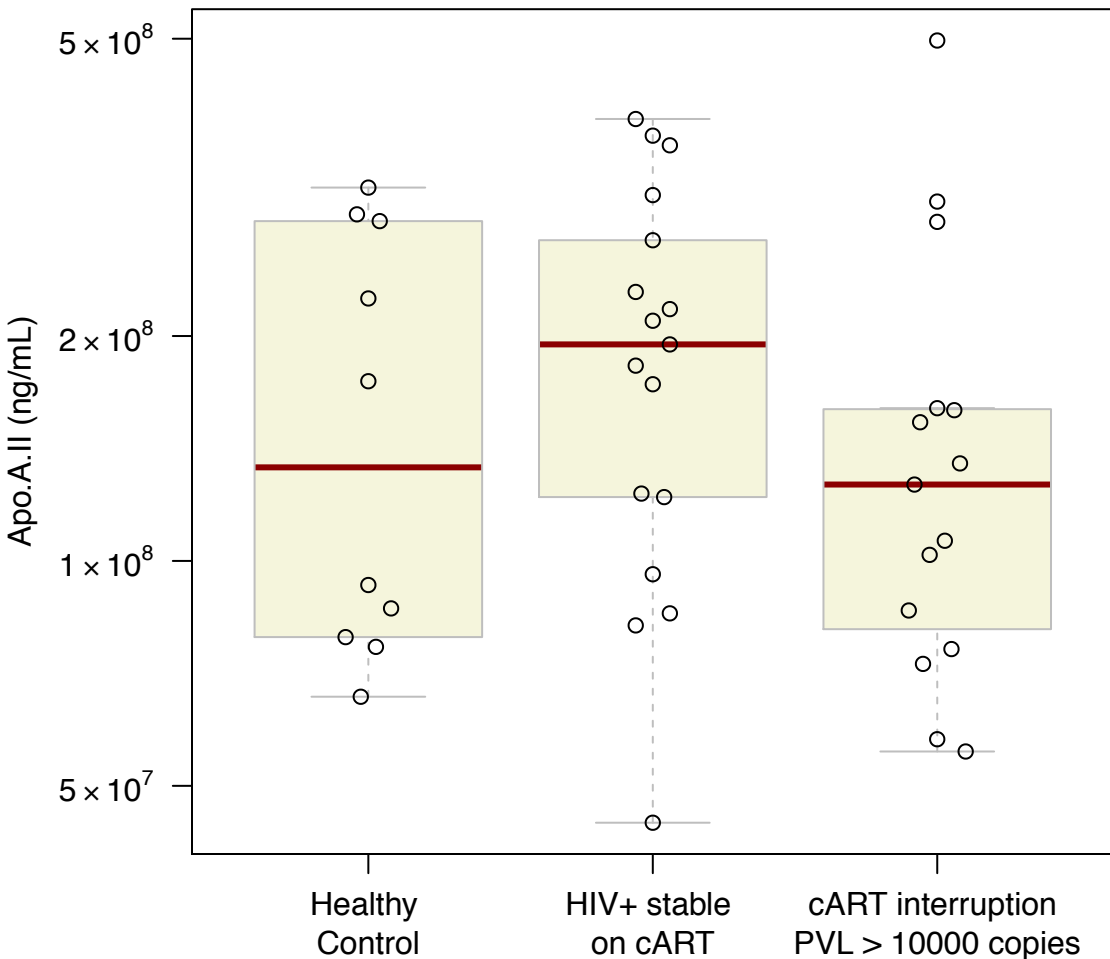

LLOQ: 14 ng/mL



# Apolipoprotein A-IV (Apo A-IV)

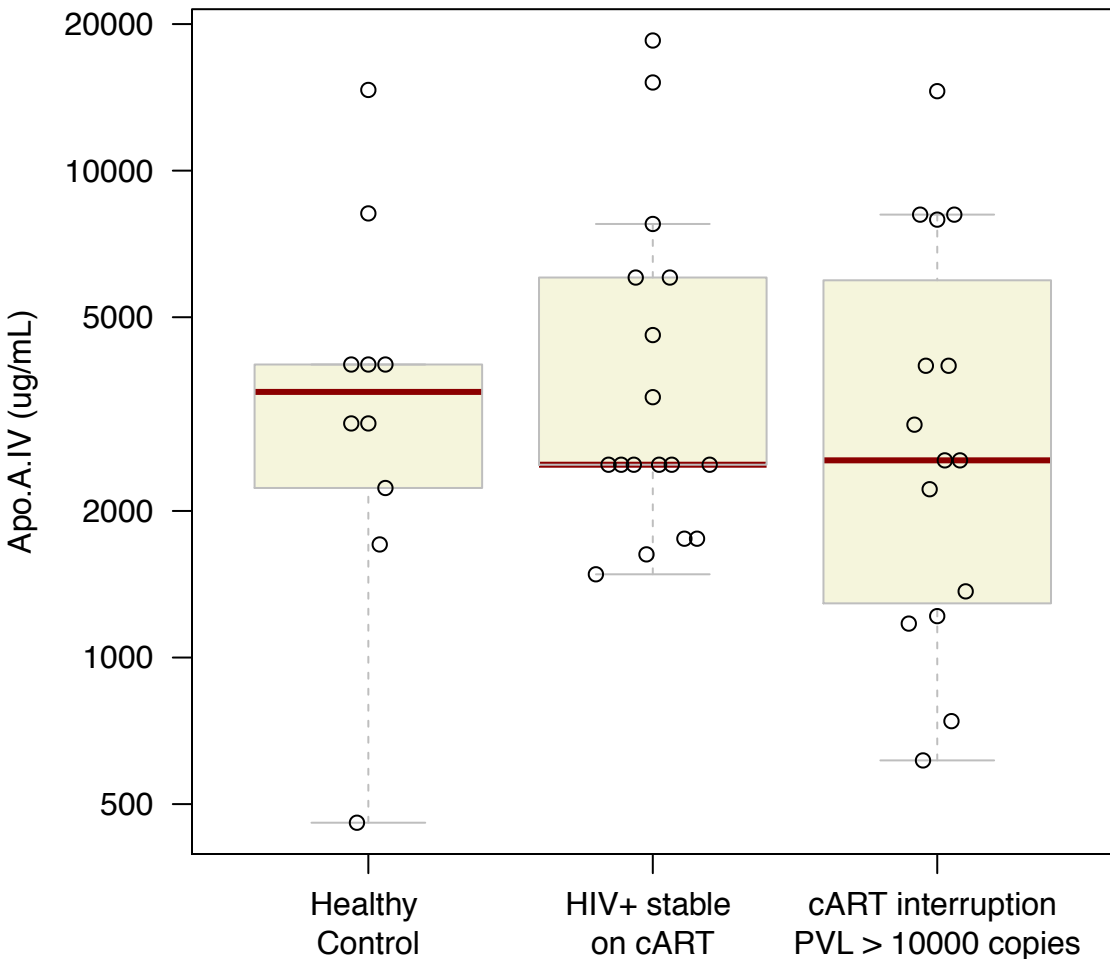

LLOQ: 0.96 ug/mL

# Apolipoprotein B (Apo B)

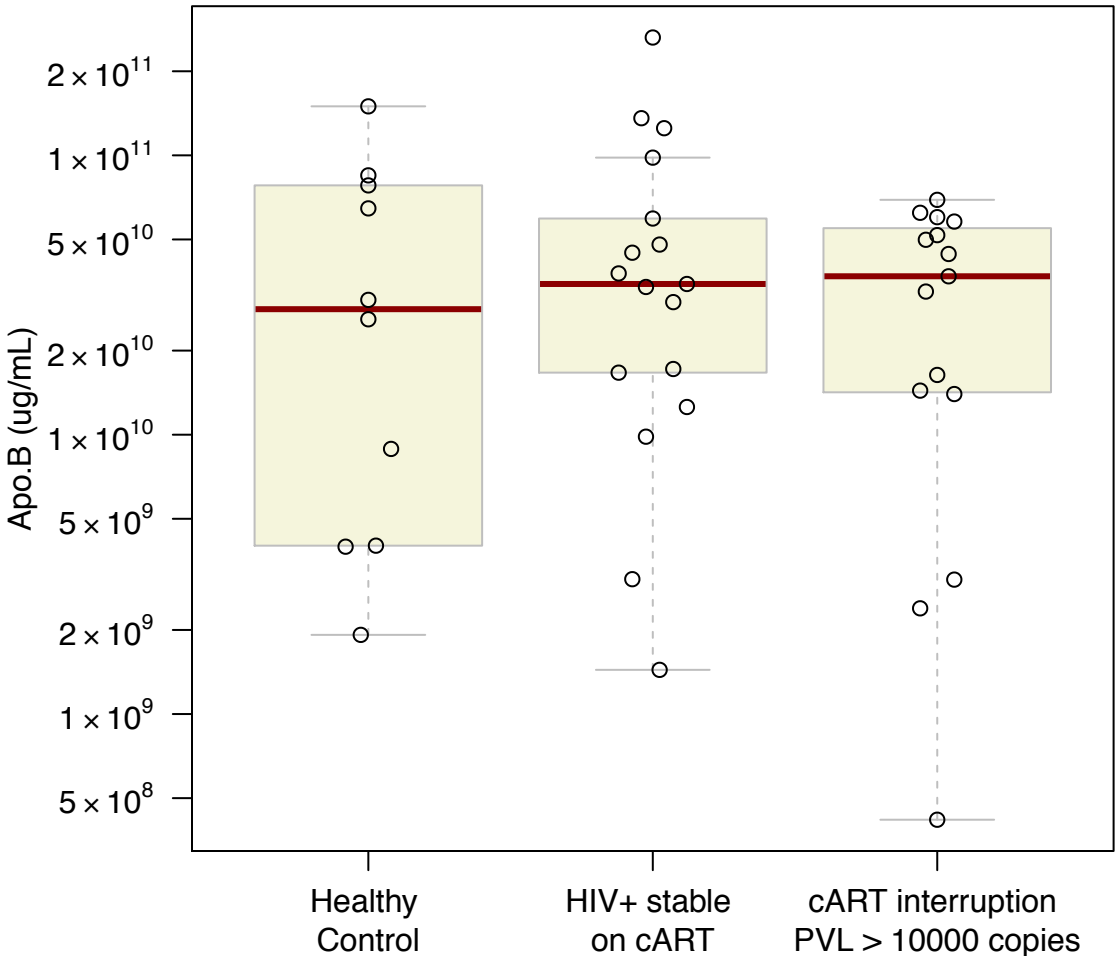

LLOQ: 42 ug/mL

# Apolipoprotein C-I (Apo C-I)

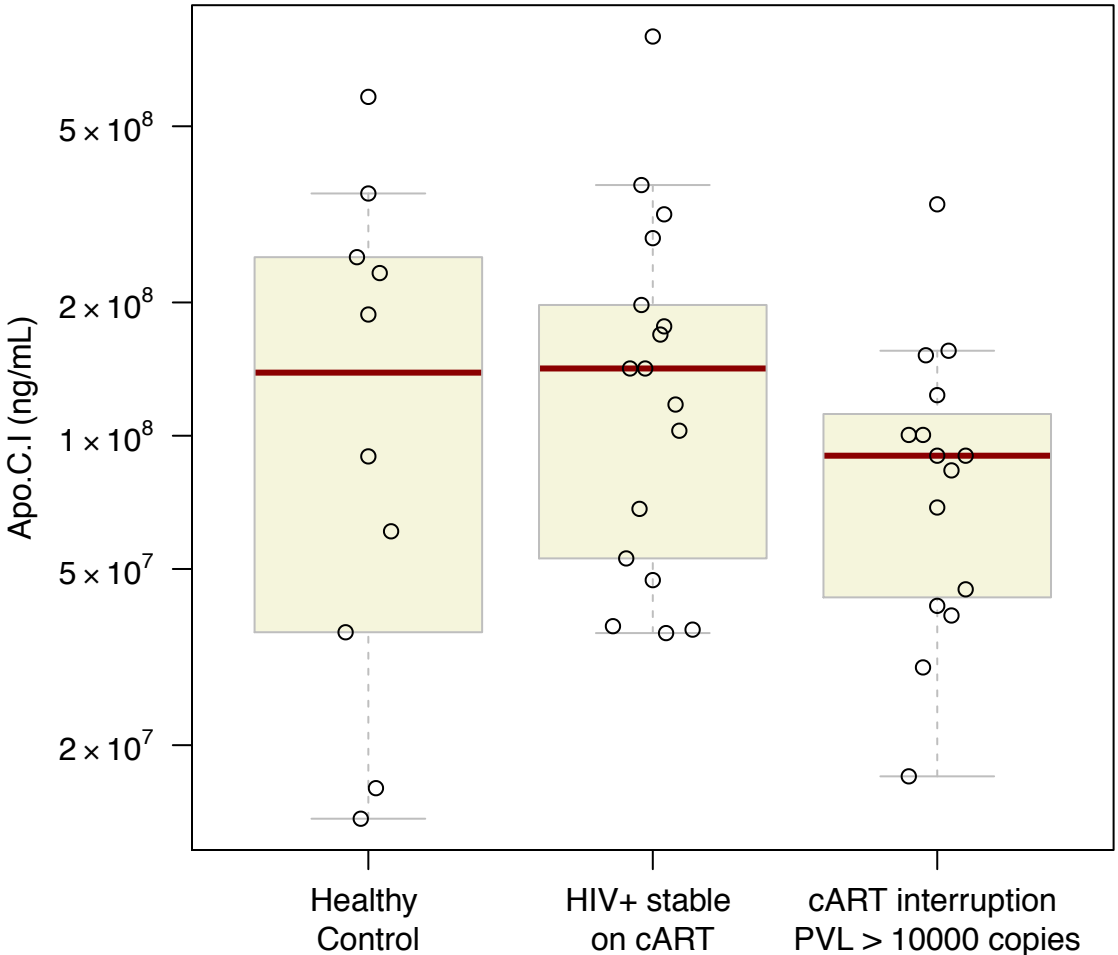

LLOQ: 22 ng/mL

# Apolipoprotein C-III (Apo C-III)

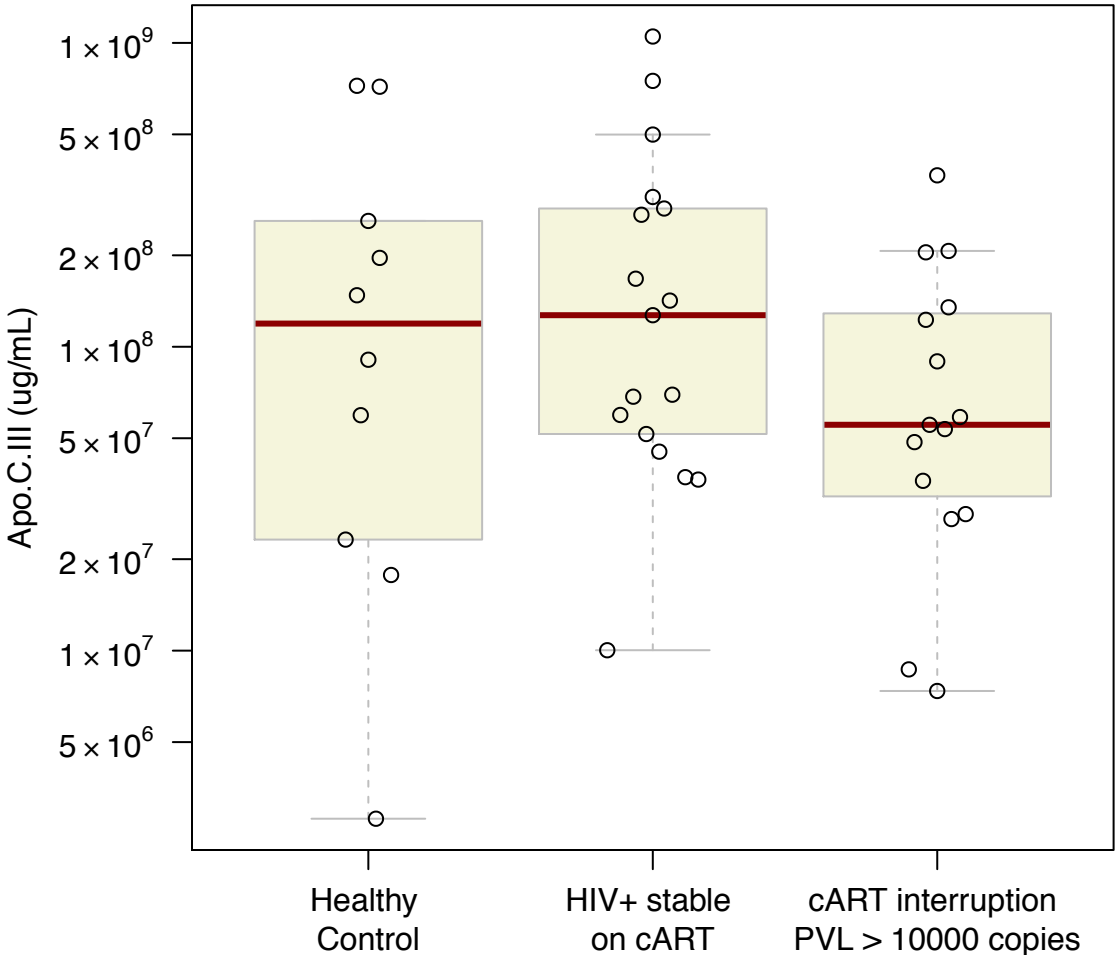

LLOQ: 11 ug/mL

# Apolipoprotein D (Apo D)

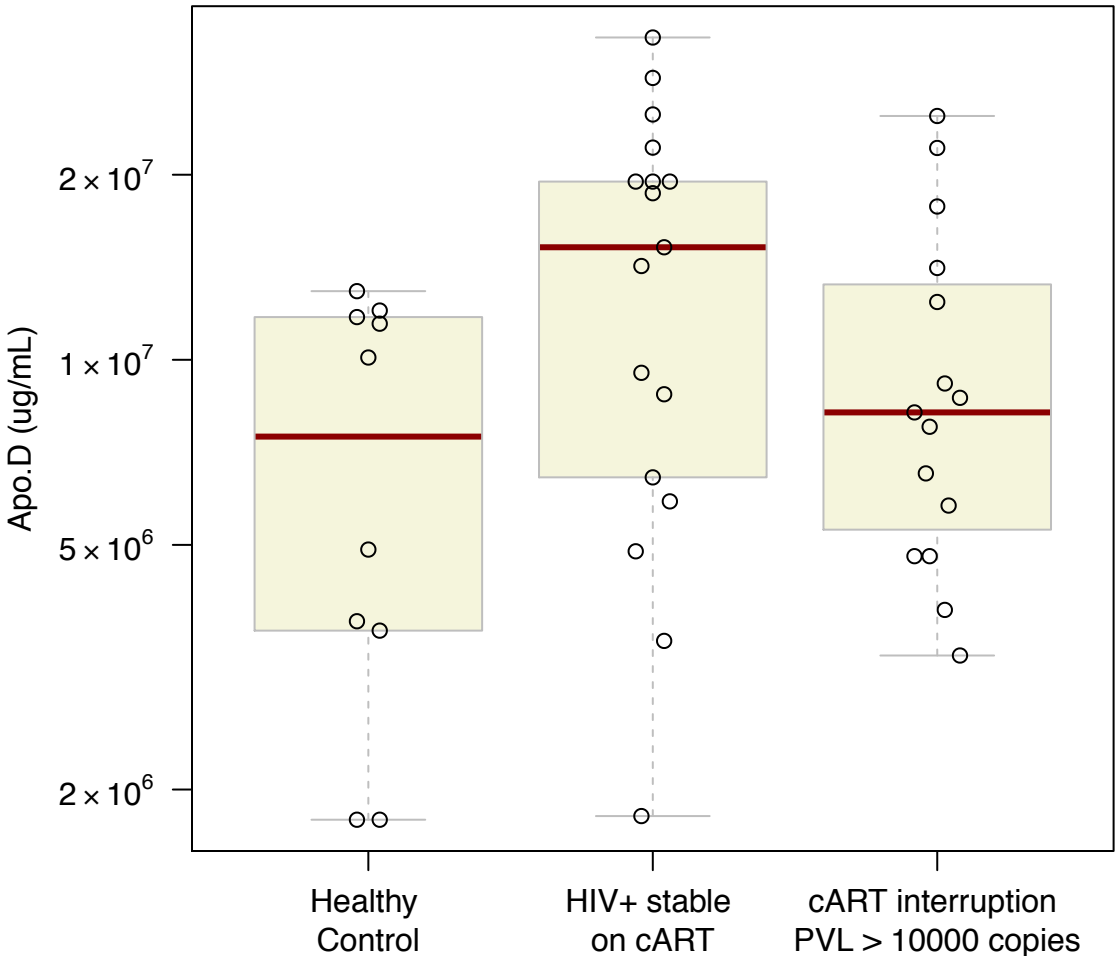

LLOQ: 74 ug/mL

# Apolipoprotein E (Apo E)

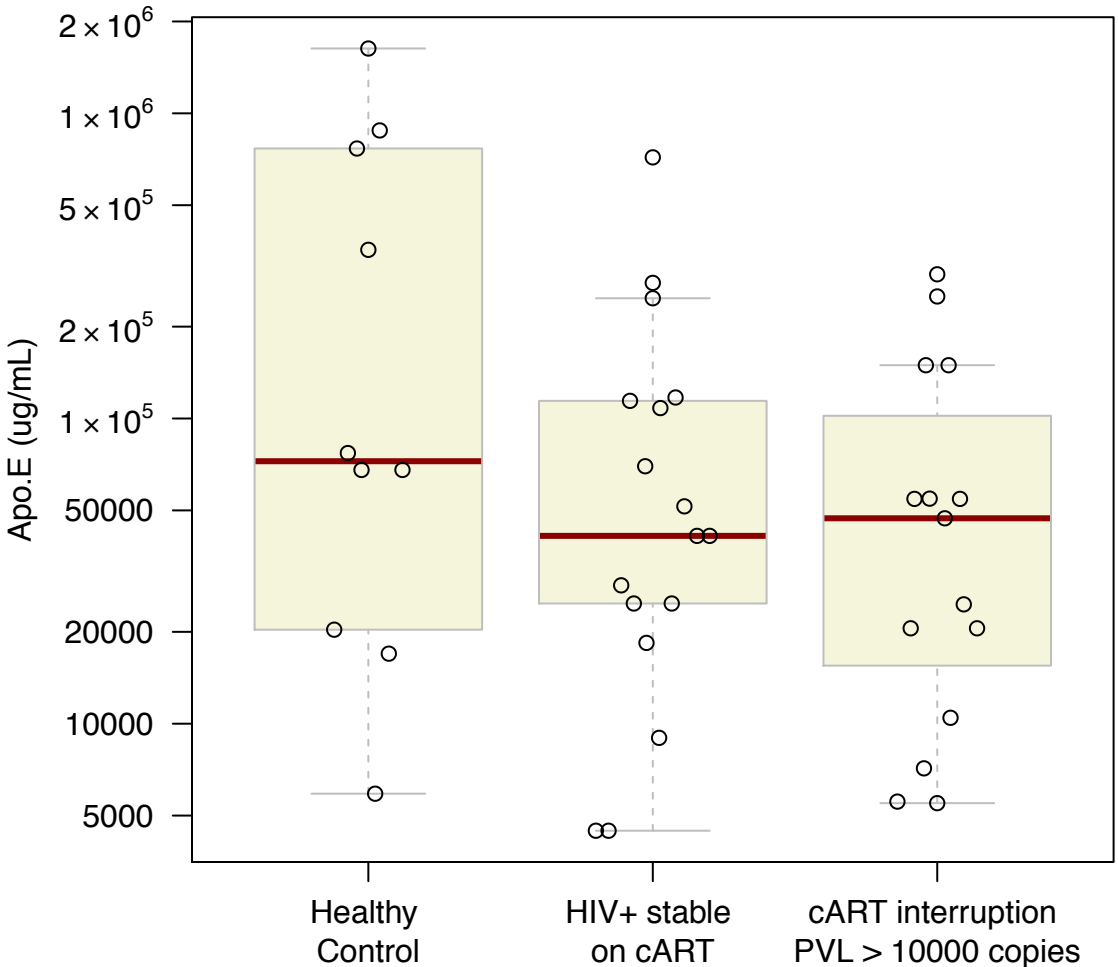

LLOQ: 4.9 ug/mL

# Apolipoprotein H (Apo H)

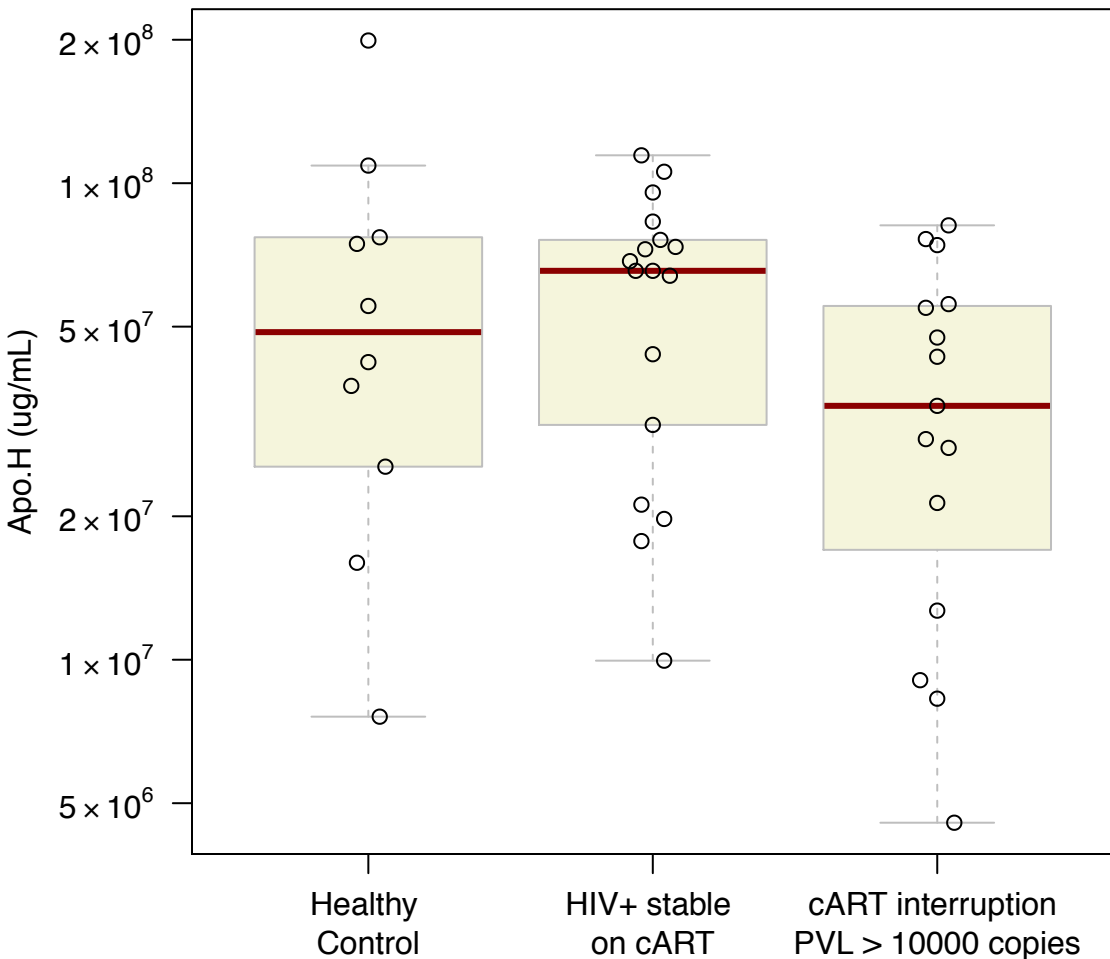

LLOQ: 62 ug/mL

# AXL Receptor Tyrosine Kinase (AXL)

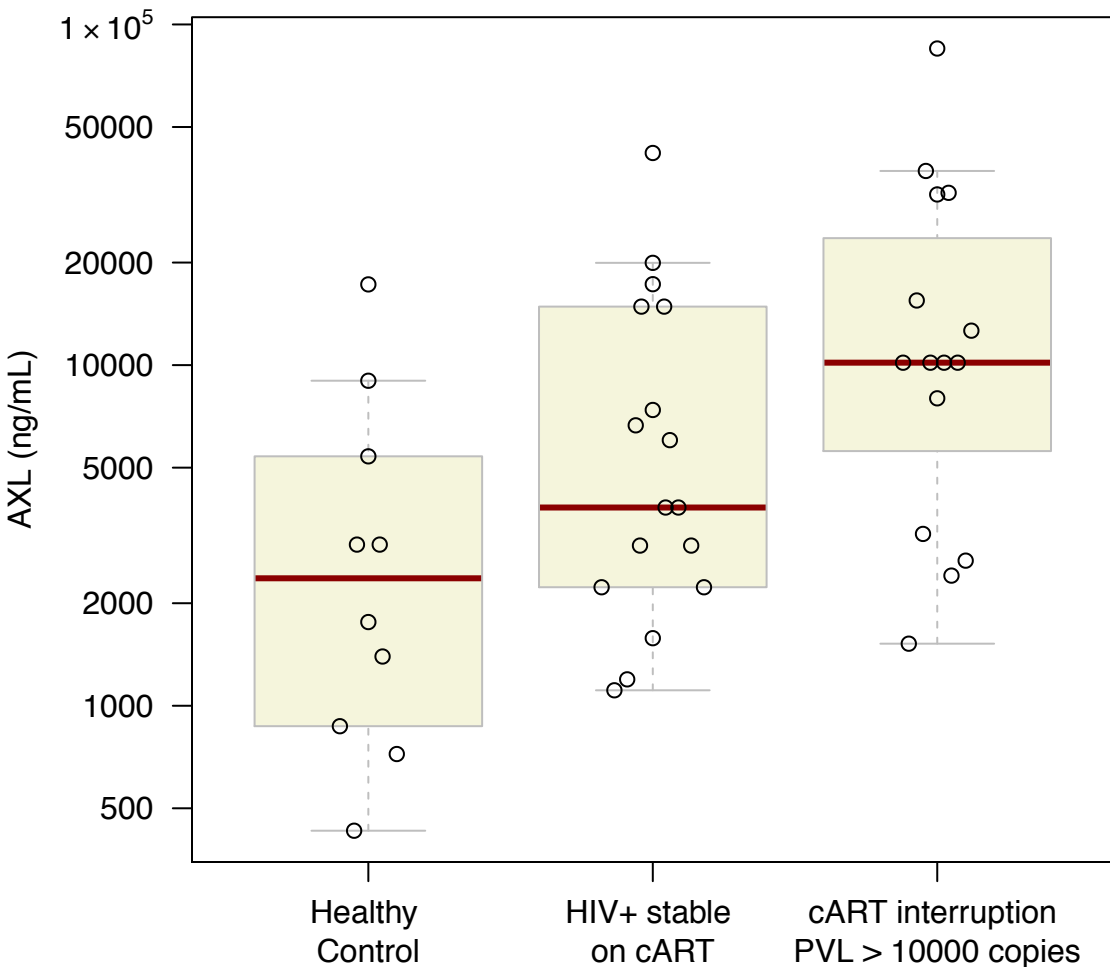

LLOQ: 0.05 ng/mL



# B cell-activating factor (BAFF)

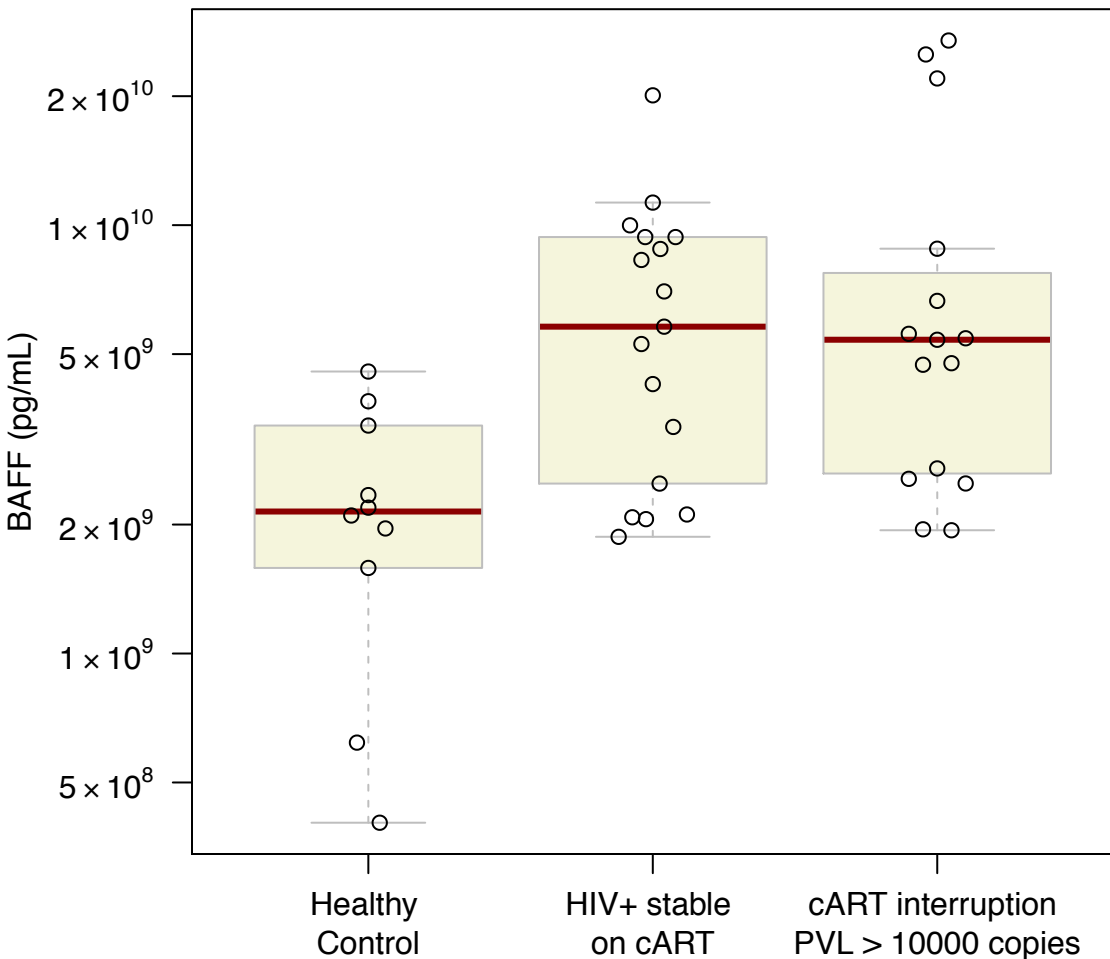

LLOQ: 19 pg/mL

# B Lymphocyte Chemoattractant (BLC)

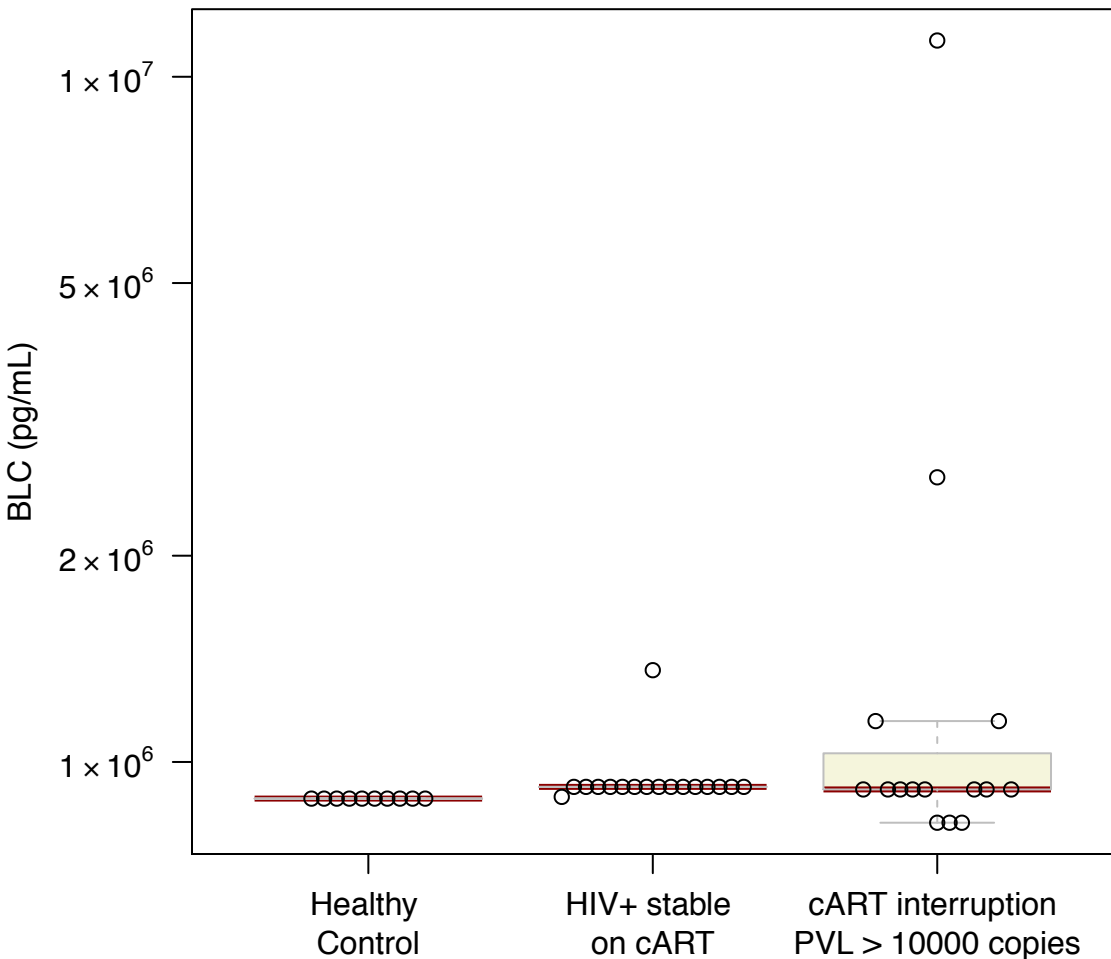

LLOQ: 62 pg/mL

# Beta-2-Microglobulin (B2M)

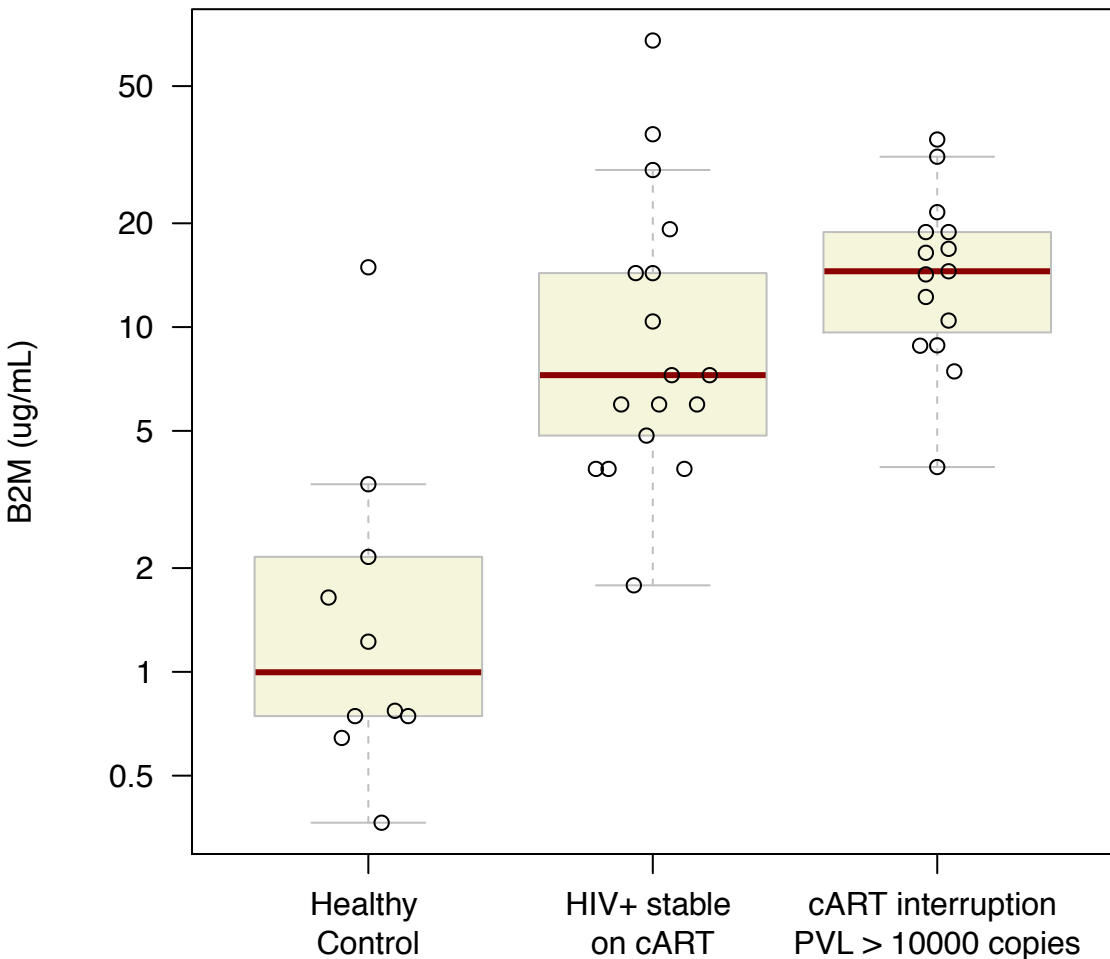

LLOQ: 0.0069 ug/mL

# Brain-Derived Neurotrophic Factor (BDNF)

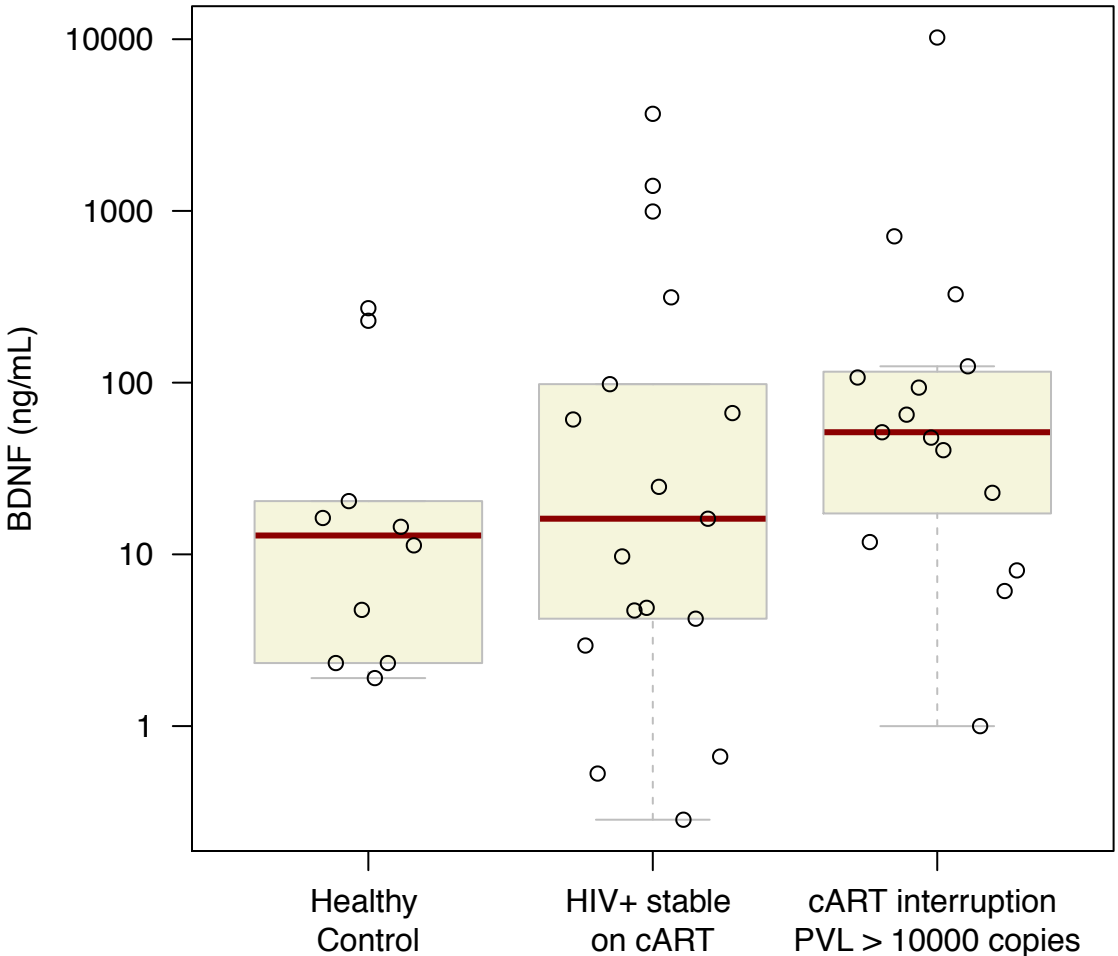

# C-Peptide

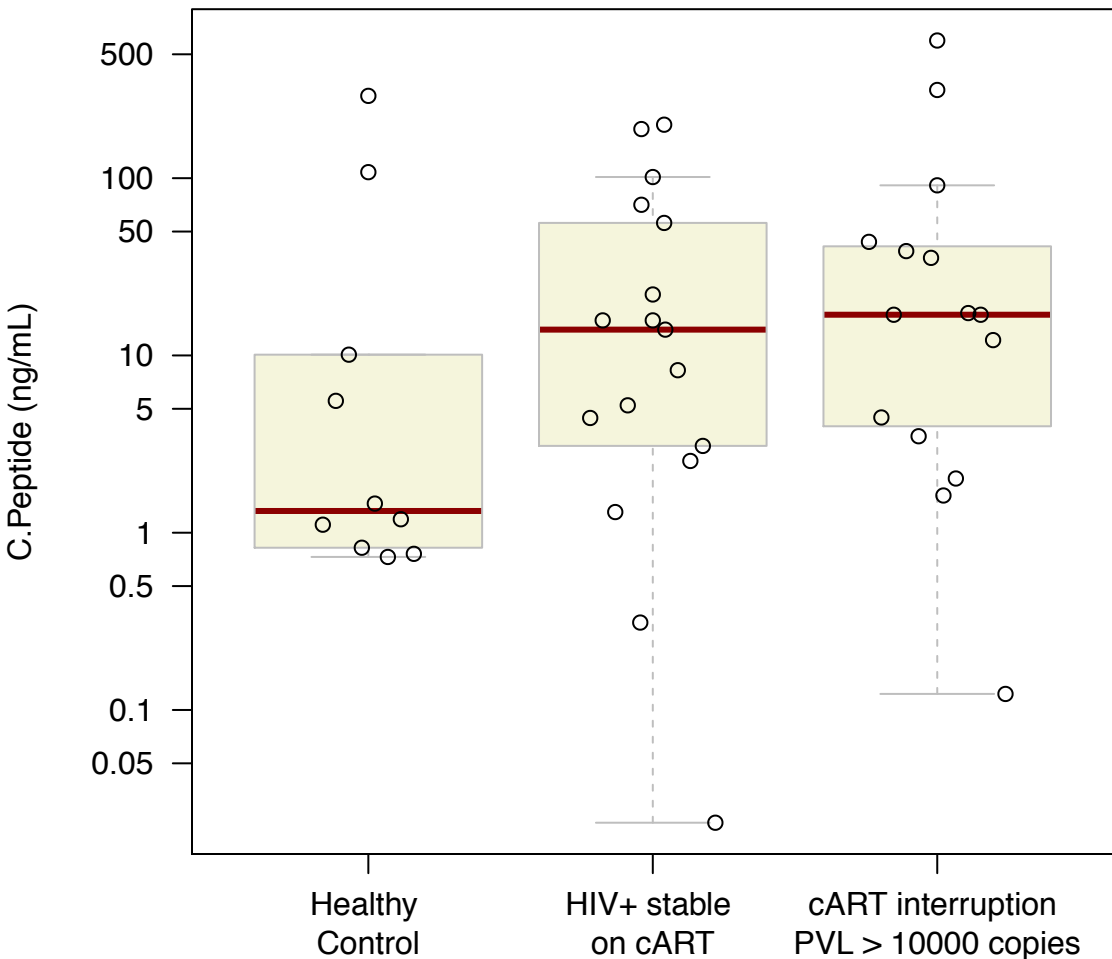

LLOQ: 0.015 ng/mL

# C-Reactive Protein (CRP)

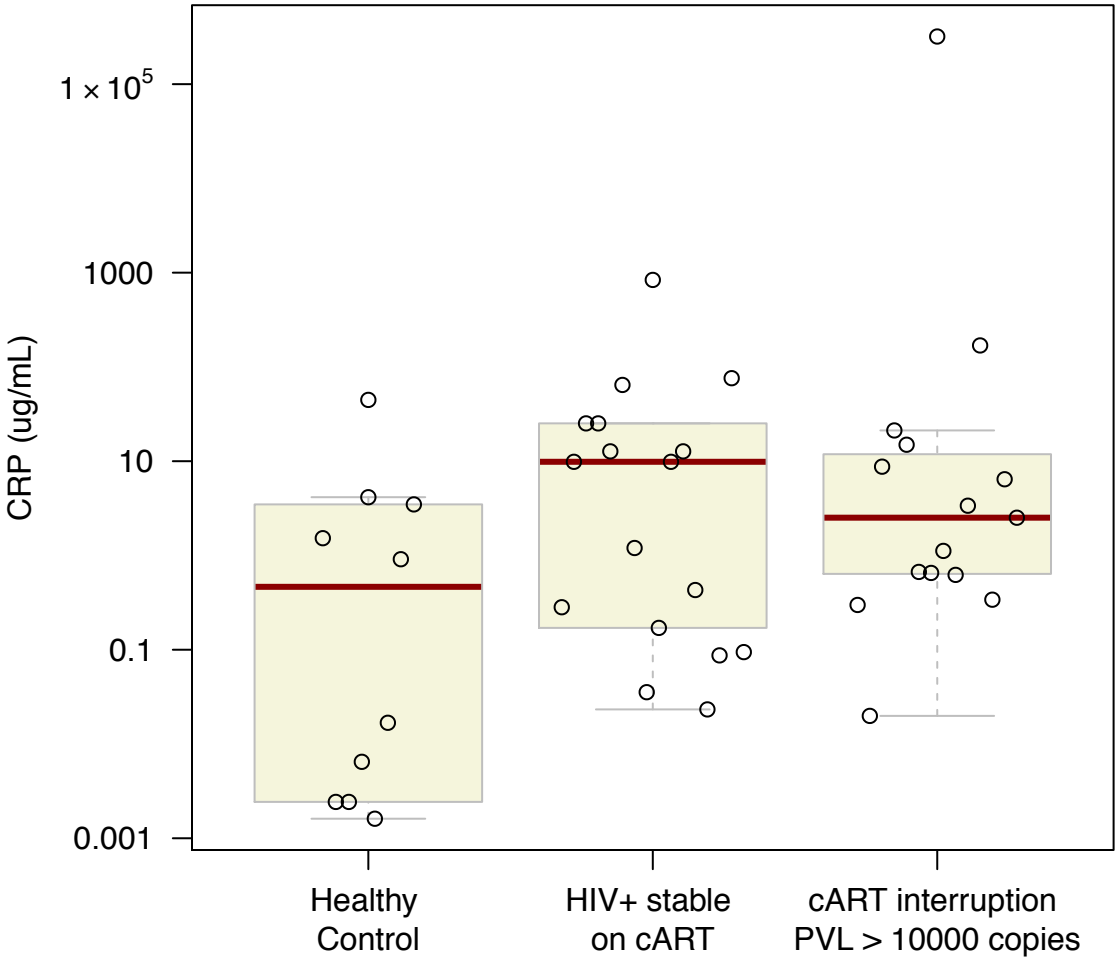

# Cancer Antigen 125 (CA-125)

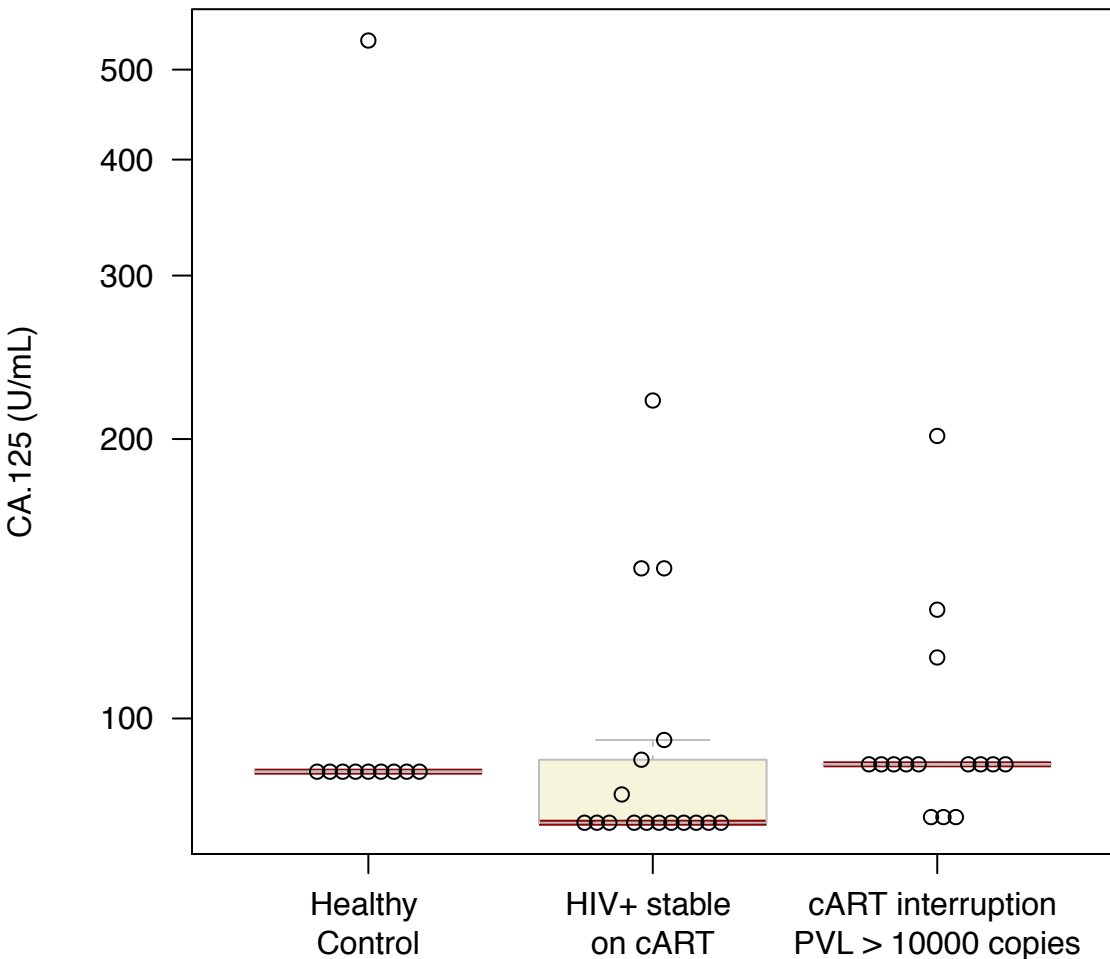

LLOQ: 3.8 U/mL

# Cancer Antigen 15-3 (CA-15-3)

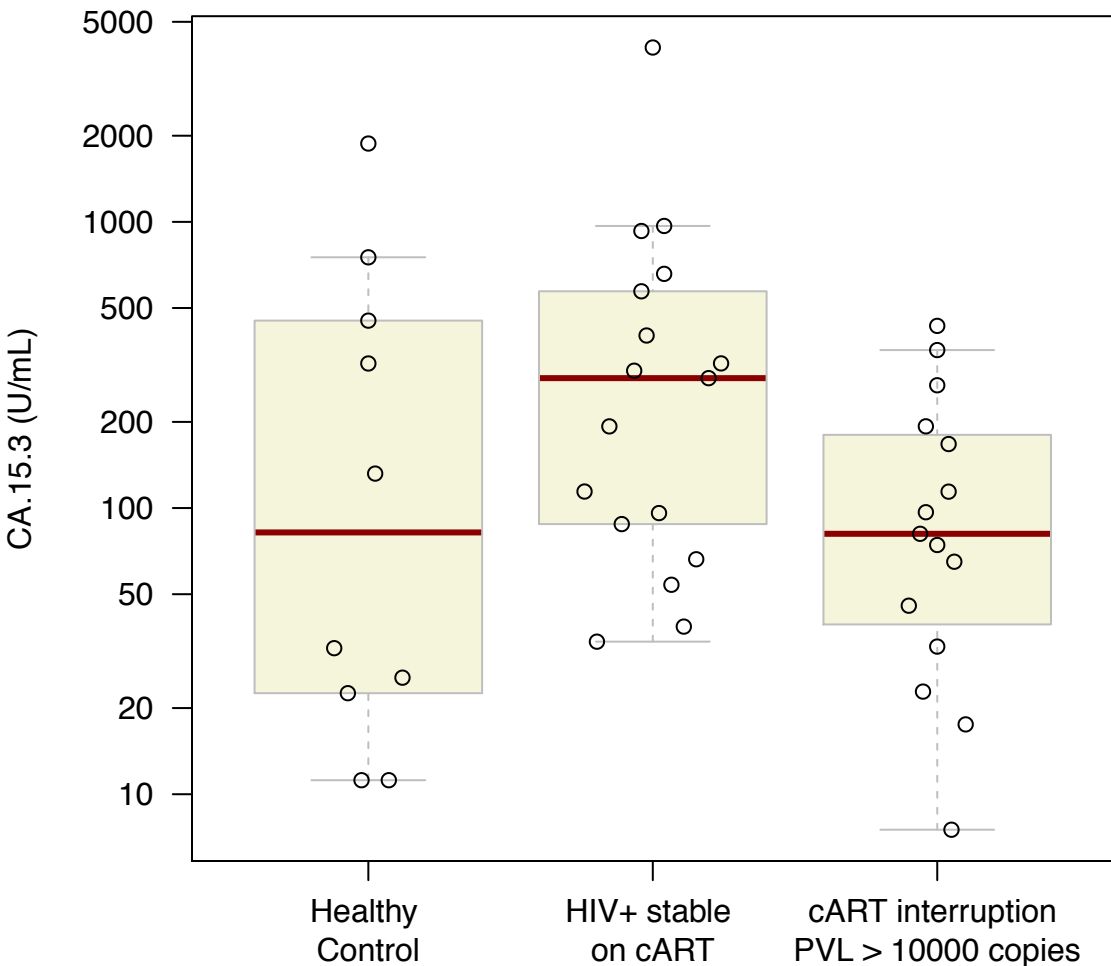

LLOQ: 0.45 U/mL



# Cancer Antigen 19-9 (CA-19-9)

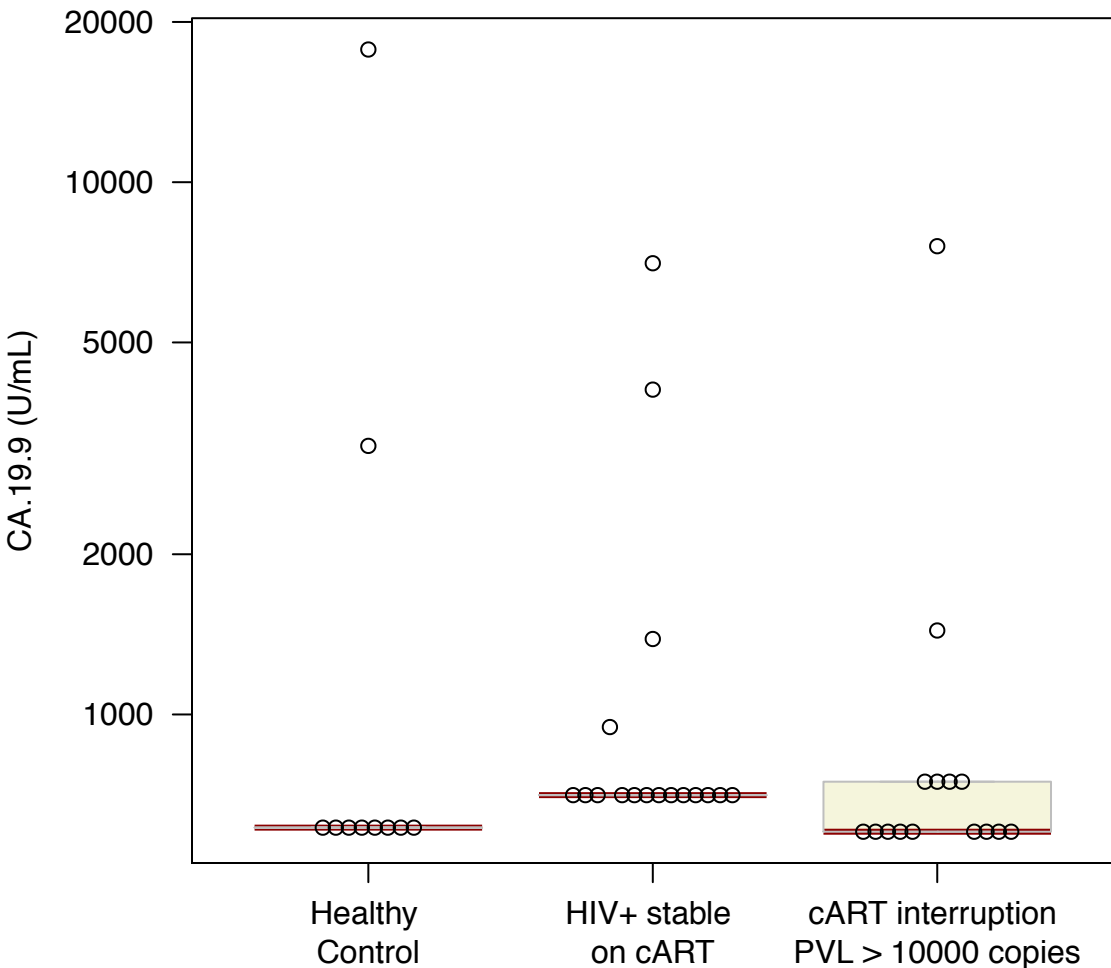

LLOQ: 7 U/mL



# Carcinoembryonic Antigen (CEA)

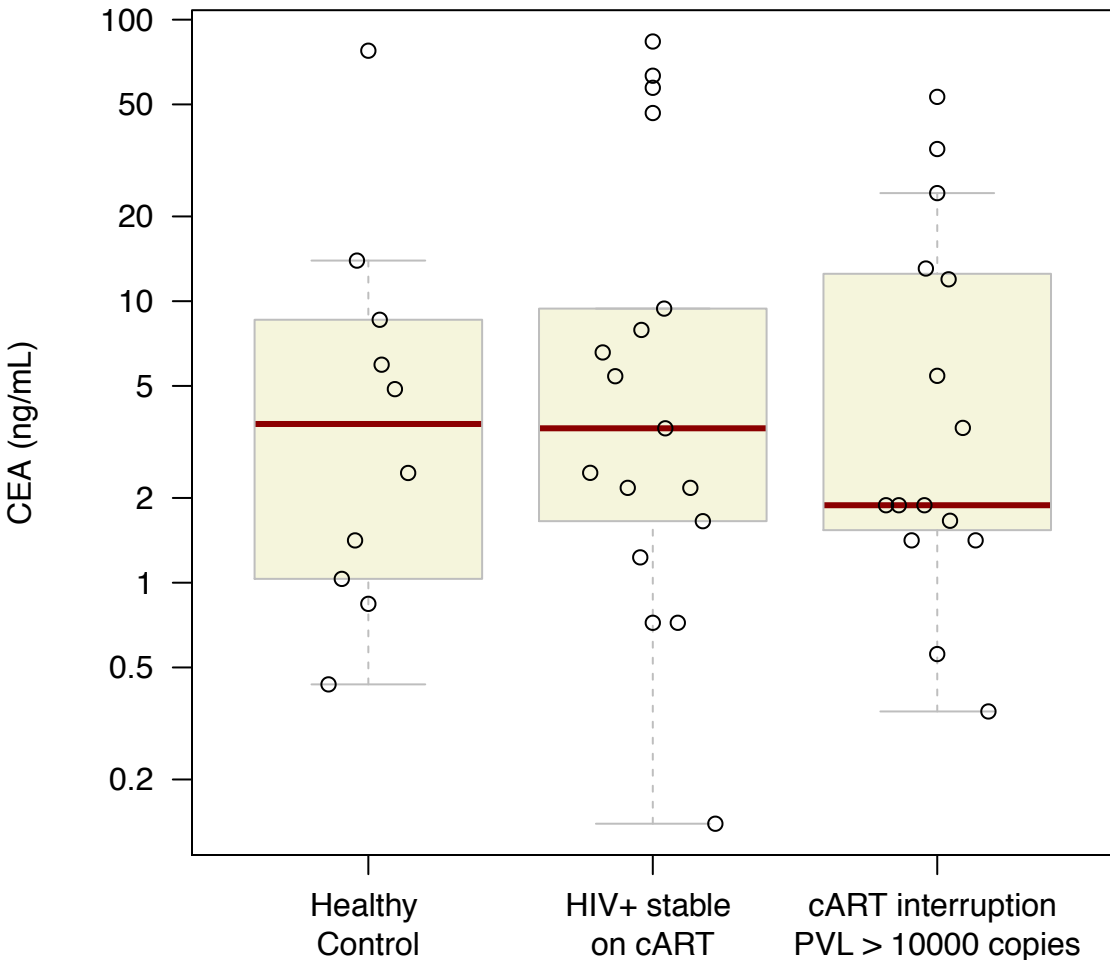

LLOQ: 0.19 ng/mL

# Cathepsin D

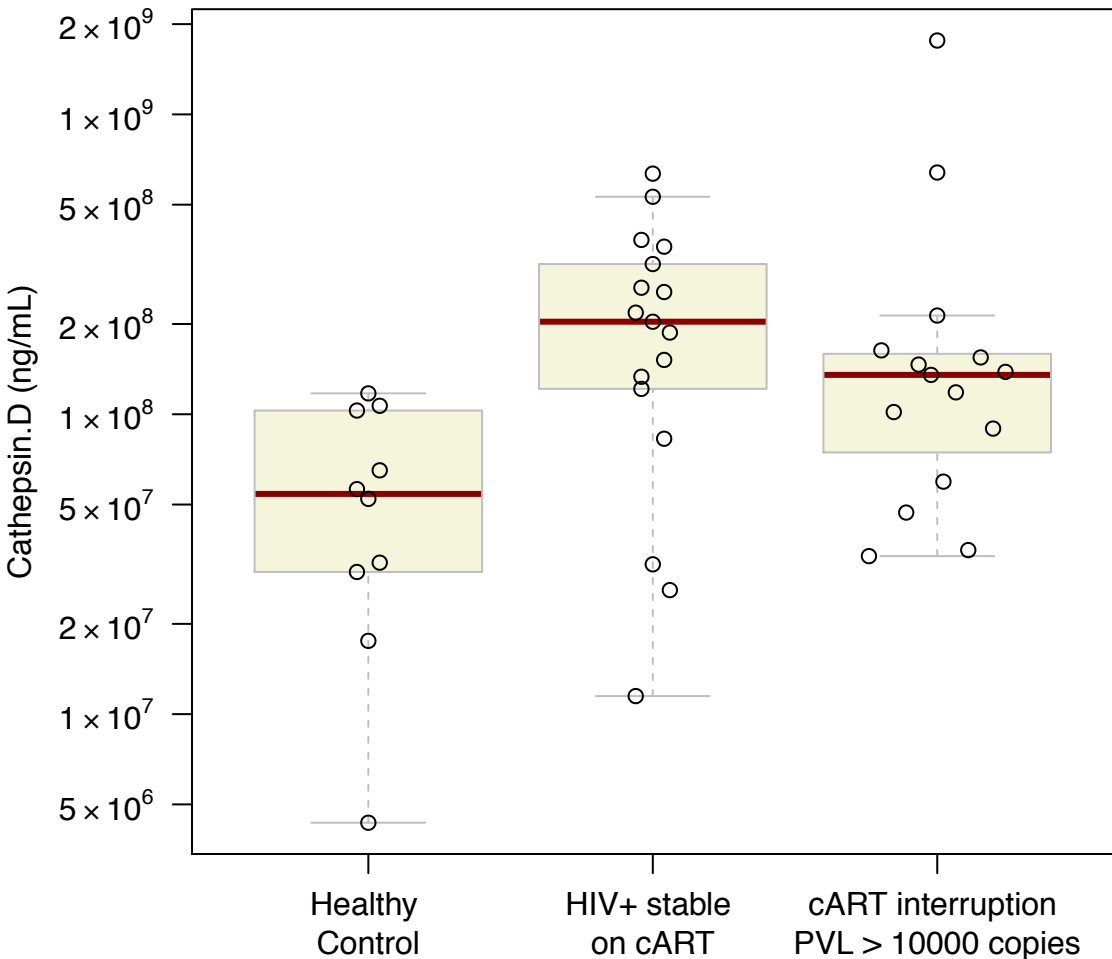

LLOQ: 88 ng/mL

# CD5 Antigen-like (CD5L)

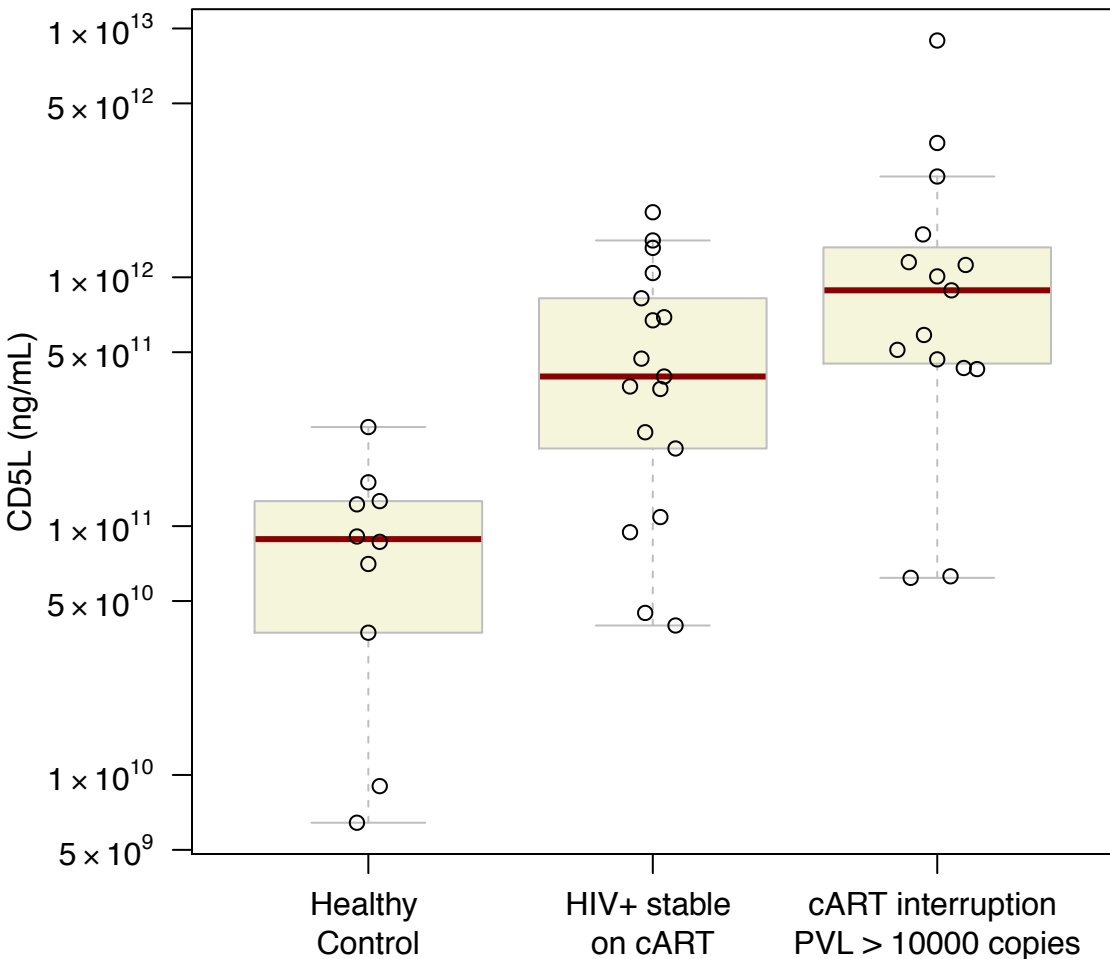

LLOQ: 161 ng/mL

# CD 40 antigen (CD40)

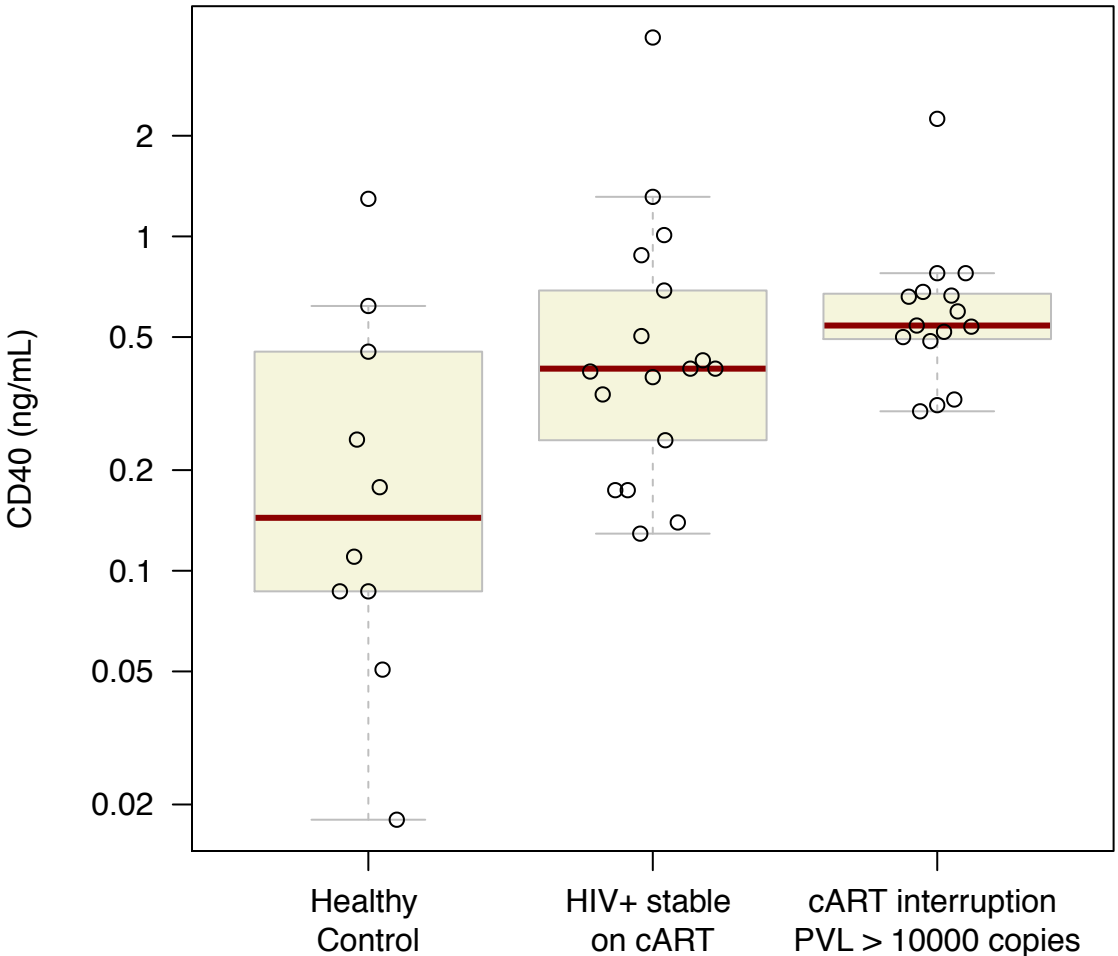

LLOQ: 0.016 ng/mL

# CD40 Ligand (CD40-L)

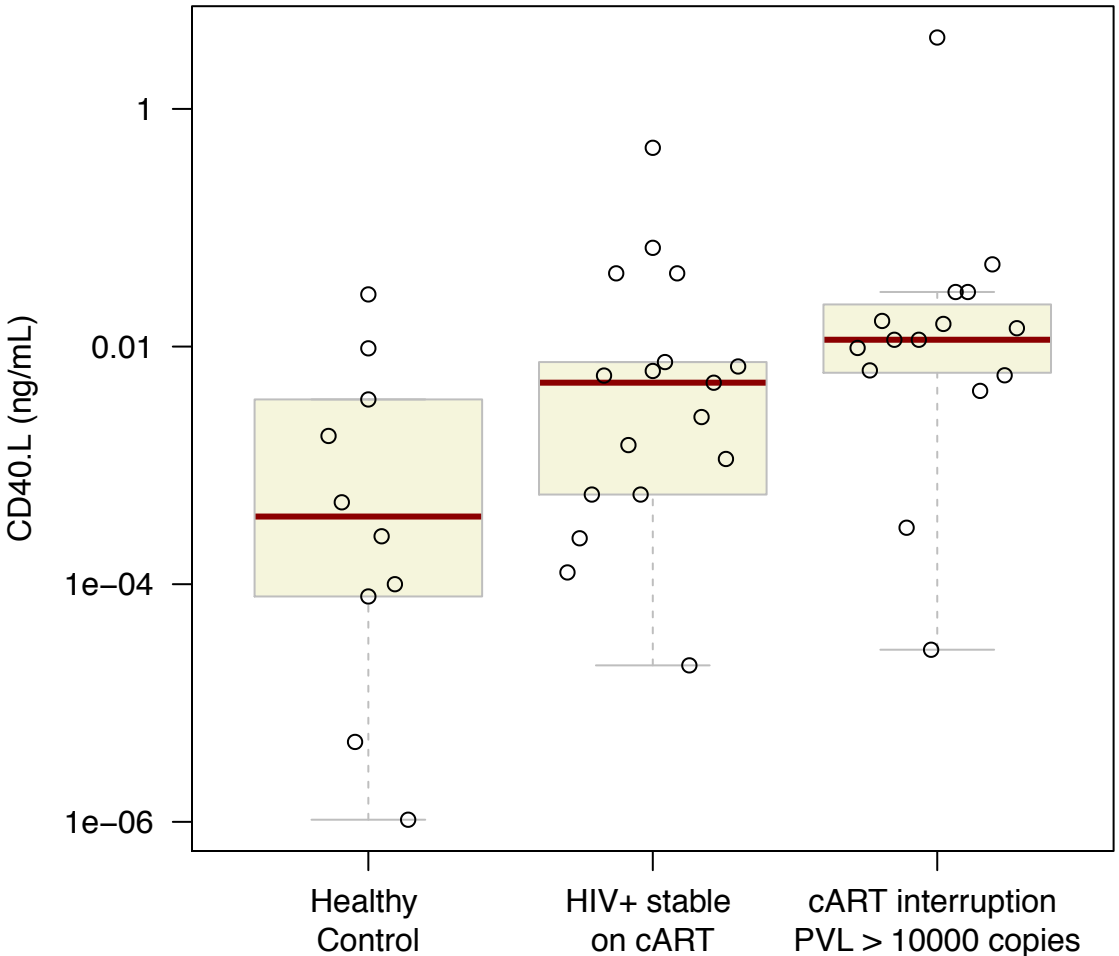

LLOQ: 0.016 ng/mL

# Cellular Fibronectin (cFib)

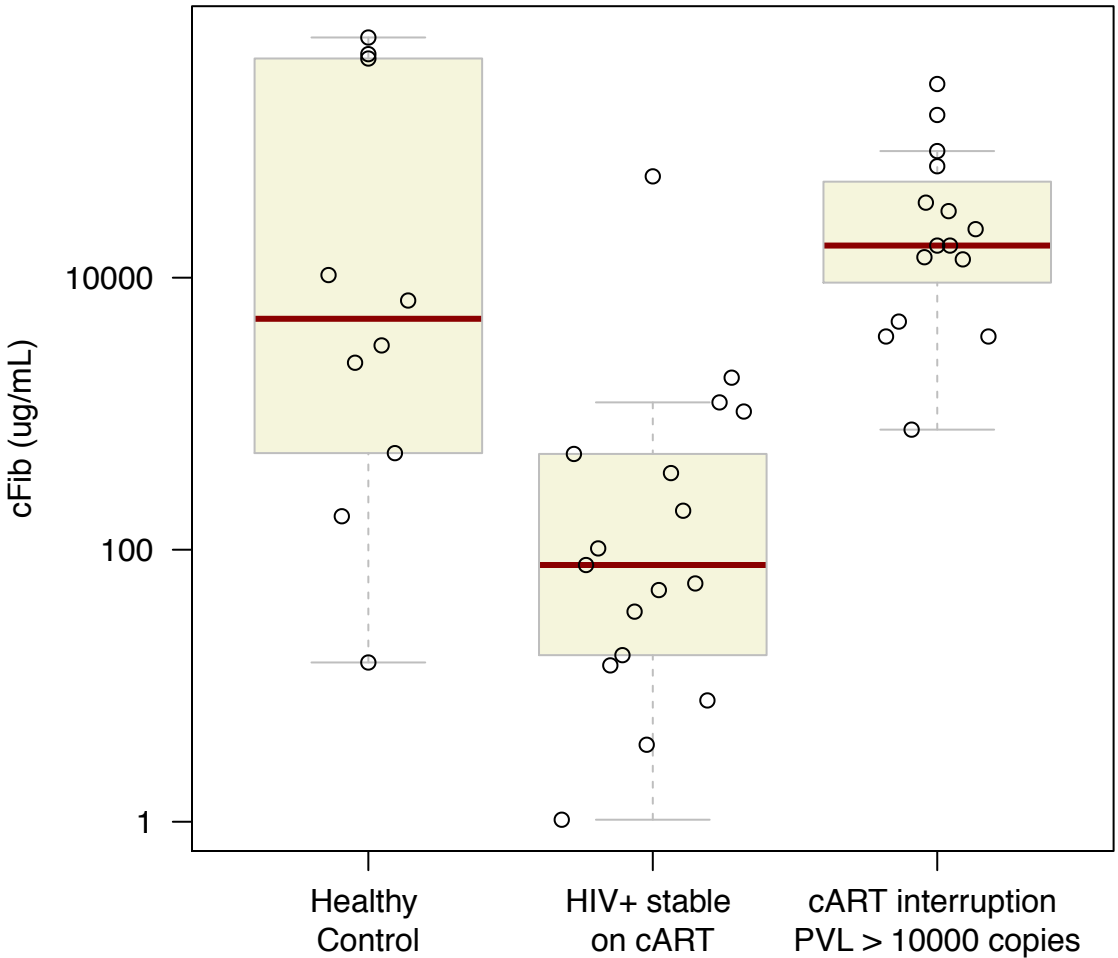

LLOQ: 0.85 ug/mL



# Chemokine CC-4 (HCC-4)

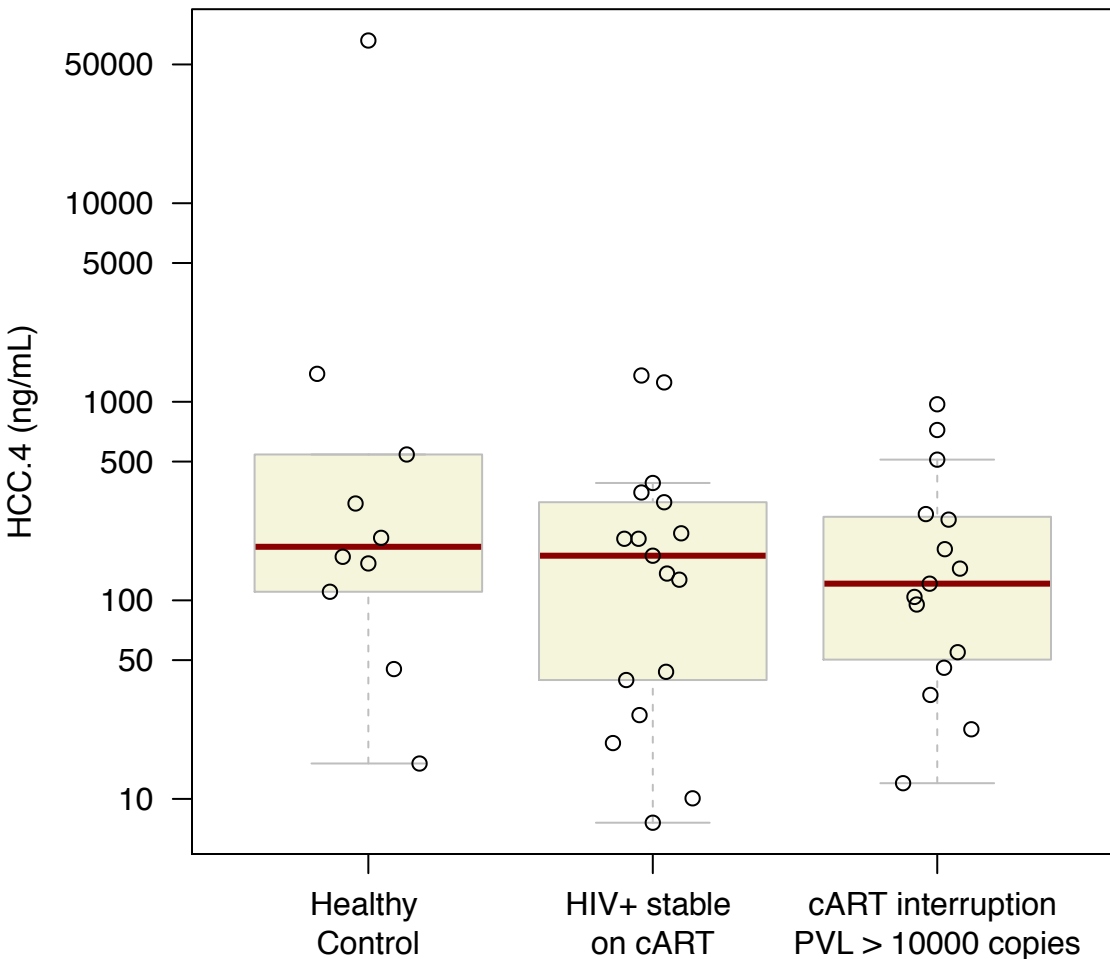

LLOQ: 0.047 ng/mL

# Chromogranin-A (CgA)

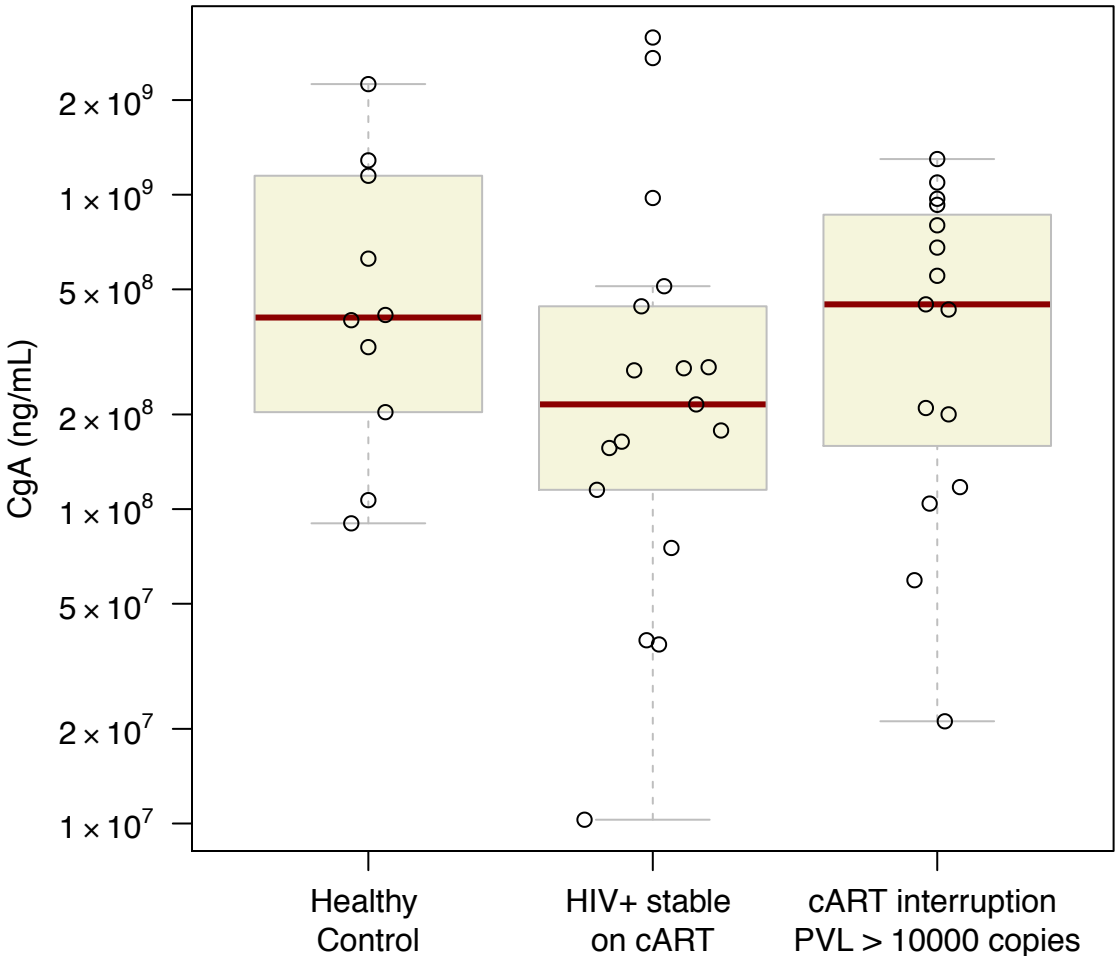

LLOQ: 13 ng/mL

# Clusterin (CLU)

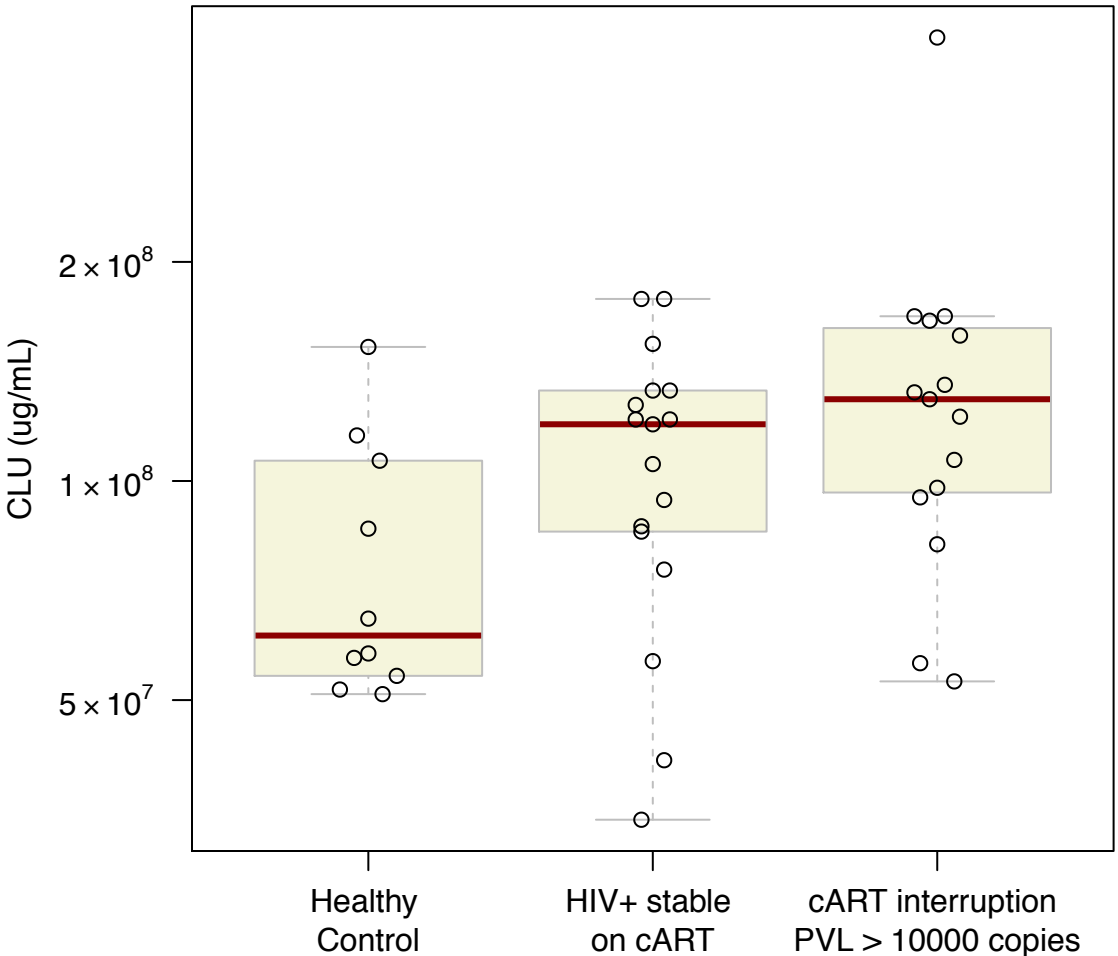

LLOQ: 4.8 ug/mL

# Collagen IV

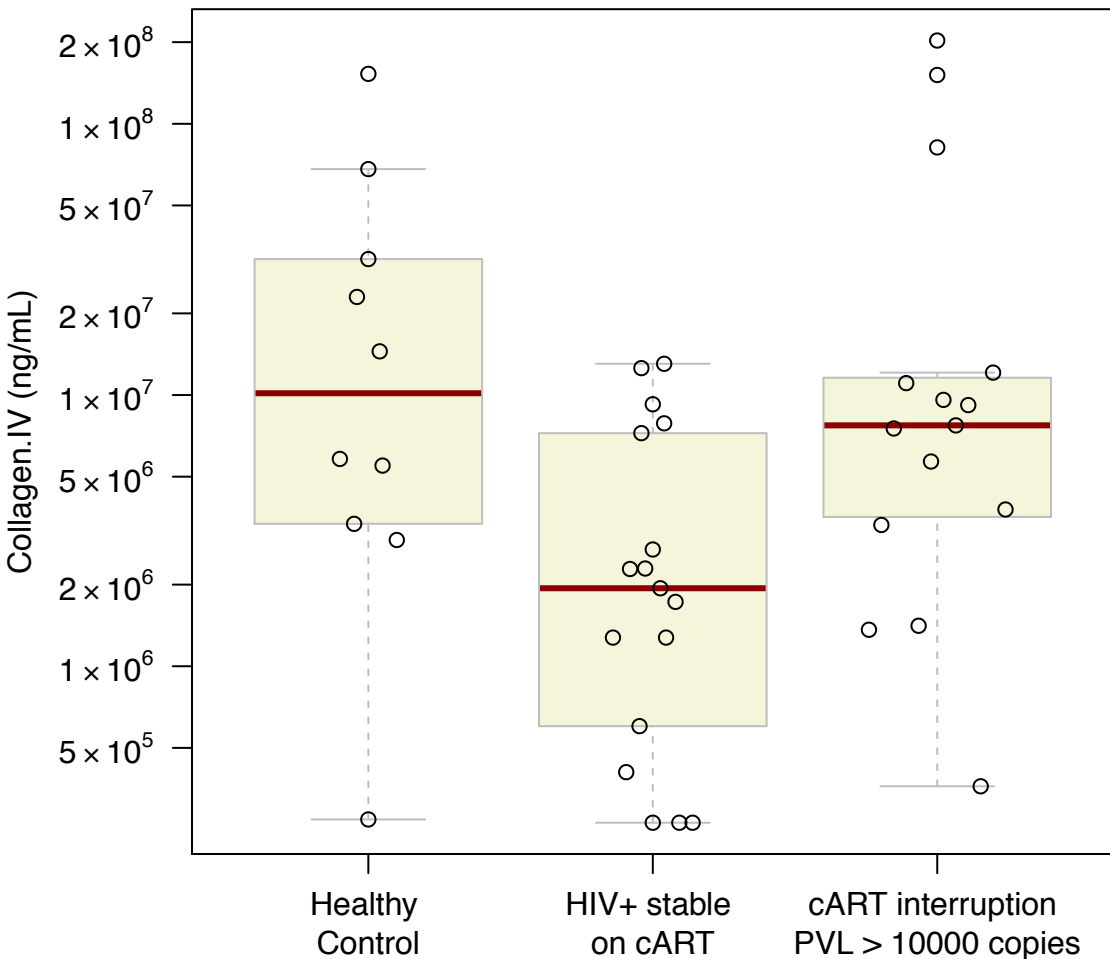

LLOQ: 9.6 ng/mL

# Complement C3 (C3)

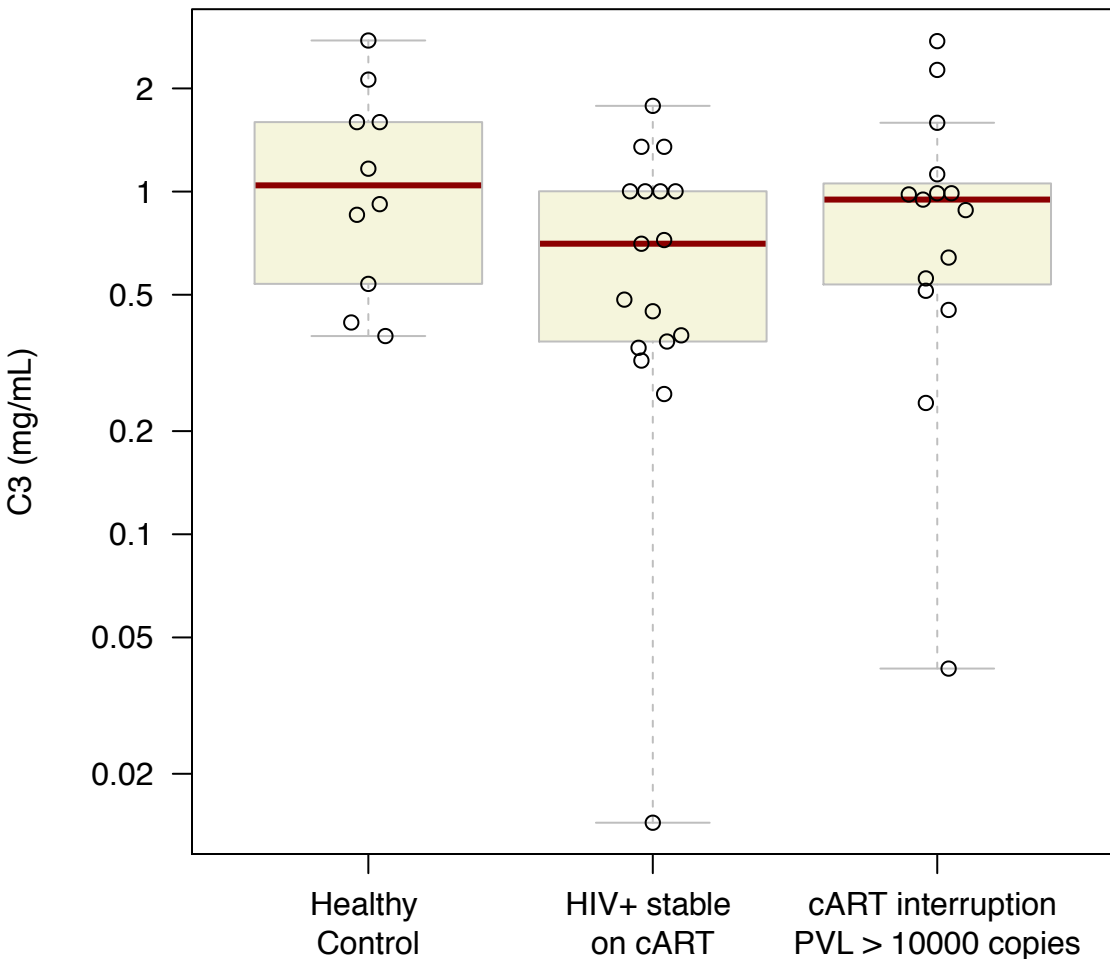

LLOQ: 0.02 mg/mL

# Complement Factor H ... Related Protein 1 (CFHR1)

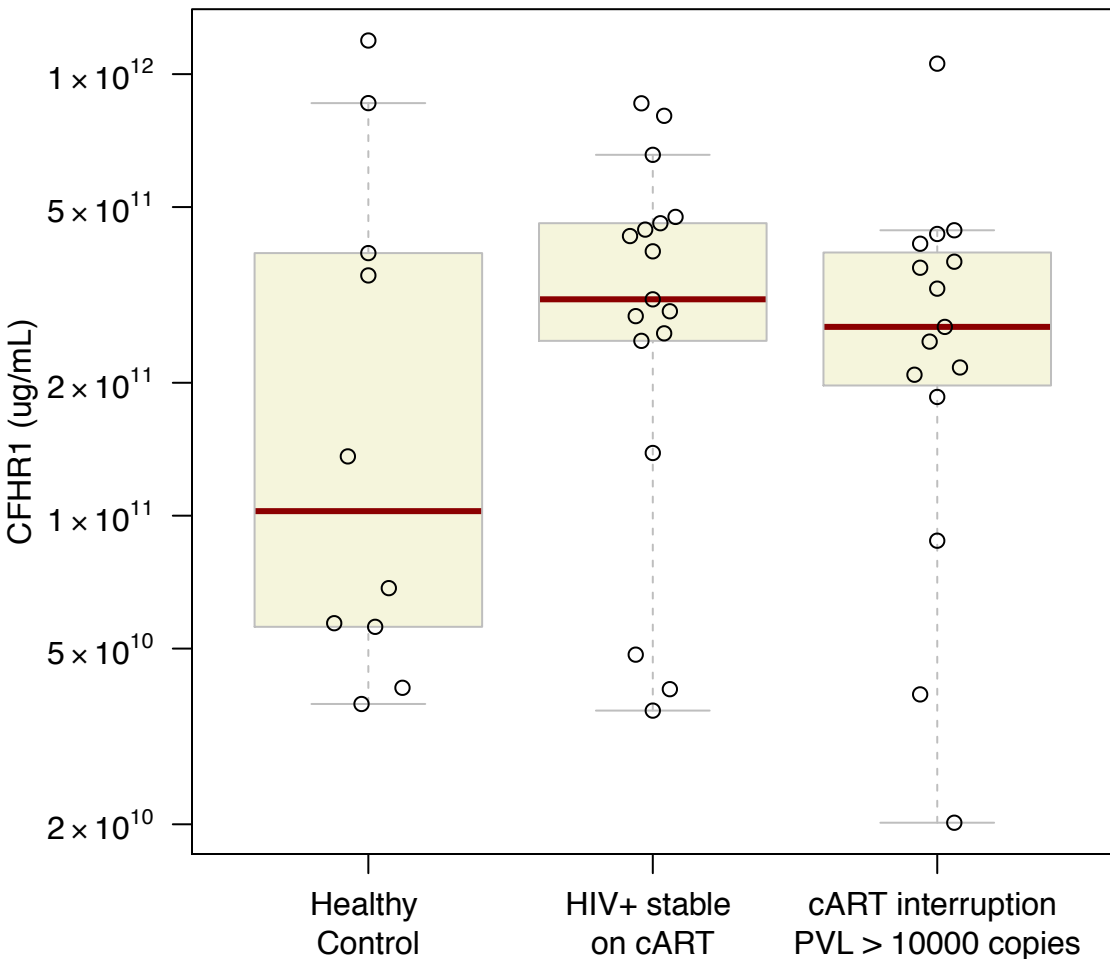

# Cortisol (Cortisol)

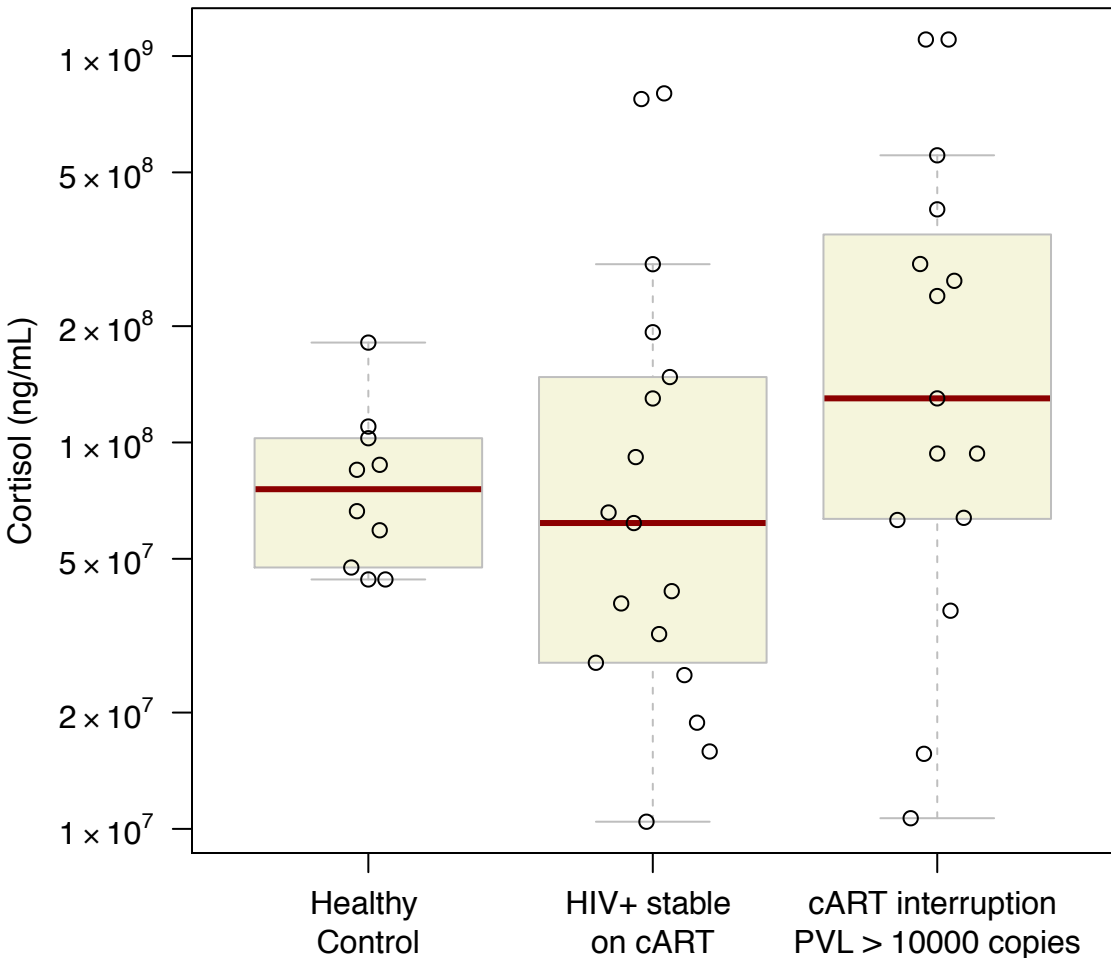

LLOQ: 20 ng/mL

# Creatine Kinase-MB (CK-MB)

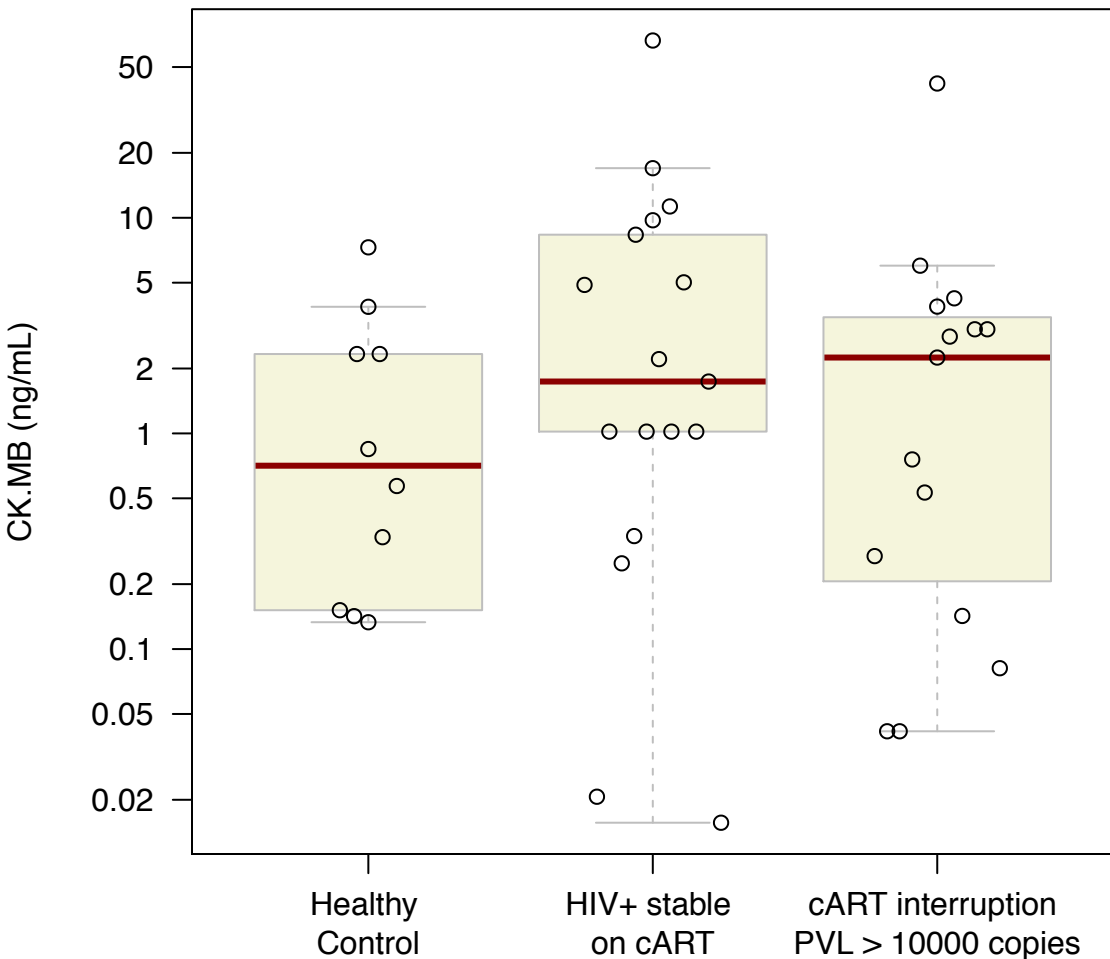

LLOQ: 0.35 ng/mL



# Cystatin-C

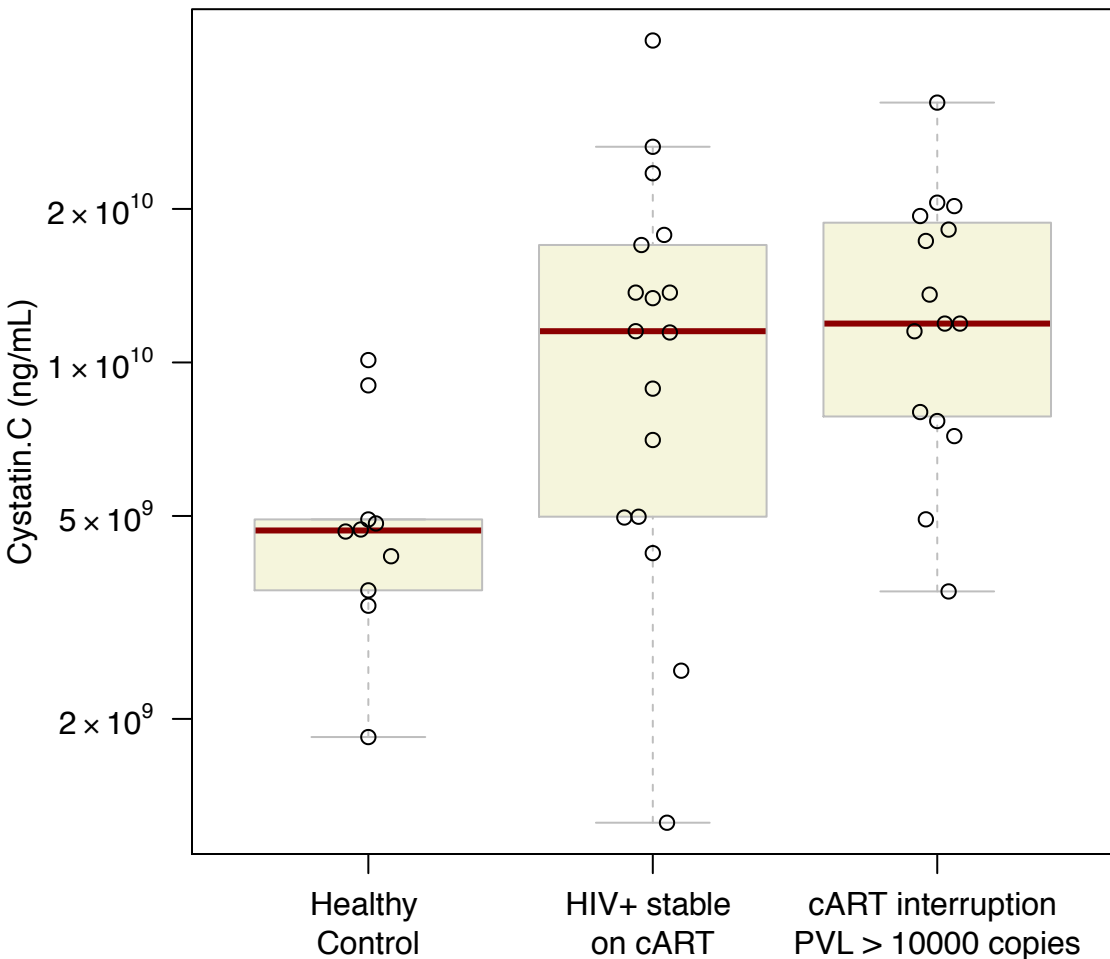

LLOQ: 37 ng/mL

# E-Selectin

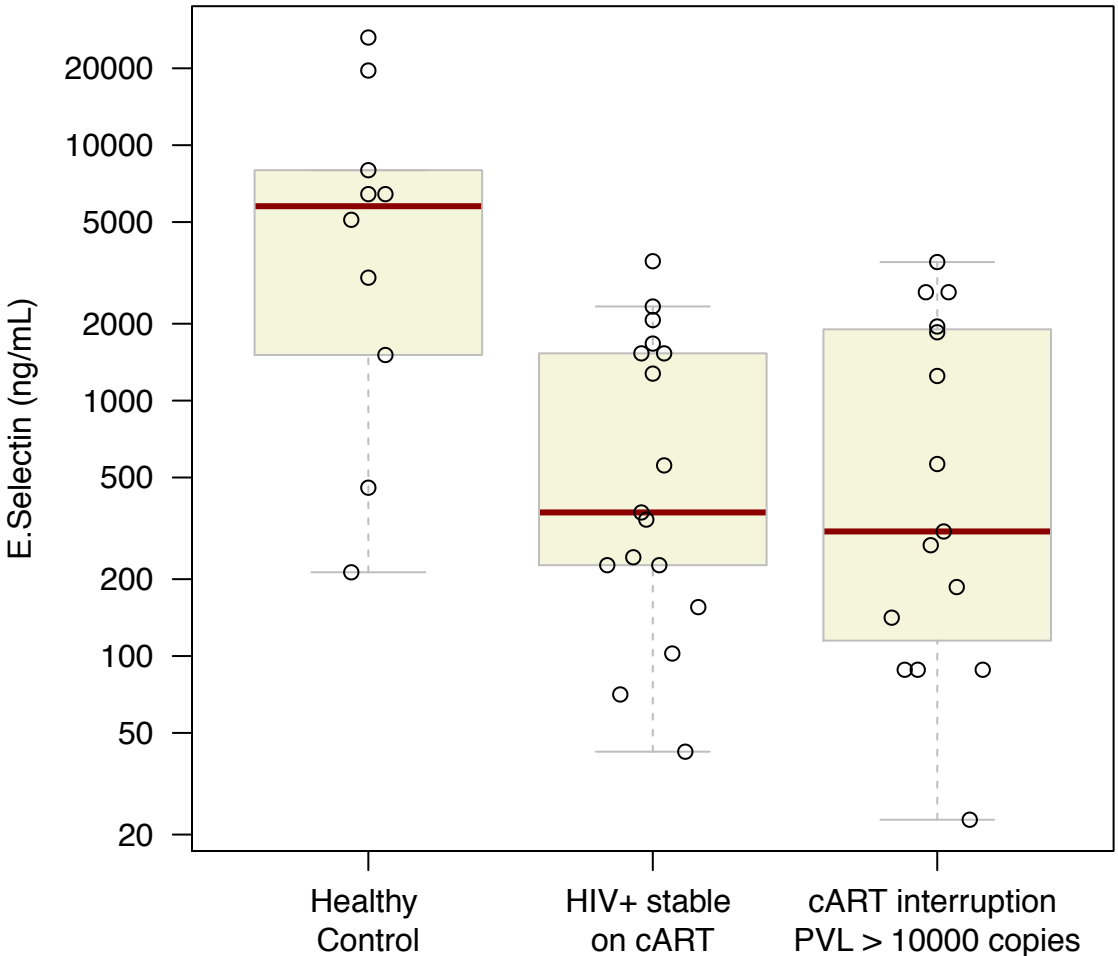

LLOQ: 0.21 ng/mL

# EN-RAGE

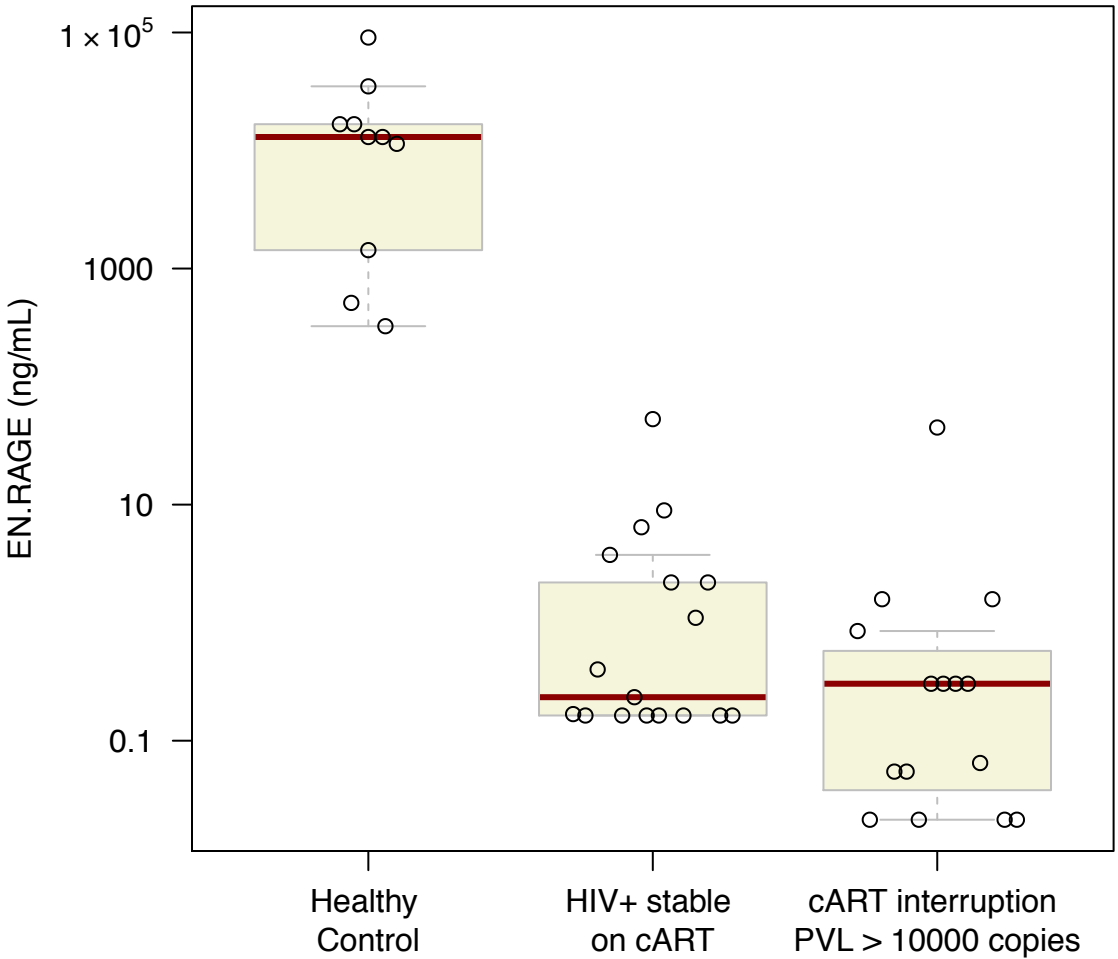

# Endoglin

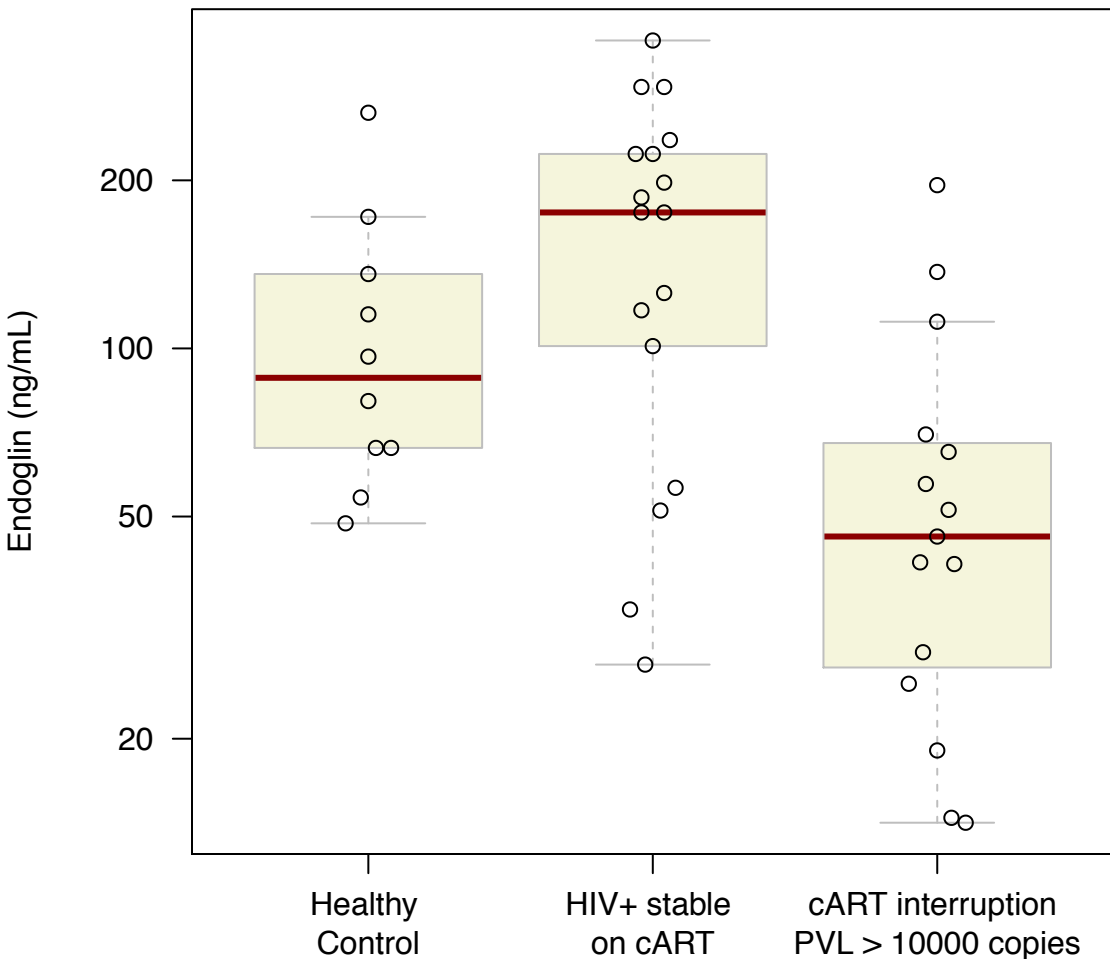

LLOQ: 0.02 ng/mL

# Endostatin

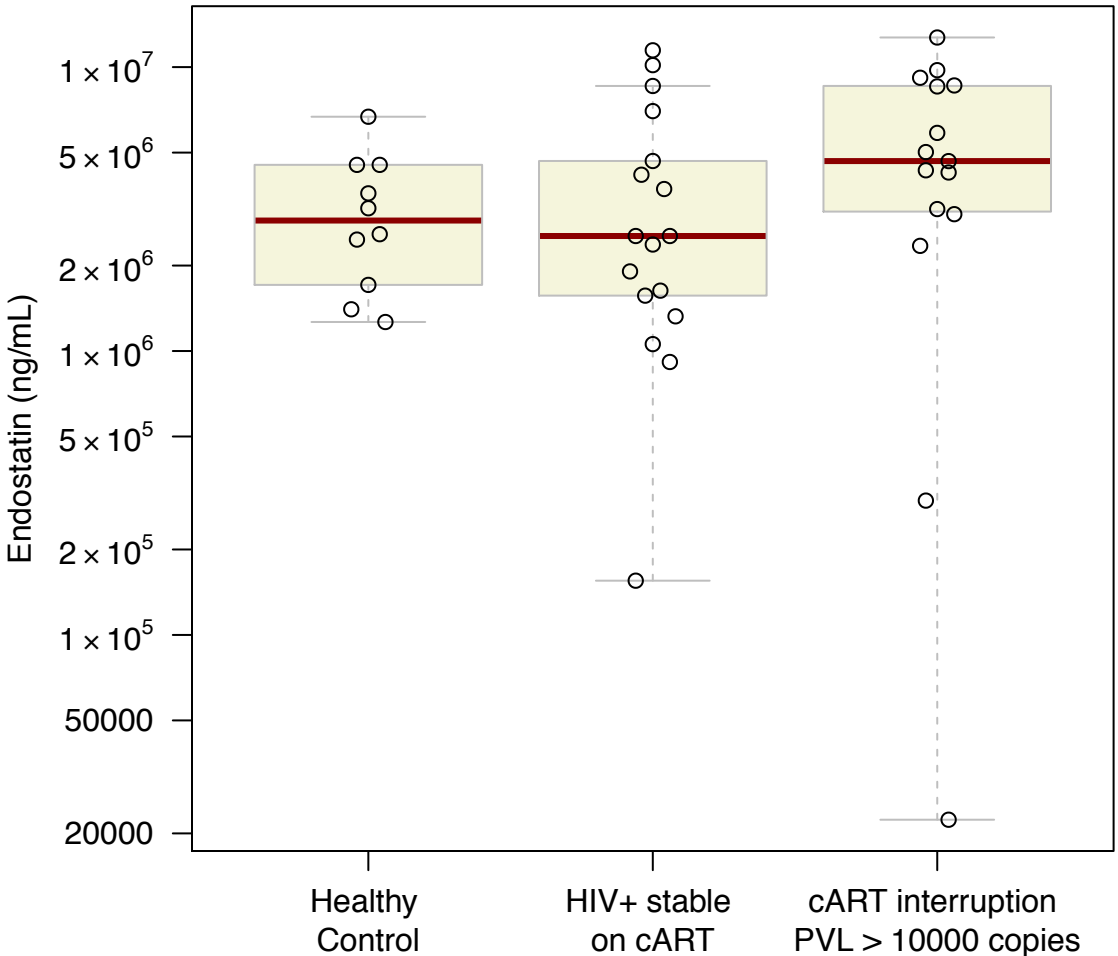

# Eotaxin-1

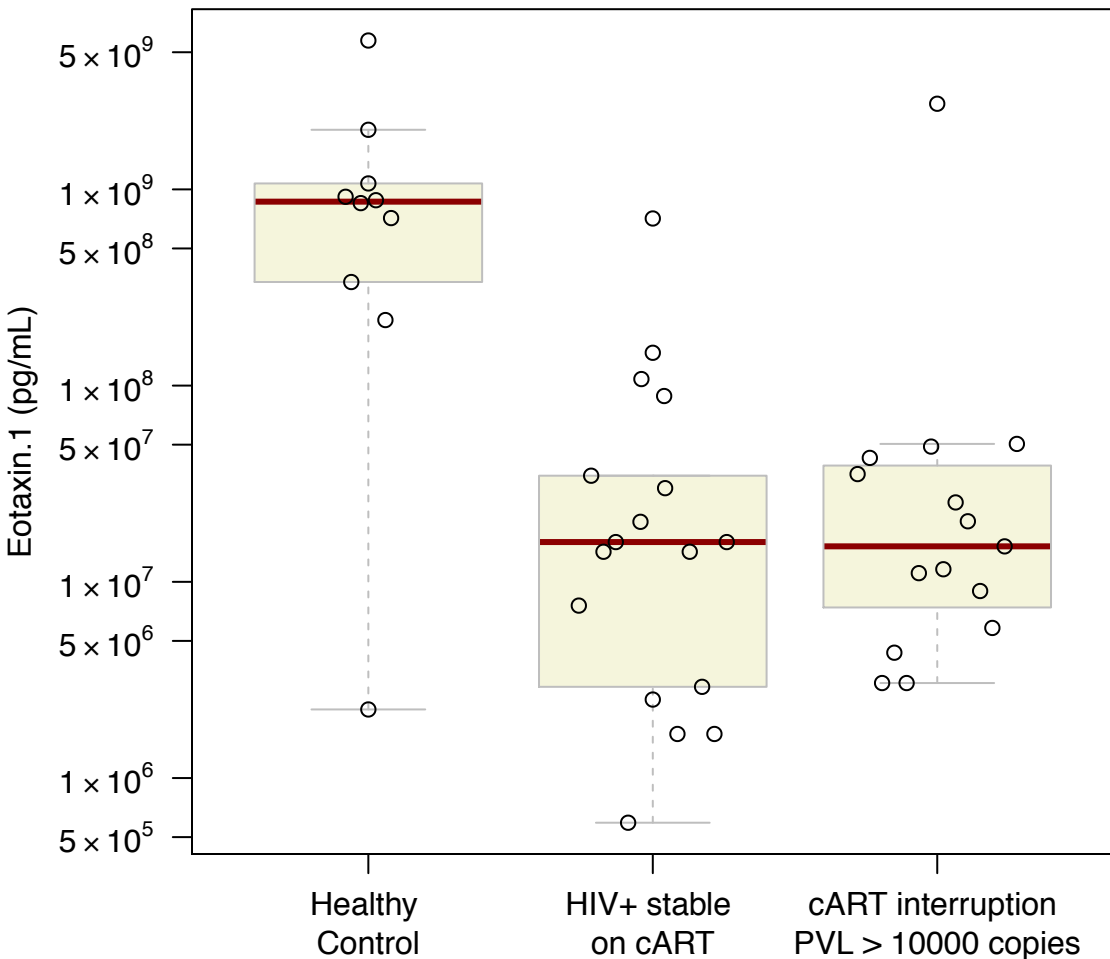

LLOQ: 53 pg/mL

# Eotaxin-2

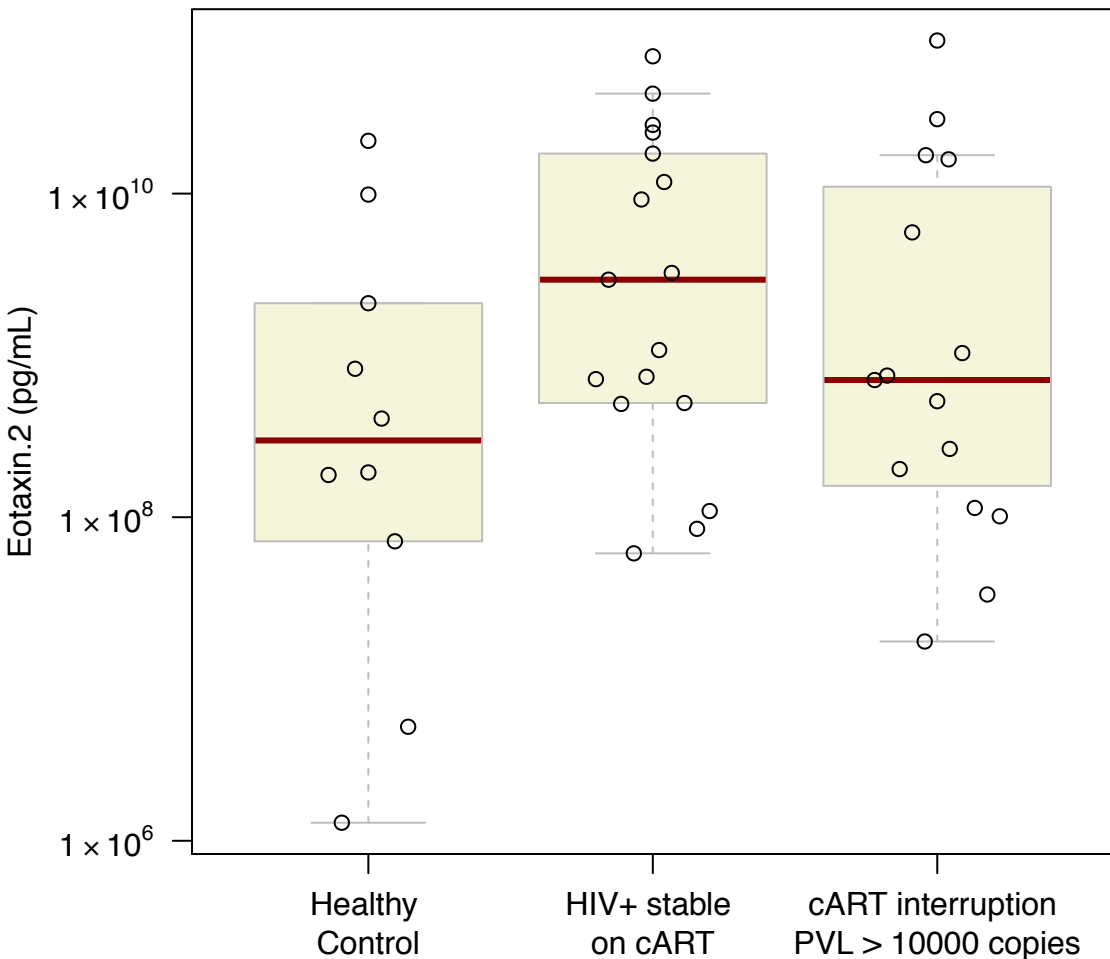

LLOQ: 50 pg/mL

# Eotaxin-3

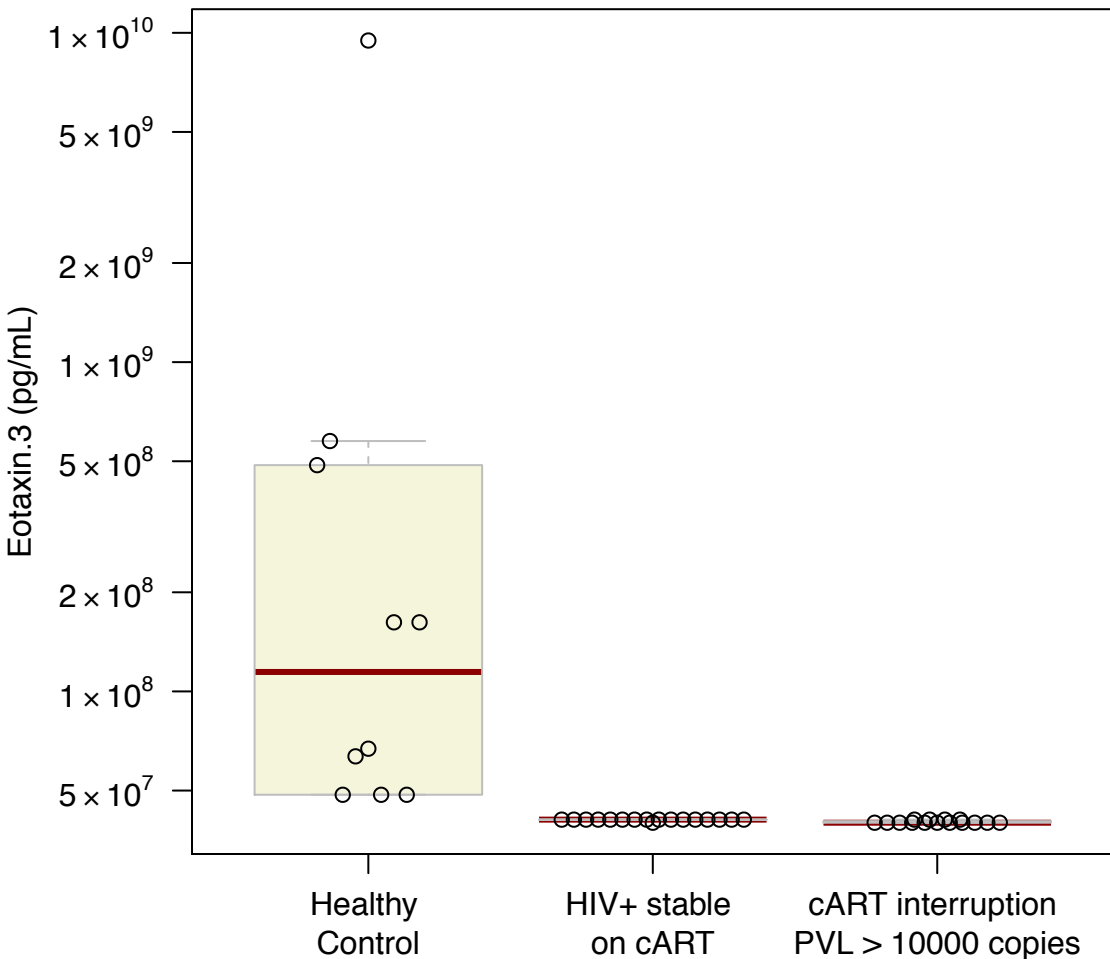

LLOQ: 195 pg/mL



# Epidermal Growth Factor (EGF)

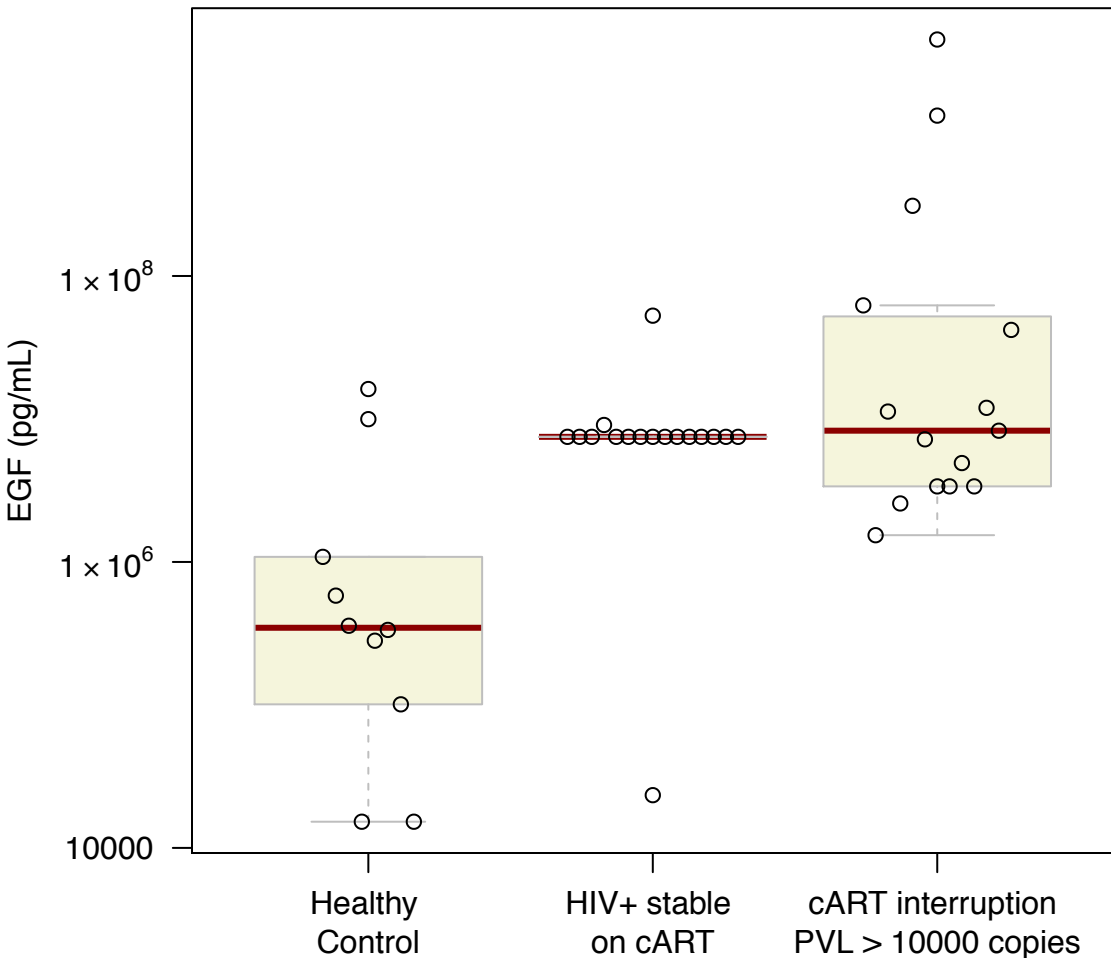

LLOQ: 29 pg/mL

# Epidermal Growth Factor Receptor (EGFR)

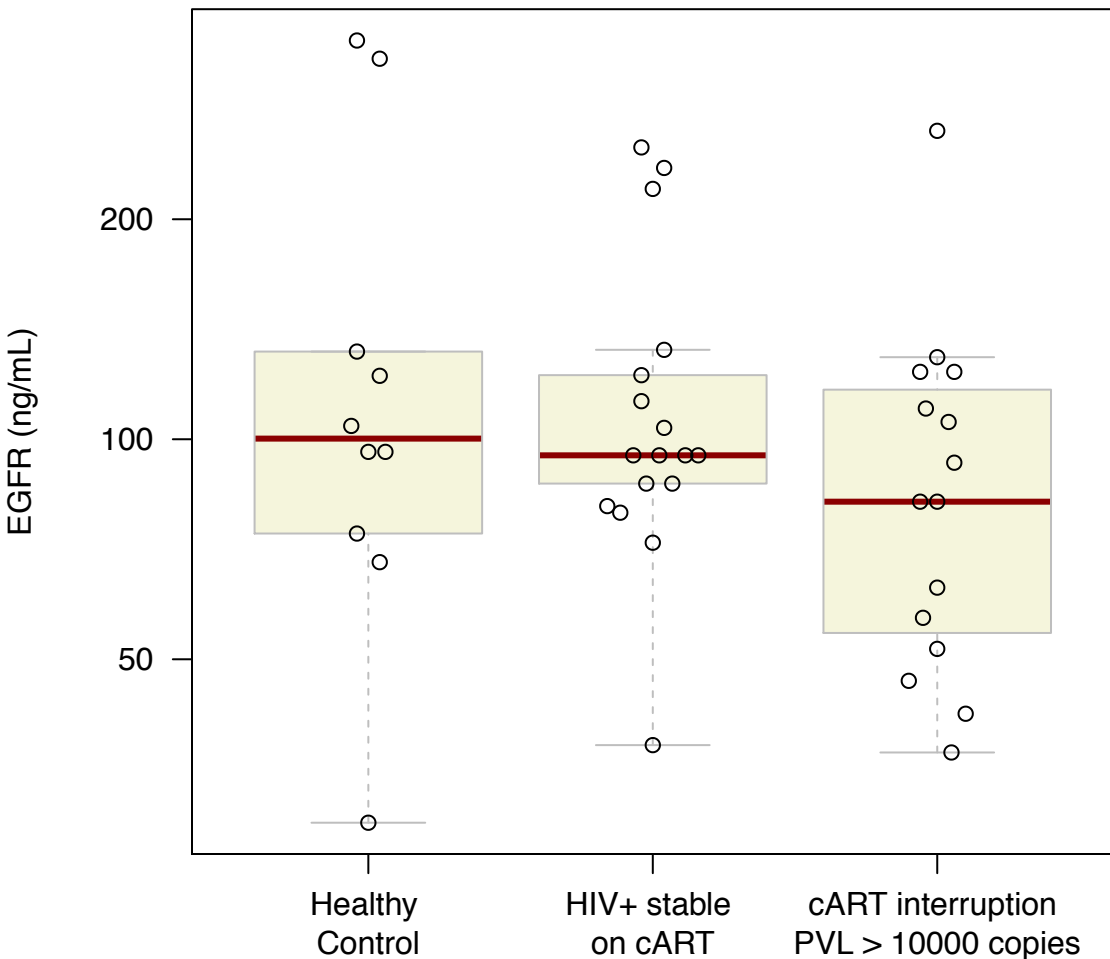

LLOQ: 0.29 ng/mL



# Ezrin

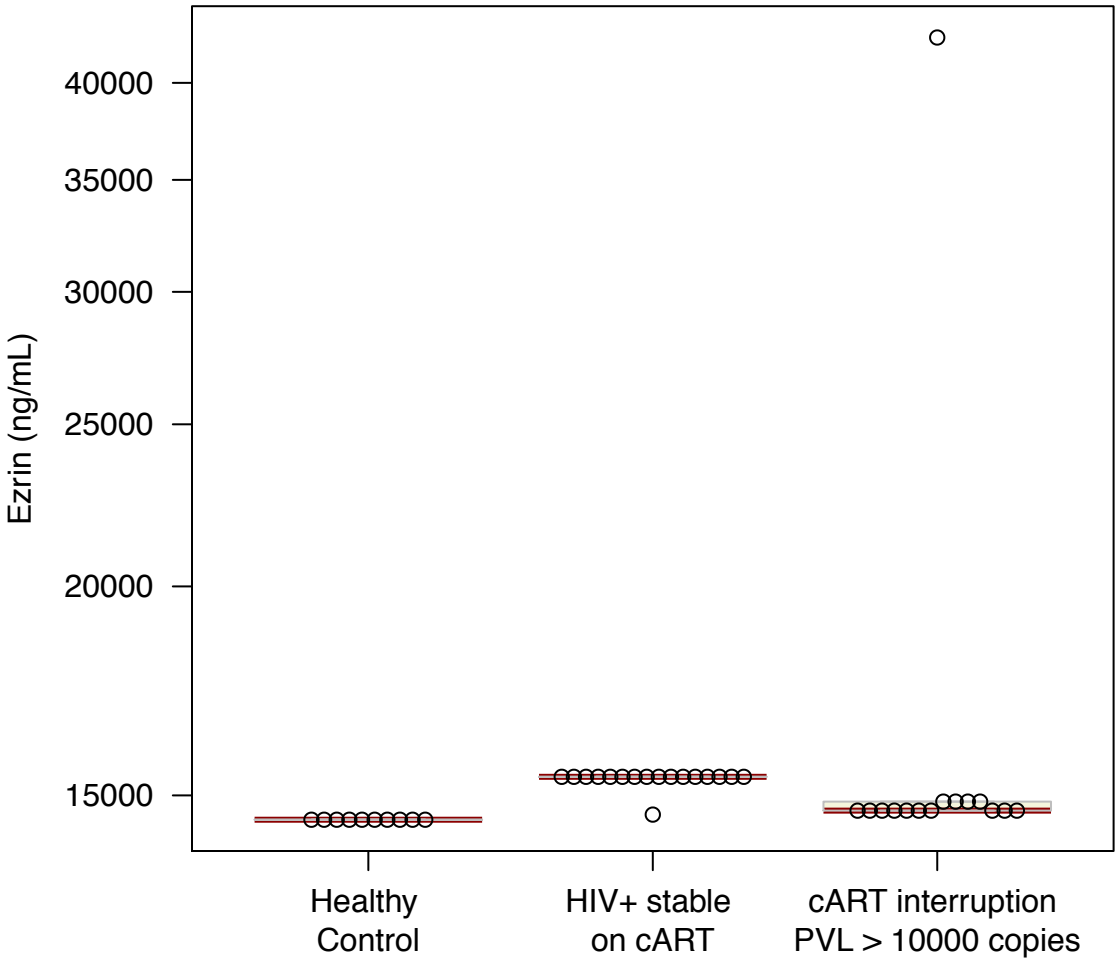

LLOQ: 18 ng/mL

# Factor VII

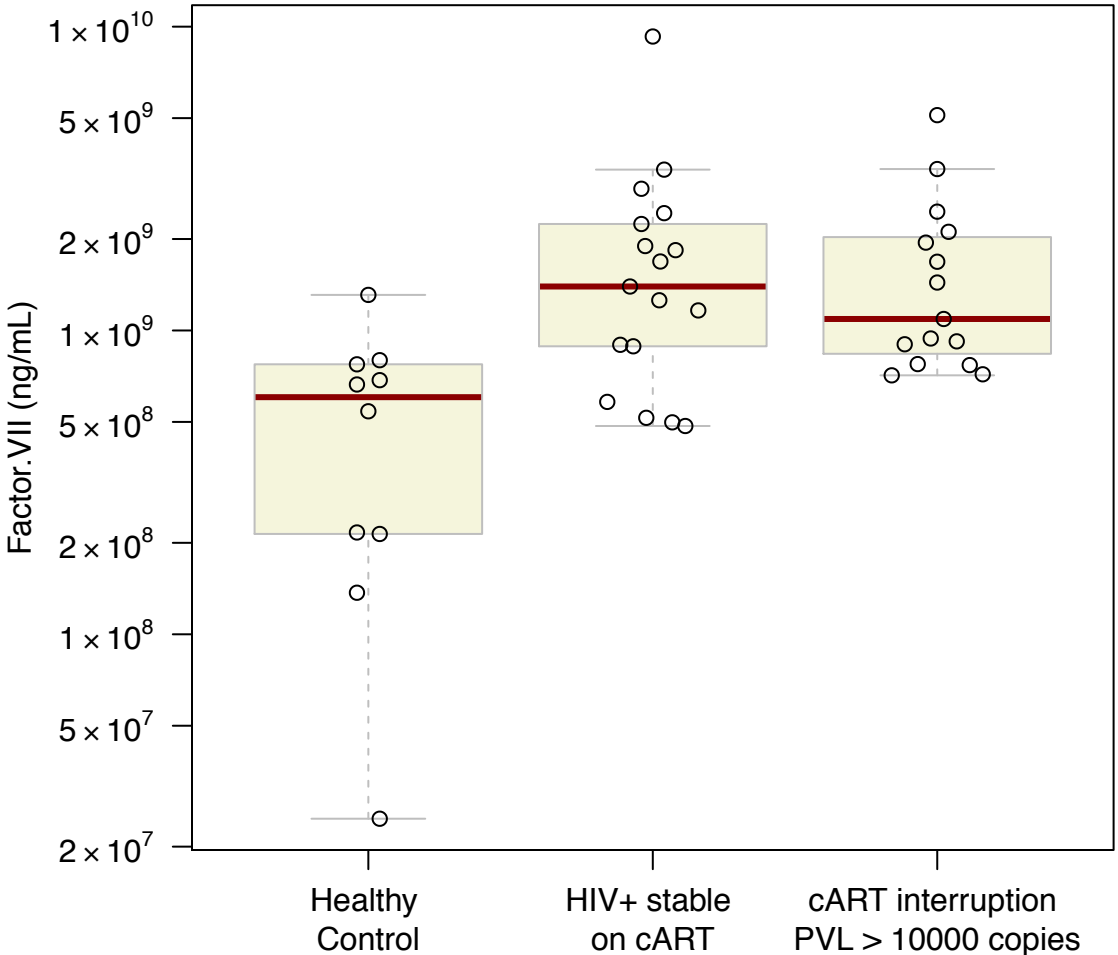

LLOQ: 3.4 ng/mL

# Fas Ligand (FasL)

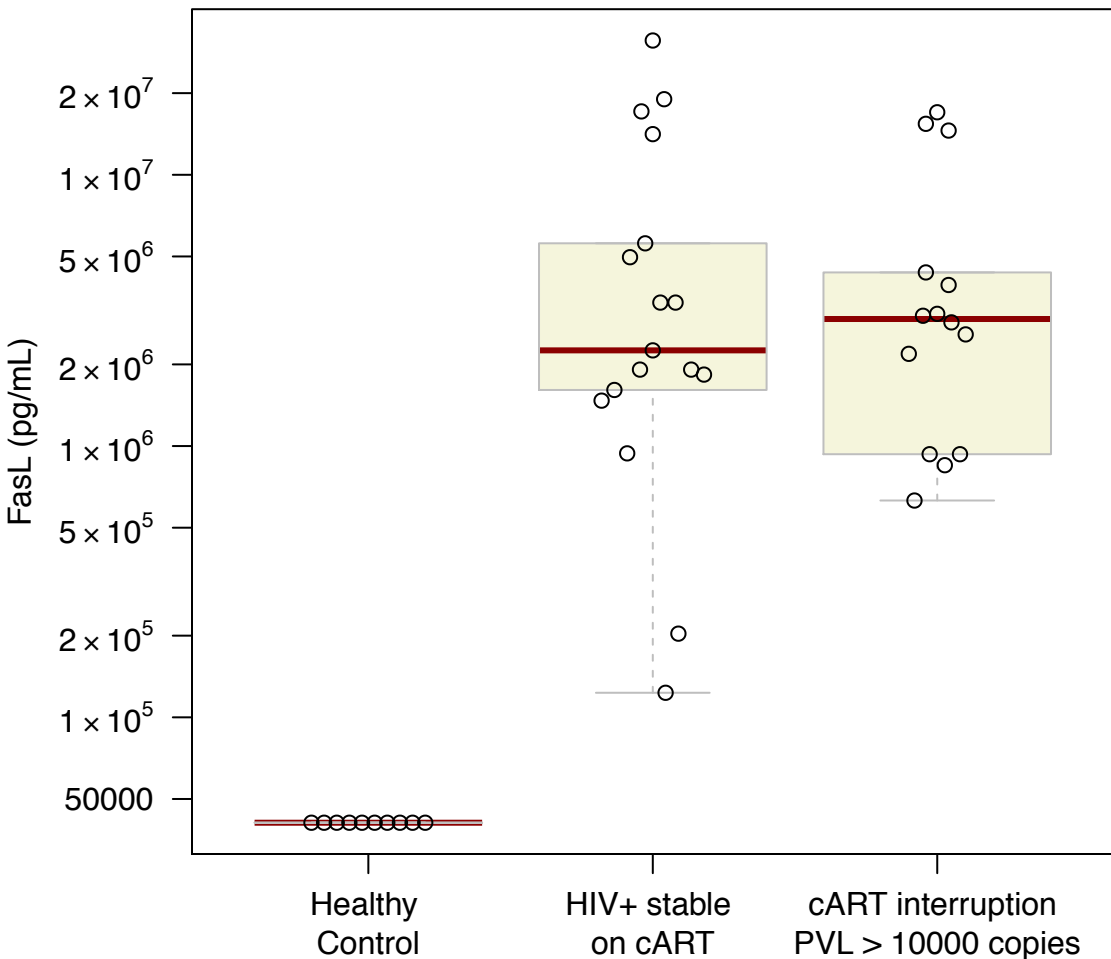

LLOQ: 26 pg/mL

# FASLG Receptor (FAS)

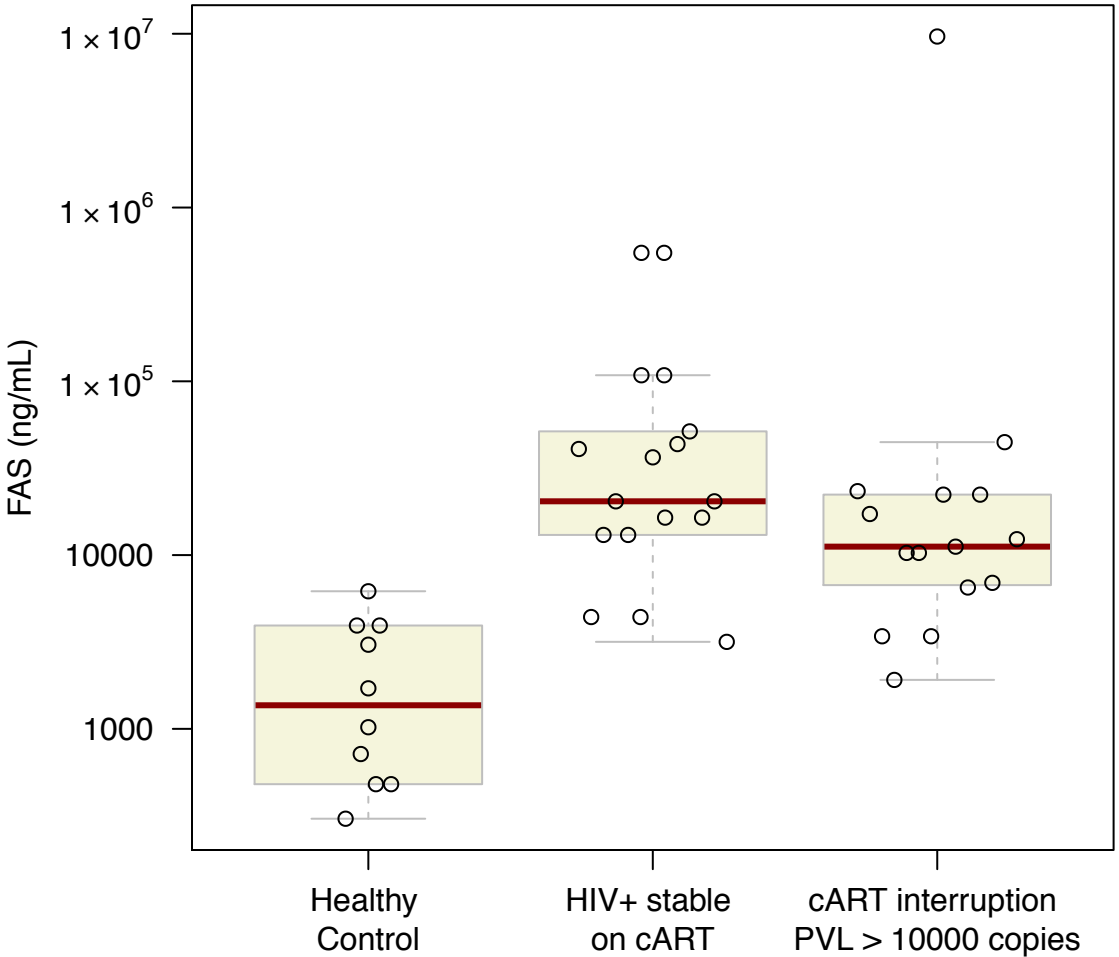

LLOQ: 5.8 ng/mL

# Fatty Acid–Binding Protein, adipocyte (FABP, adipocyte)

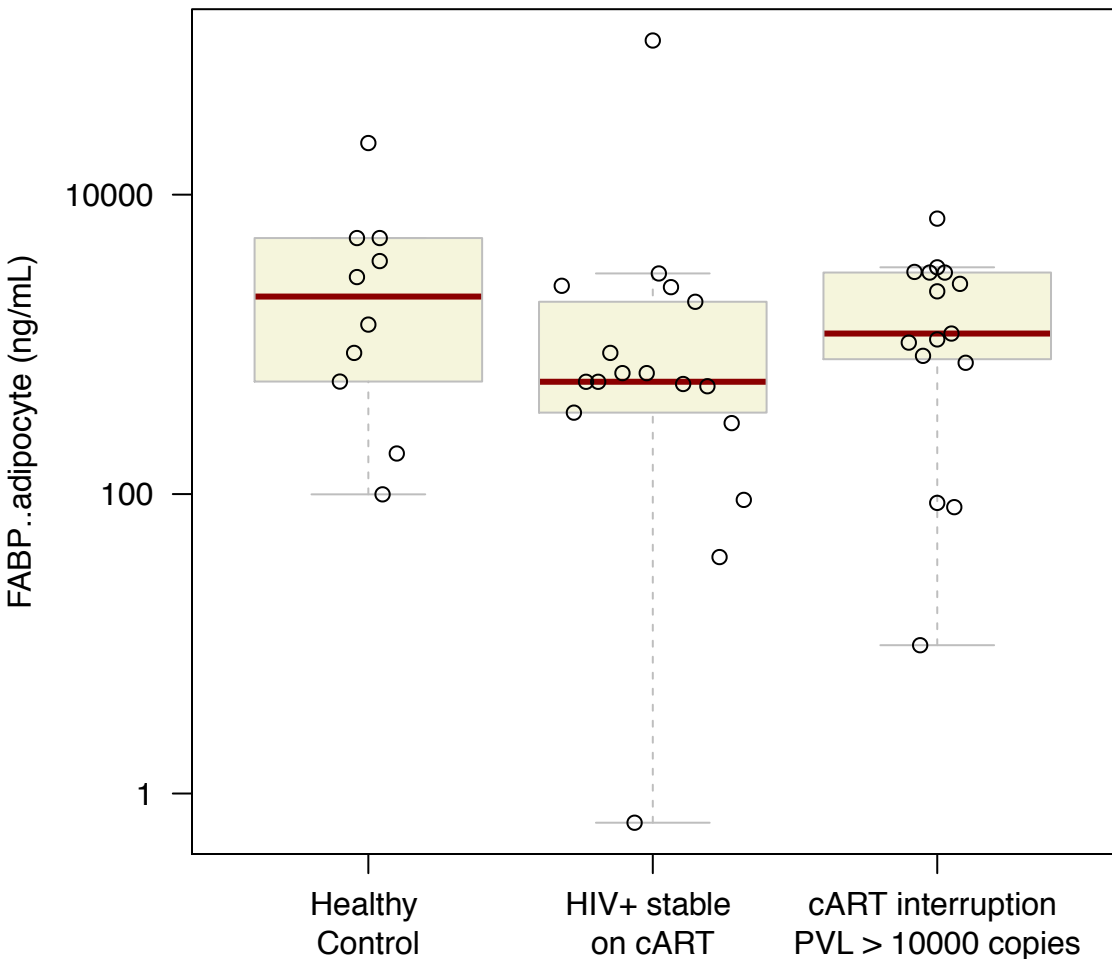

LLOQ: 0.24 ng/mL



# Ferritin (FRTN)

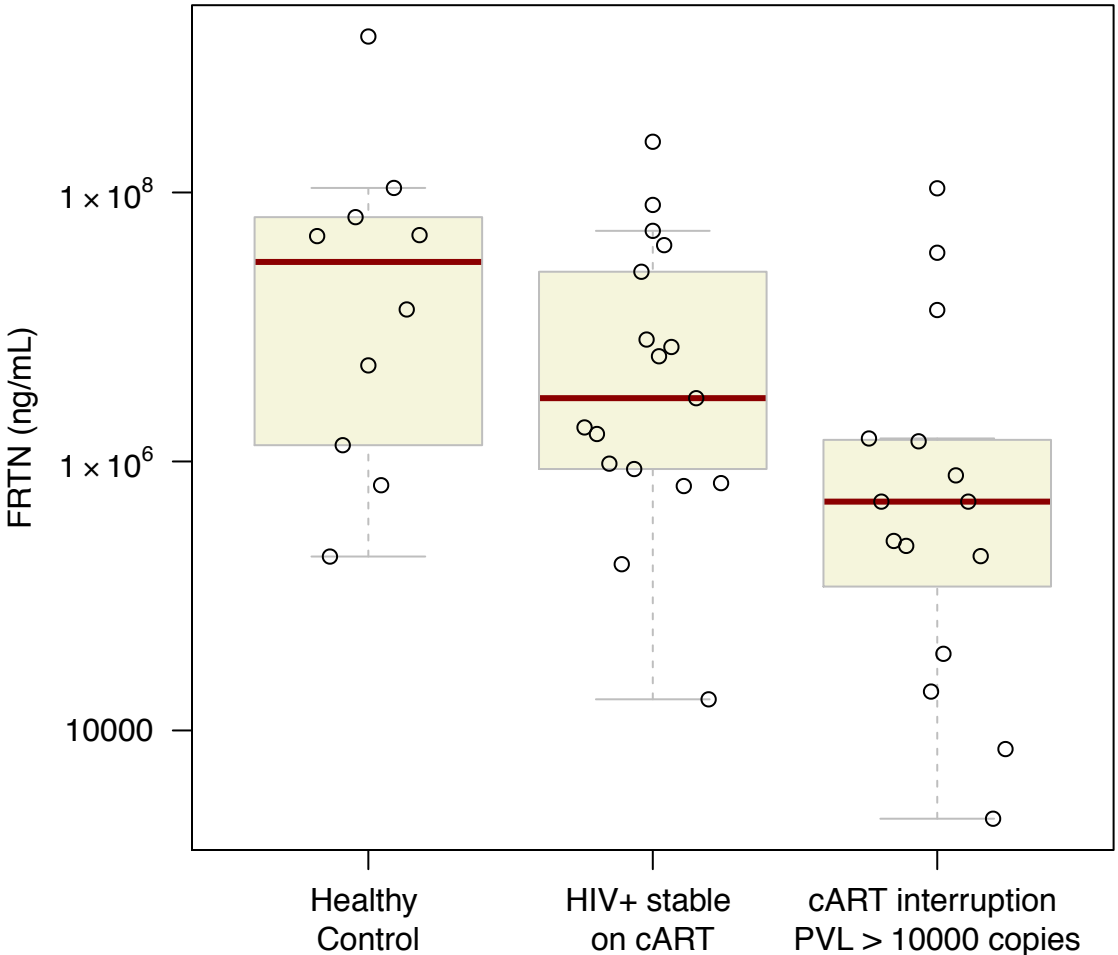

LLOQ: 4.3 ng/mL

# Fetuin-A

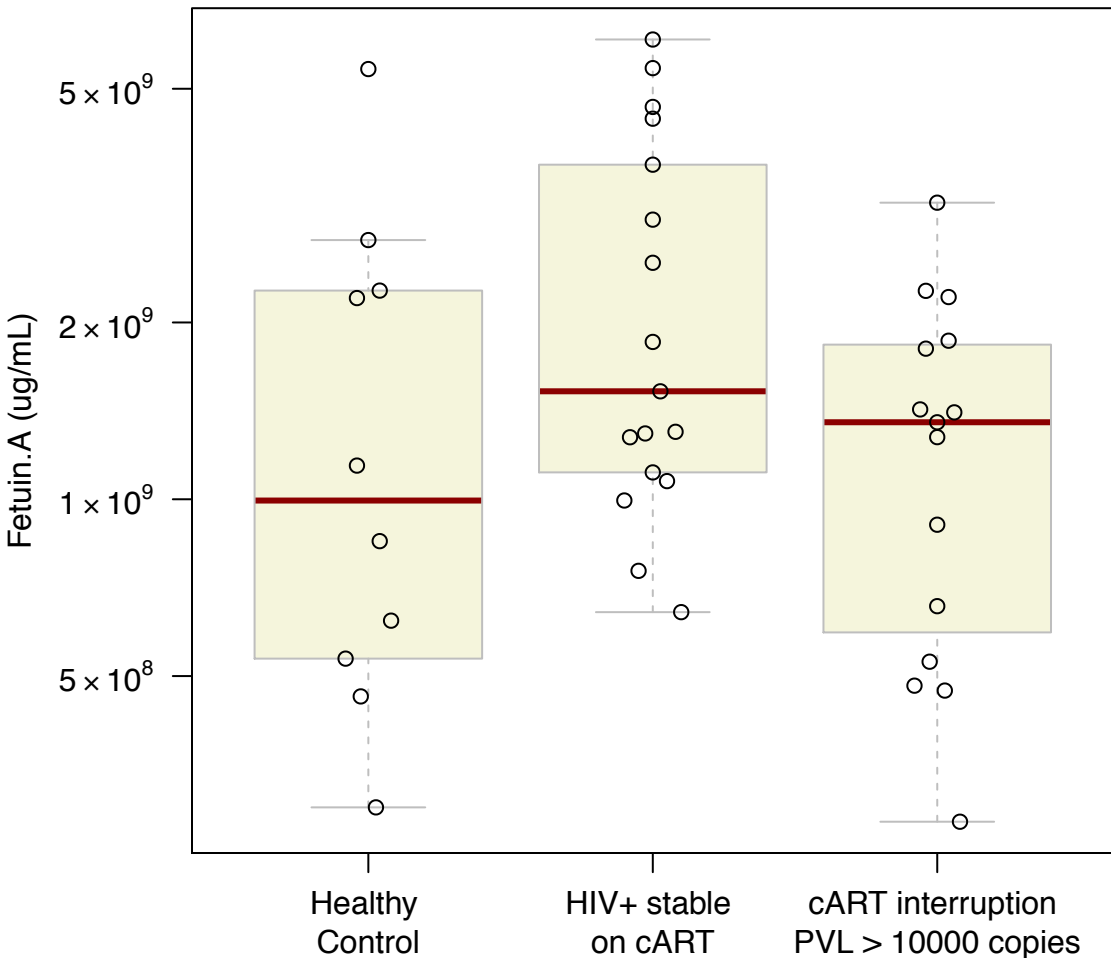

LLOQ: 12 ug/mL

# Fibrinogen

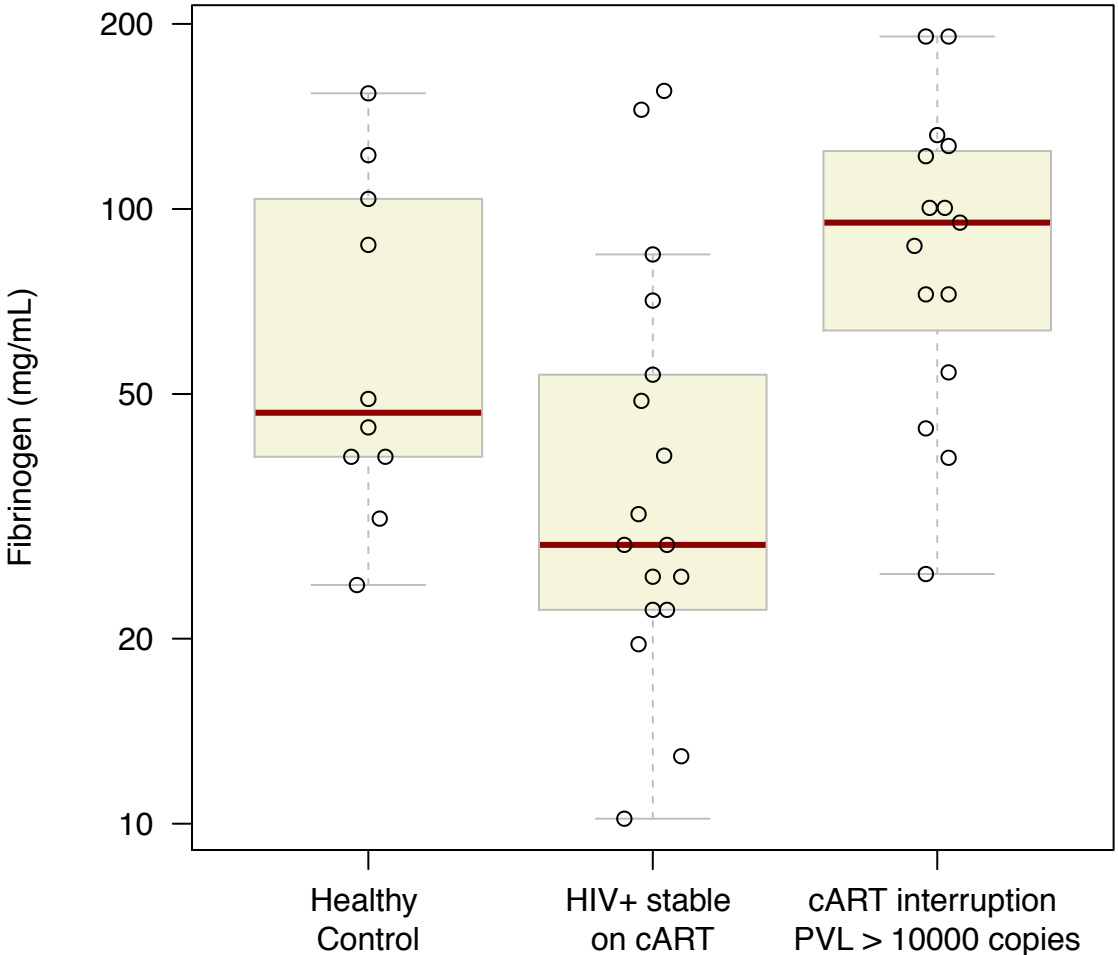

LLOQ: 0.049 mg/mL

# Fibroblast Growth Factor basic (FGF-basic)

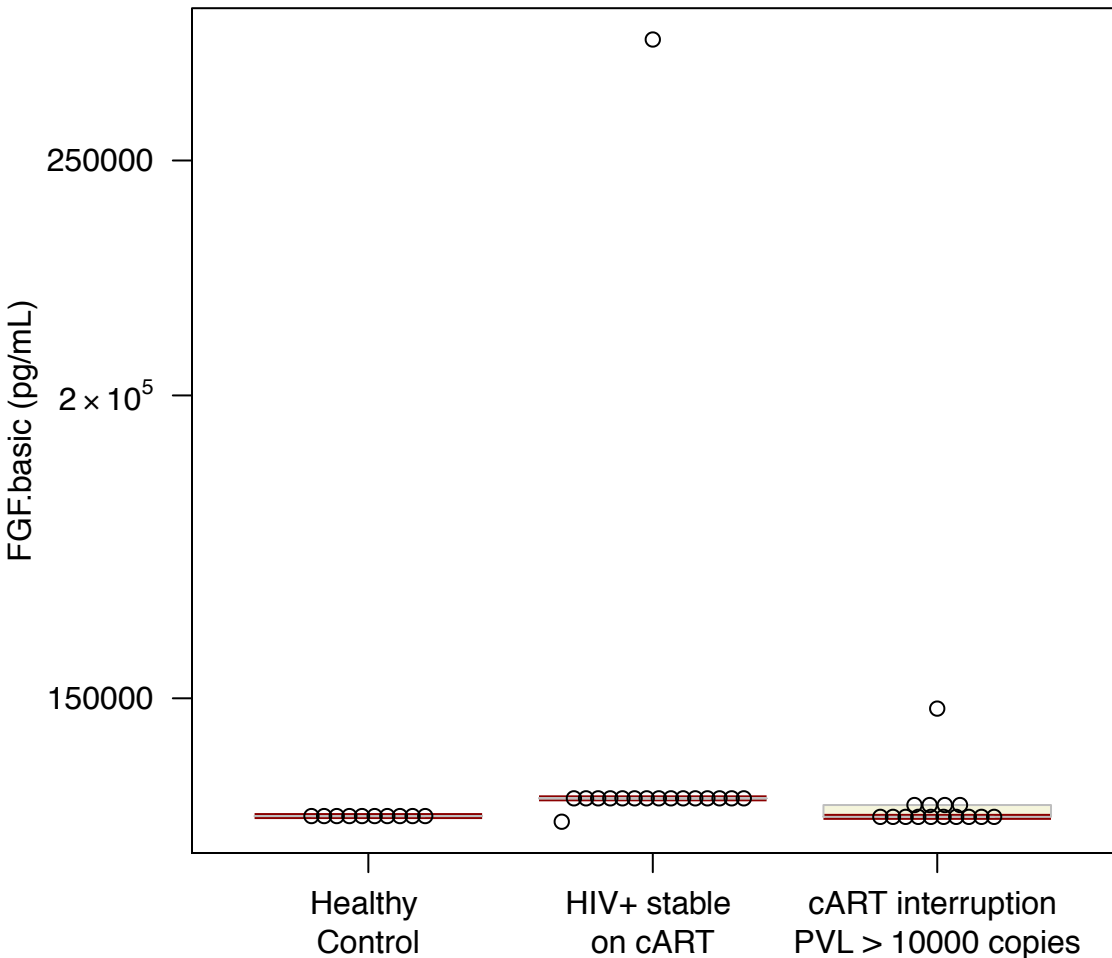

# Fibulin-1C (Fib-1C)

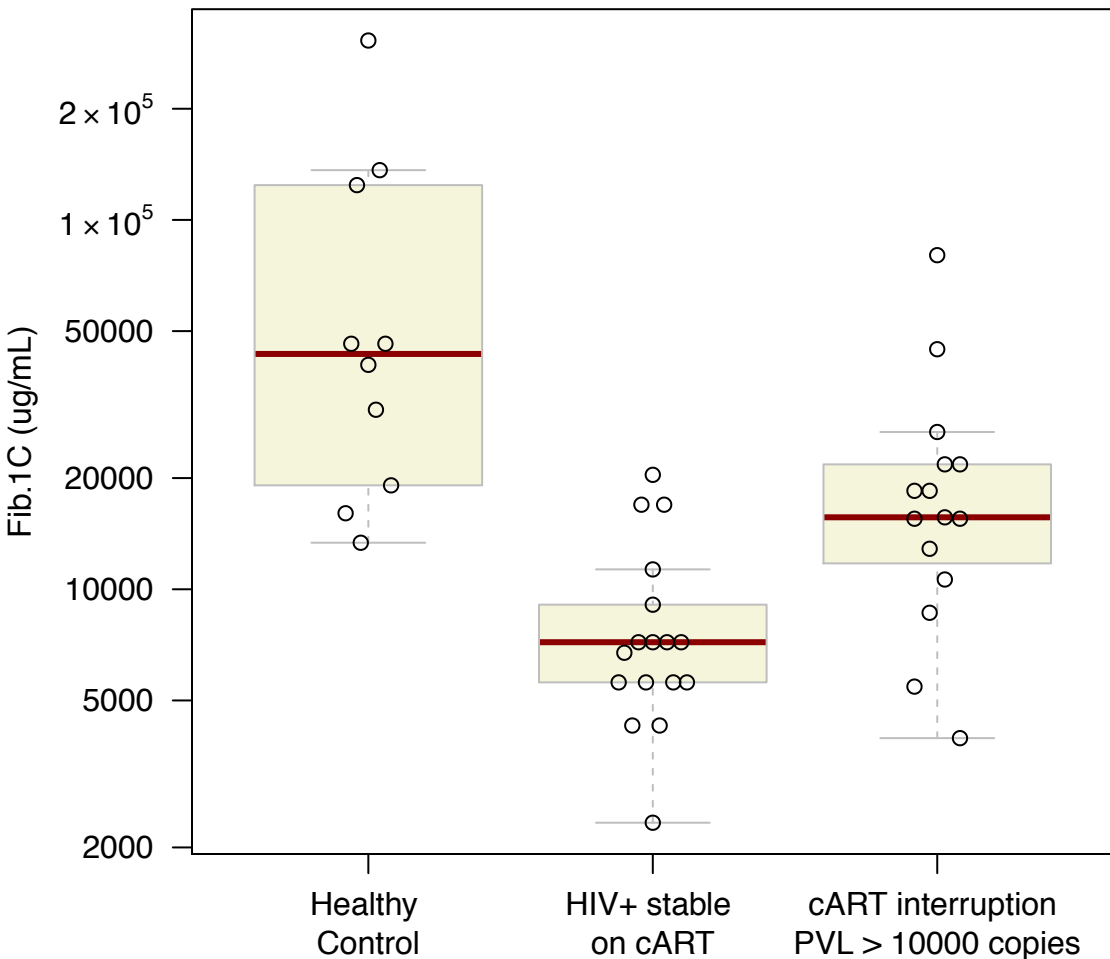

LLOQ: 0.077 ug/mL

# Follicle-Stimulating Hormone (FSH)

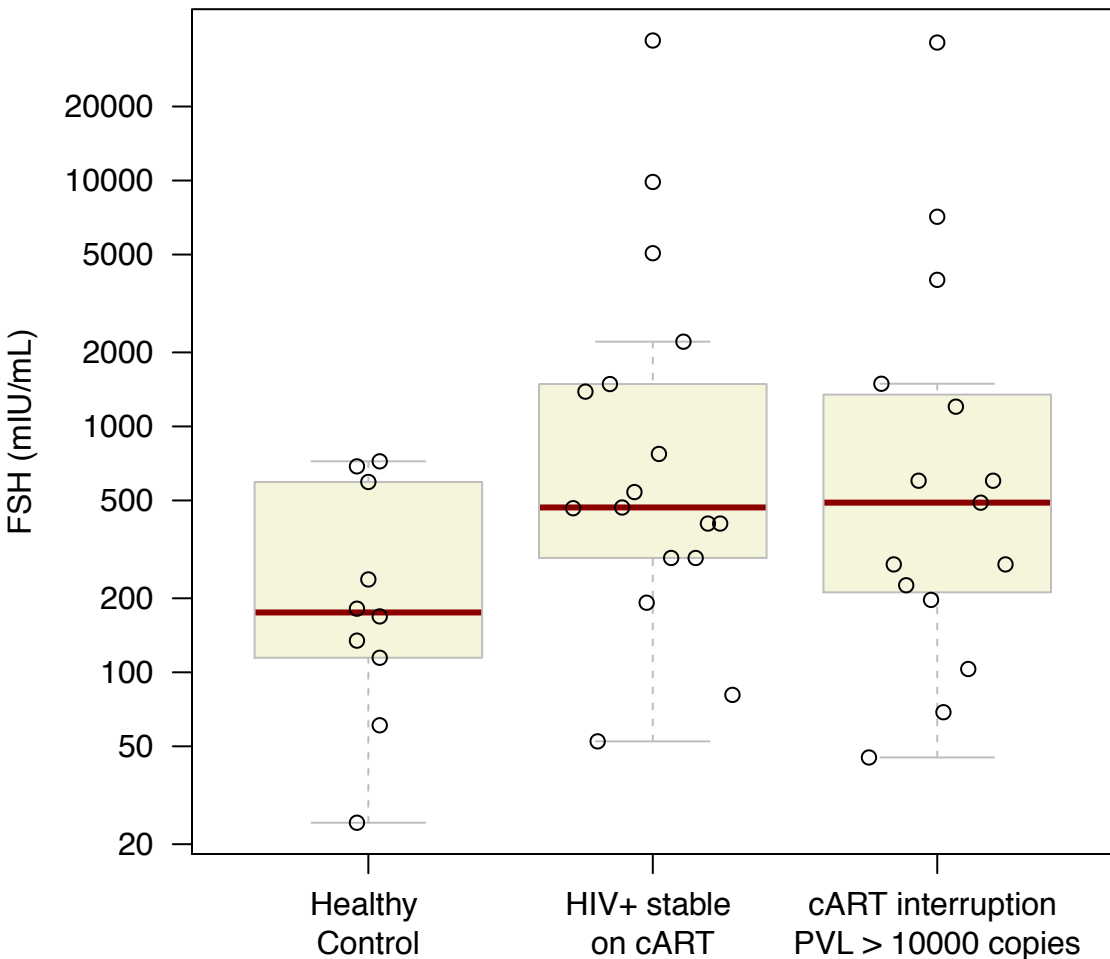

LLOQ: 1.5 mIU/mL

# Galectin-3

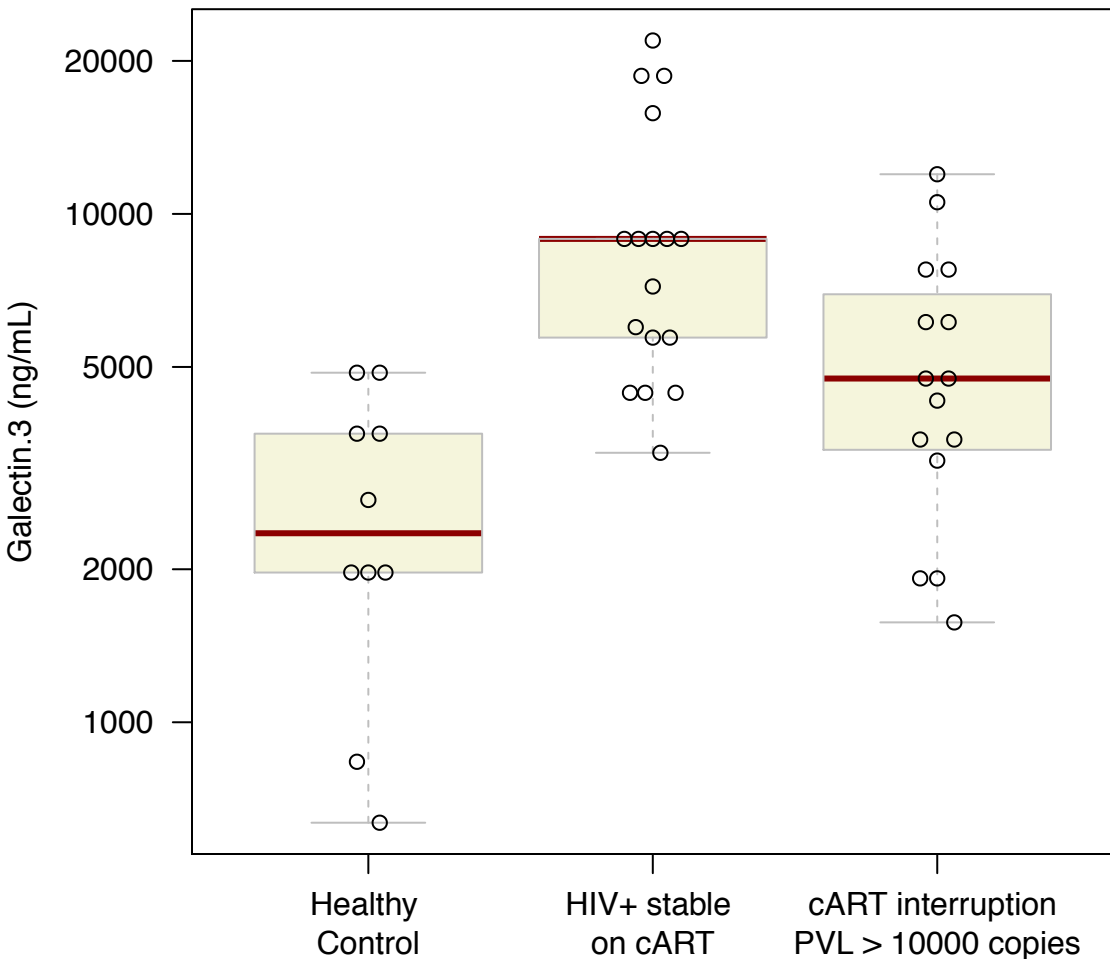

LLOQ: 0.37 ng/mL

# Gelsolin

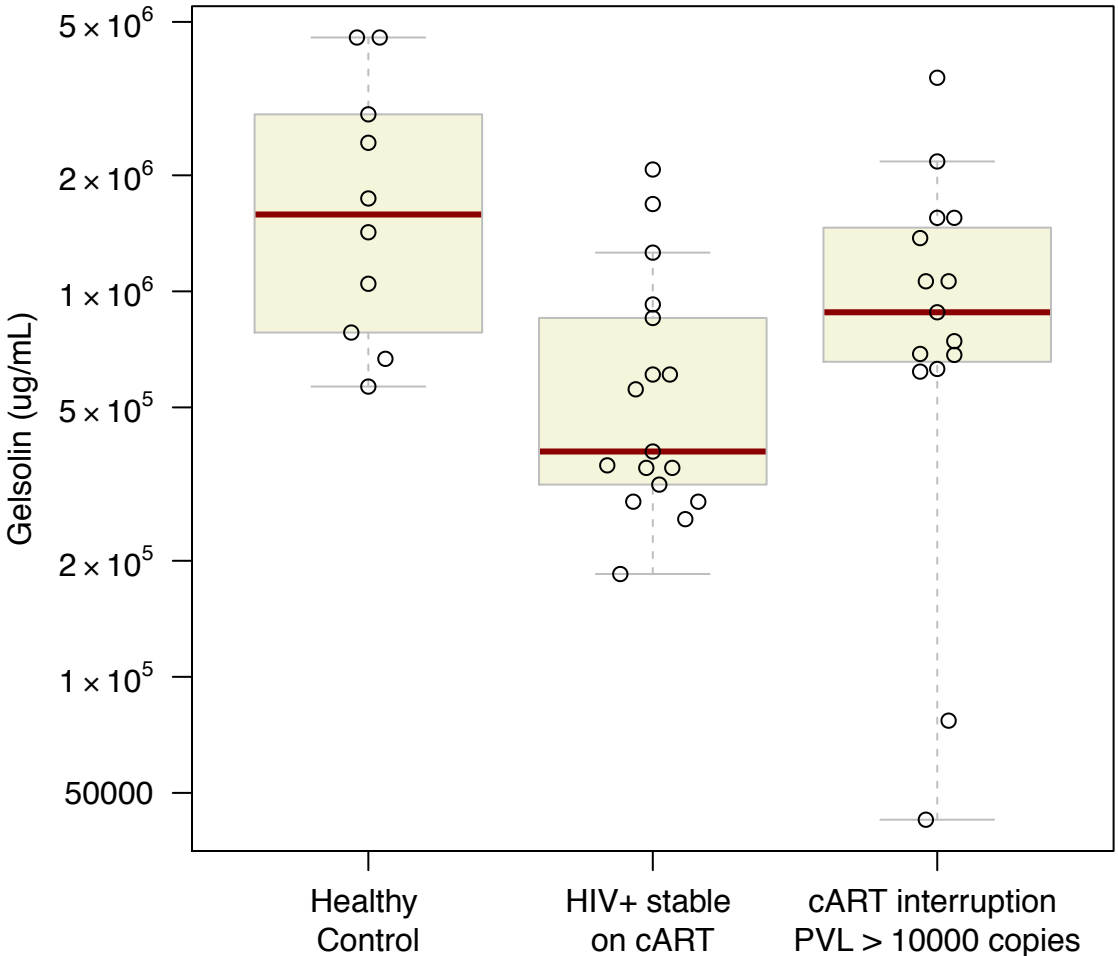

LLOQ: 0.36 ug/mL



# Glucagon-like Peptide 1, active (GLP-1 active)

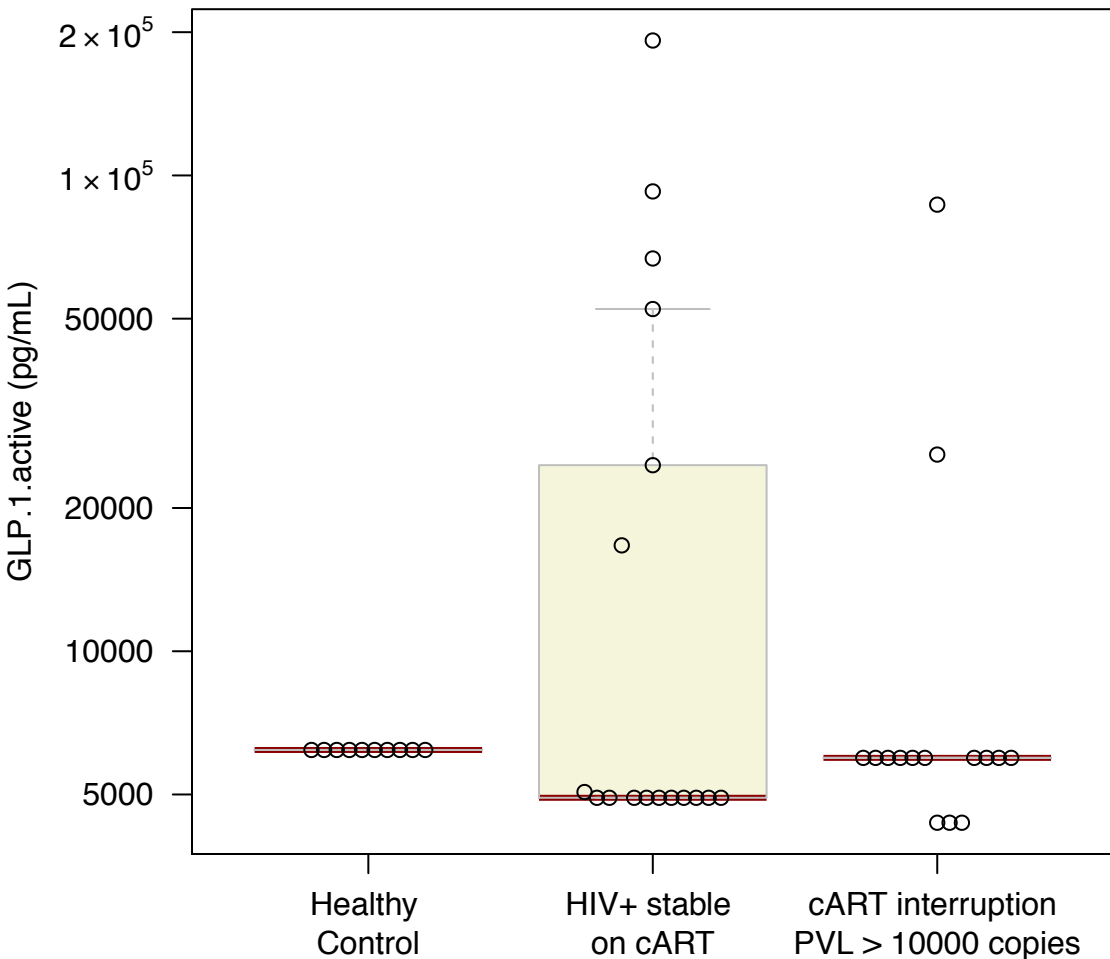

LLOQ: 13 pg/mL

# Glucagon-like Peptide 1, total (GLP-1 total)

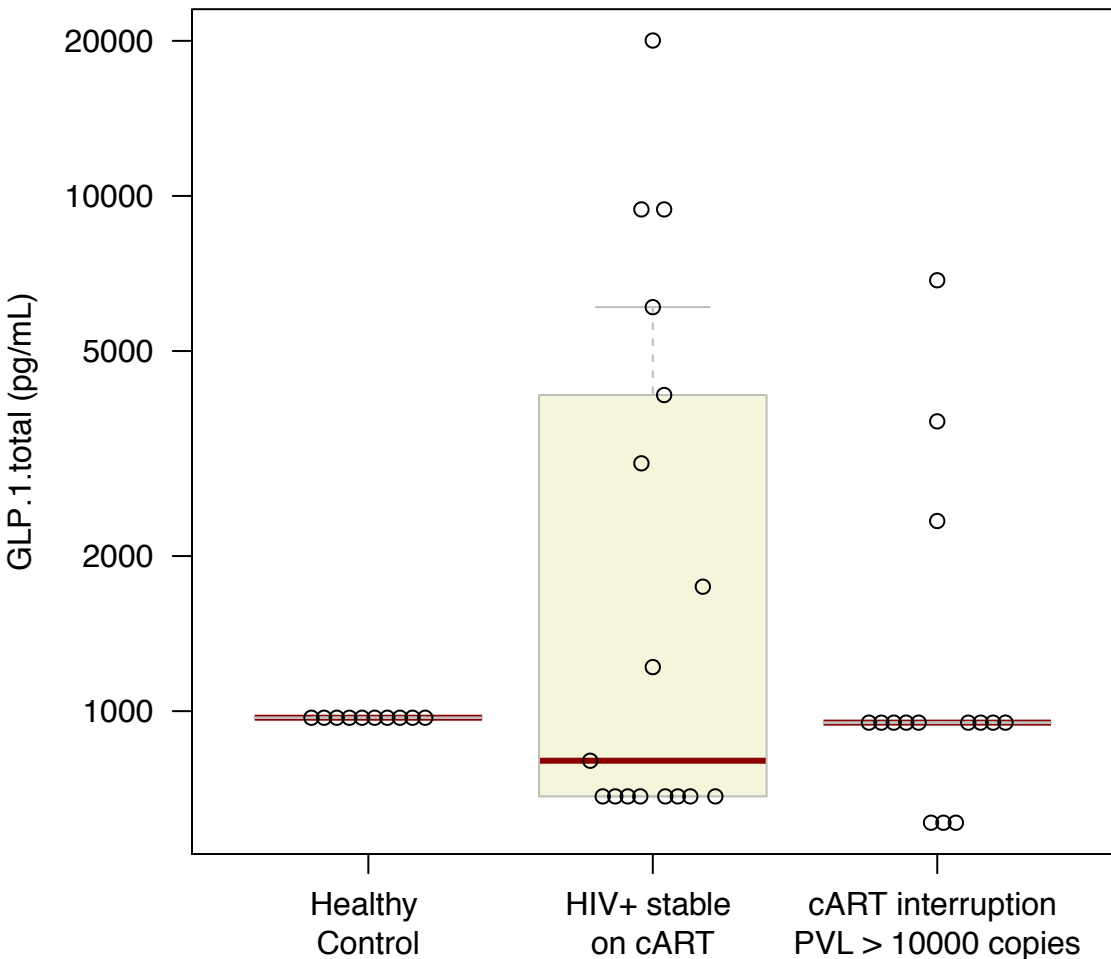

# Glucose-6-phosphate Isomerase (G6PI)

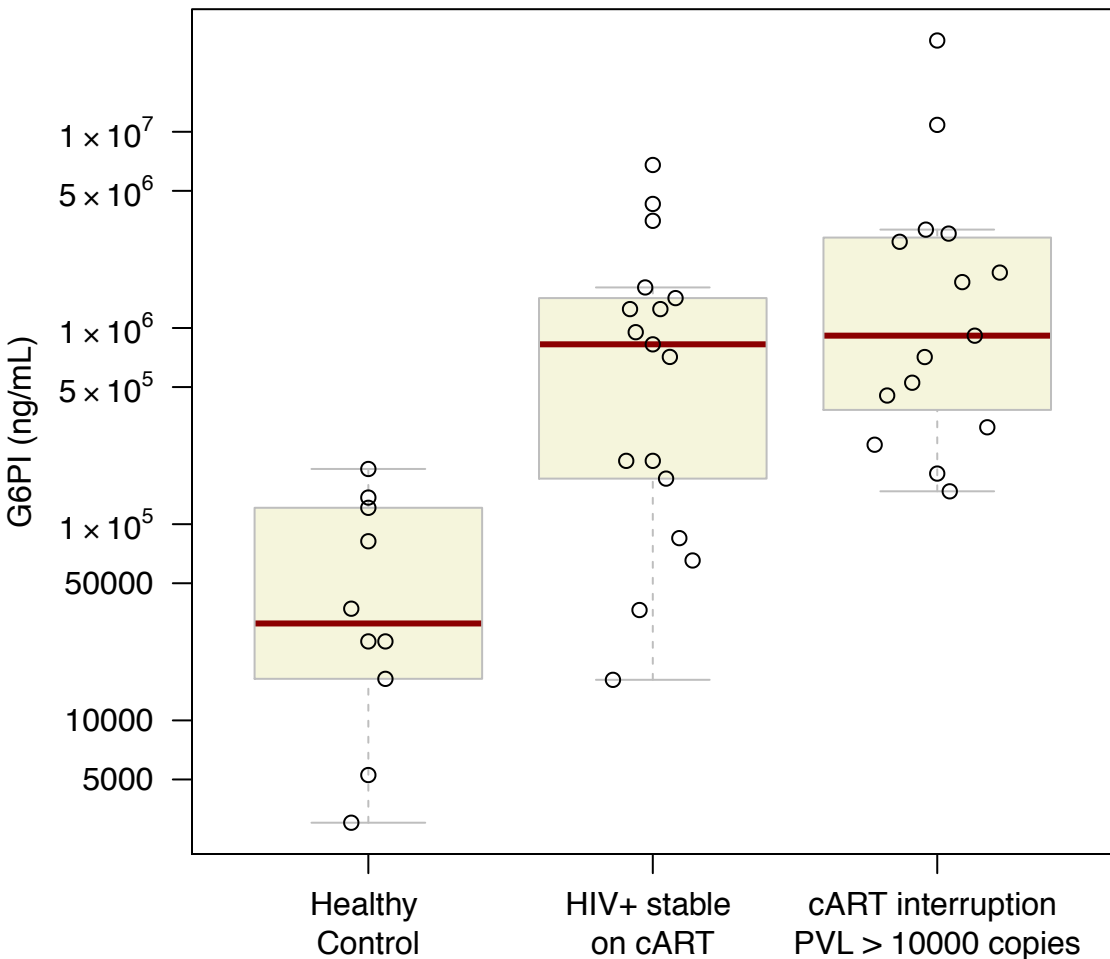

LLOQ: 0.59 ng/mL

# Glutathione S-Transferase alpha (GST-alpha)

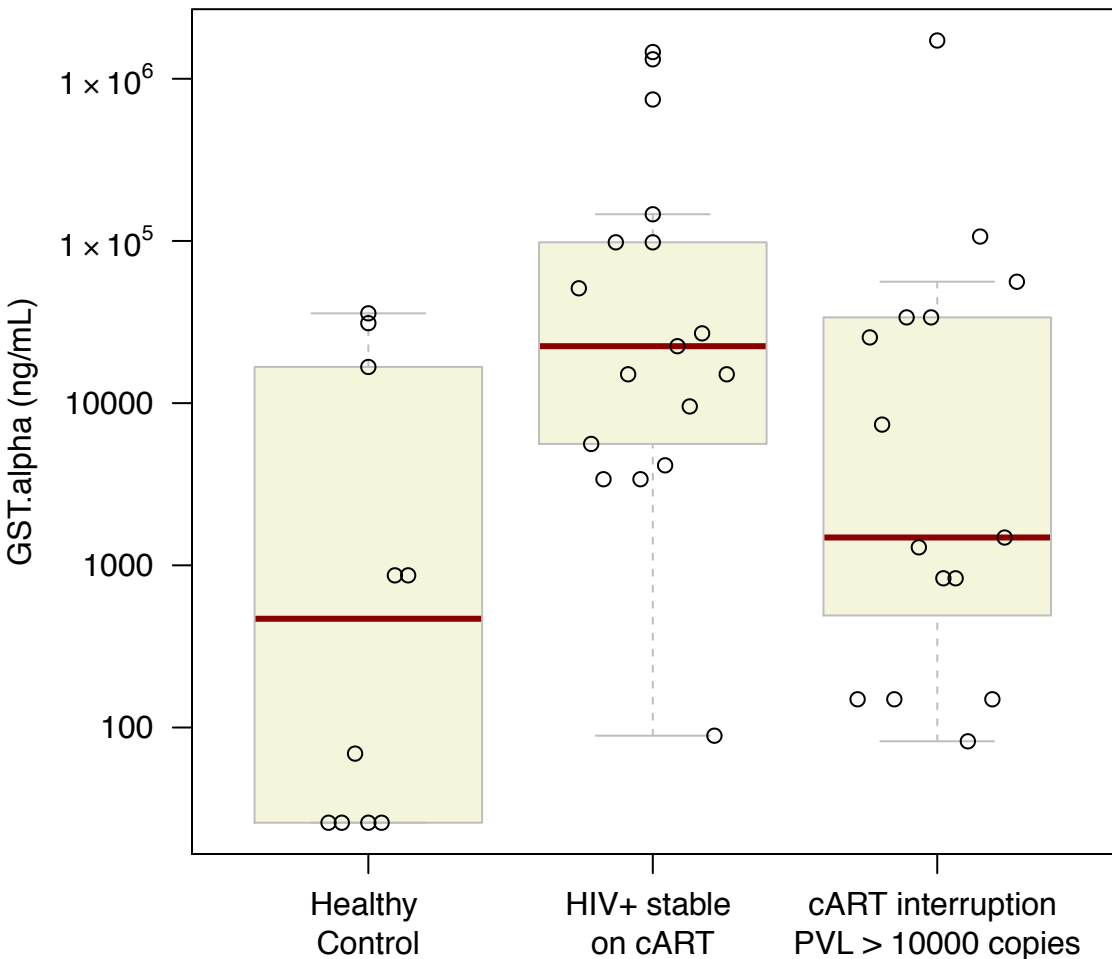

LLOQ: 3 ng/mL

# Granulocyte Colony-Stimulating Factor (G-CSF)

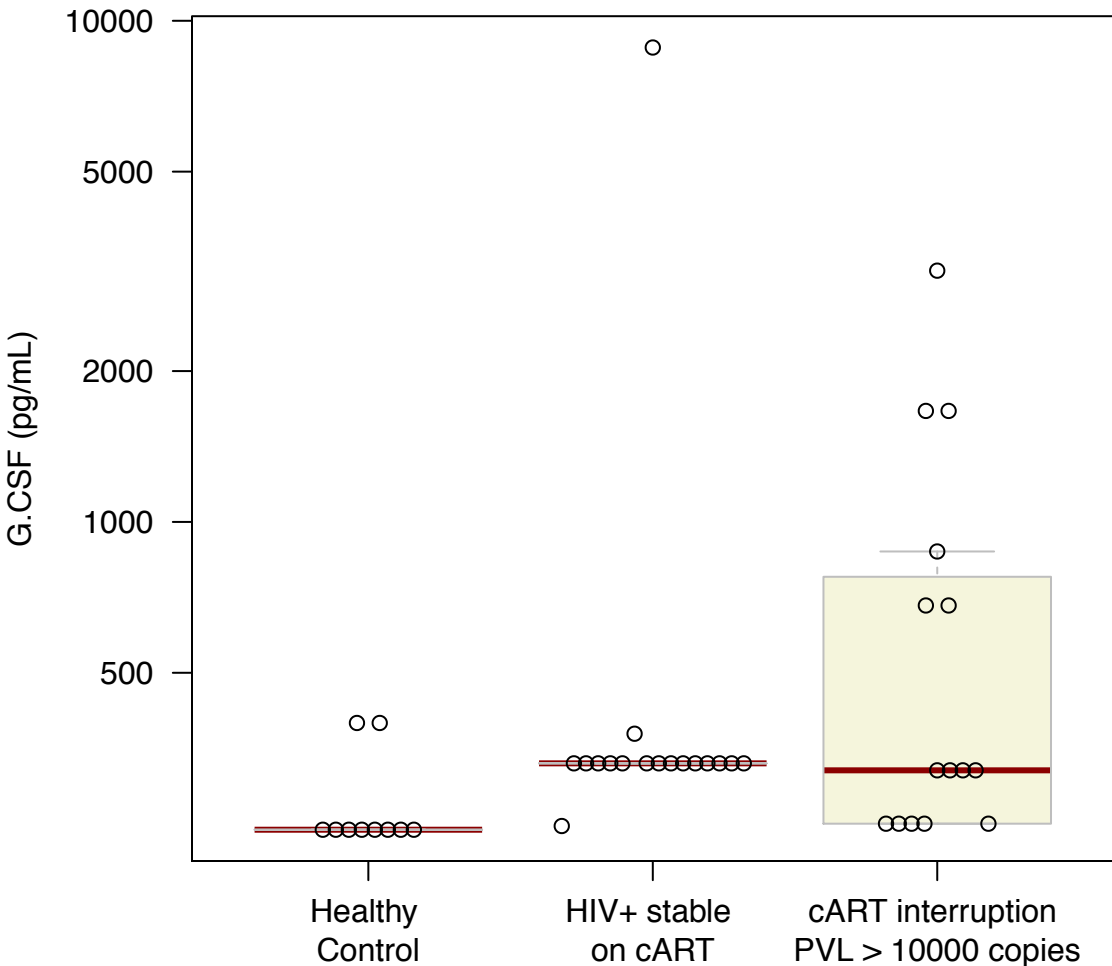

# Growth Hormone (GH)

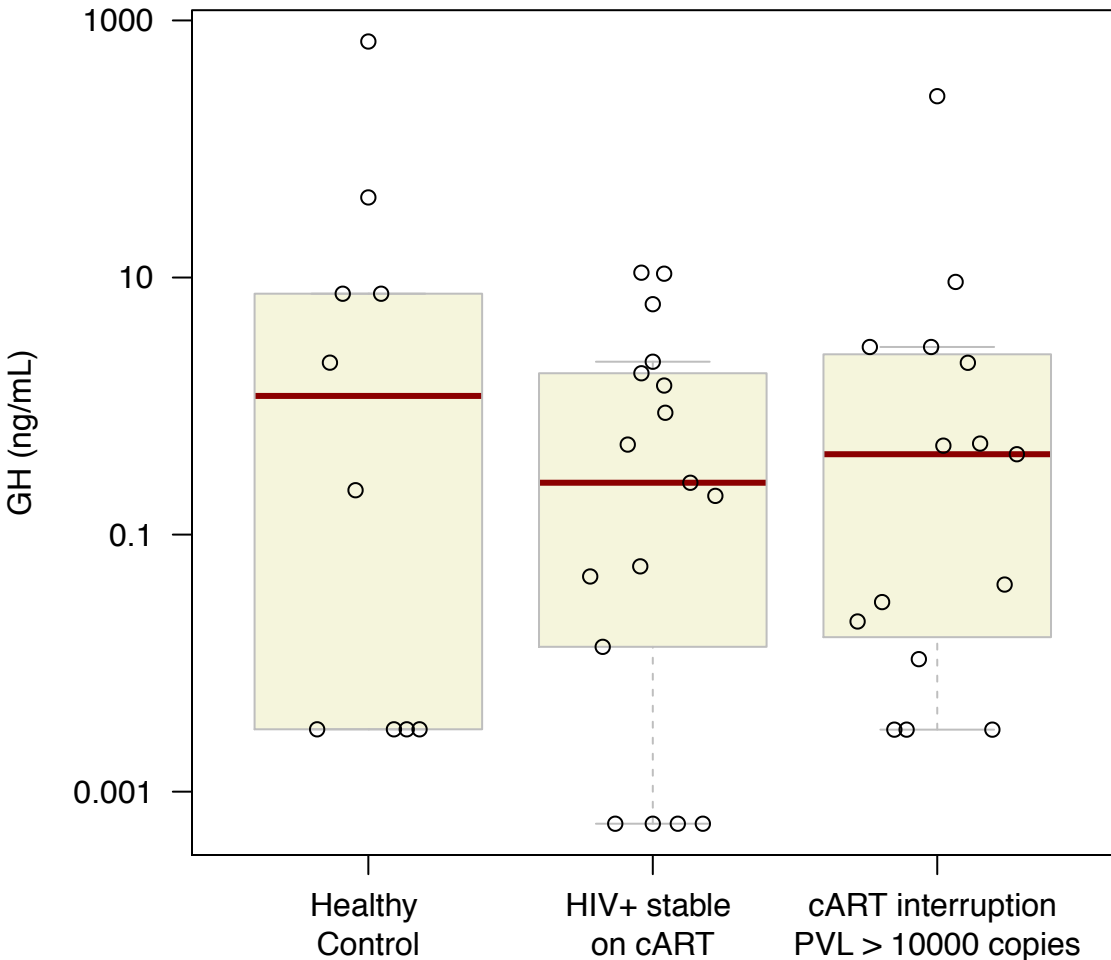

# Growth-Regulated alpha protein (GRO-alpha)

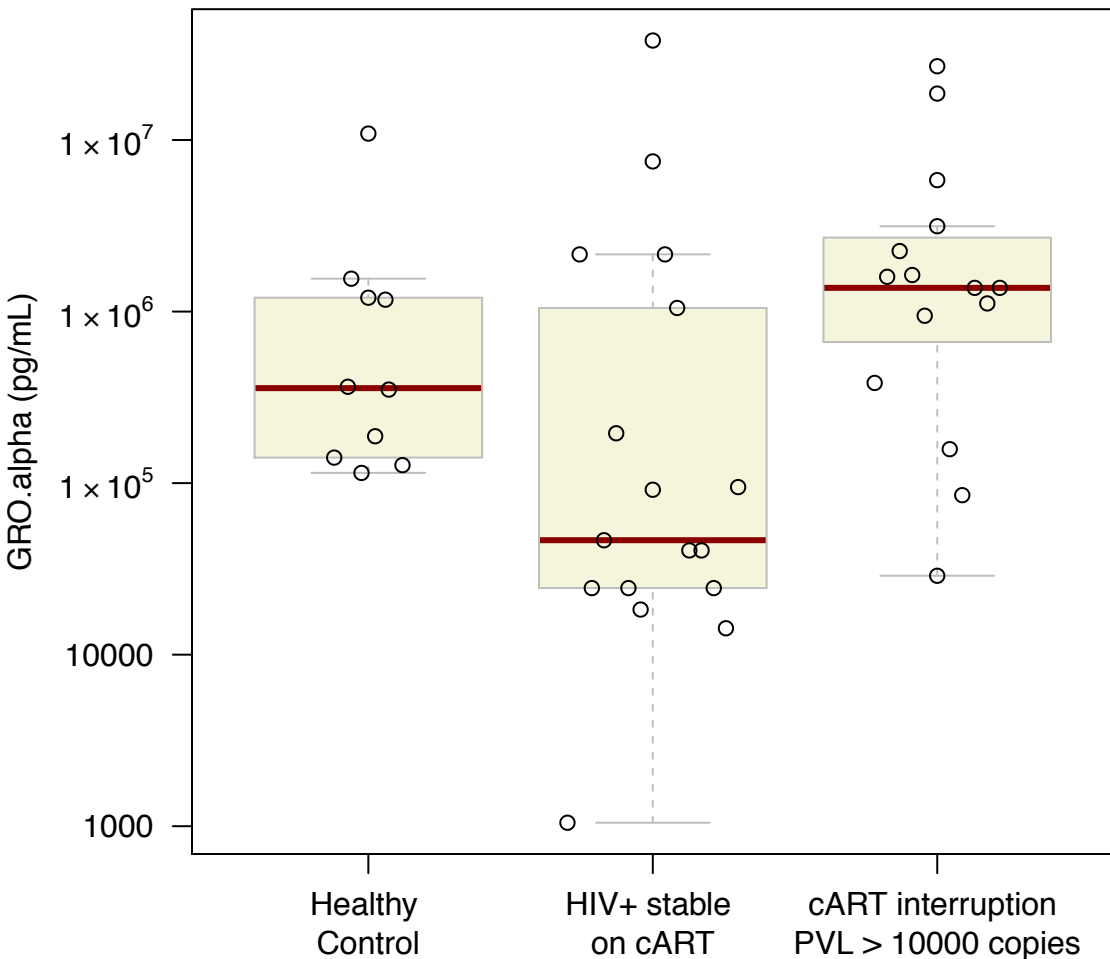

LLOQ: 4.7 pg/mL





# Heat Shock Protein 60 (HSP-60)

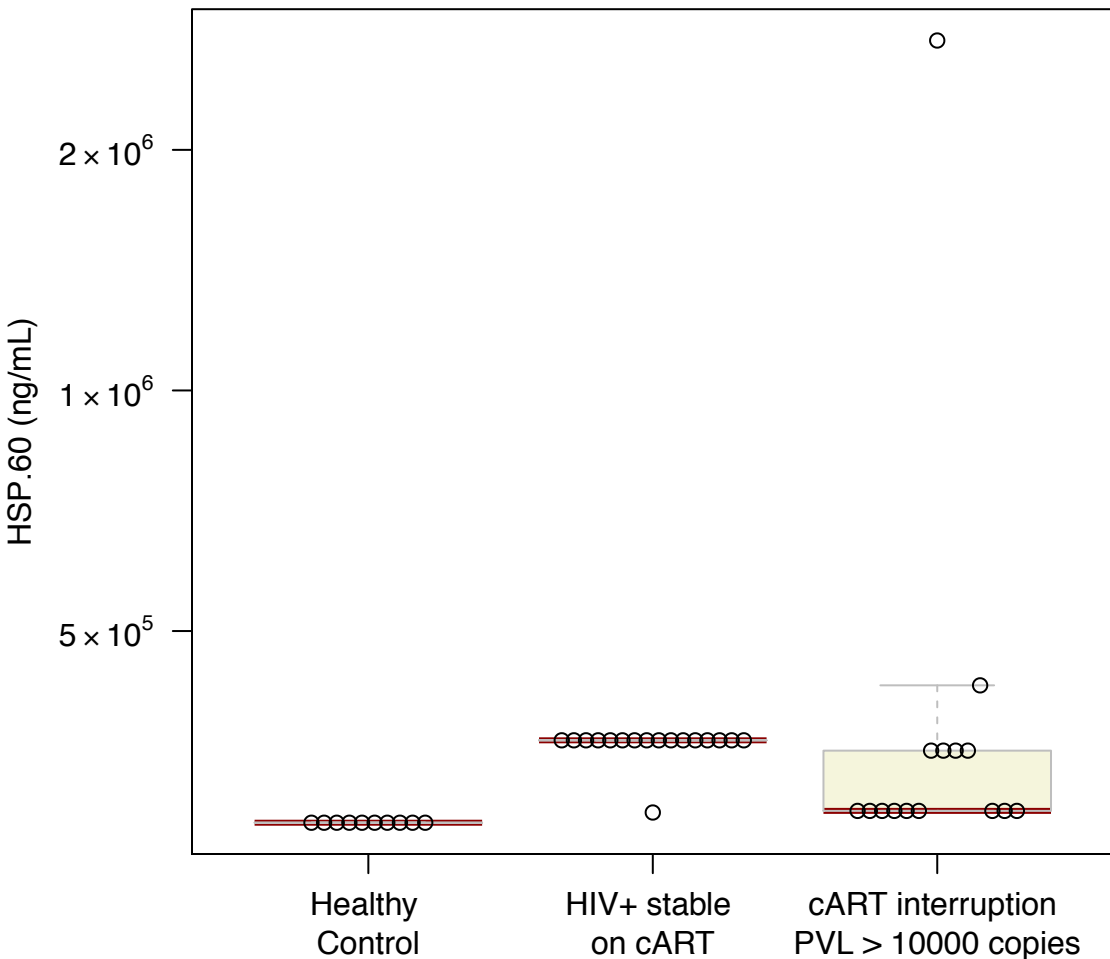

LLOQ: 45 ng/mL

# Hepatocyte Growth Factor (HGF)

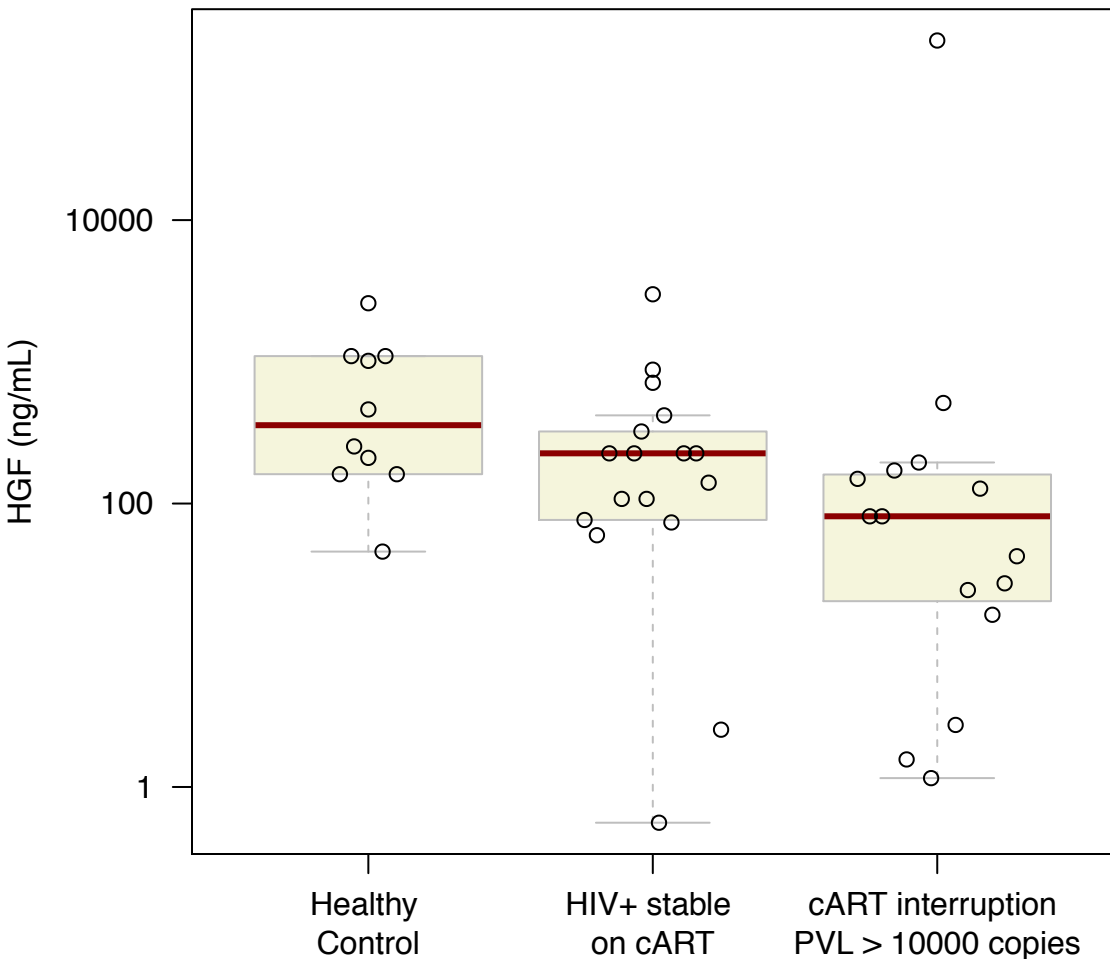

# Hepatocyte Growth Factor receptor (HGF receptor)

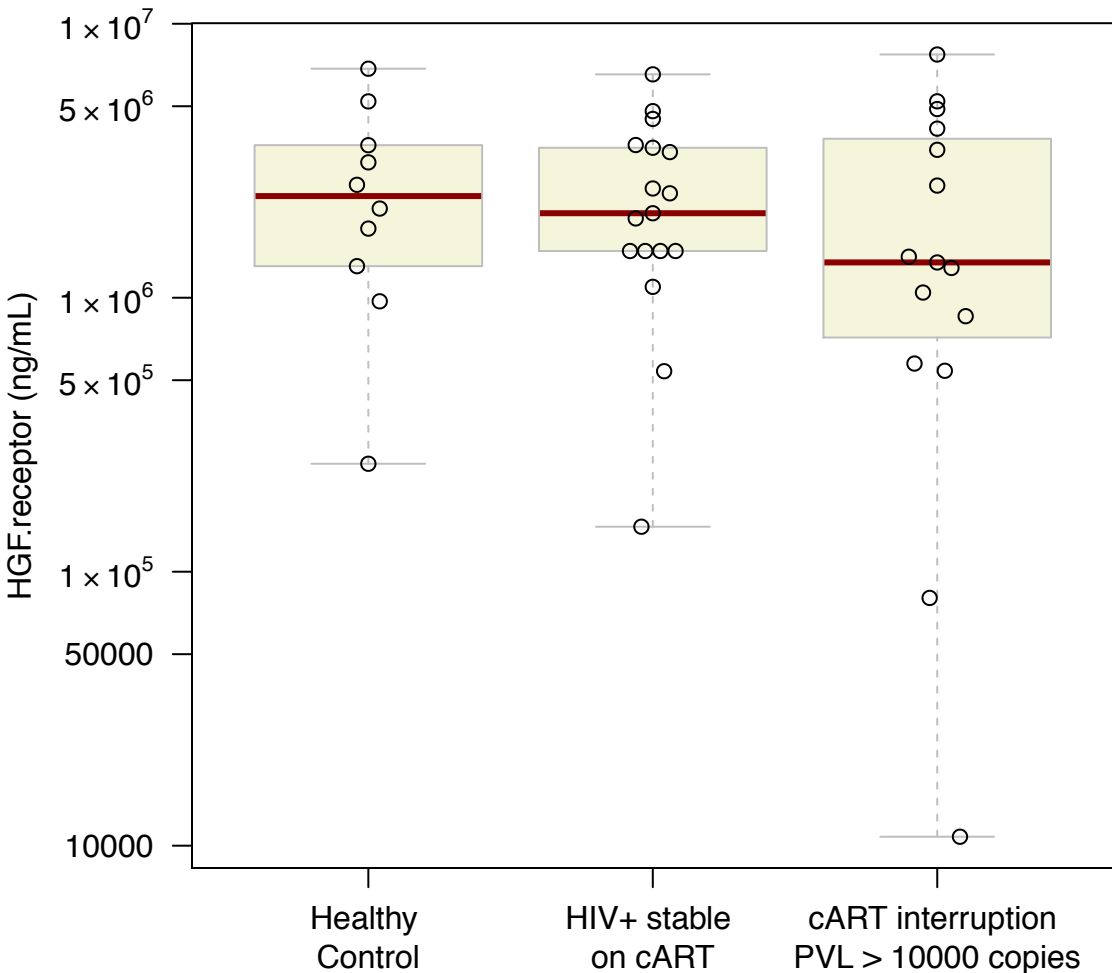

# Hepsin

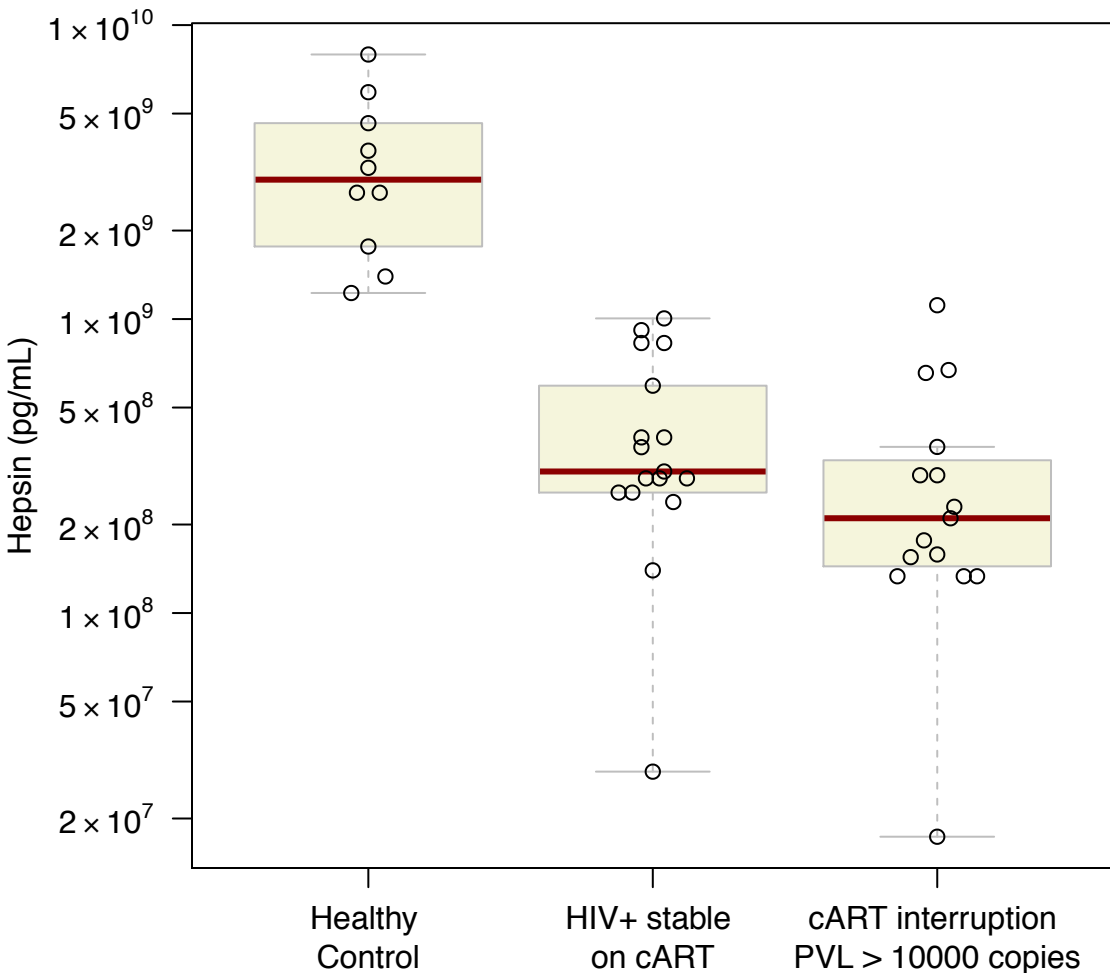

LLOQ: 71 pg/mL

# Human Epidermal Growth Factor Receptor 2 (HER2)

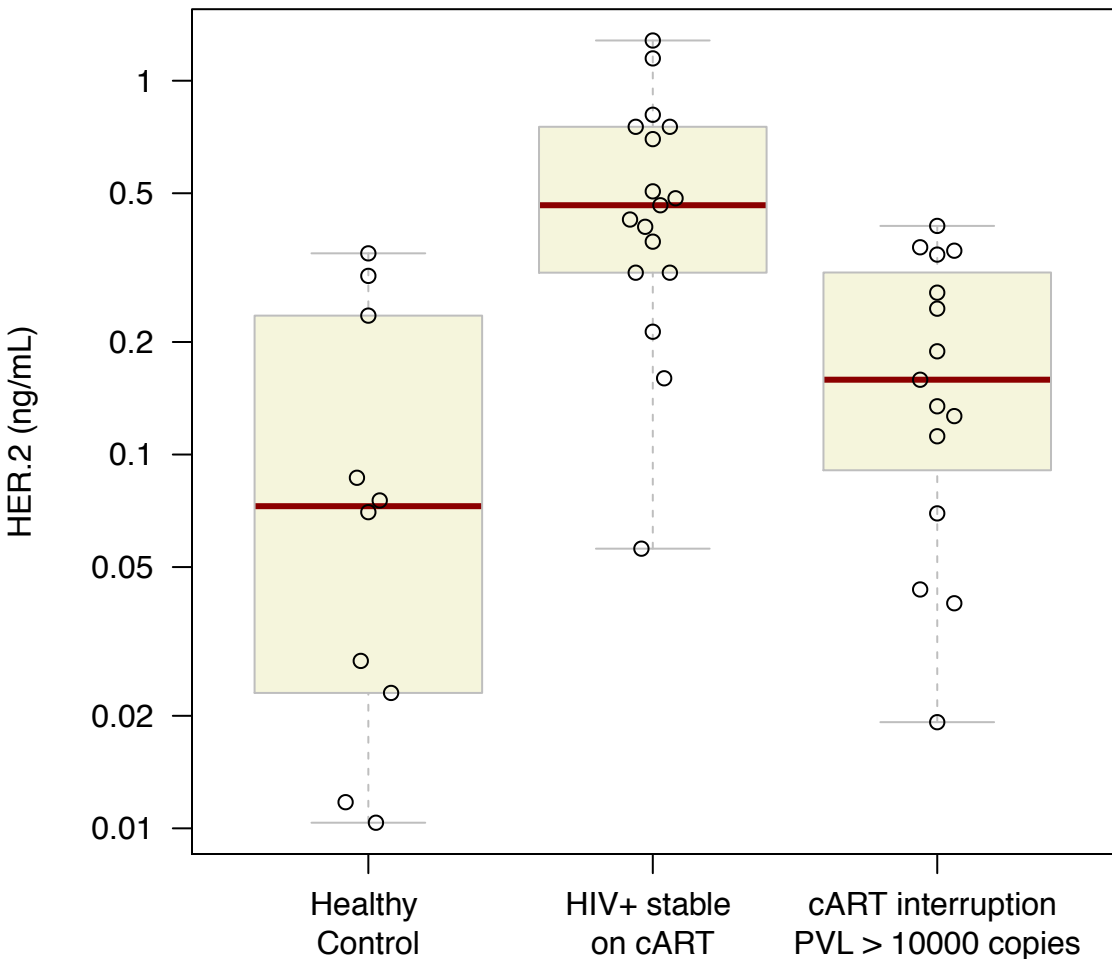

LLOQ: 0.03 ng/mL

# Immunoglobulin A (IgA)

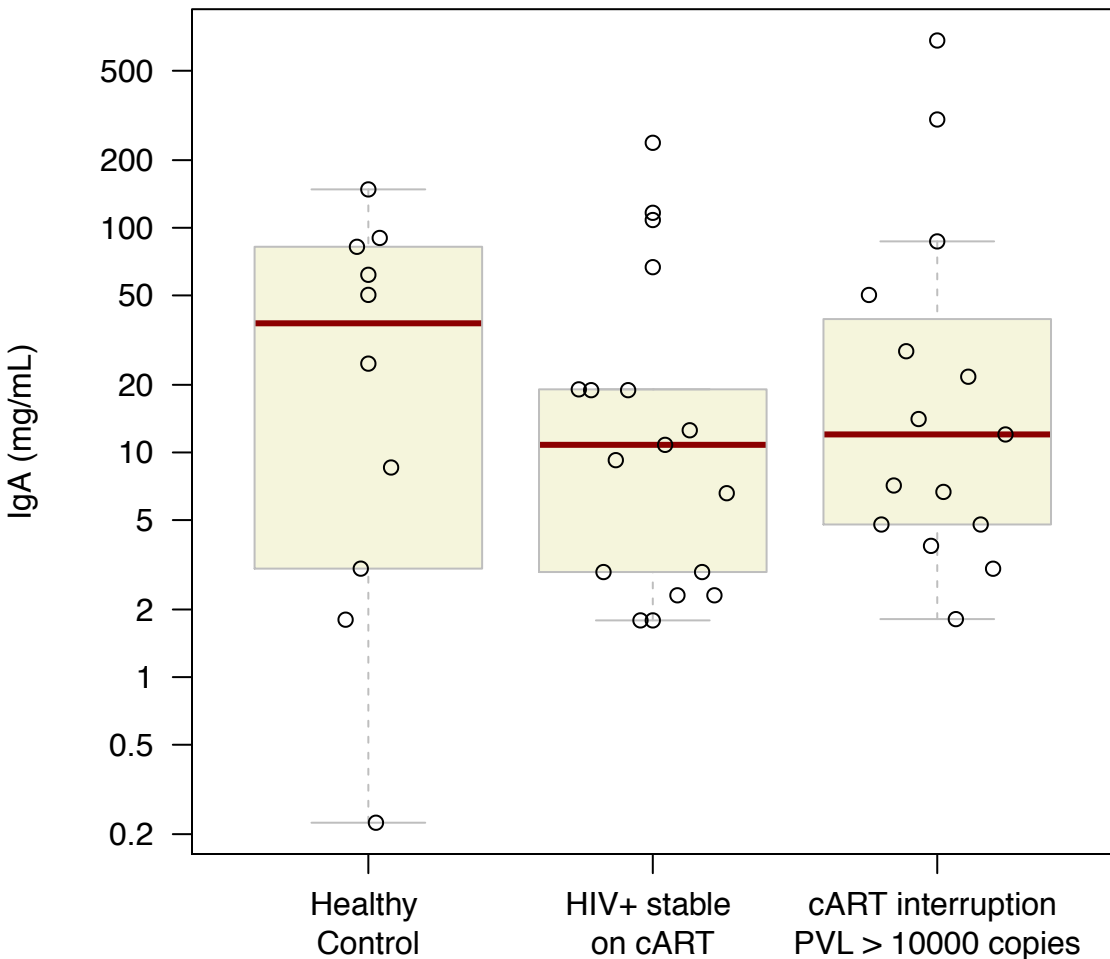

LLOQ: 0.056 mg/mL

# Immunoglobulin E (IgE)

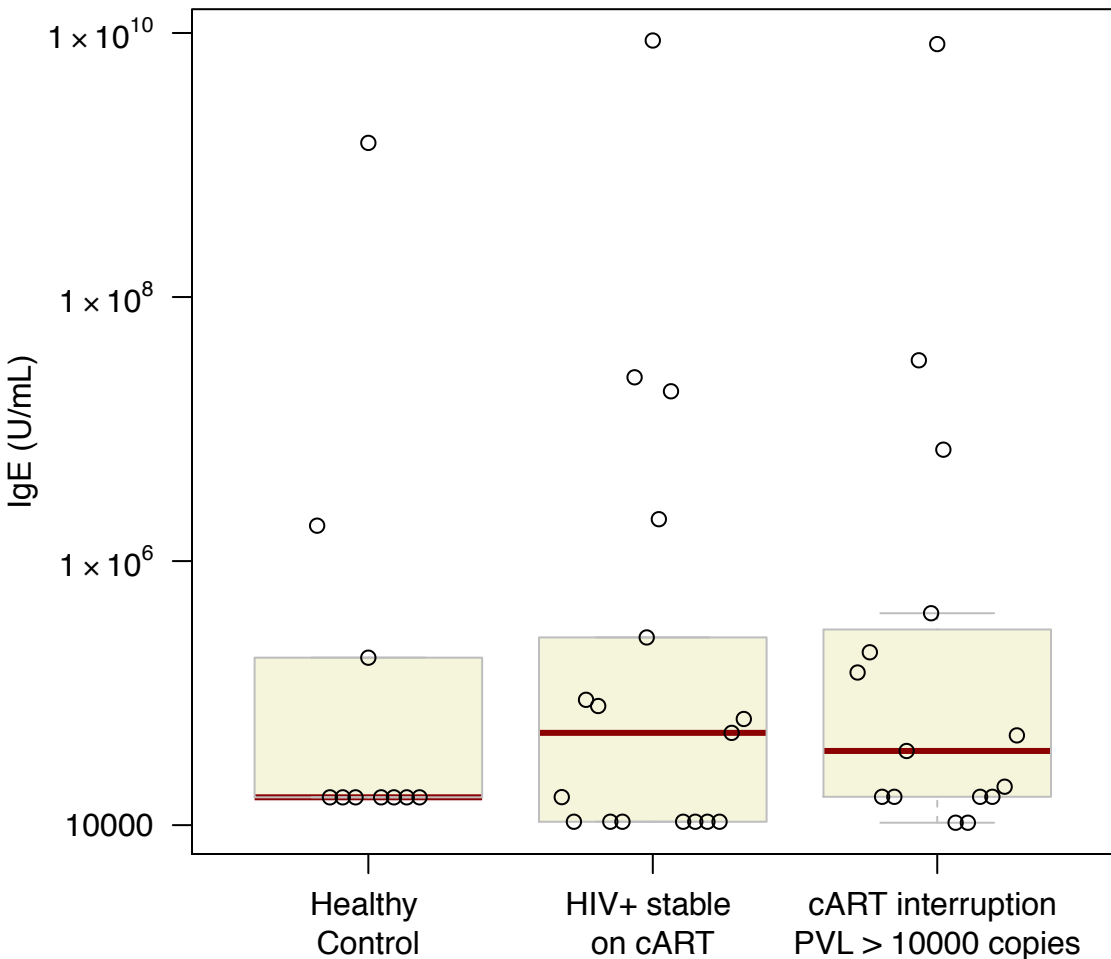

LLOQ: 18 U/mL

# Immunoglobulin M (IgM)

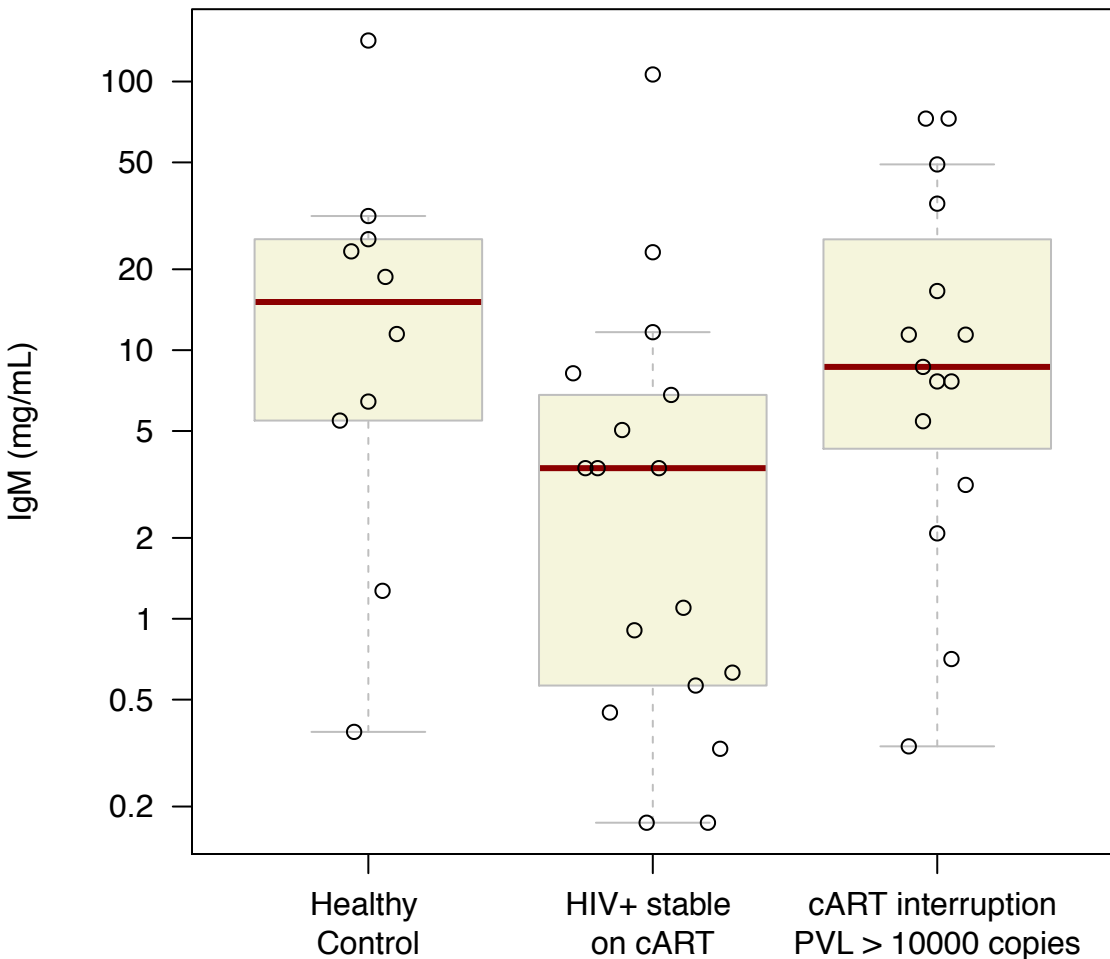

LLOQ: 0.094 mg/mL



# Insulin

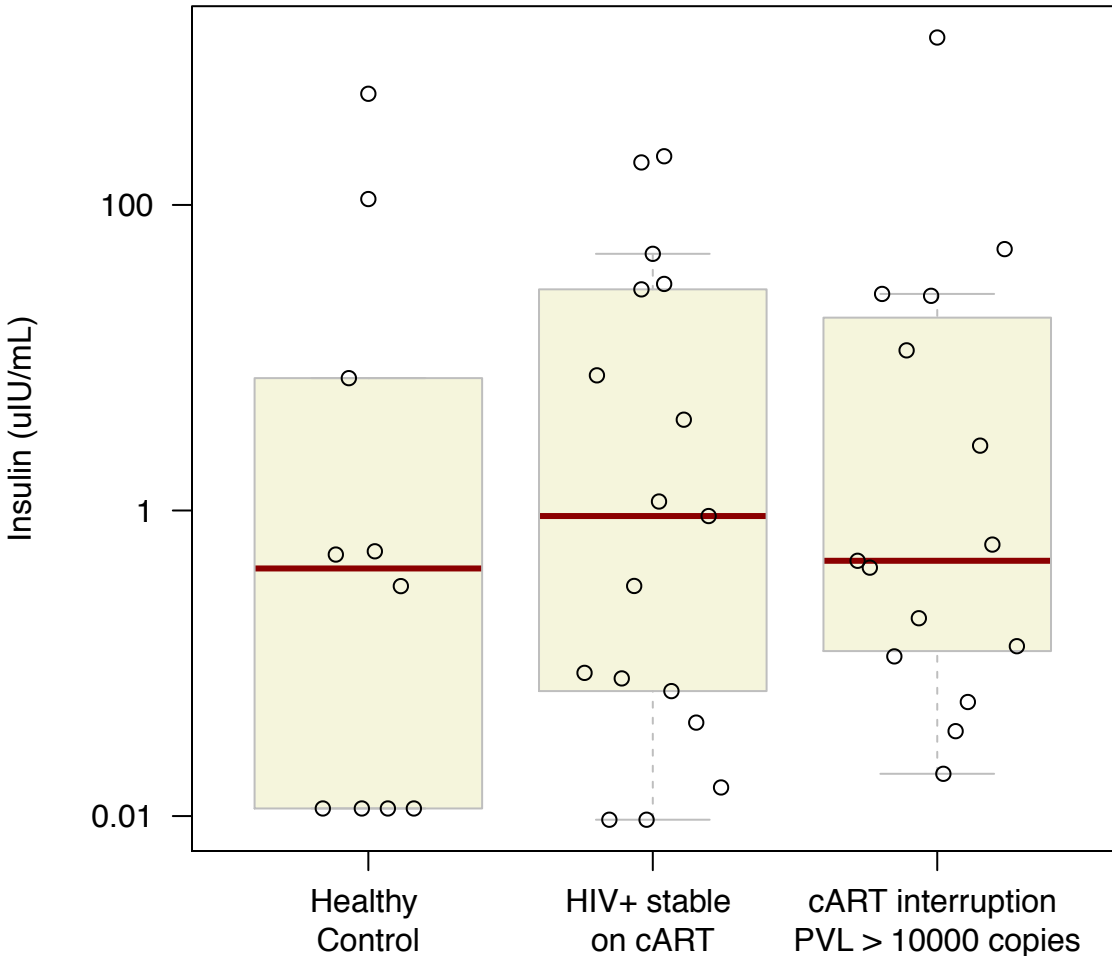

LLOQ: 0.21 uIU/mL

# Insulin-like Growth Factor-Binding Protein 1 (IGFBP1)

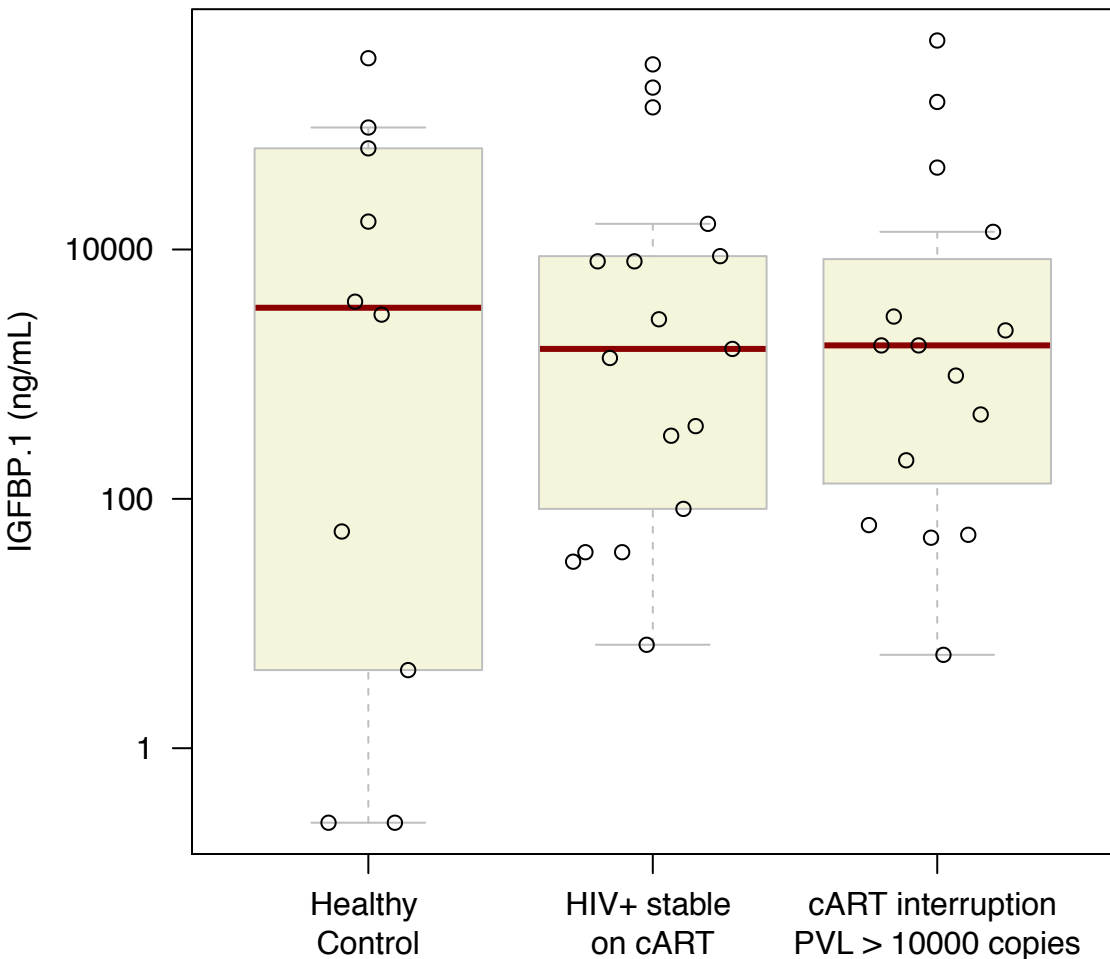

LLOQ: 0.93 ng/mL

# Insulin-like Growth Factor-Binding Protein 2 (IGFBP2)

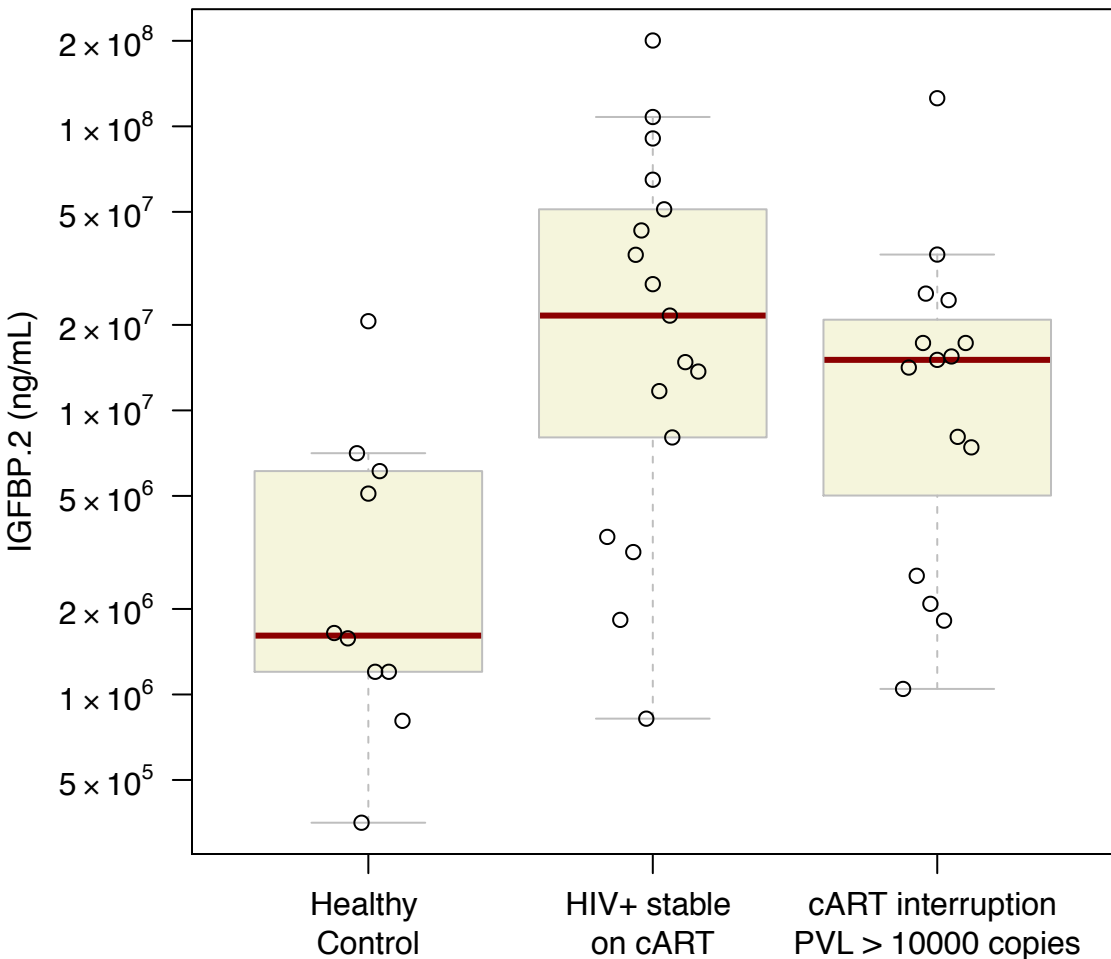

# Insulin-like Growth Factor-Binding Protein 3 (IGFBP3)

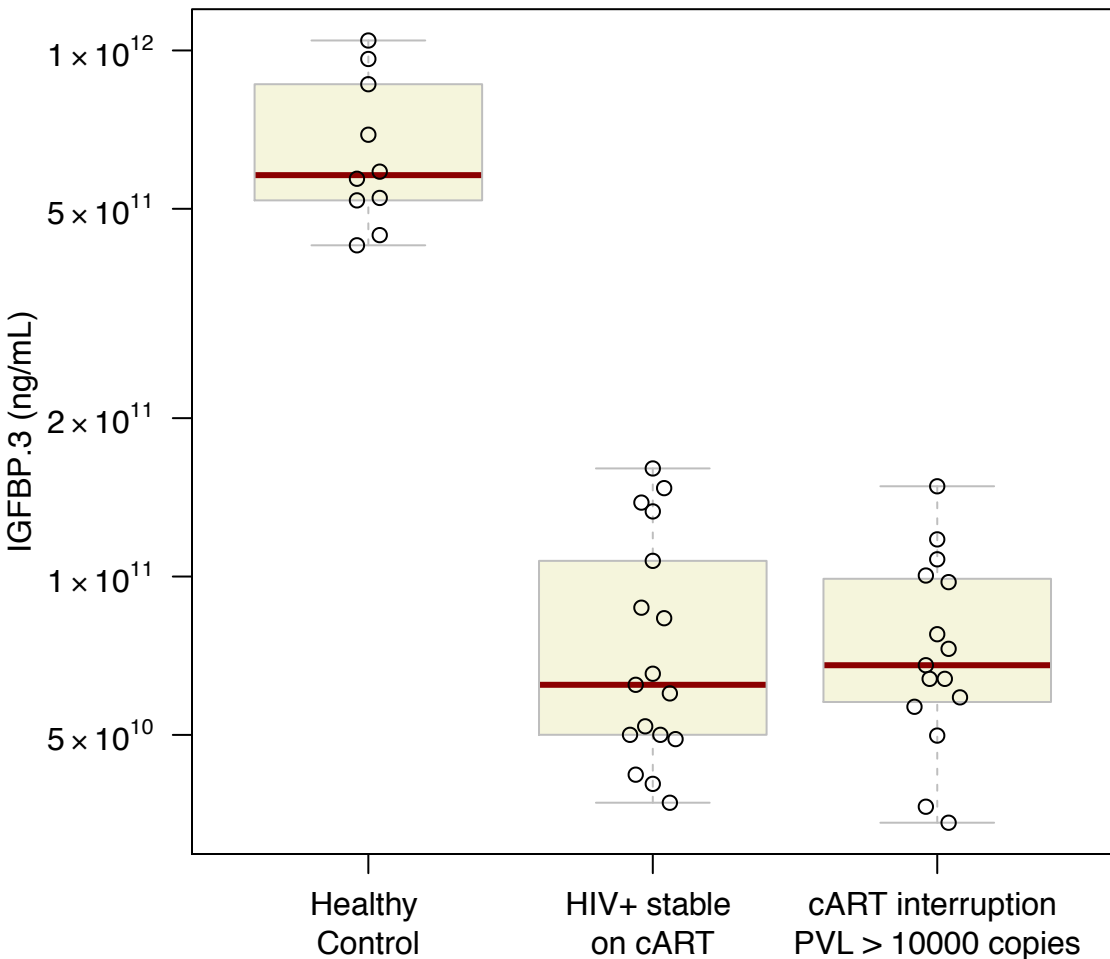

LLOQ: 63 ng/mL

# Insulin-like Growth Factor Binding Protein 4 (IGFBP4)

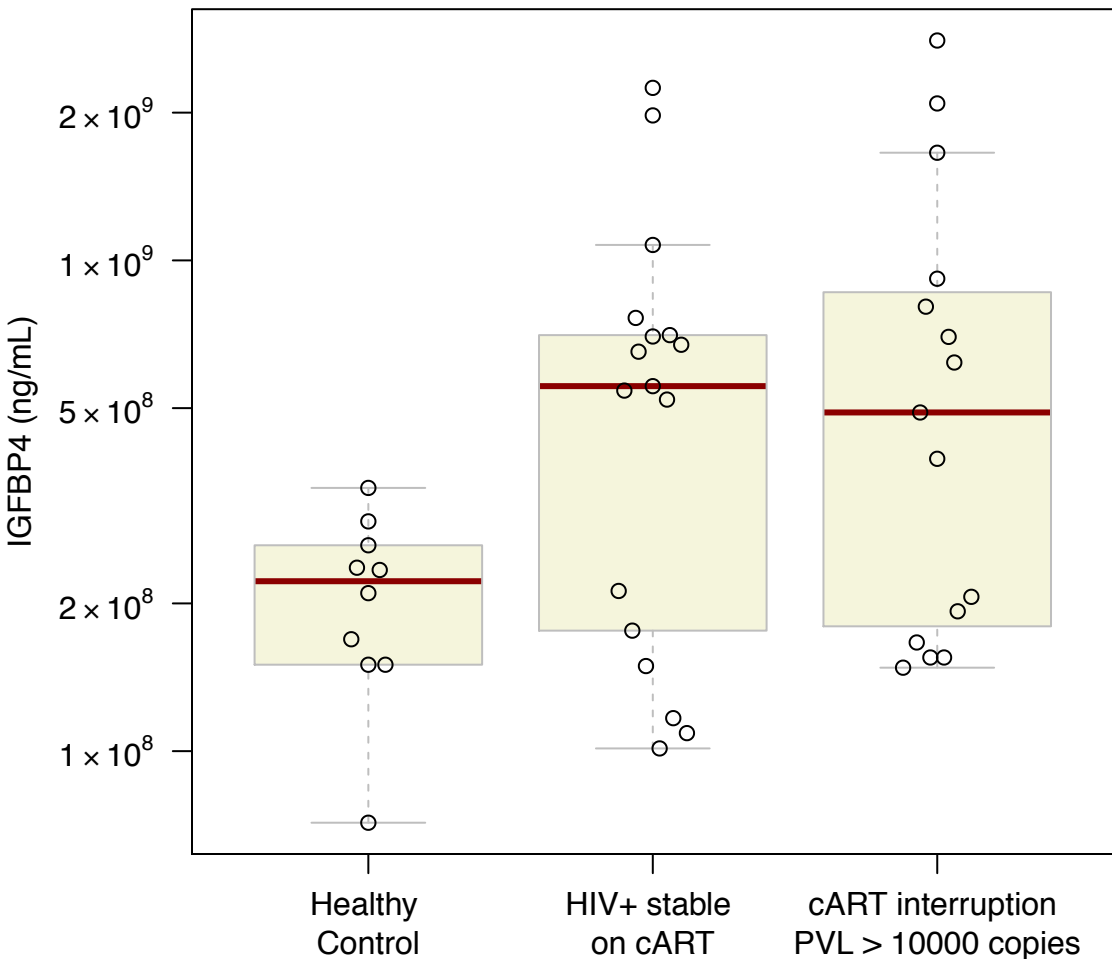

# Insulin-like Growth Factor Binding Protein 5 (IGFBP5)

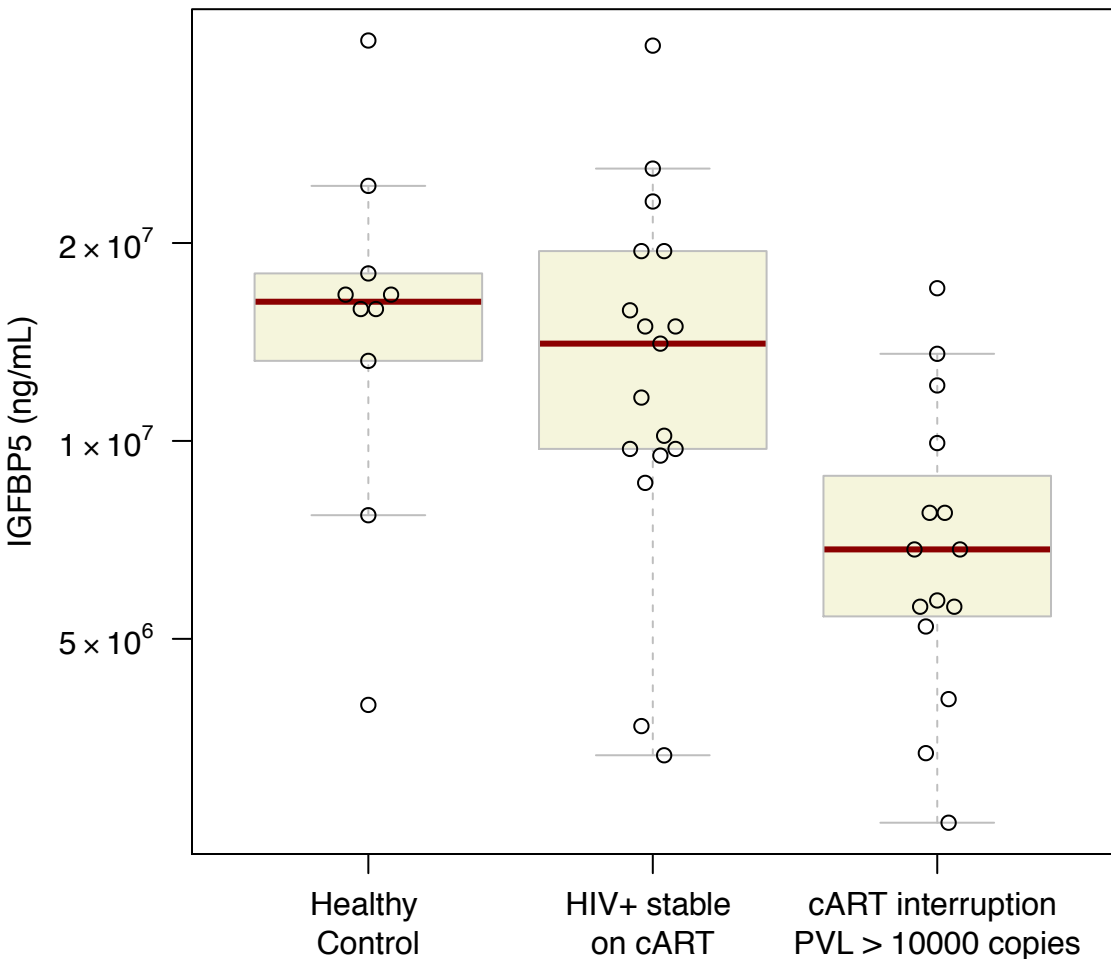

LLOQ: 37 ng/mL

# Insulin-like Growth Factor Binding Protein 6 (IGFBP6)

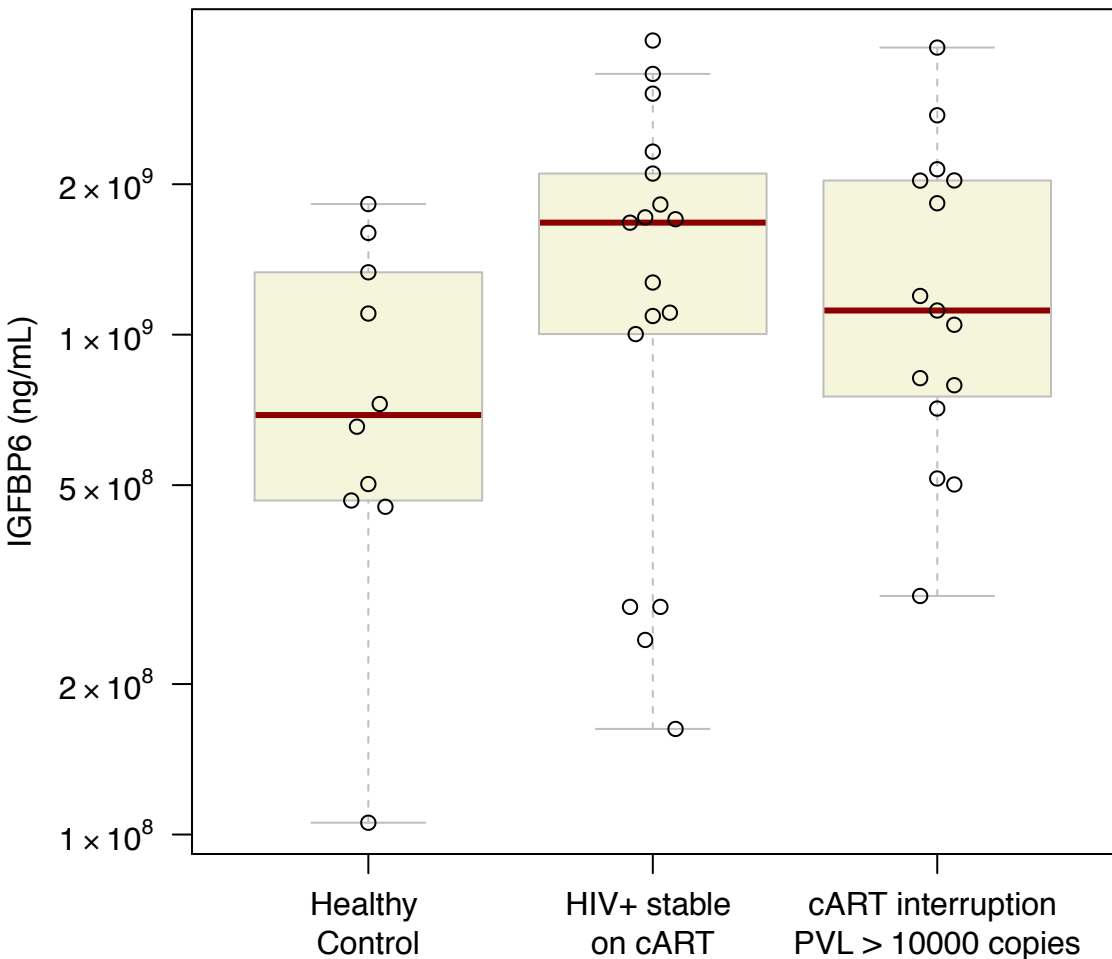

# Intercellular Adhesion Molecule 1 (ICAM-1)

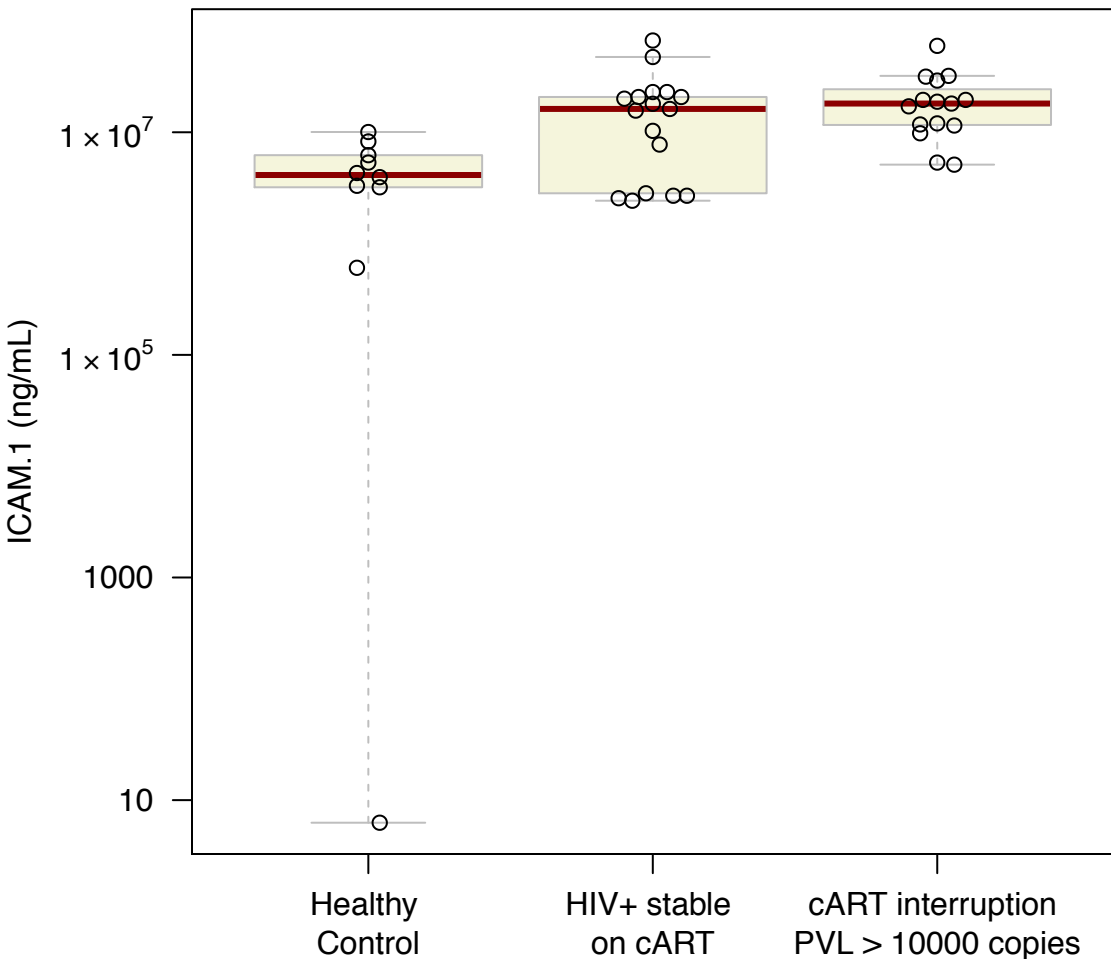



# Interferon gamma (IFN-gamma)

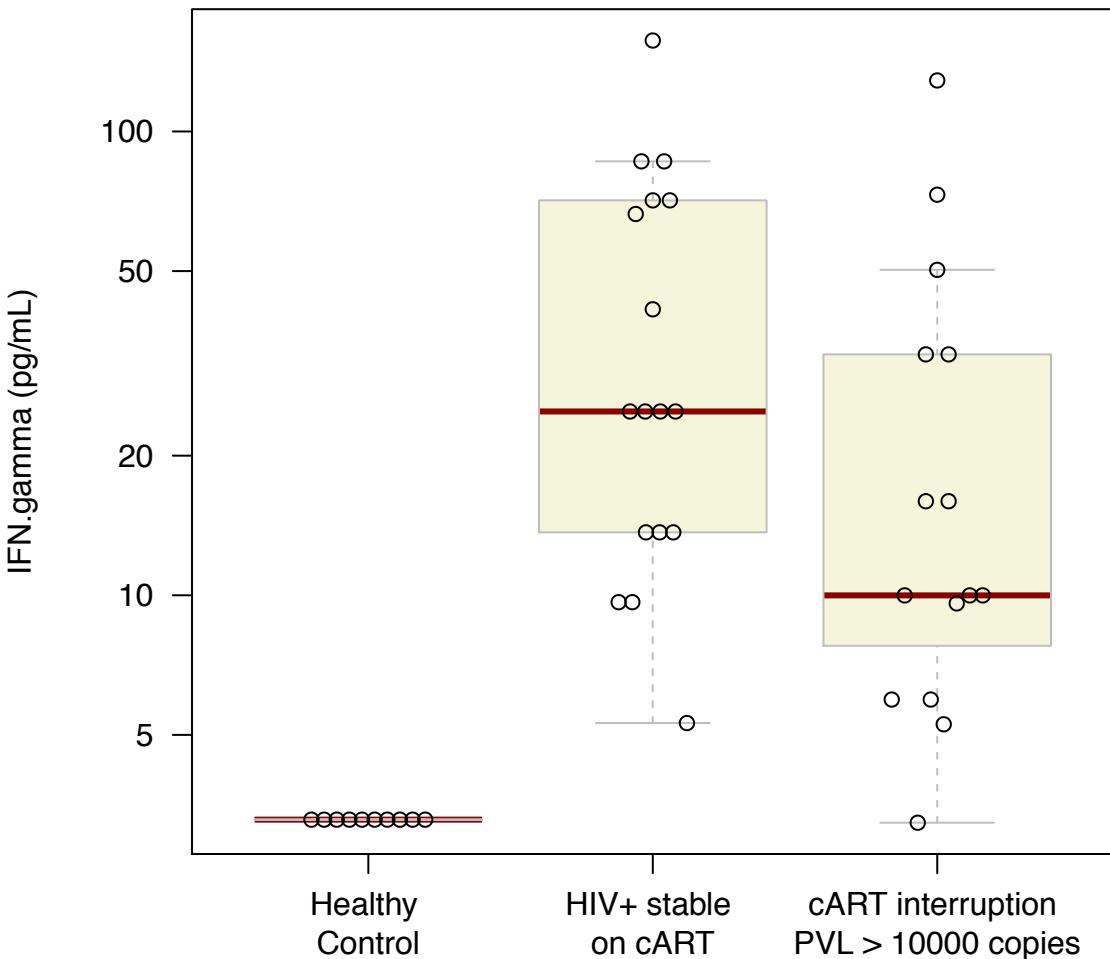

LLOQ: 1.5 pg/mL

# Interferon gamma Induced Protein 10 (IP-10)

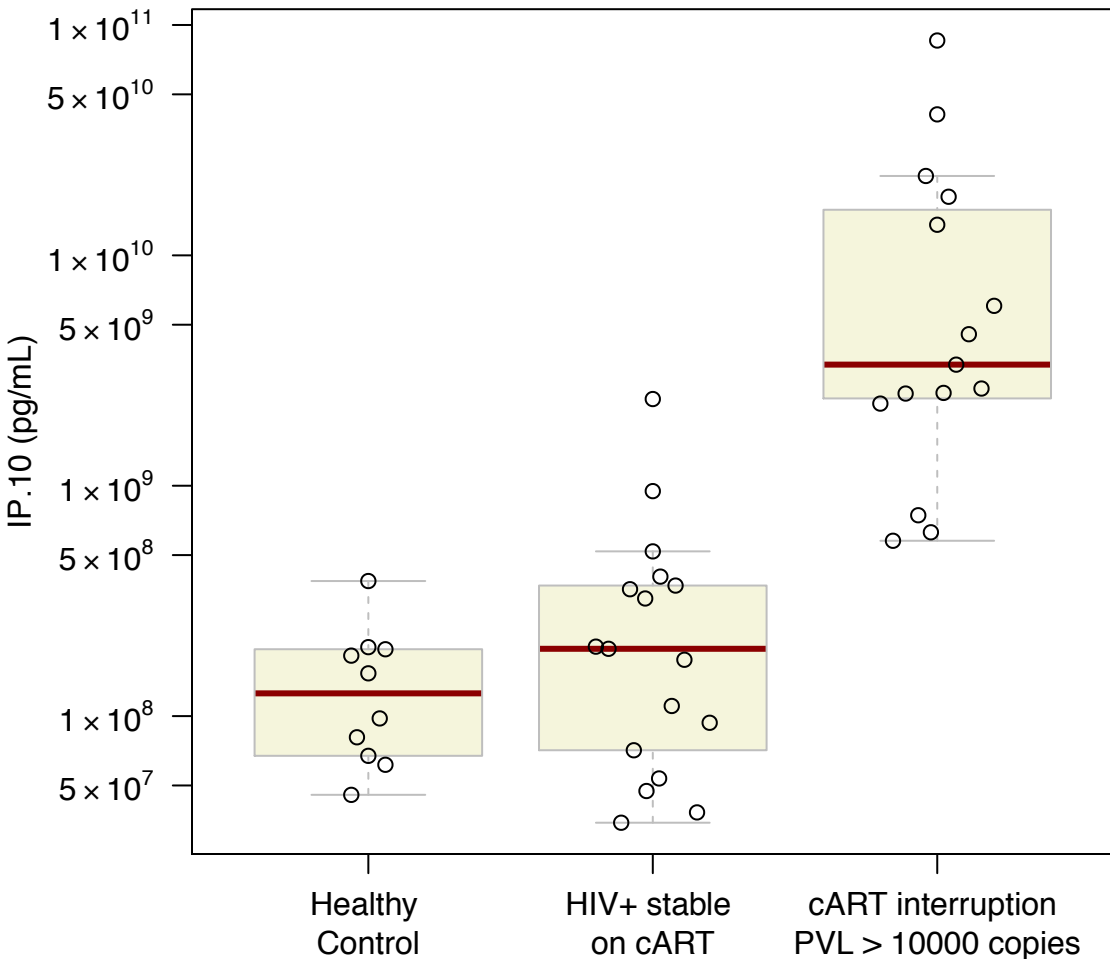

LLOQ: 127 pg/mL

# Interferon-inducible T-cell alpha chemoattractant (ITAC)

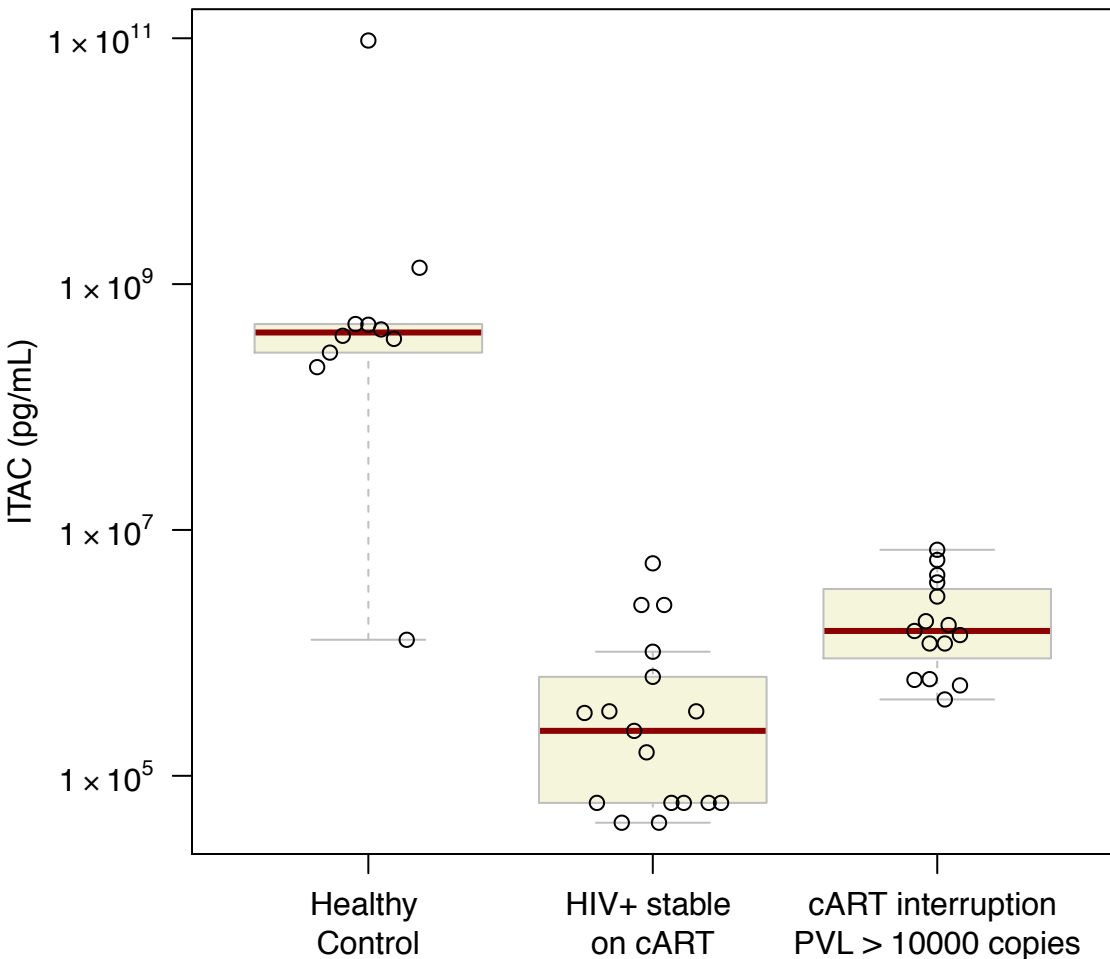

LLOQ: 21 pg/mL

# Interleukin-1 alpha (IL-1 alpha)

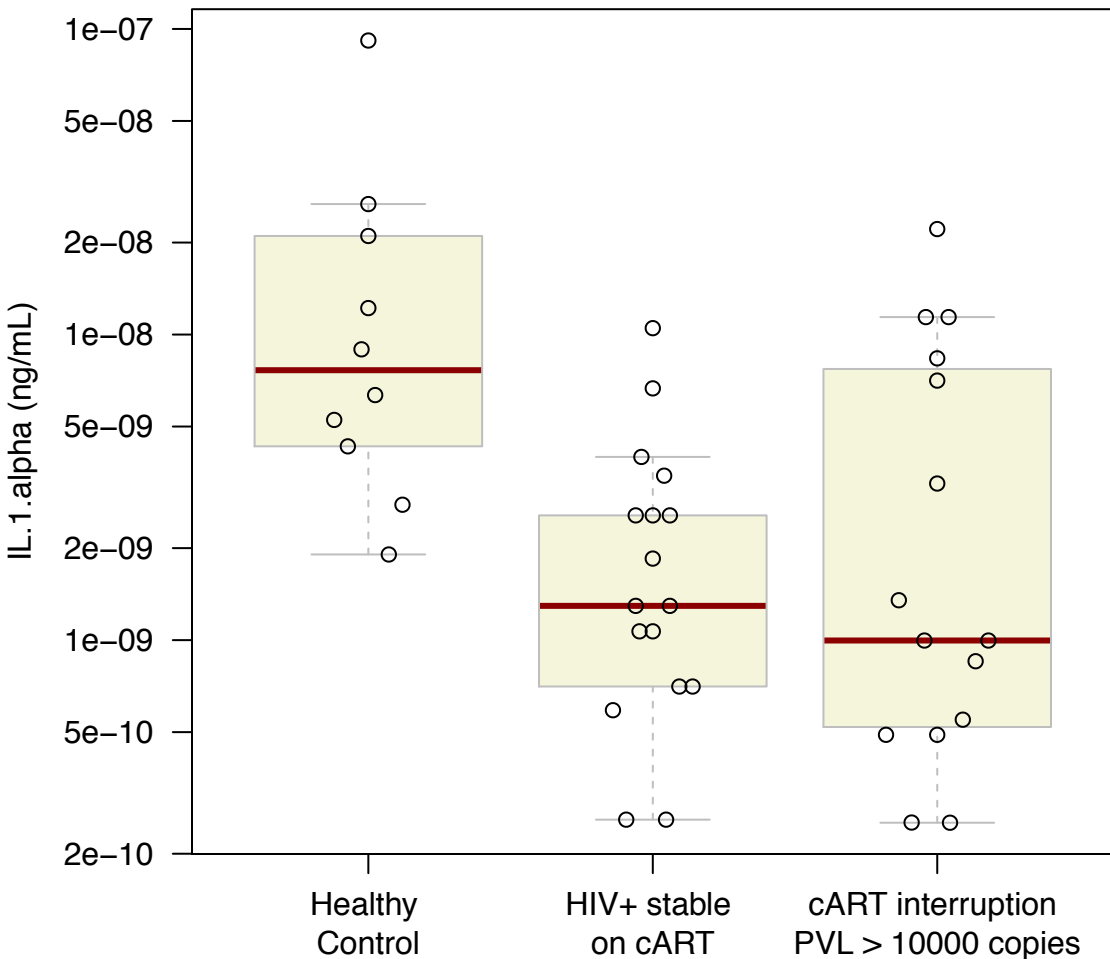

LLOQ: 0.0013 ng/mL

# Interleukin-1 receptor antagonist (IL-1ra)

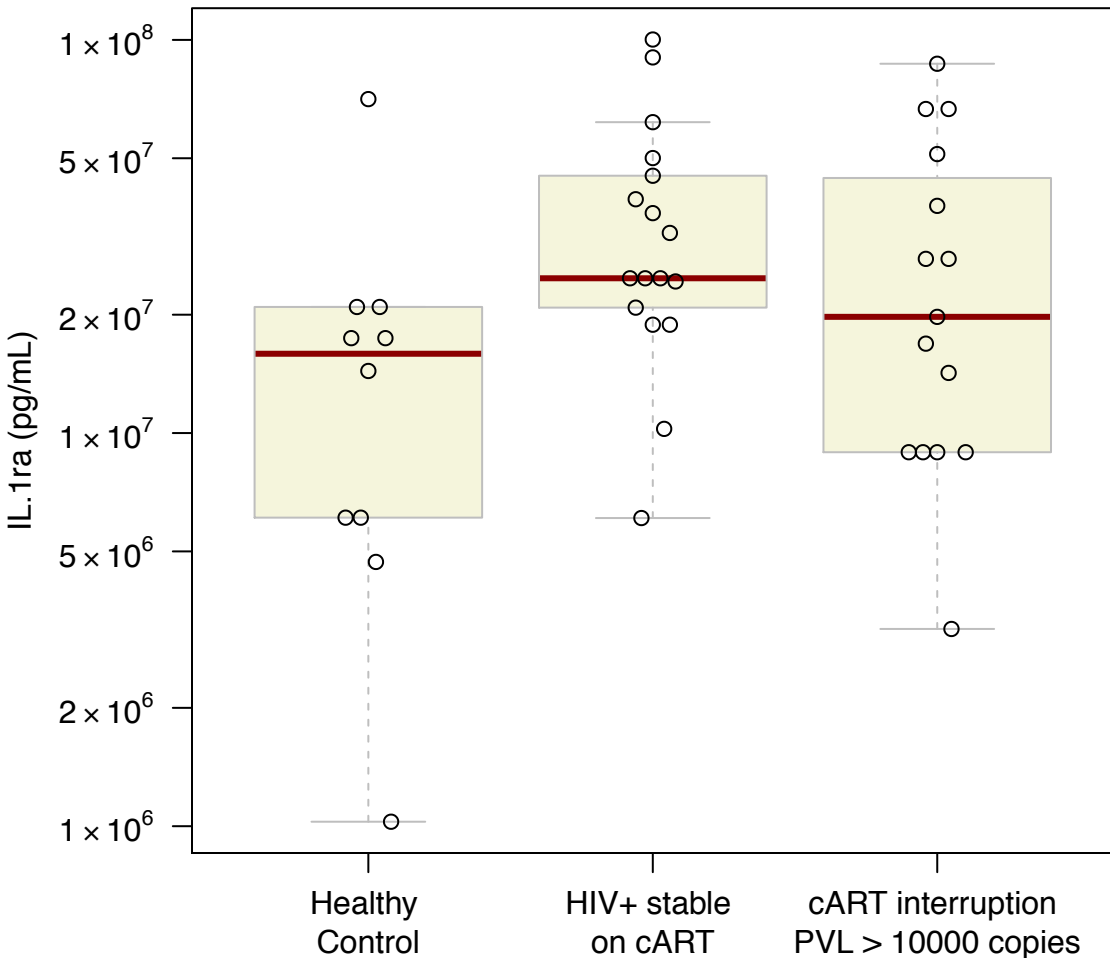

LLOQ: 67 pg/mL

# Interleukin-2 receptor alpha (IL-2 receptor alpha)

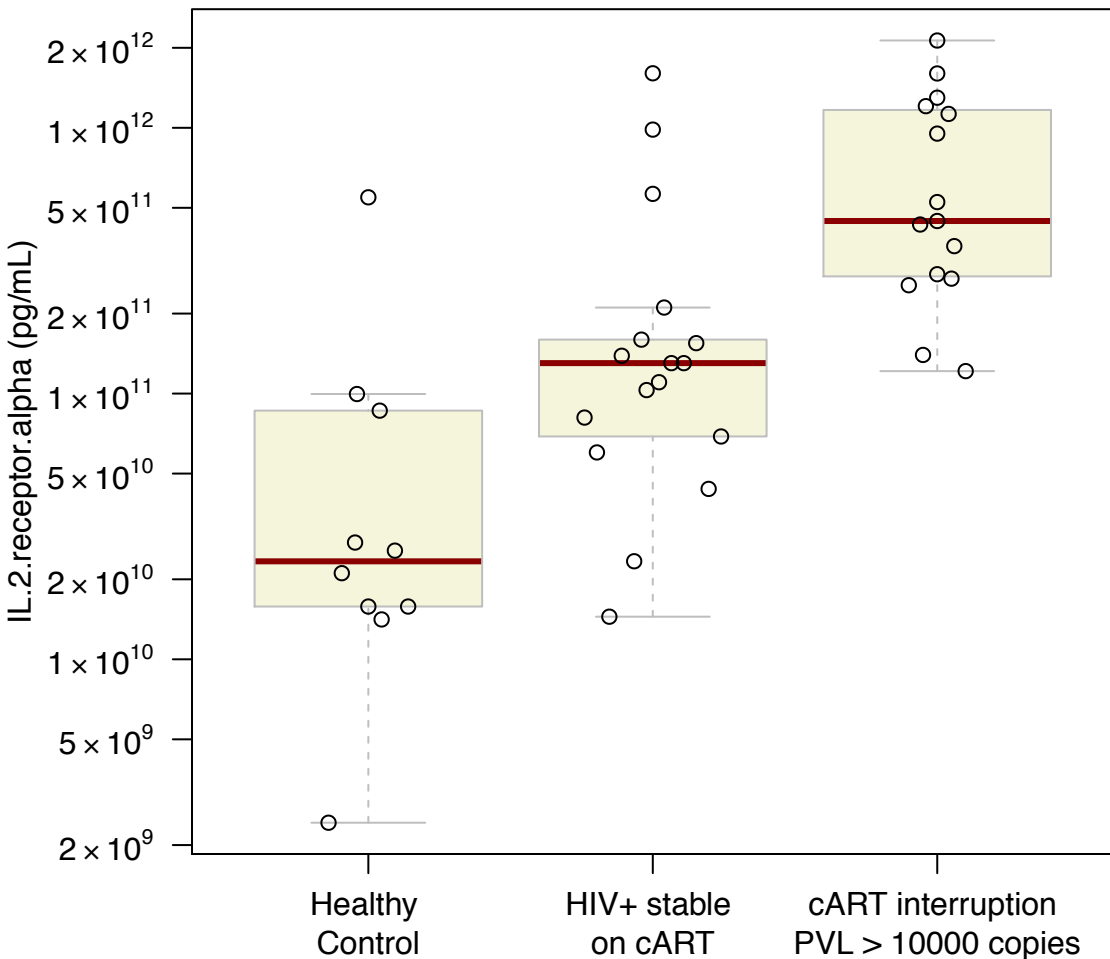

# Interleukin-6 receptor (IL-6r)

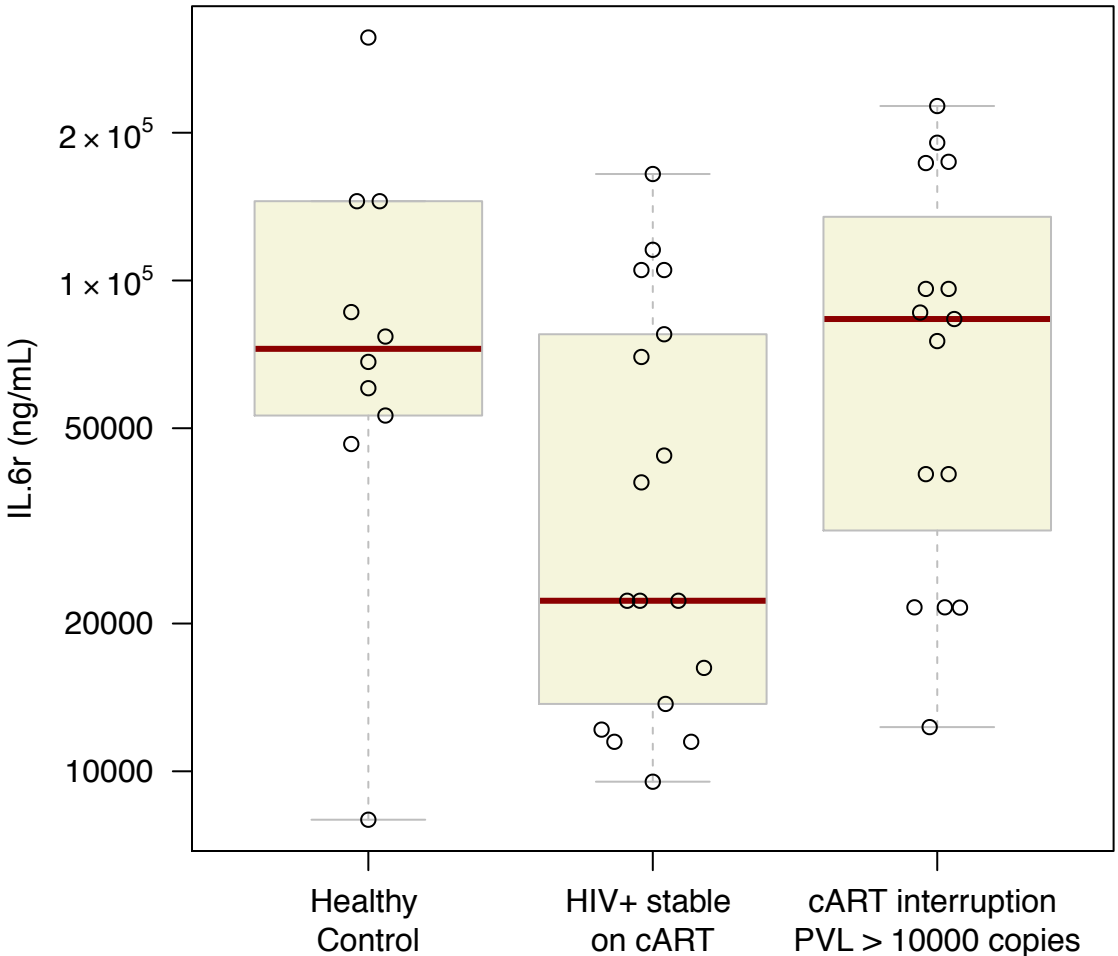

LLOQ: 0.027 ng/mL

# Interleukin-6 receptor subunit beta (IL-6R beta)

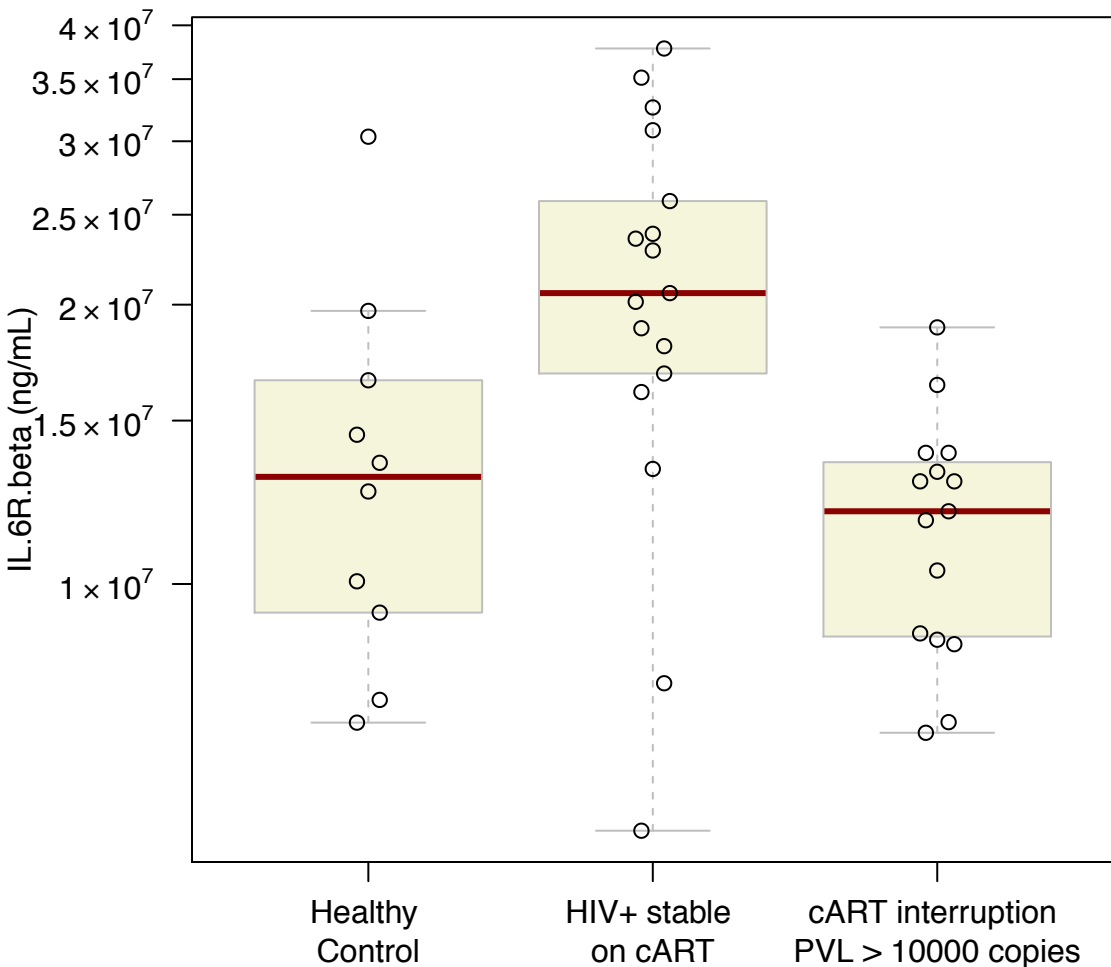

LLOQ: 25 ng/mL



# Interleukin-7 (IL-7)

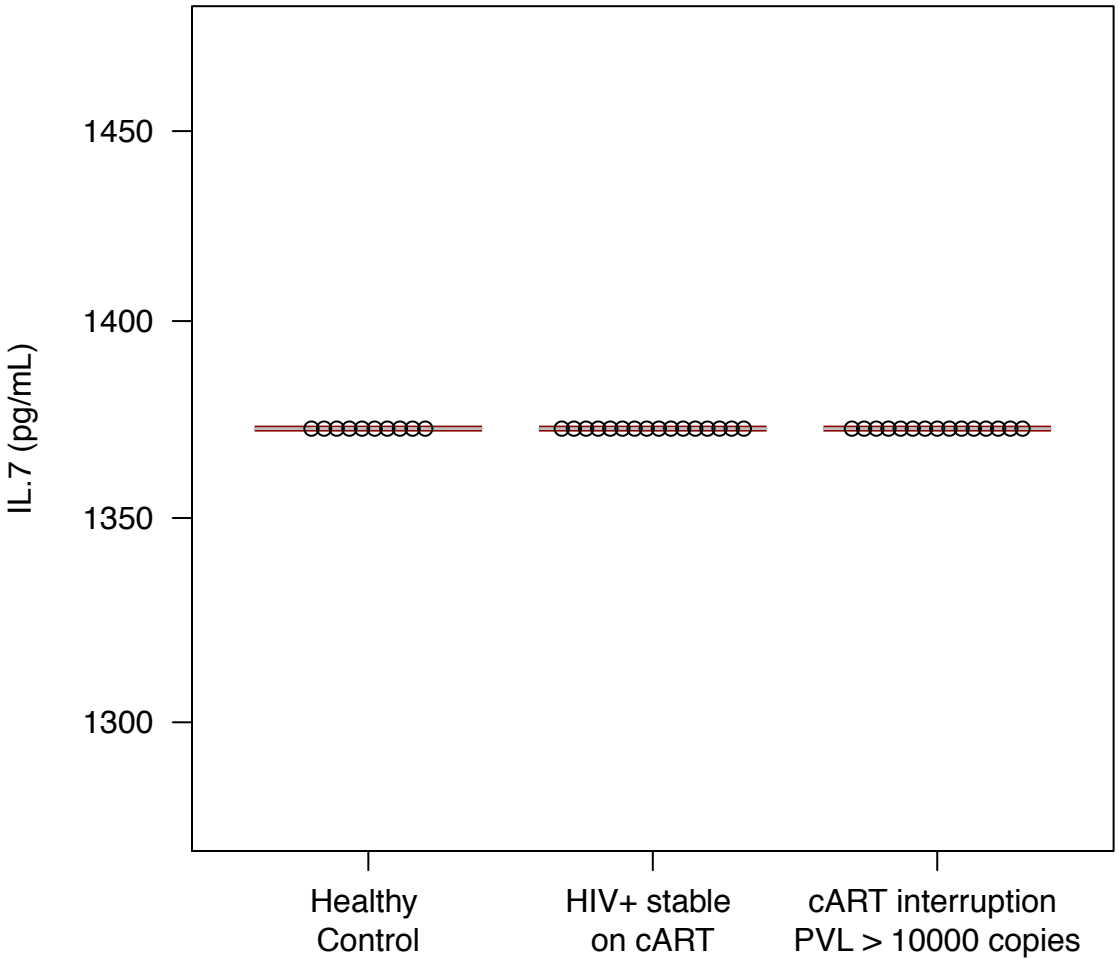

LLOQ: 8.8 pg/mL

# Interleukin-8 (IL-8)

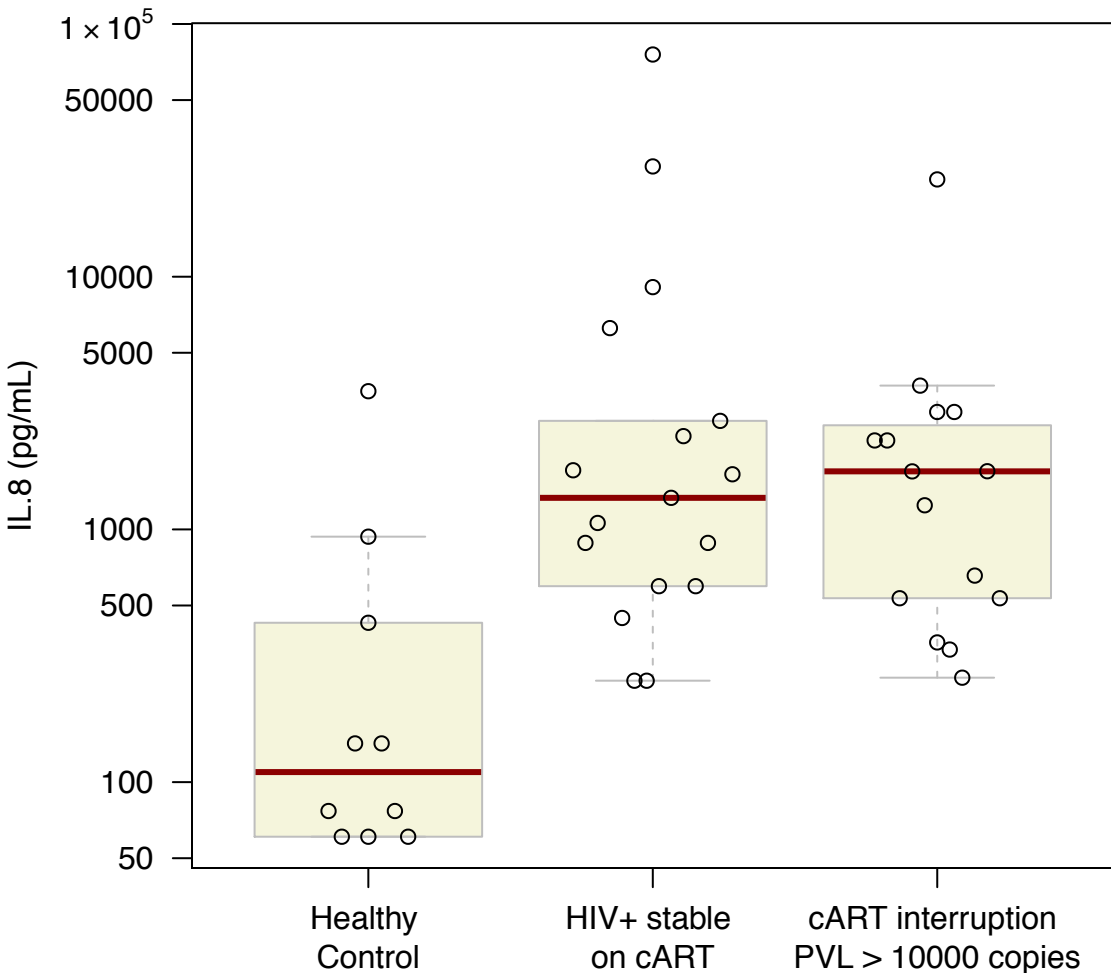

LLOQ: 4 pg/mL

# Interleukin-10 (IL-10)

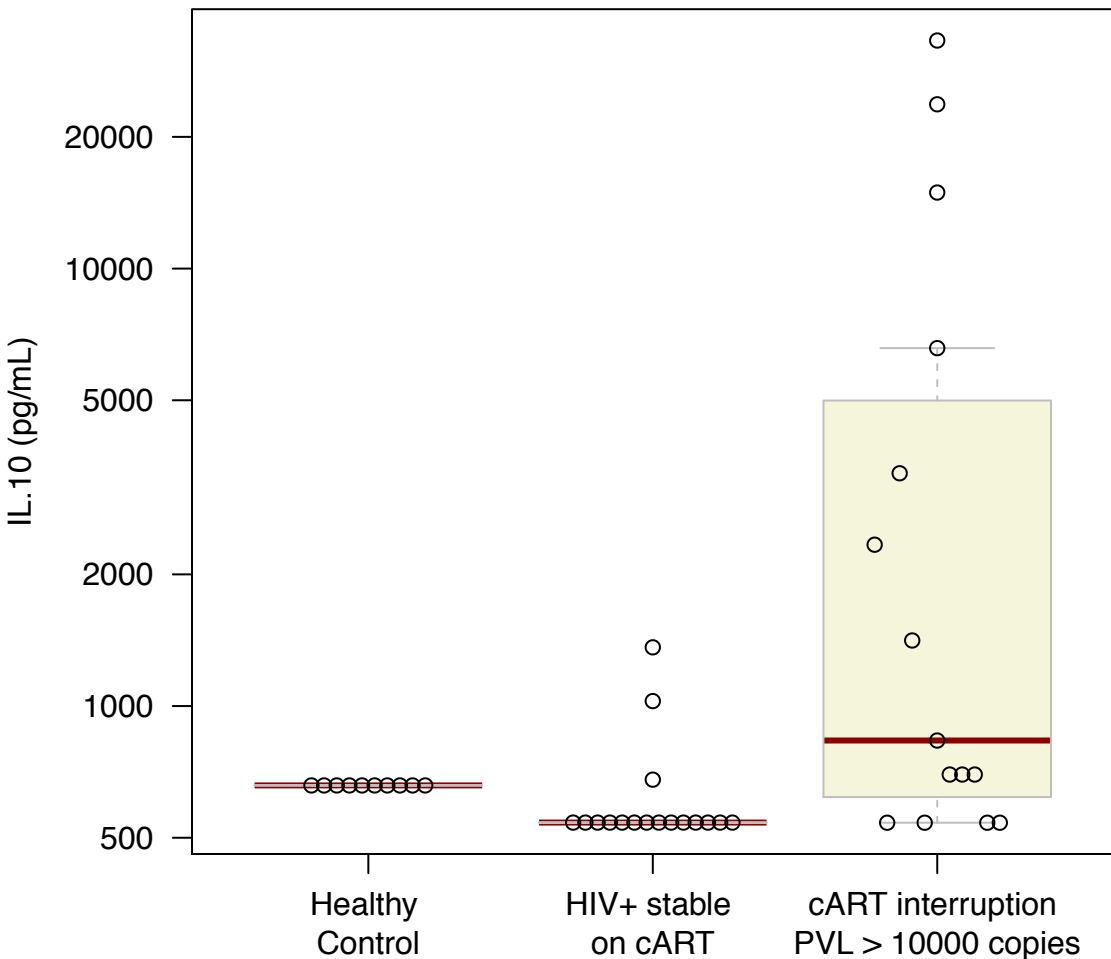

# Interleukin-12 Subunit p40 (IL-12p40)

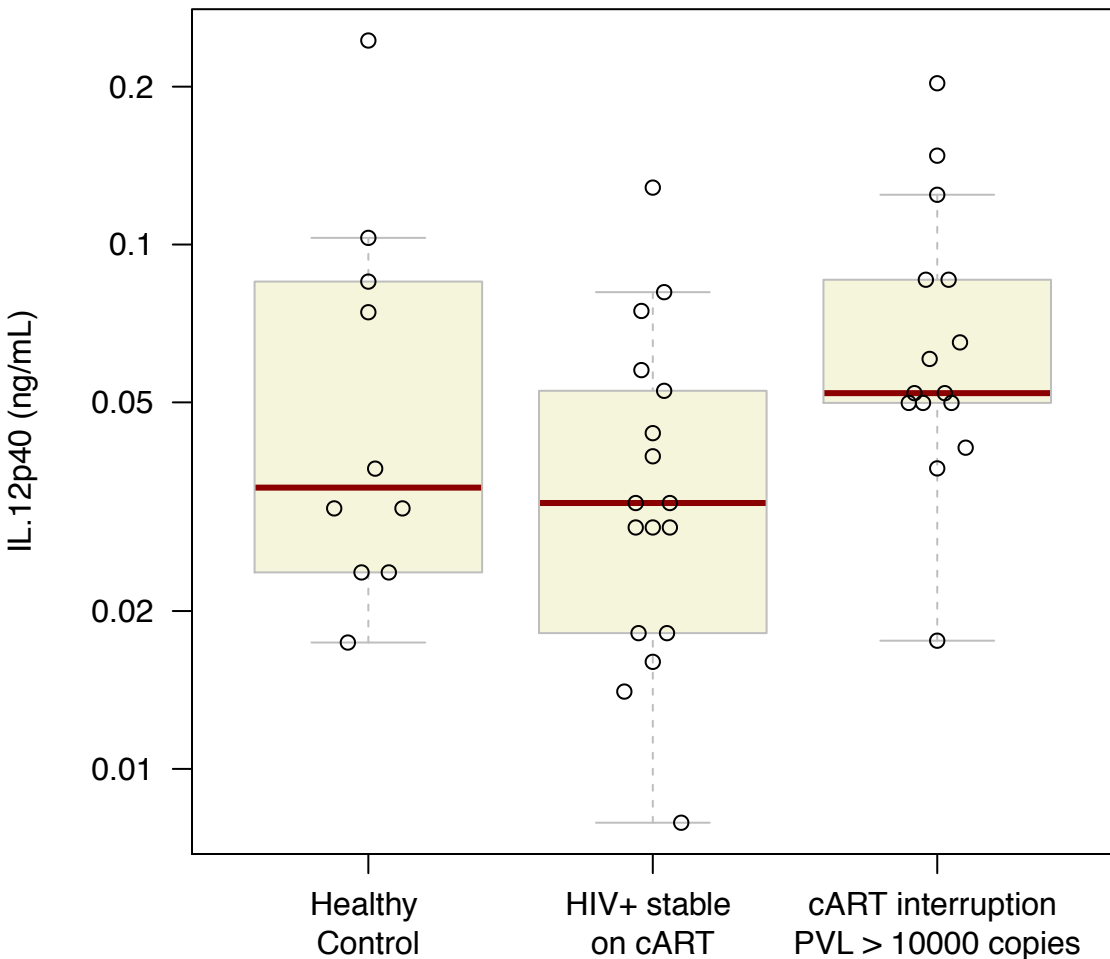

LLOQ: 0.14 ng/mL

# Interleukin-15 (IL-15)

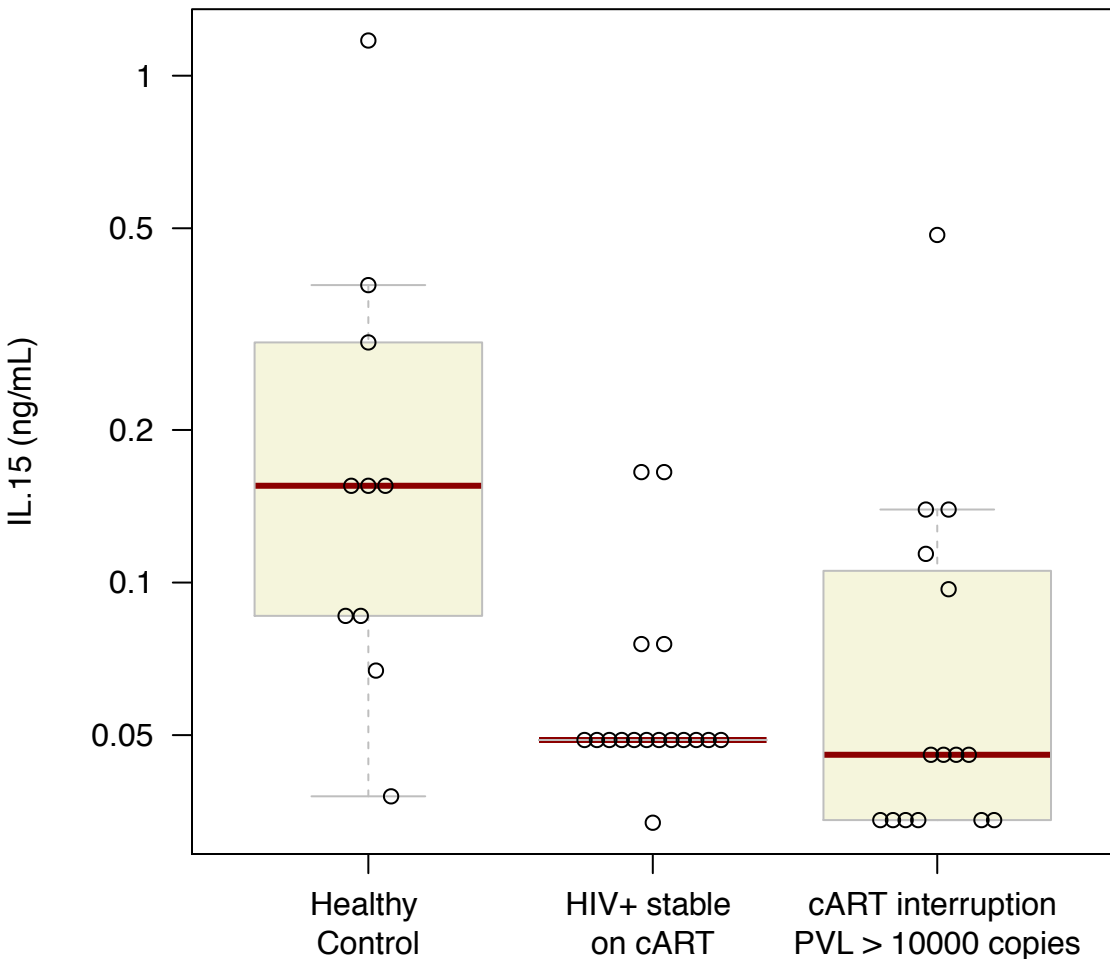

LLOQ: 0.37 ng/mL

# Interleukin-16 (IL-16)

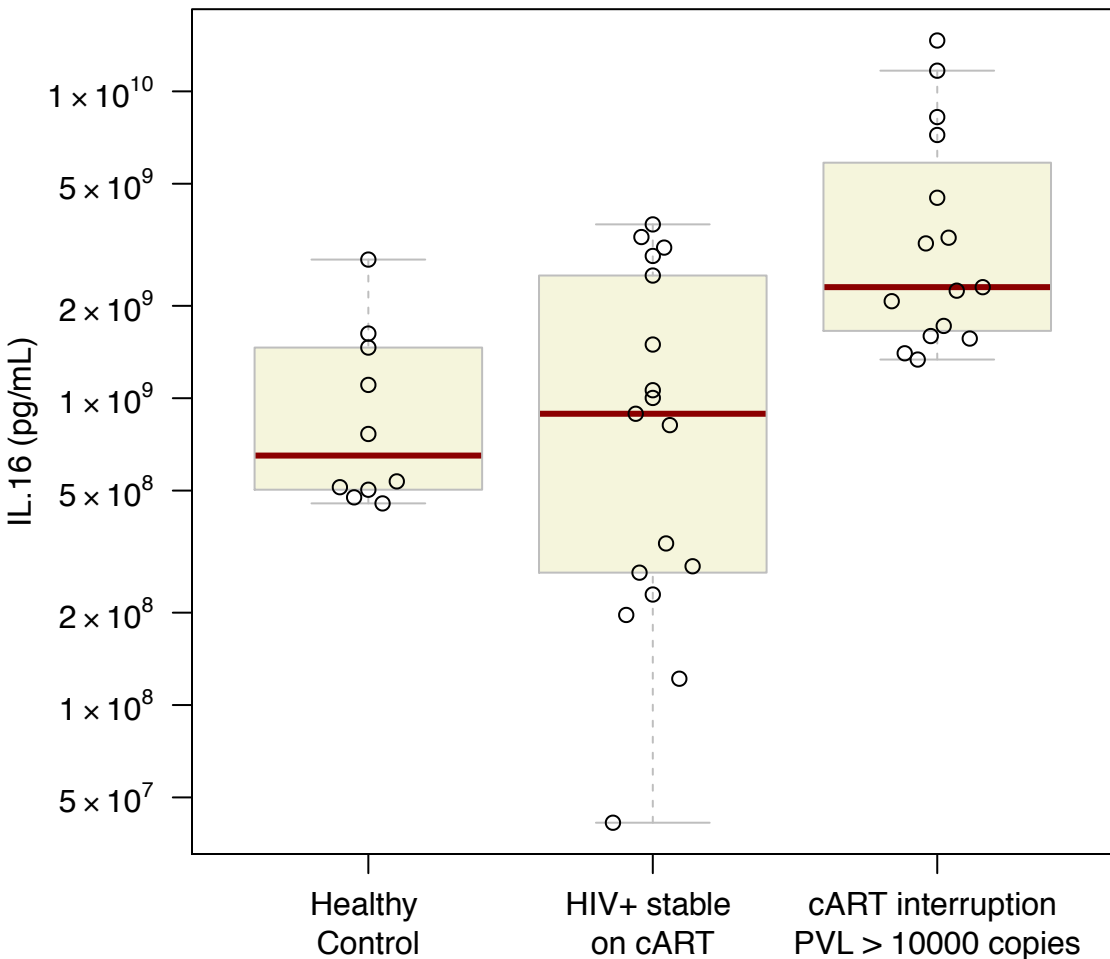

LLOQ: 87 pg/mL

# Interleukin-18 (IL-18)

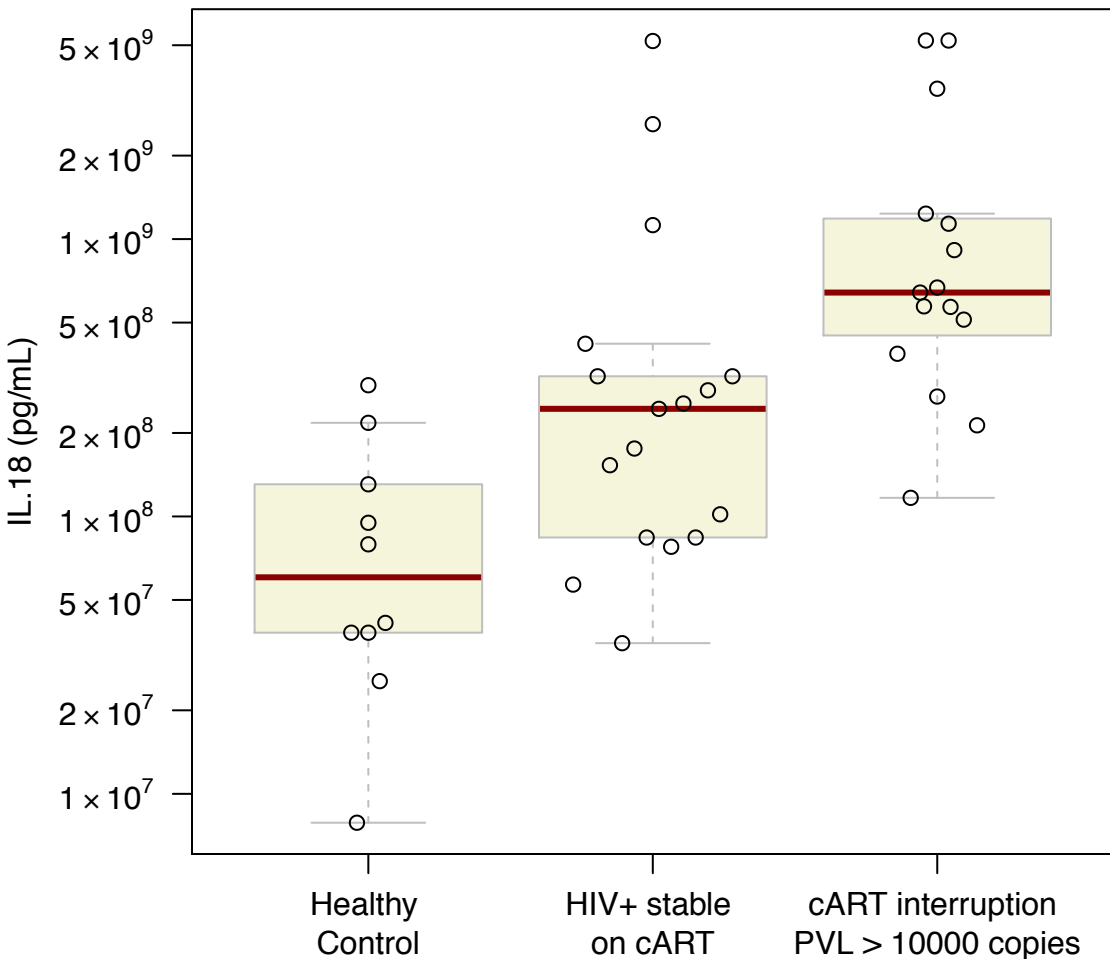

LLOQ: 41 pg/mL

# Interleukin-23 (IL-23)

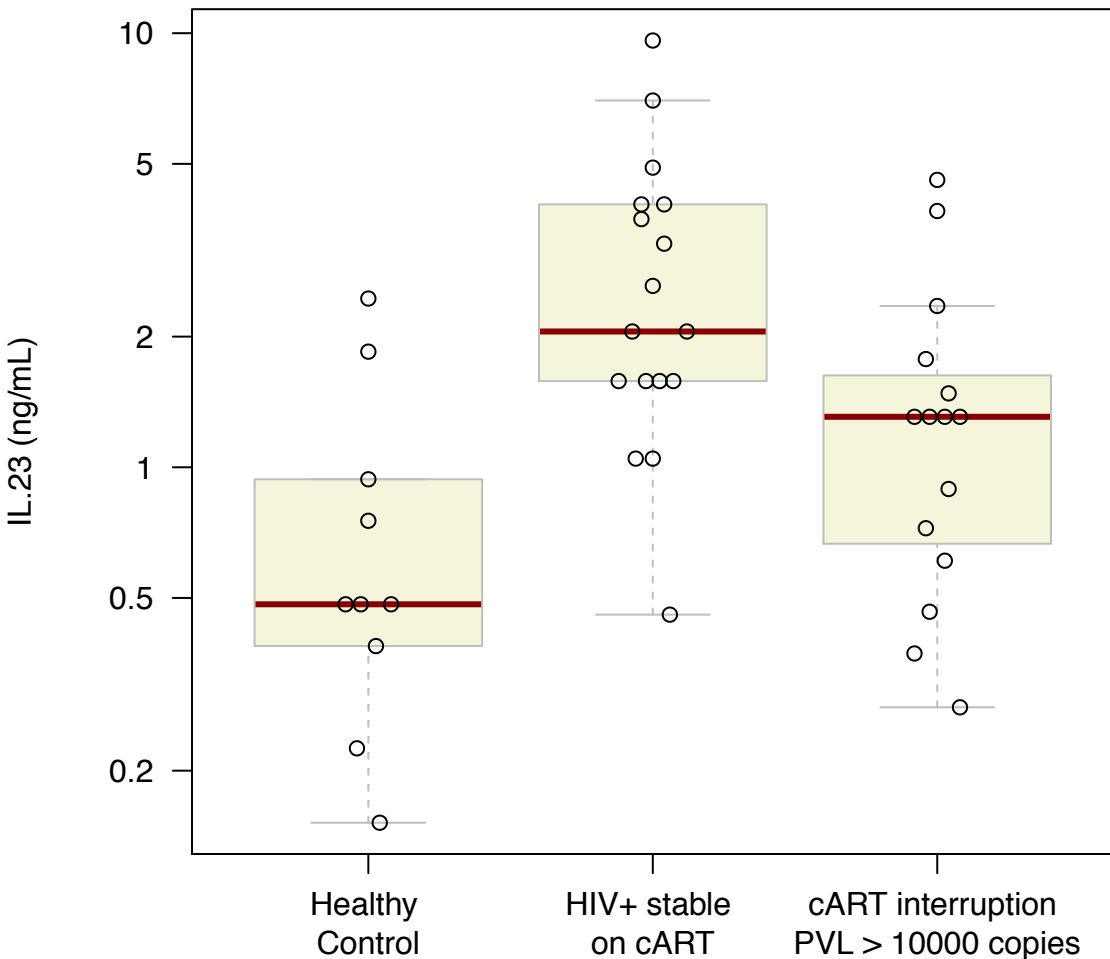

LLOQ: 0.59 ng/mL



# Kallikrein 5

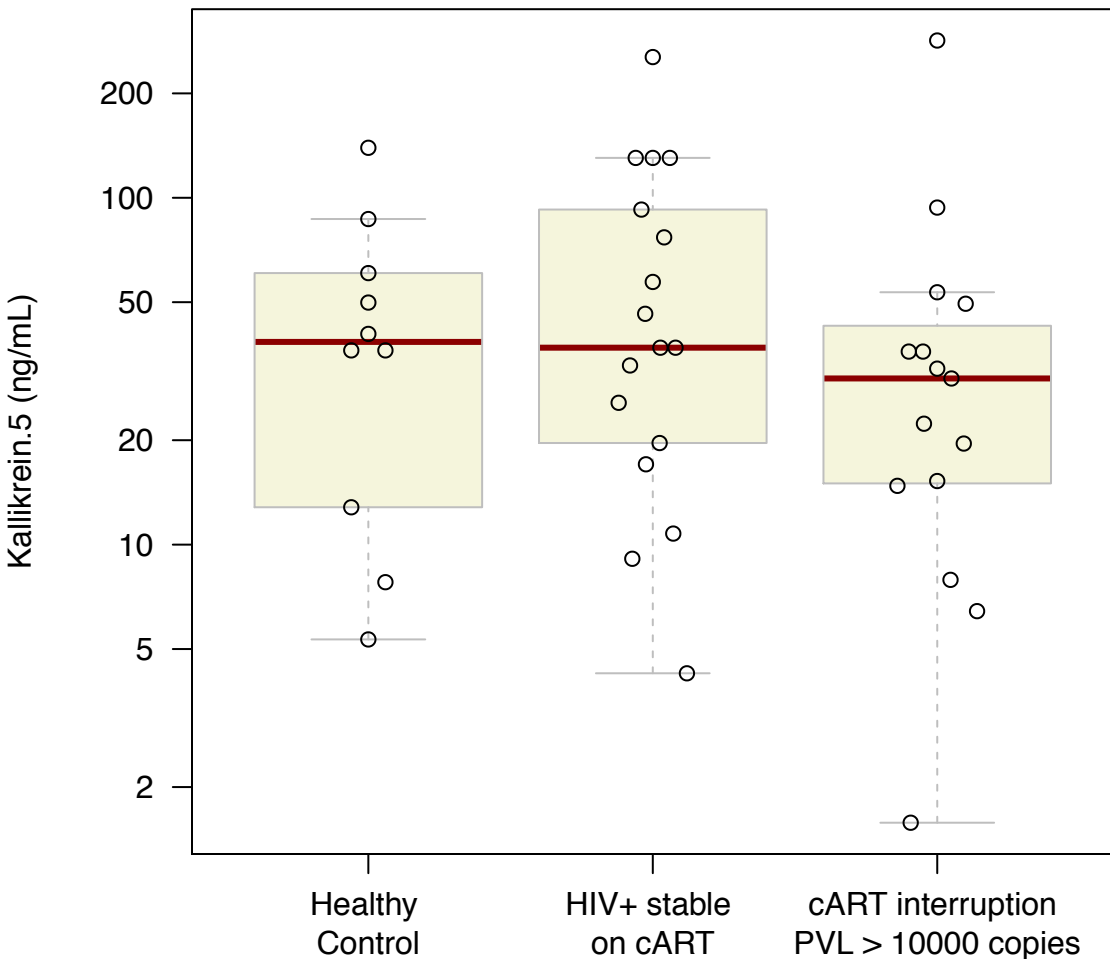

LLOQ: 0.72 ng/mL

# Kidney Injury Molecule-1 (KIM-1)

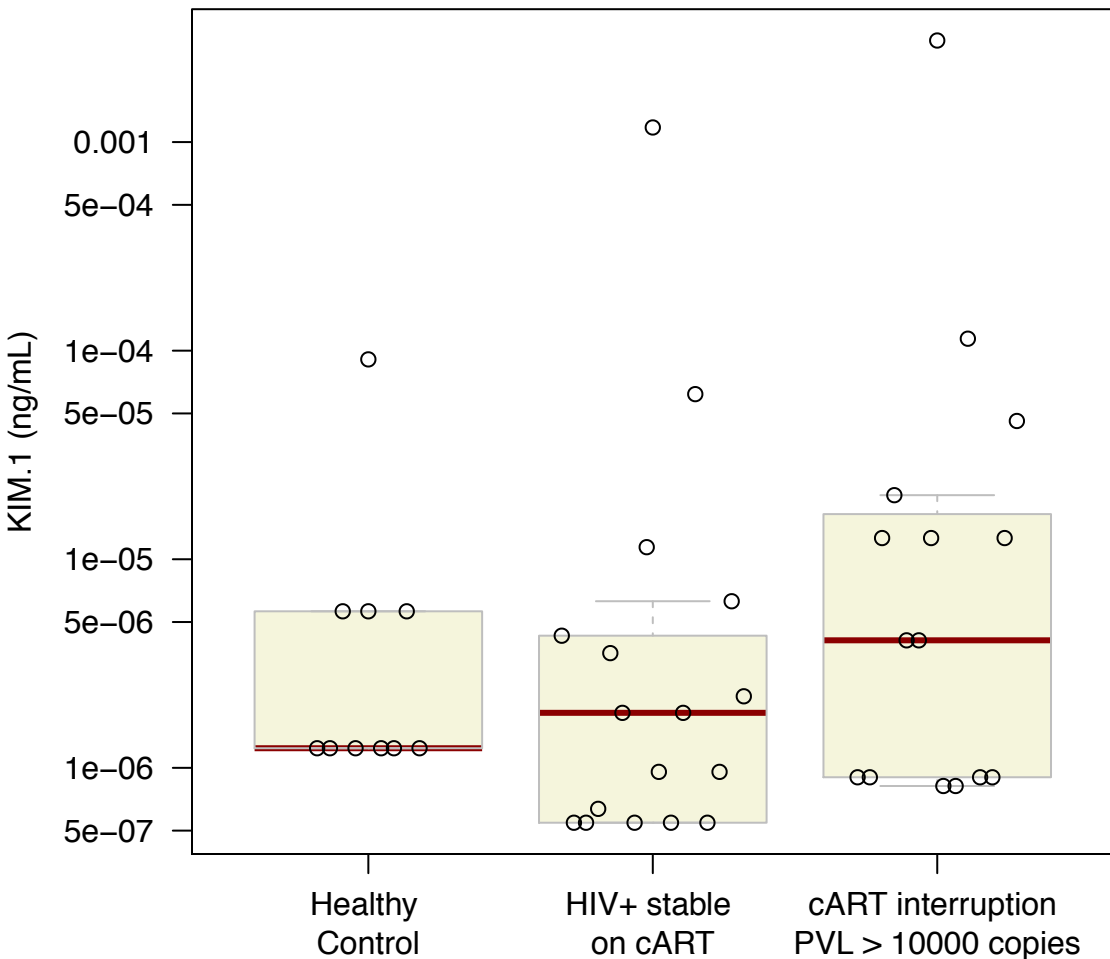

LLOQ: 0.015 ng/mL

# Lactoylglutathione lyase (LGL)

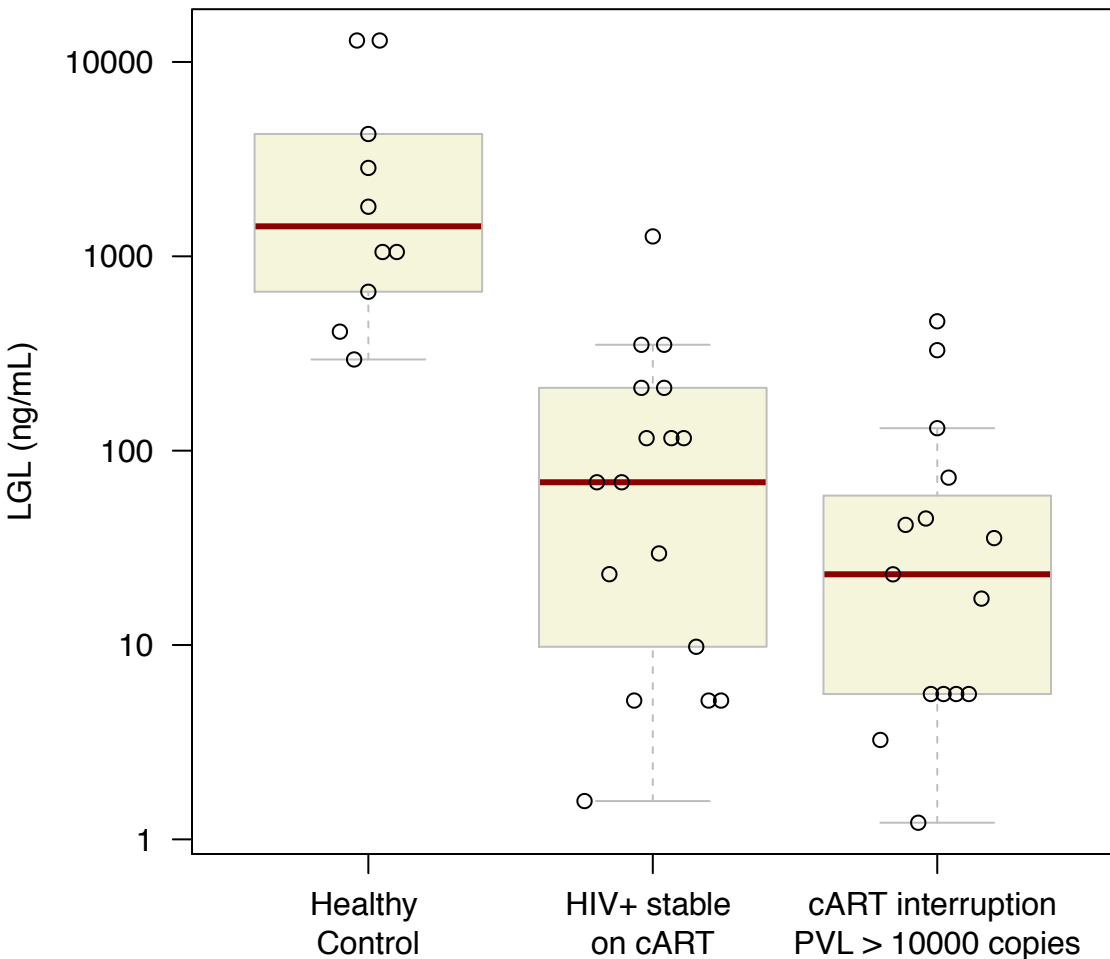

LLOQ: 0.92 ng/mL

# Associated Peptide of Transforming Growth Factor beta

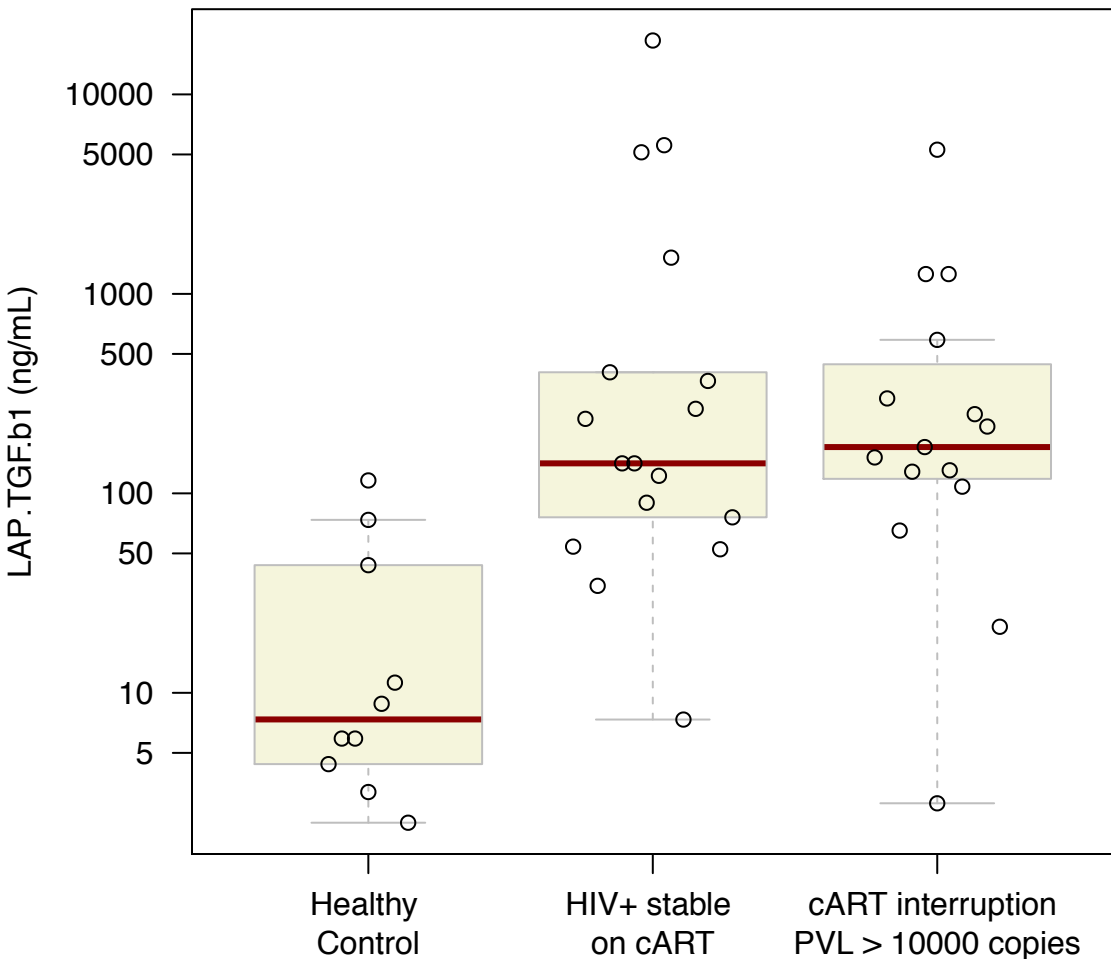

# Leptin

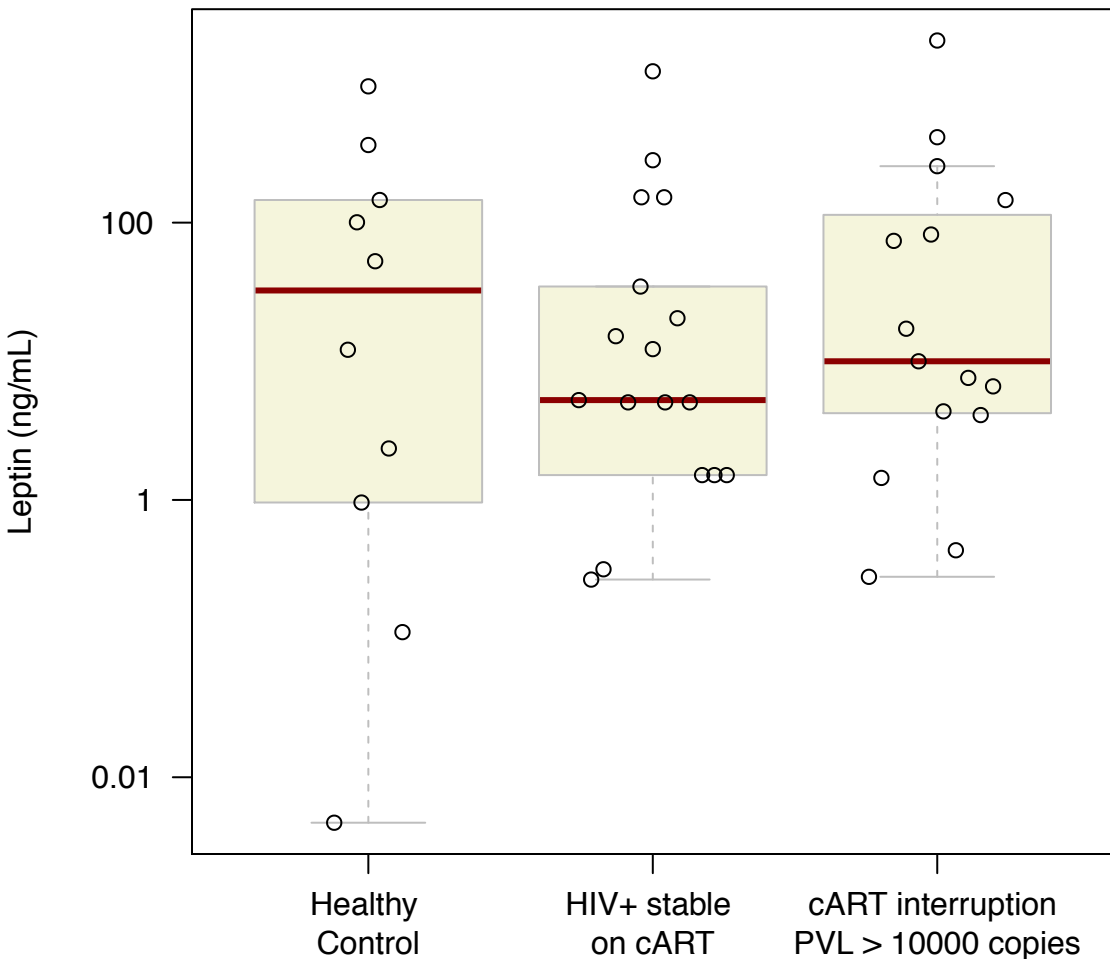

LLOQ: 0.13 ng/mL

# Luteinizing Hormone (LH)

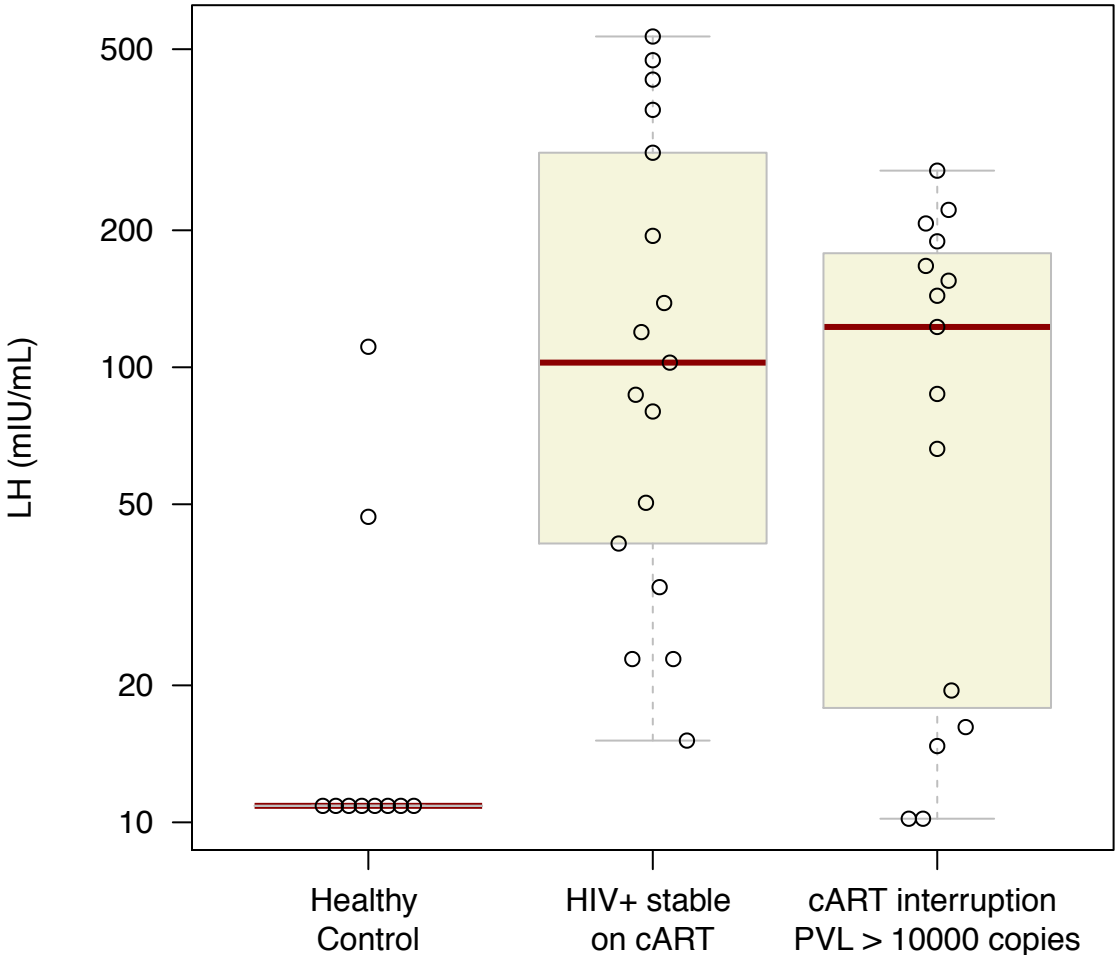

LLOQ: 2.1 mIU/mL

# Macrophage Colony-Stimulating Factor 1 (M-CSF)

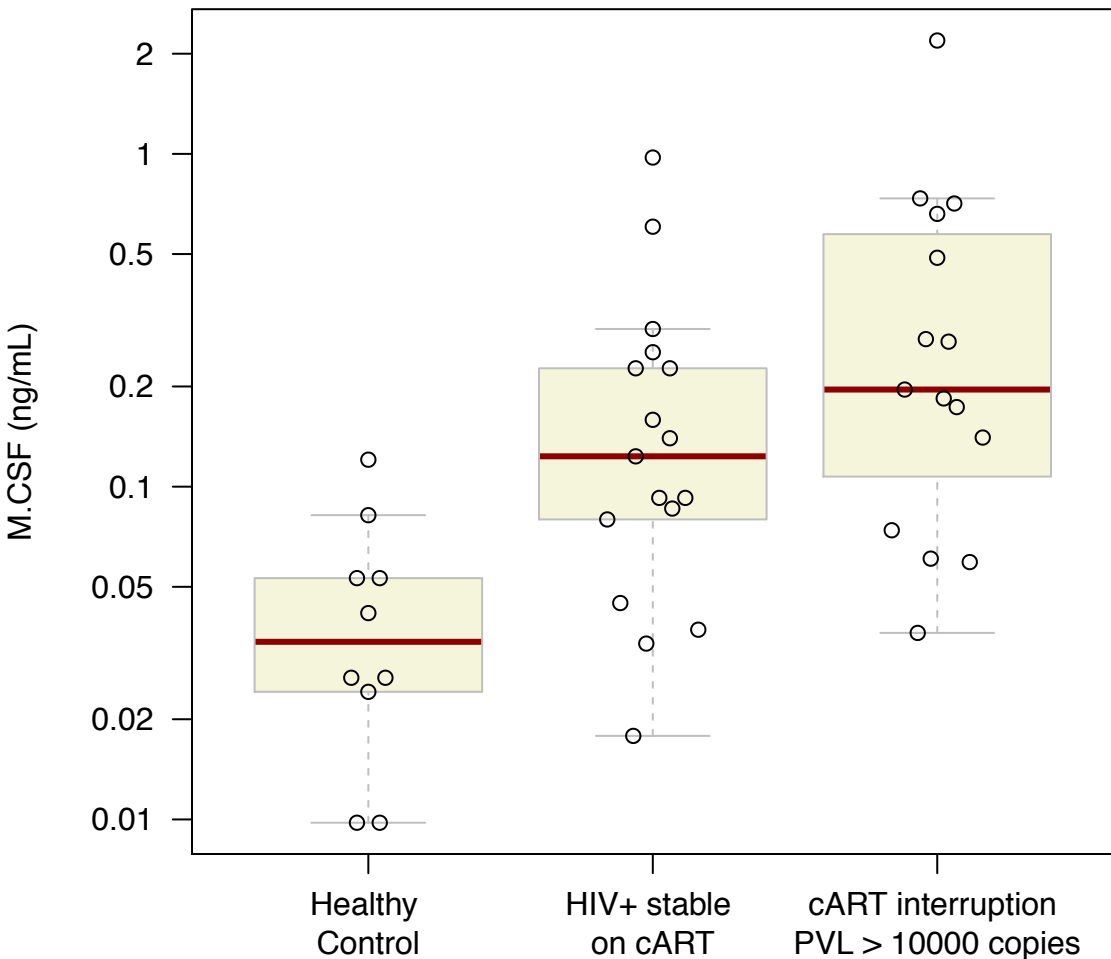

LLOQ: 0.25 ng/mL

# Macrophage-Derived Chemokine (MDC)

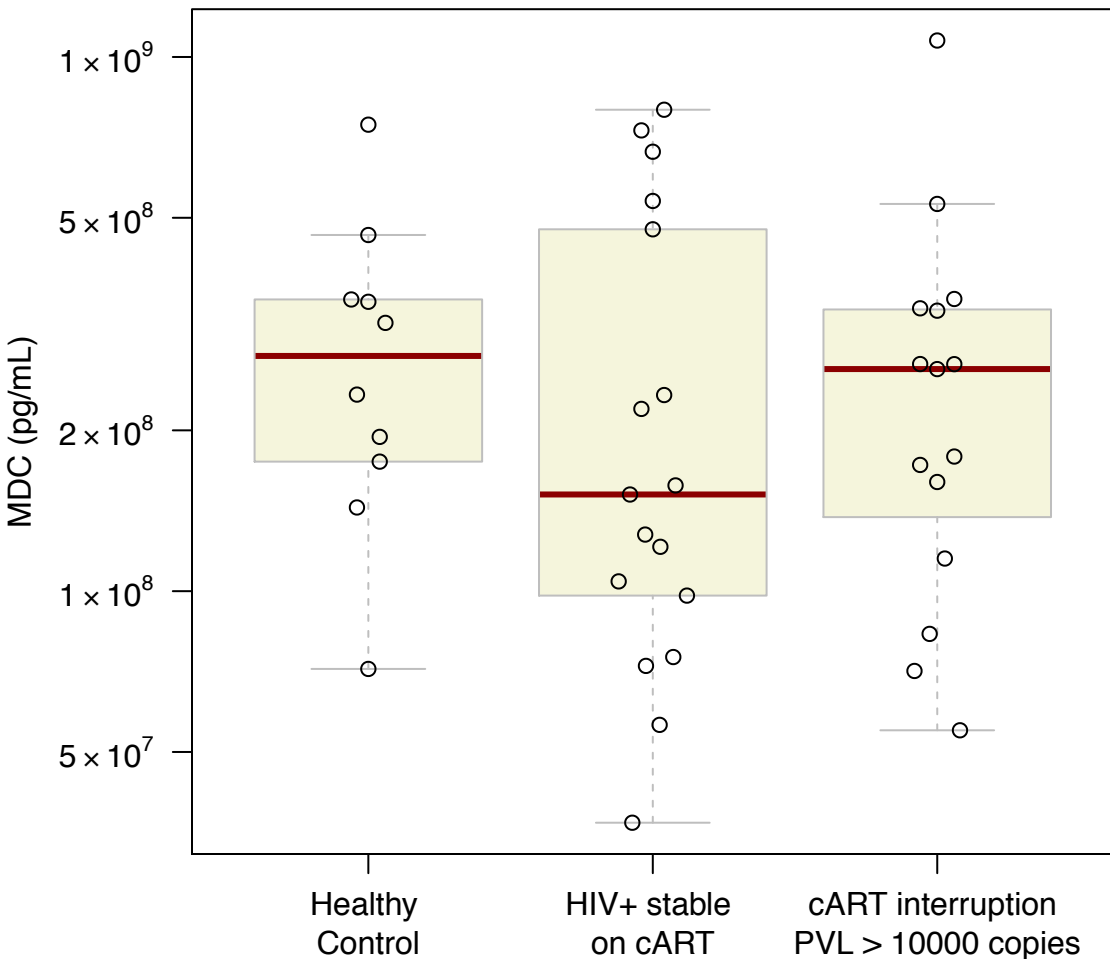

LLOQ: 19 pg/mL



# Macrophage Inflammatory Protein-1 beta (MIP-1 beta)

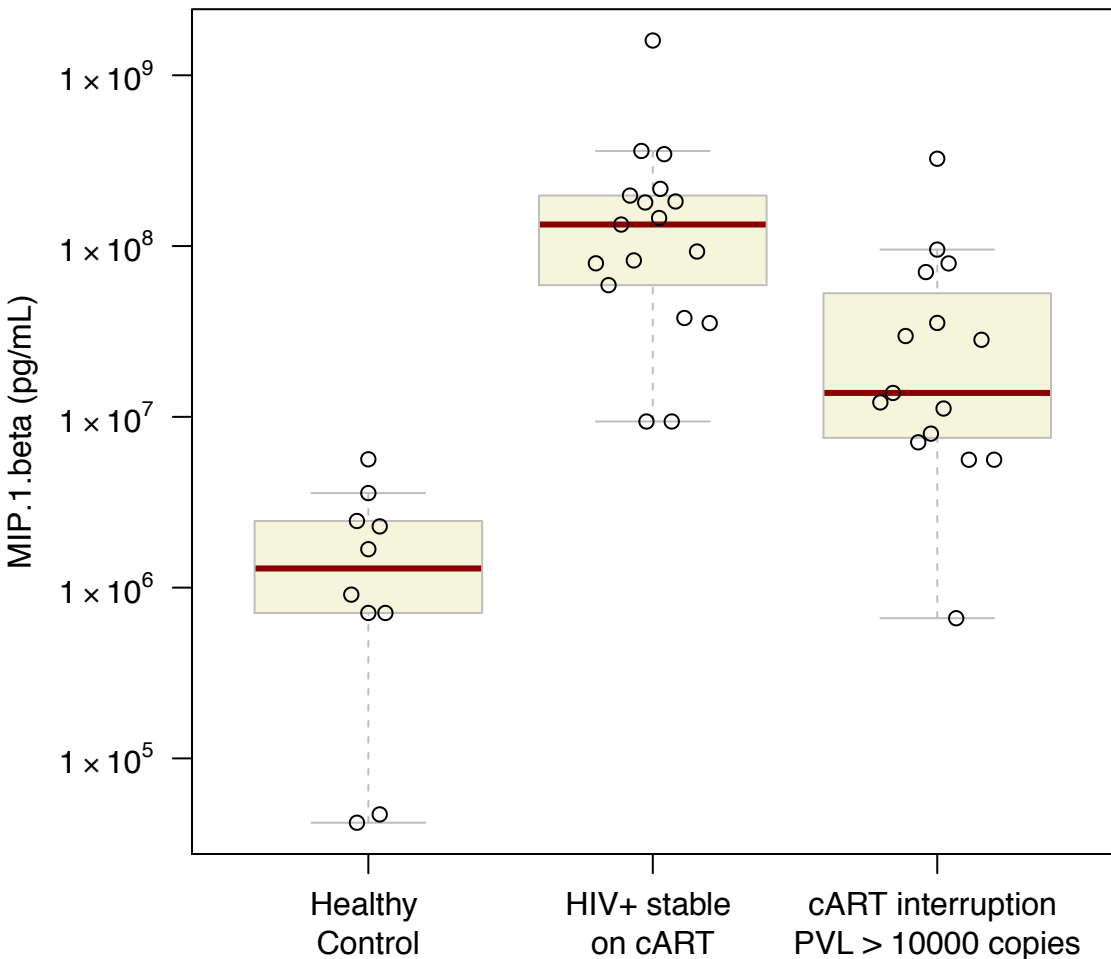

LLOQ: 31 pg/mL

# Macrophage Inflammatory Protein-3 alpha (MIP-3 alpha)

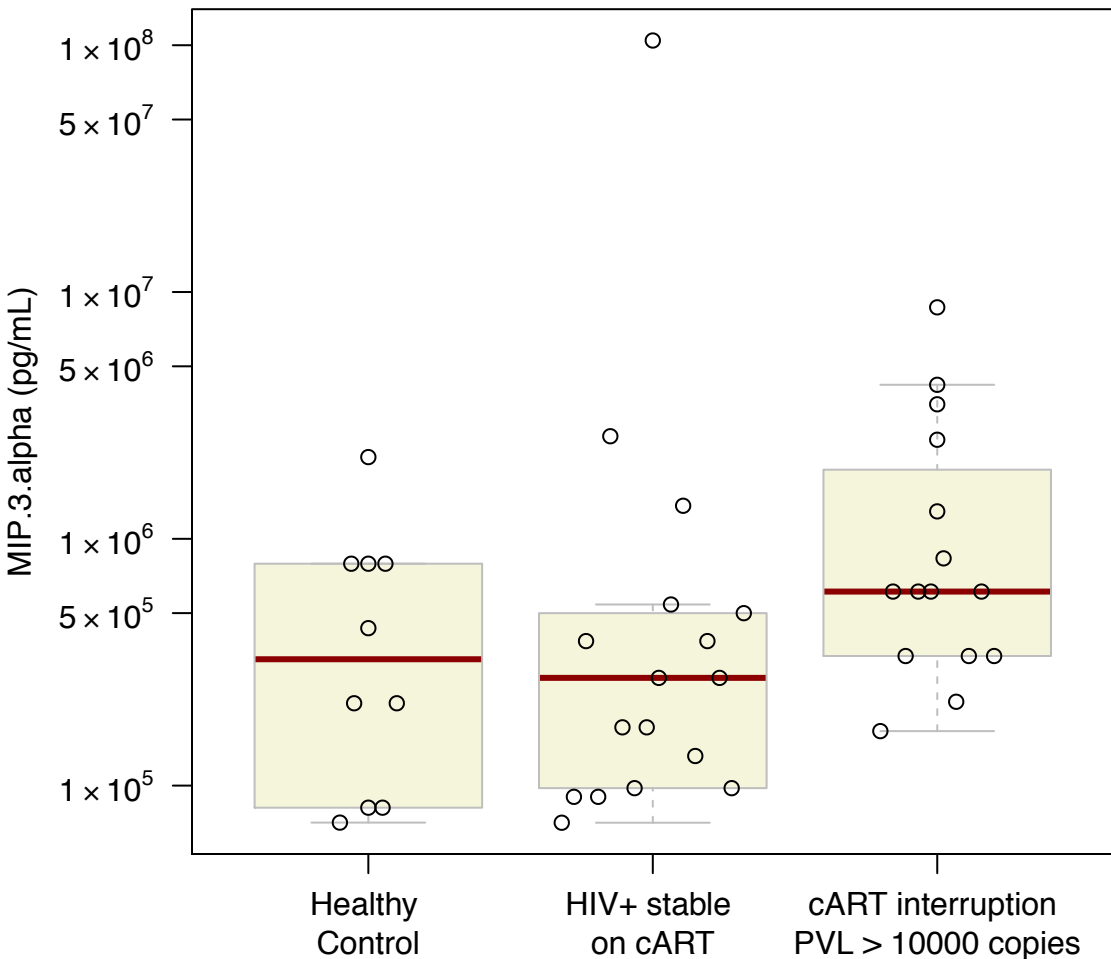

LLOQ: 30 pg/mL

# Macrophage inflammatory protein 3 beta (MIP-3 beta)

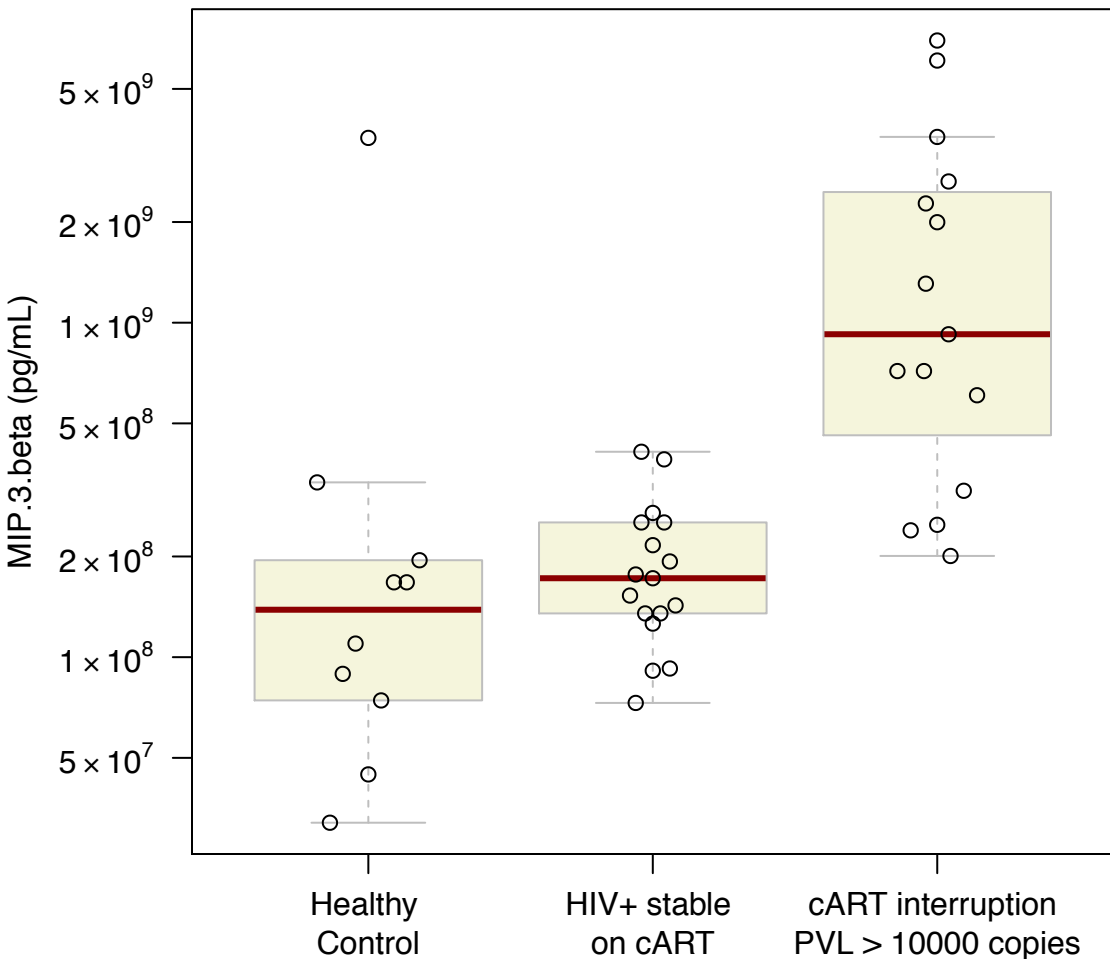

LLOQ: 39 pg/mL

# Macrophage Migration Inhibitory Factor (MIF)

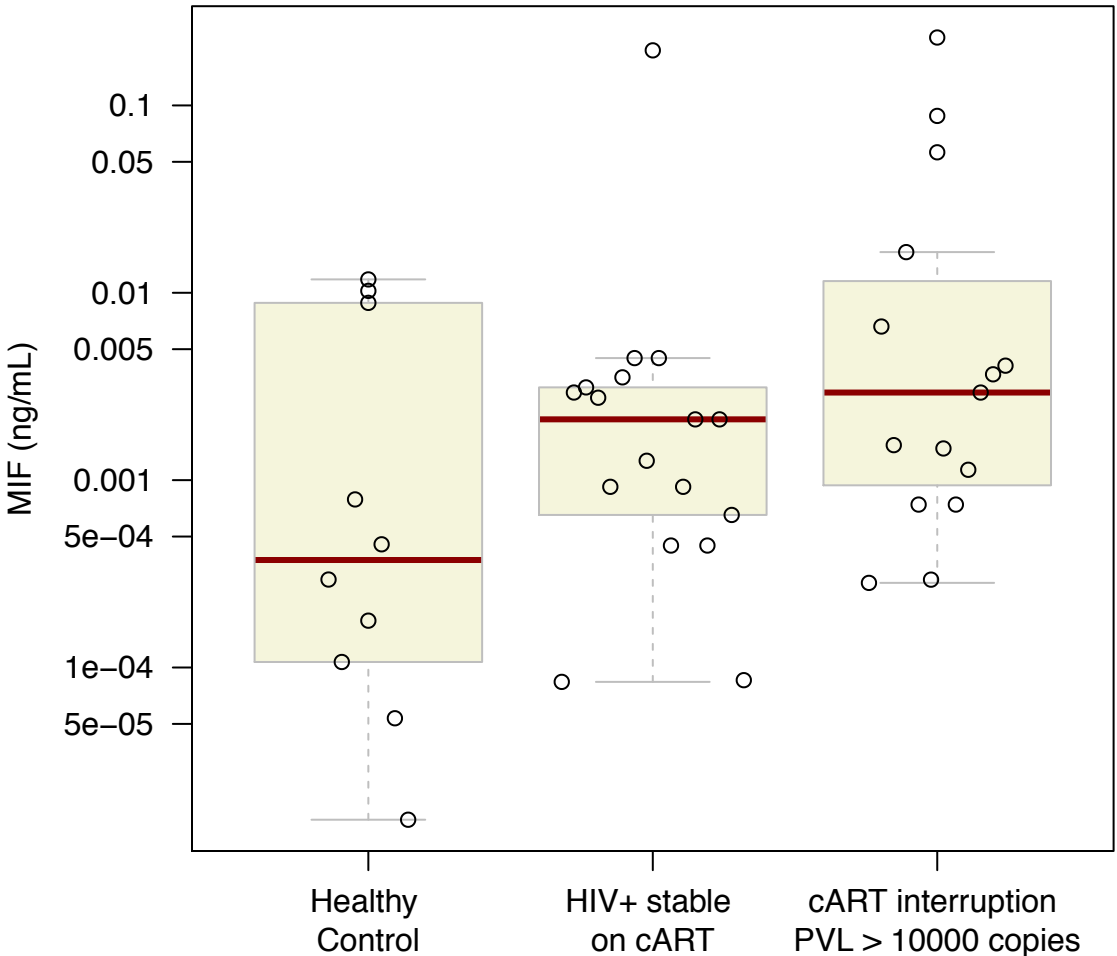

# Macrophage-Stimulating Protein (MSP)

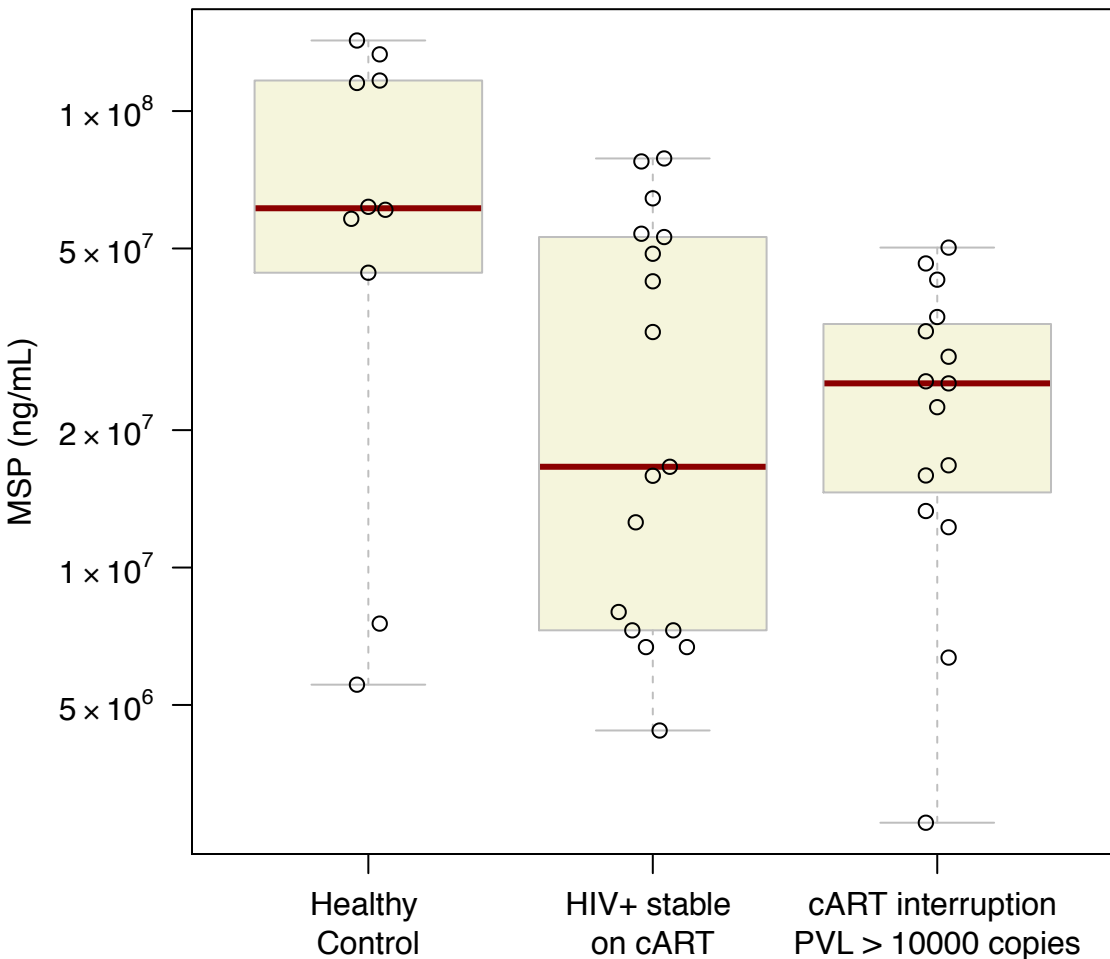

LLOQ: 26 ng/mL

# Malondialdehyde-Modified Low-Density Lipoprotein (MDA-LDL)

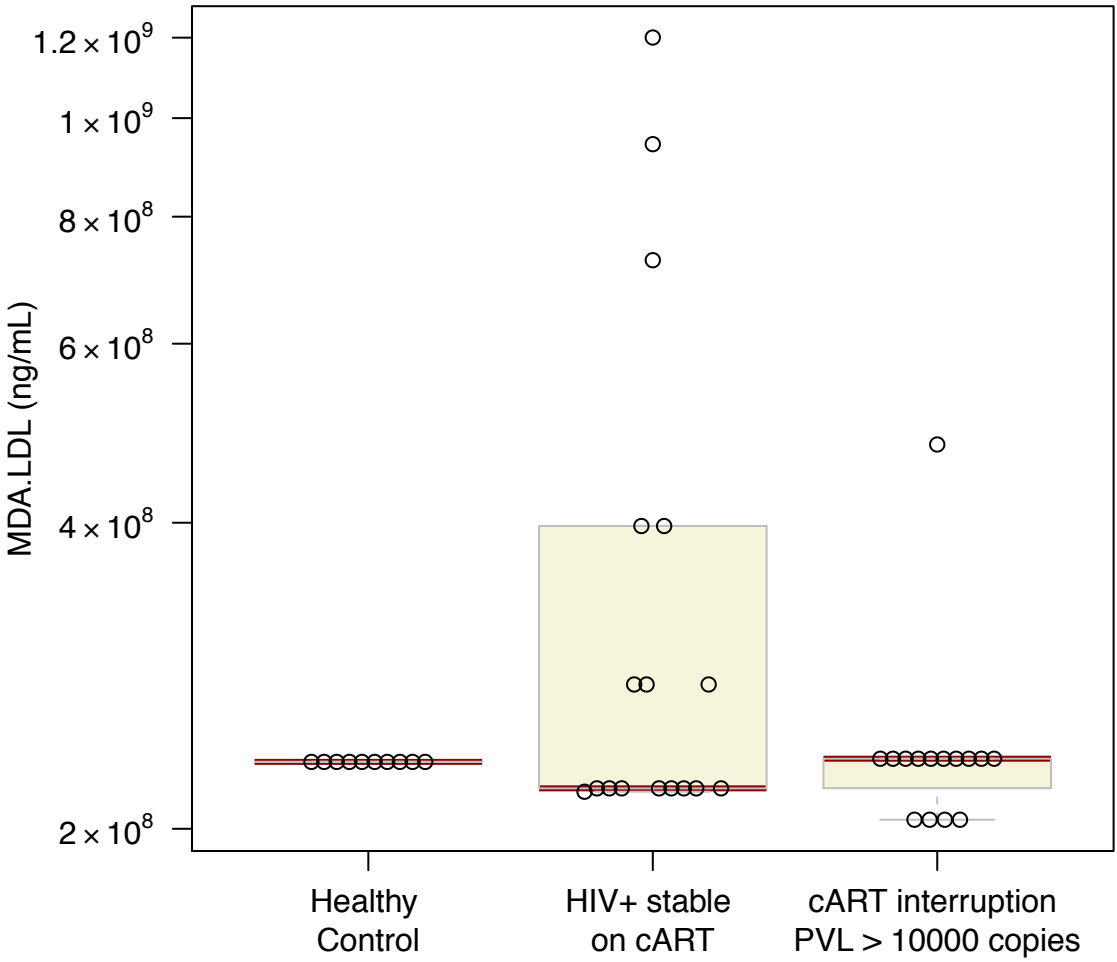

LLOQ: 324 ng/mL

# Matrix Metalloproteinase-1 (MMP-1)

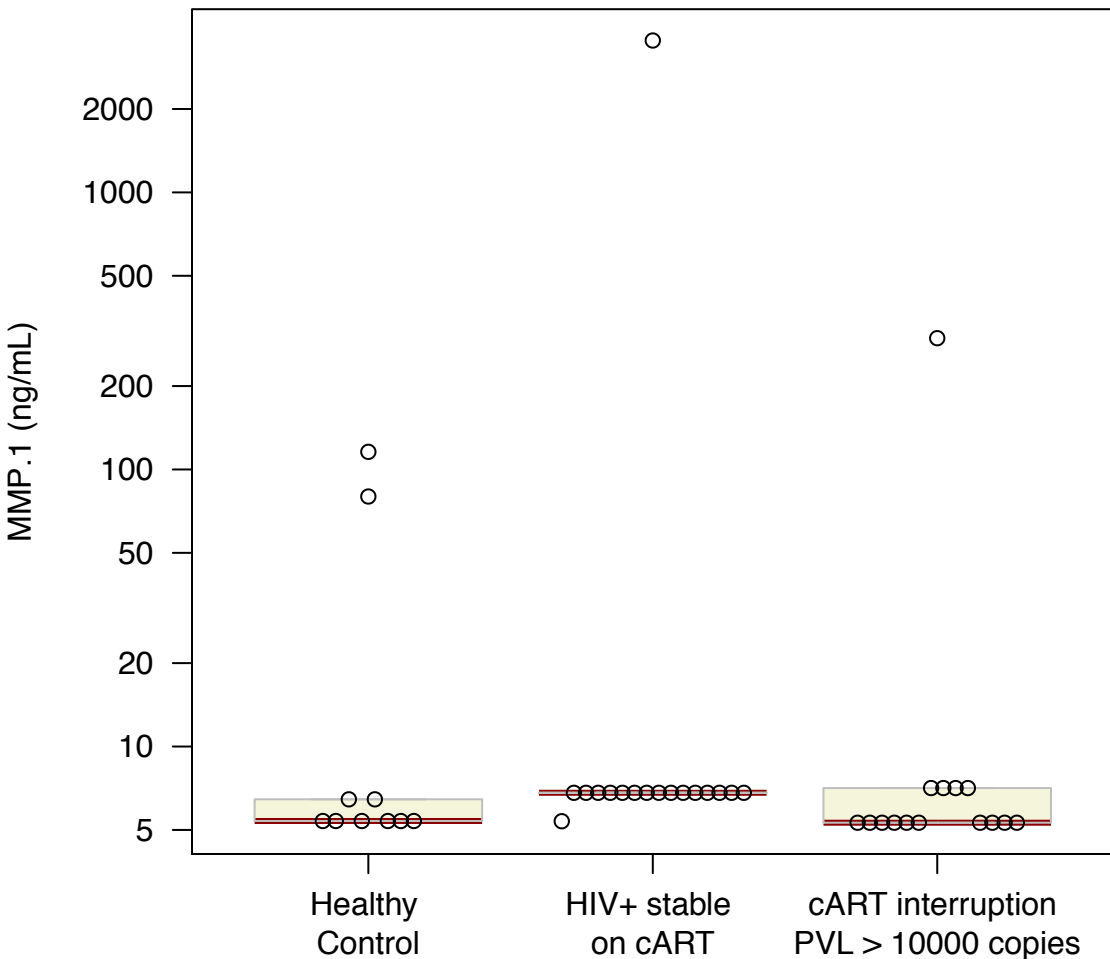

LLOQ: 1.7 ng/mL

# Matrix Metalloproteinase-3 (MMP-3)

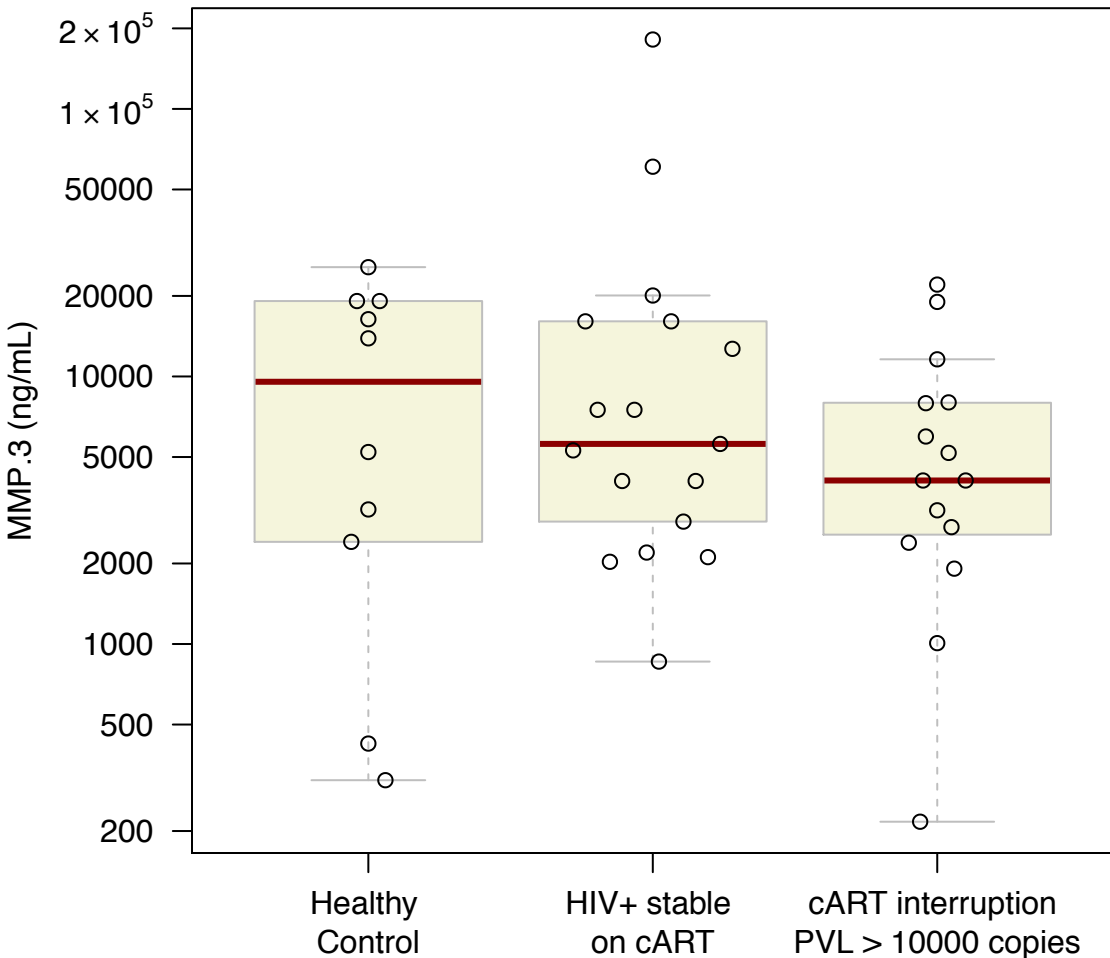

LLOQ: 0.026 ng/mL



# Matrix Metalloproteinase-7 (MMP-7)

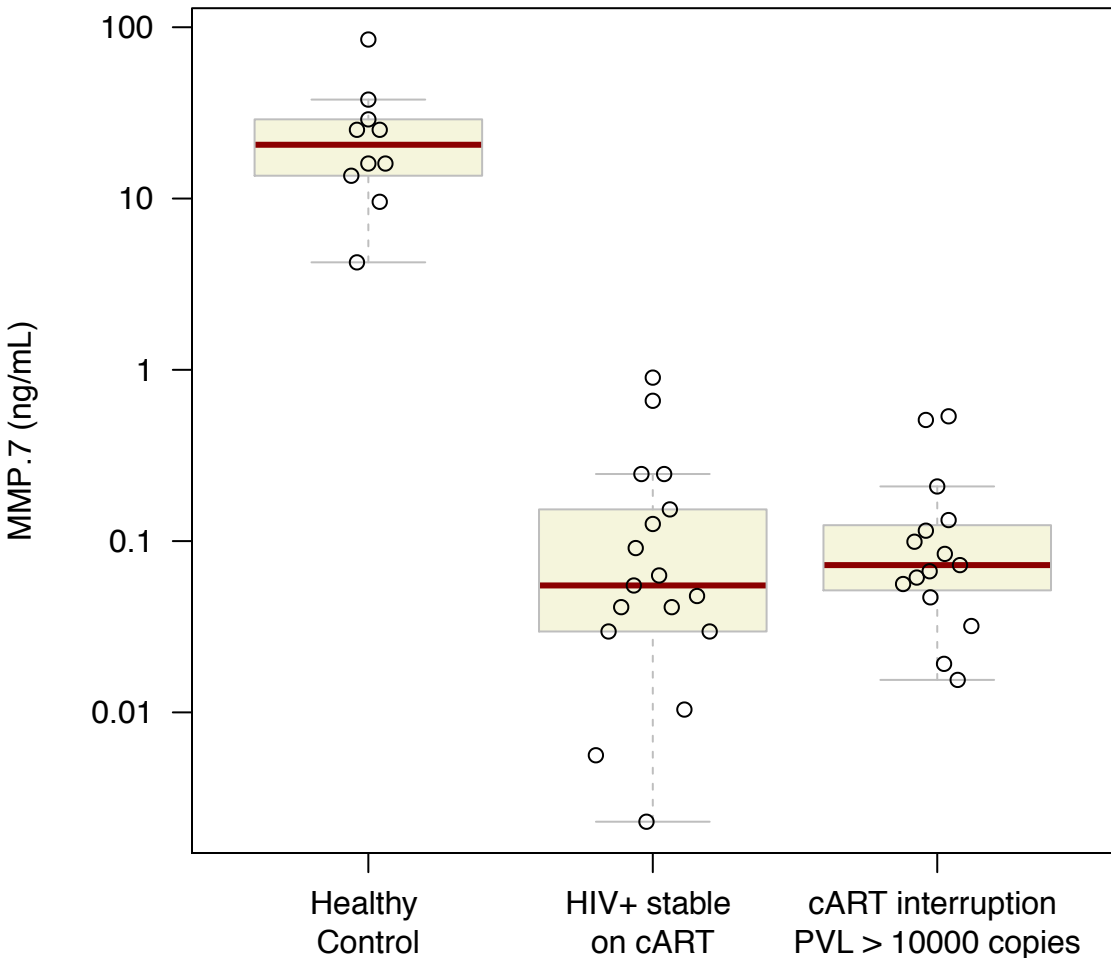

LLOQ: 0.1 ng/mL

# Matrix Metalloproteinase-9 (MMP-9)

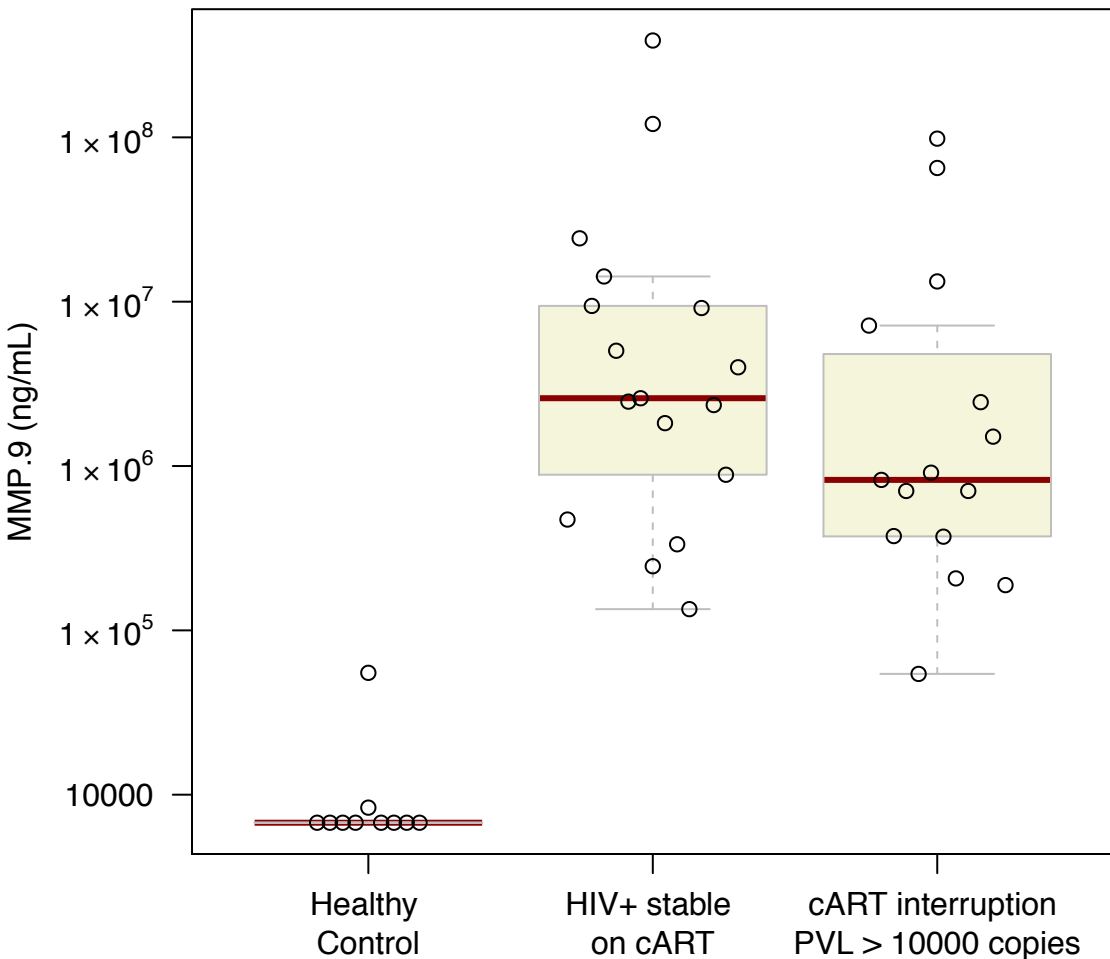

# Matrix Metalloproteinase-9, total (MMP-9, total)

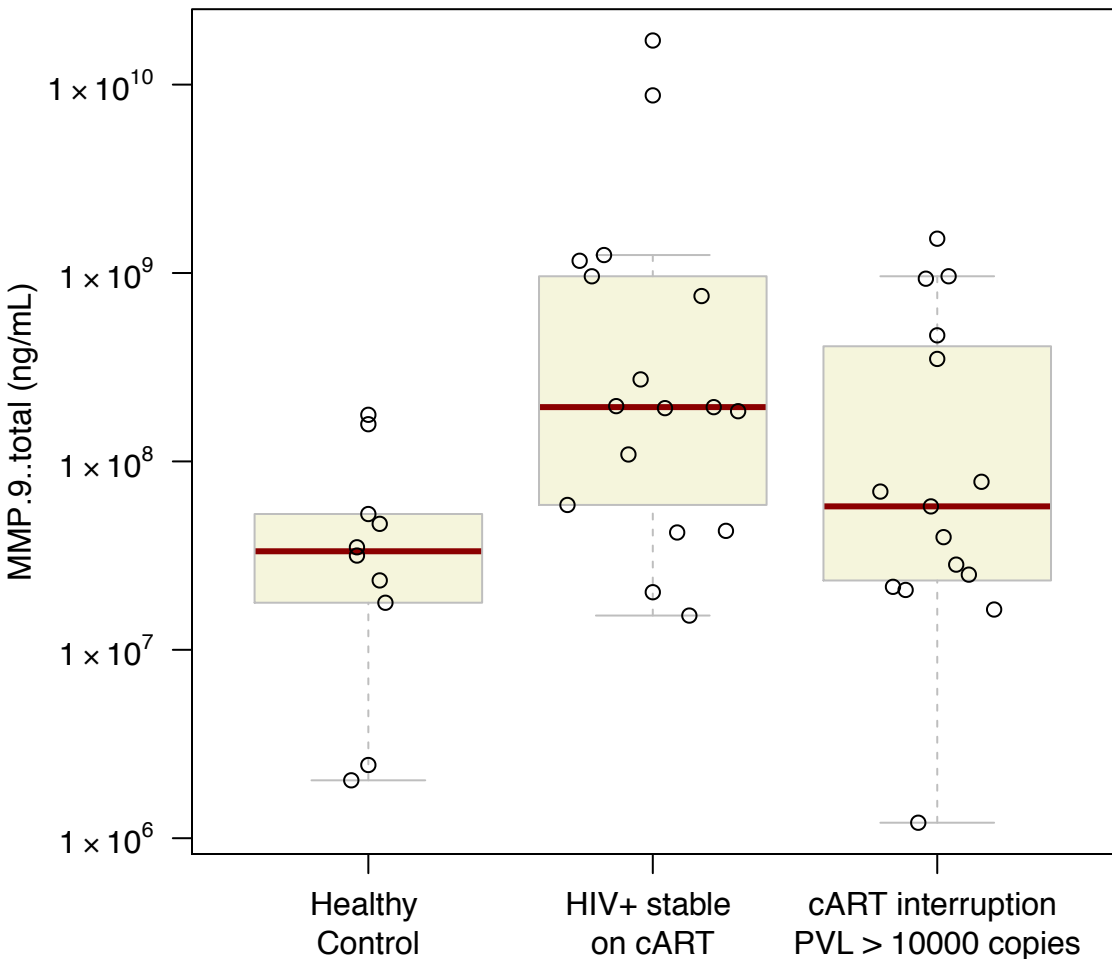

# Matrix Metalloproteinase-10 (MMP-10)

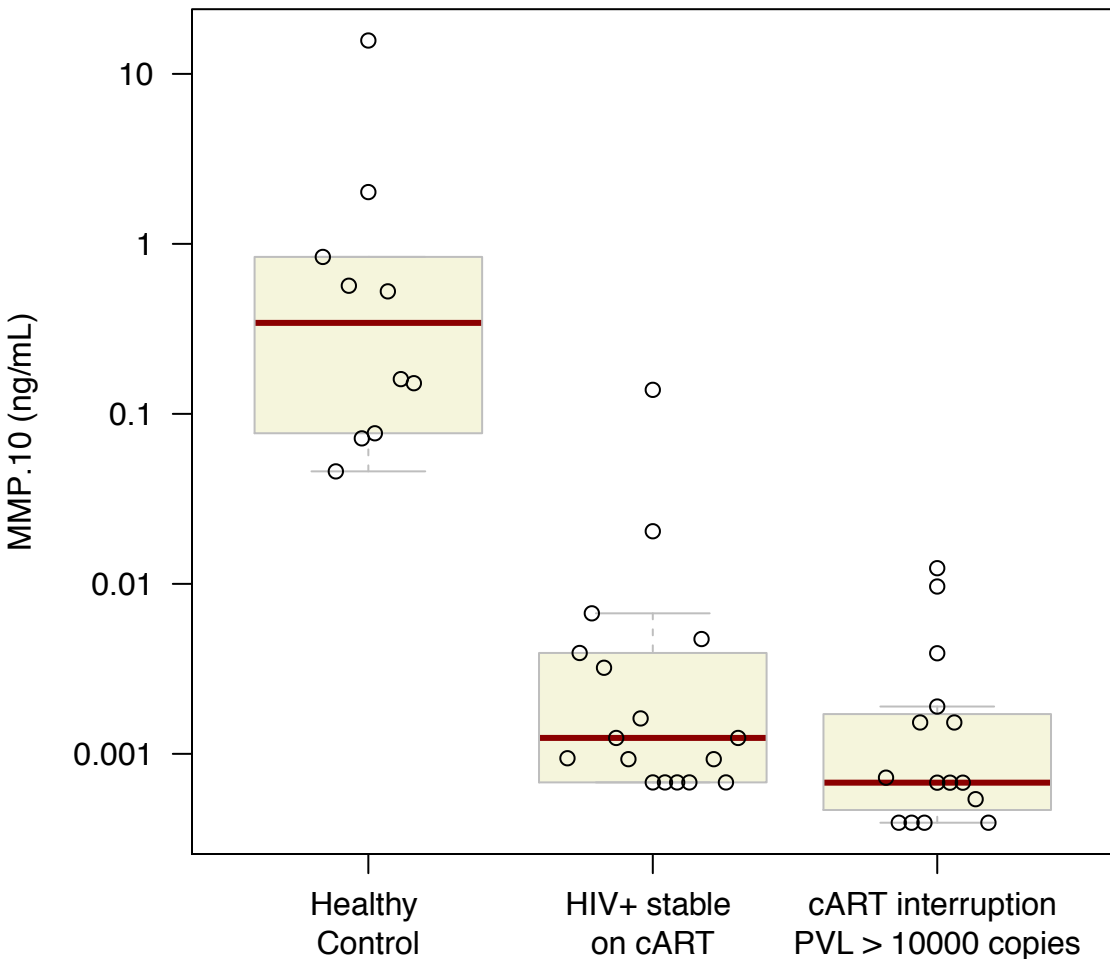

# Mesothelin (MSLN)

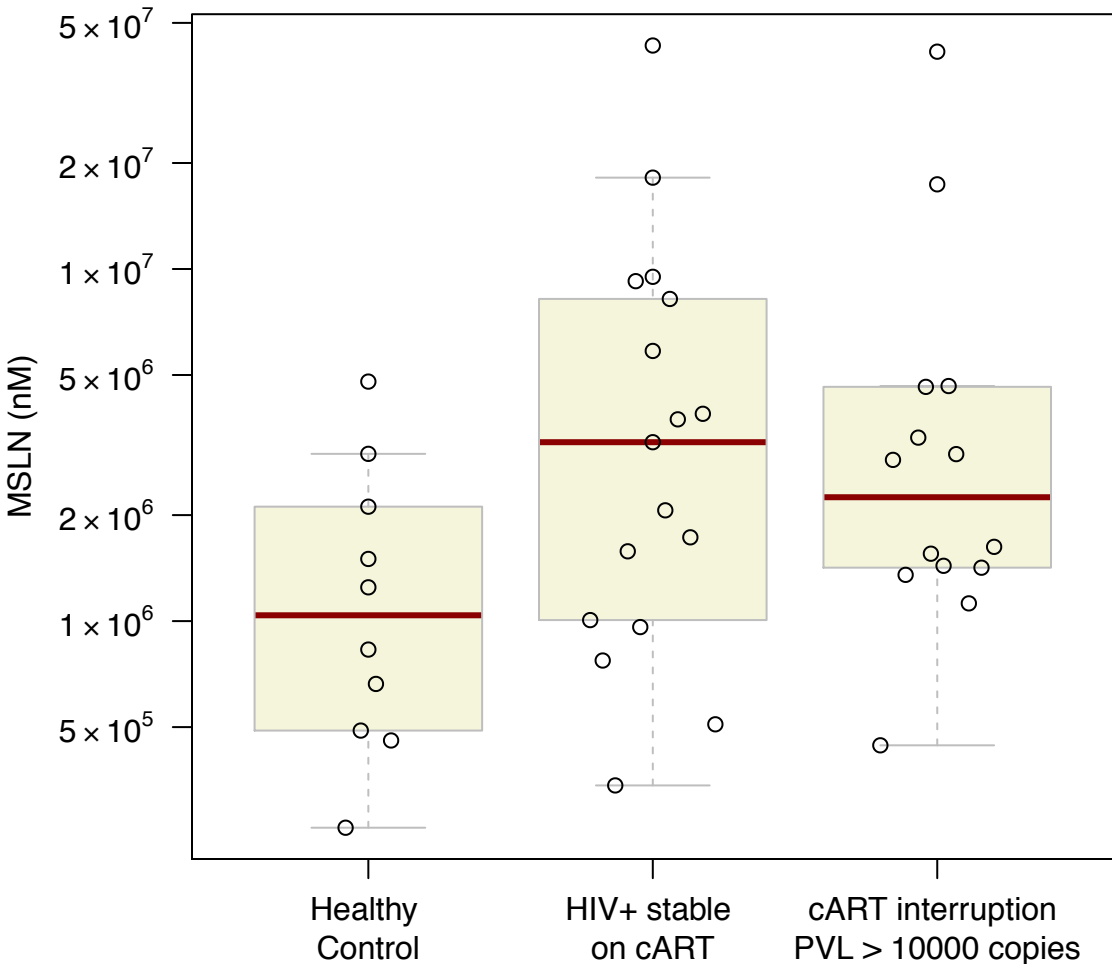

# MHC class I chain-related protein A (MICA)

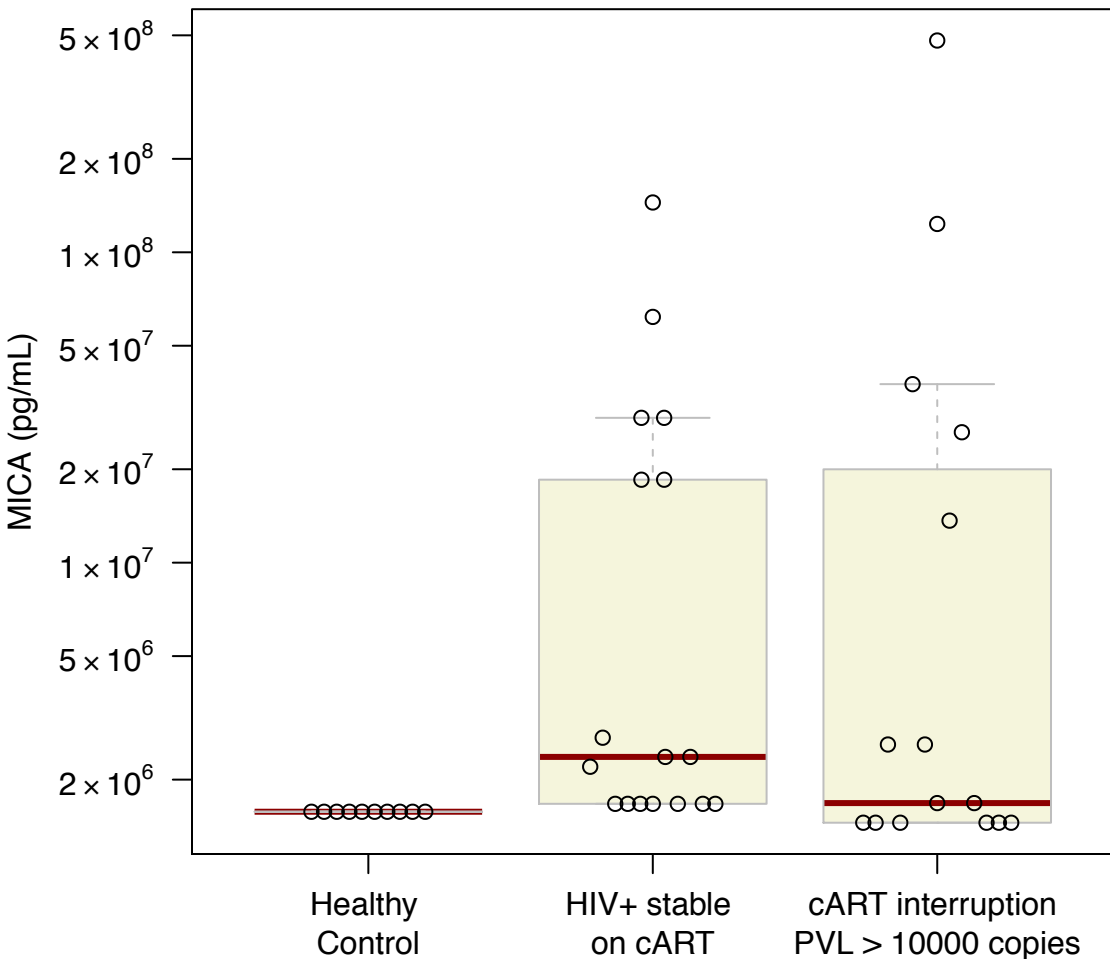

LLOQ: 73 pg/mL

# Monocyte Chemotactic Protein 1 (MCP-1)

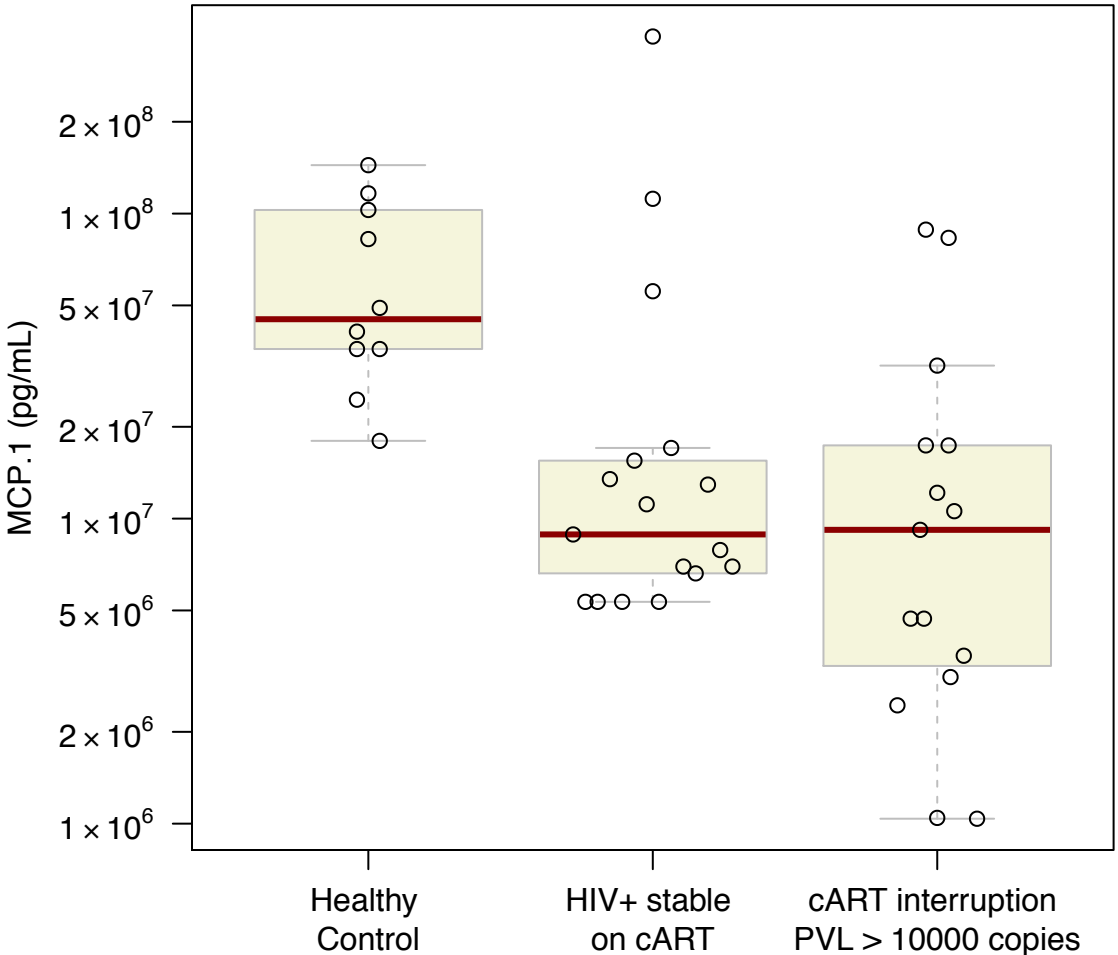

LLOQ: 45 pg/mL

# Monocyte Chemoattractant Protein 2 (MCP-2)

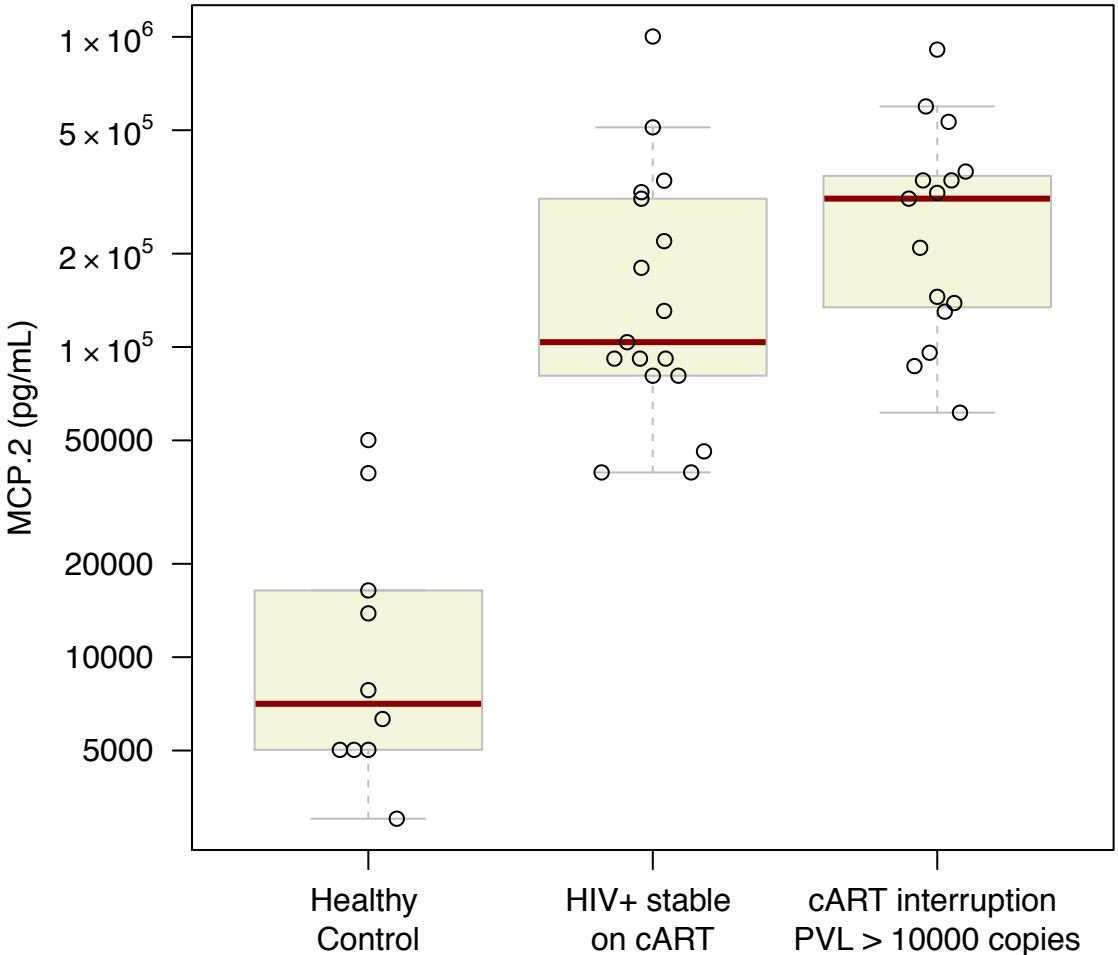

LLOQ: 6.7 pg/mL



# Monocyte Chemoattractant Protein 4 (MCP-4)

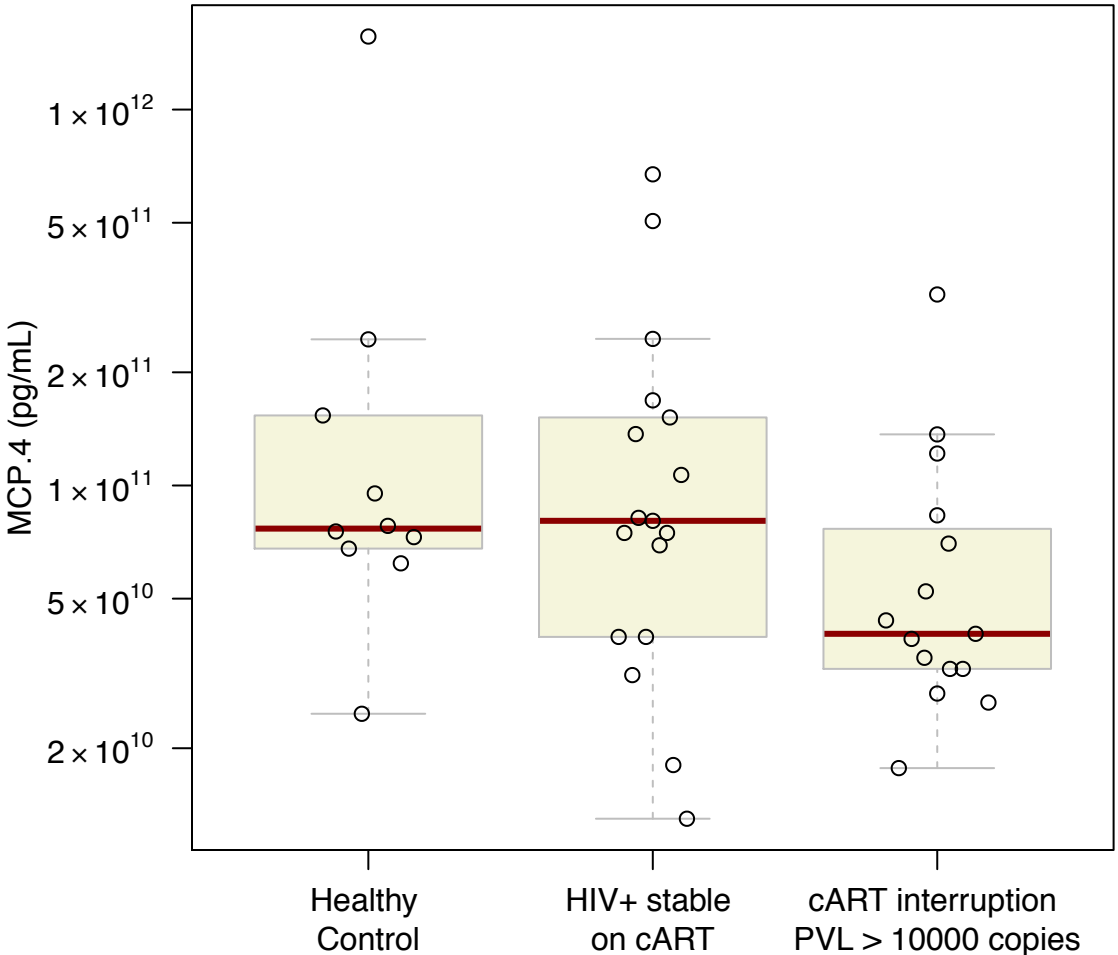

LLOQ: 445 pg/mL

# Monokine Induced by Gamma Interferon (MIG)

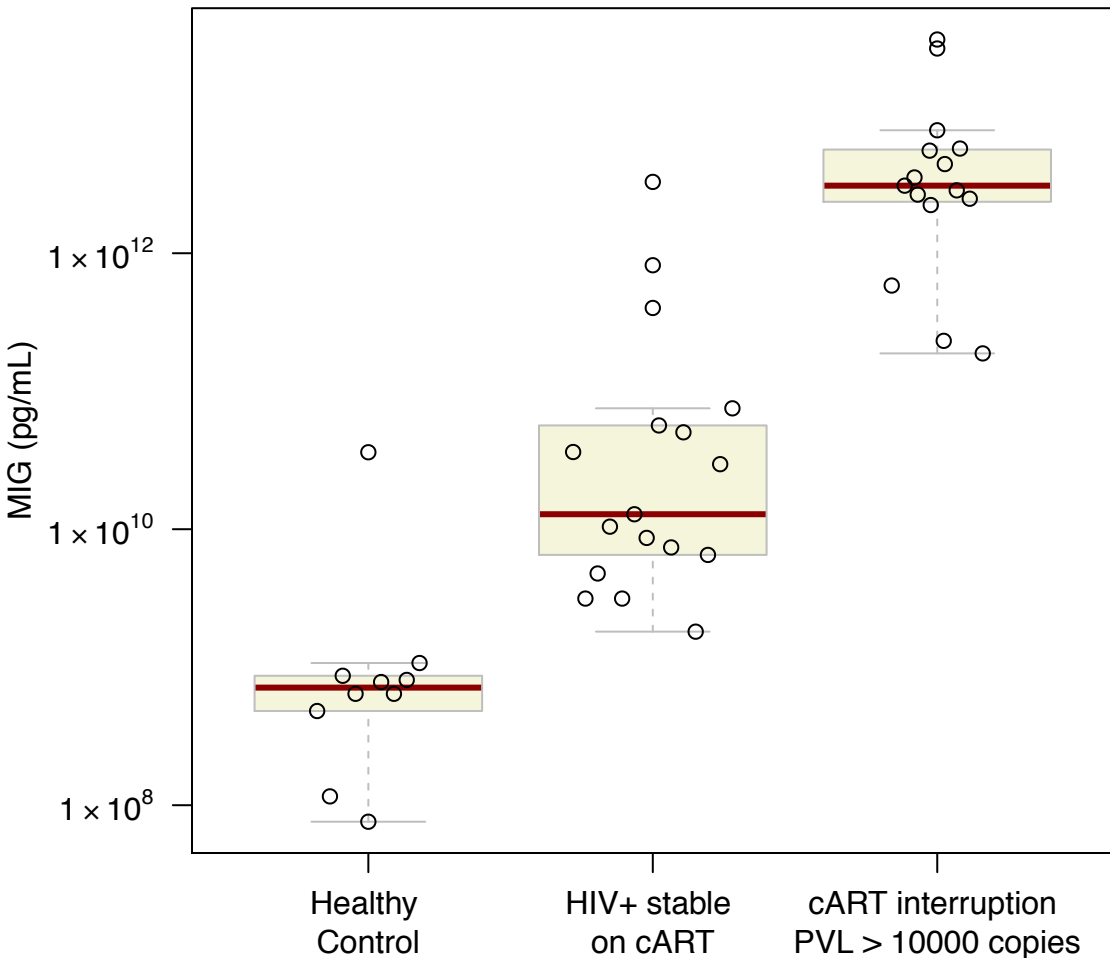

LLOQ: 110 pg/mL

# Myeloid Progenitor Inhibitory Factor 1 (MPIF-1)

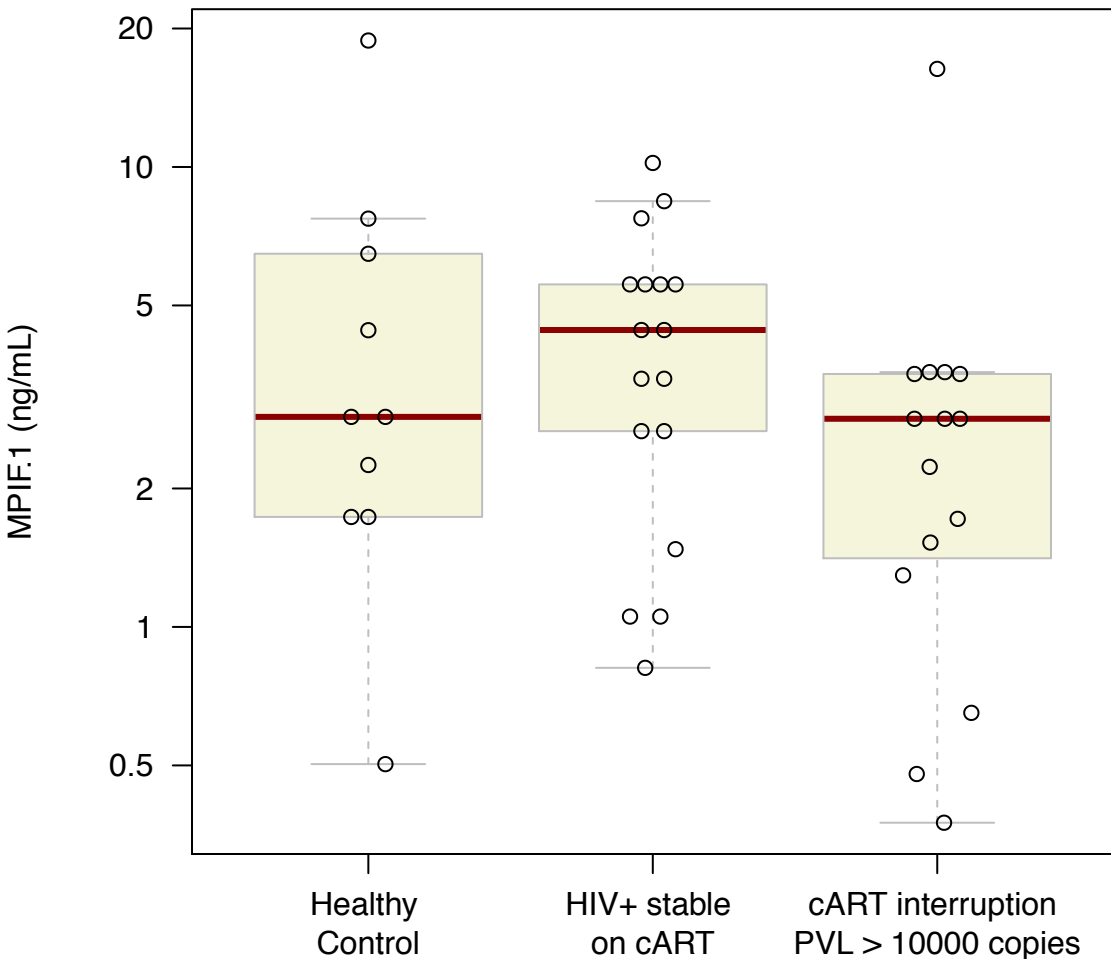

LLOQ: 0.14 ng/mL

# Myeloperoxidase (MPO)

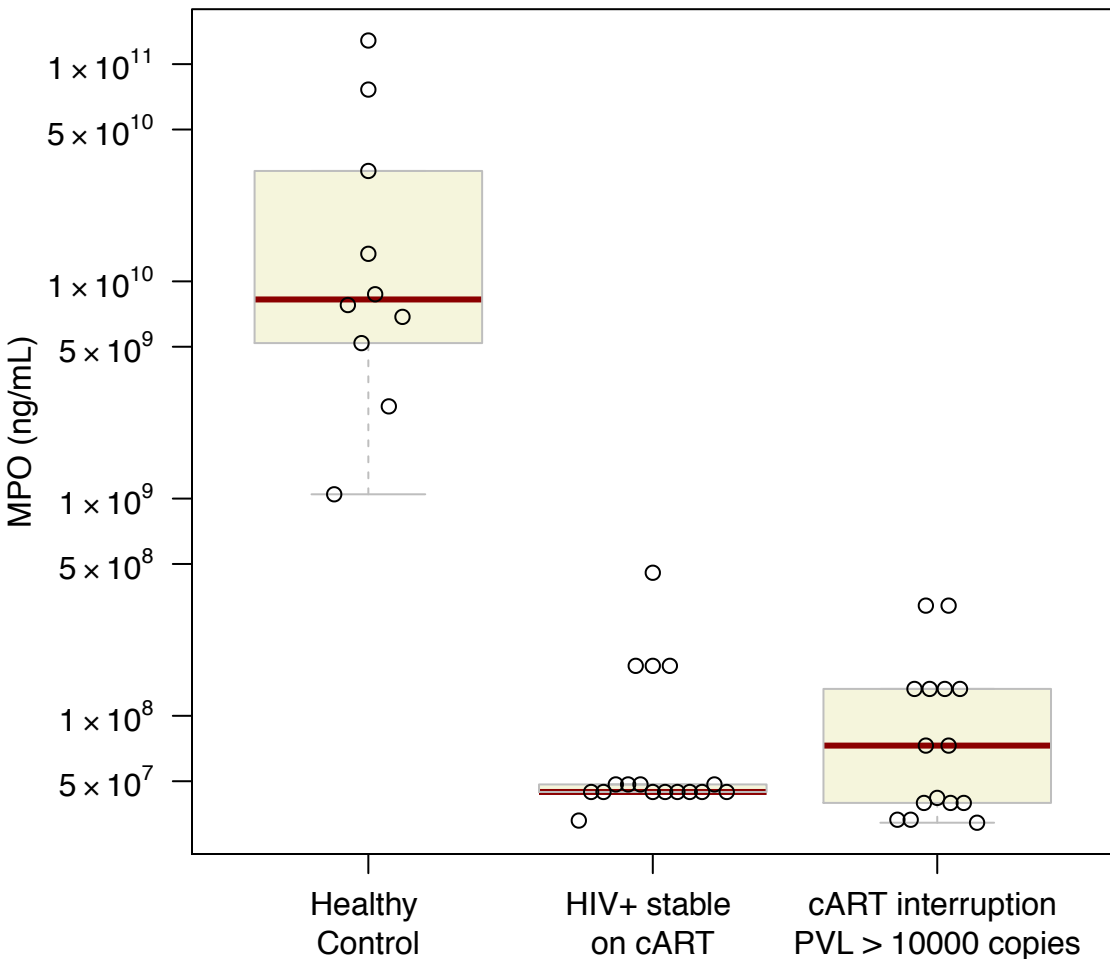

LLOQ: 186 ng/mL

# Myoglobin

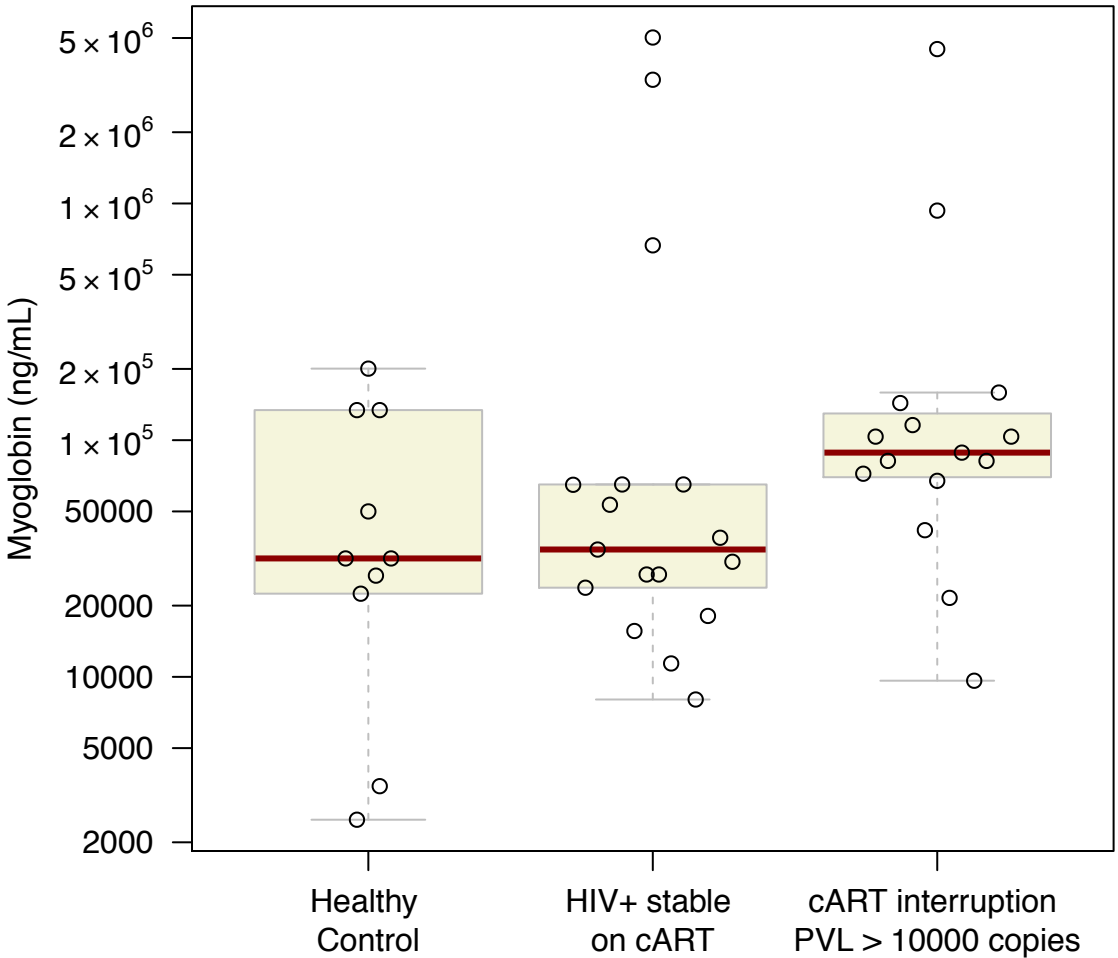

LLOQ: 2.1 ng/mL

# -terminal prohormone of brain natriuretic peptide (NT

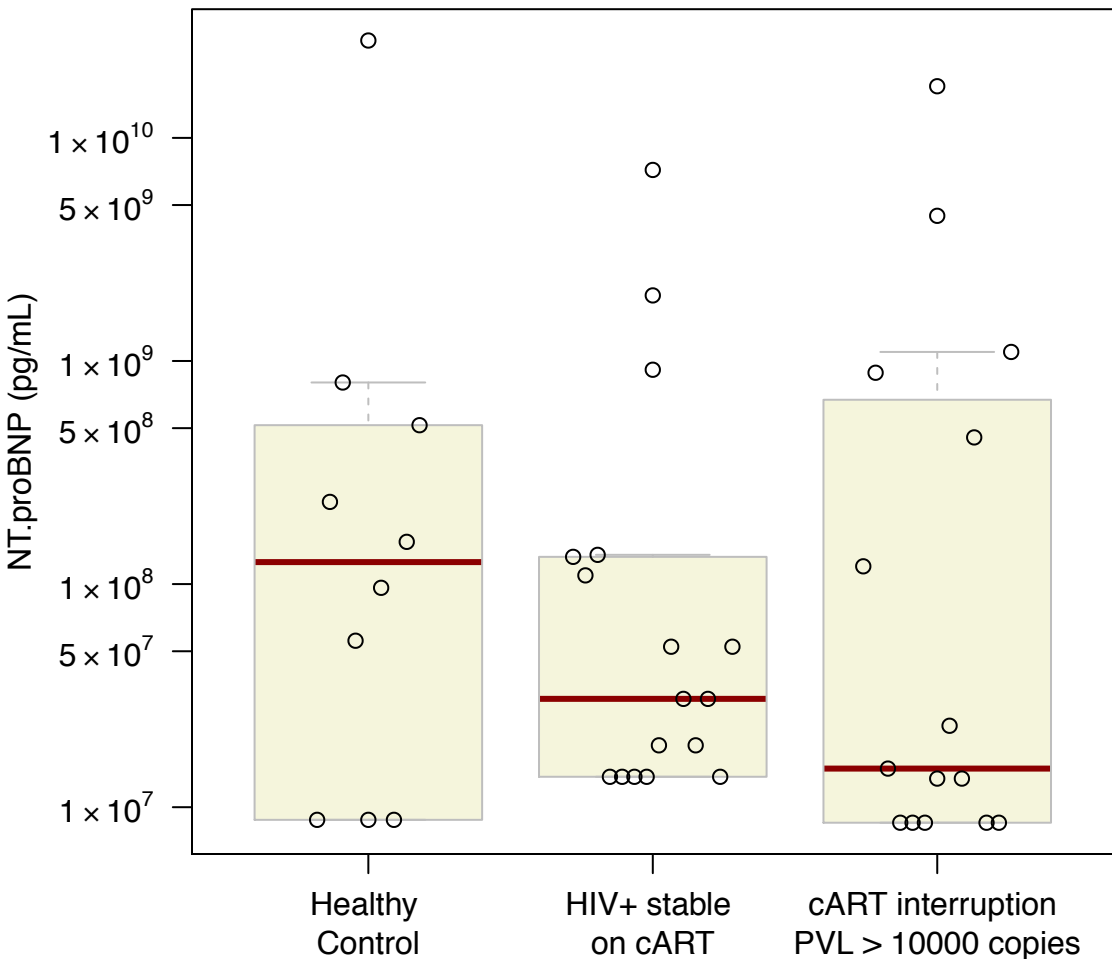



# Neuron-Specific Enolase (NSE)

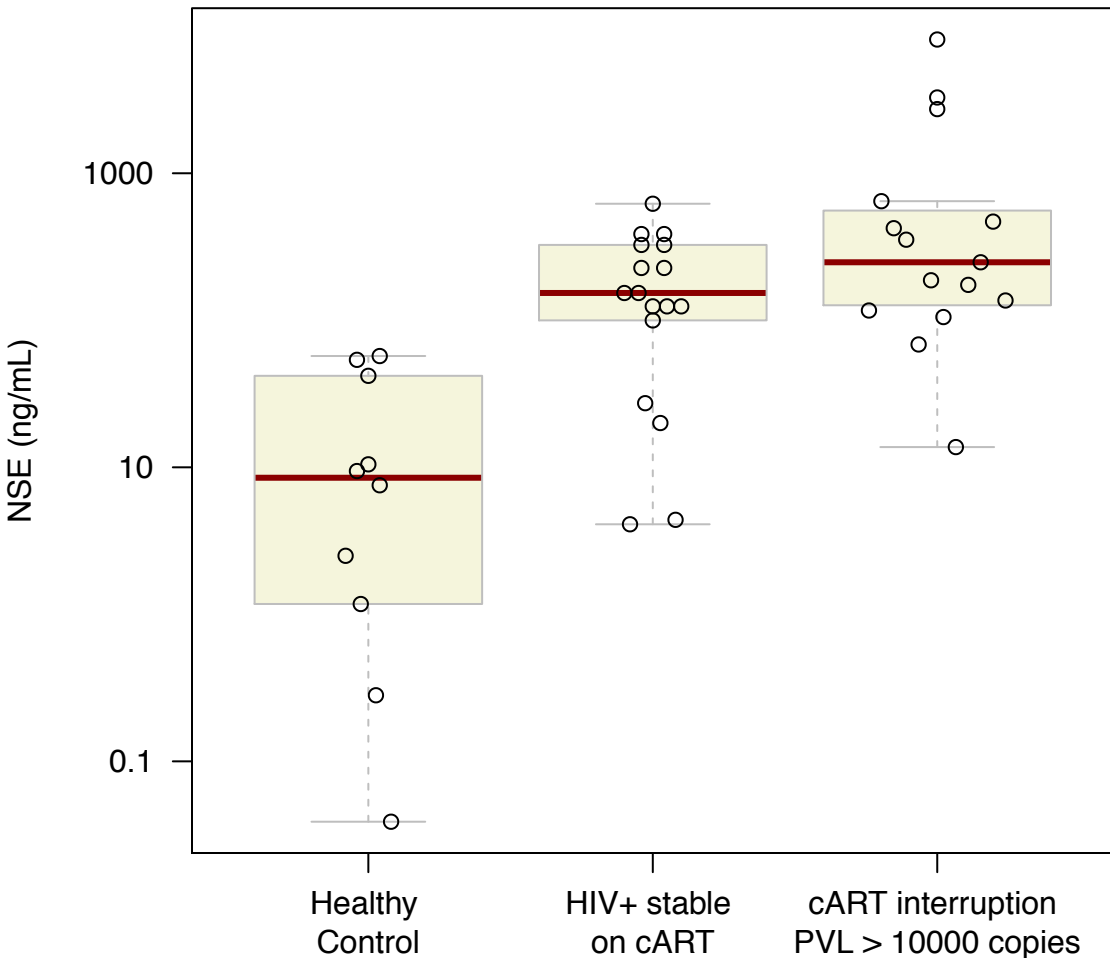

LLOQ: 0.18 ng/mL



# Neuronal Cell Adhesion Molecule (Nr-CAM)

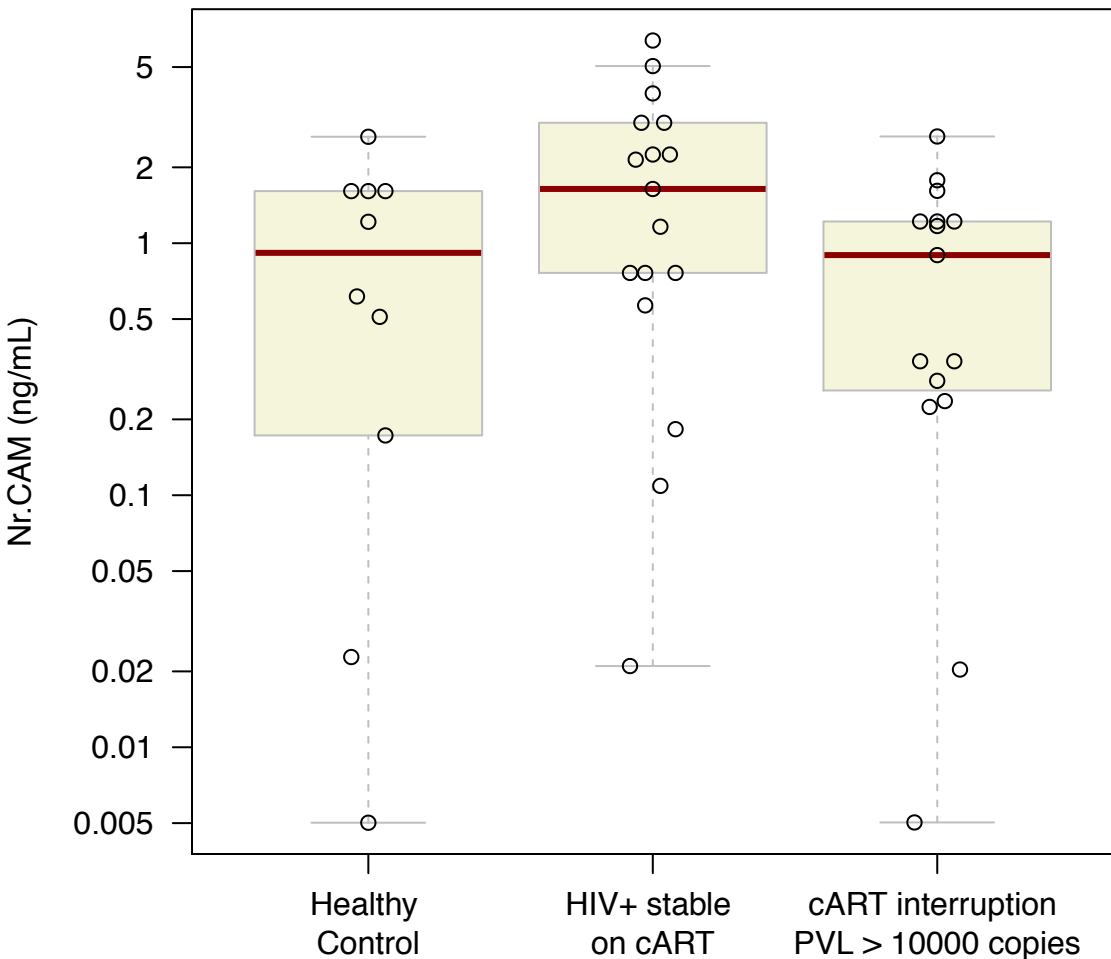

LLOQ: 0.2 ng/mL

# Neuropilin-1

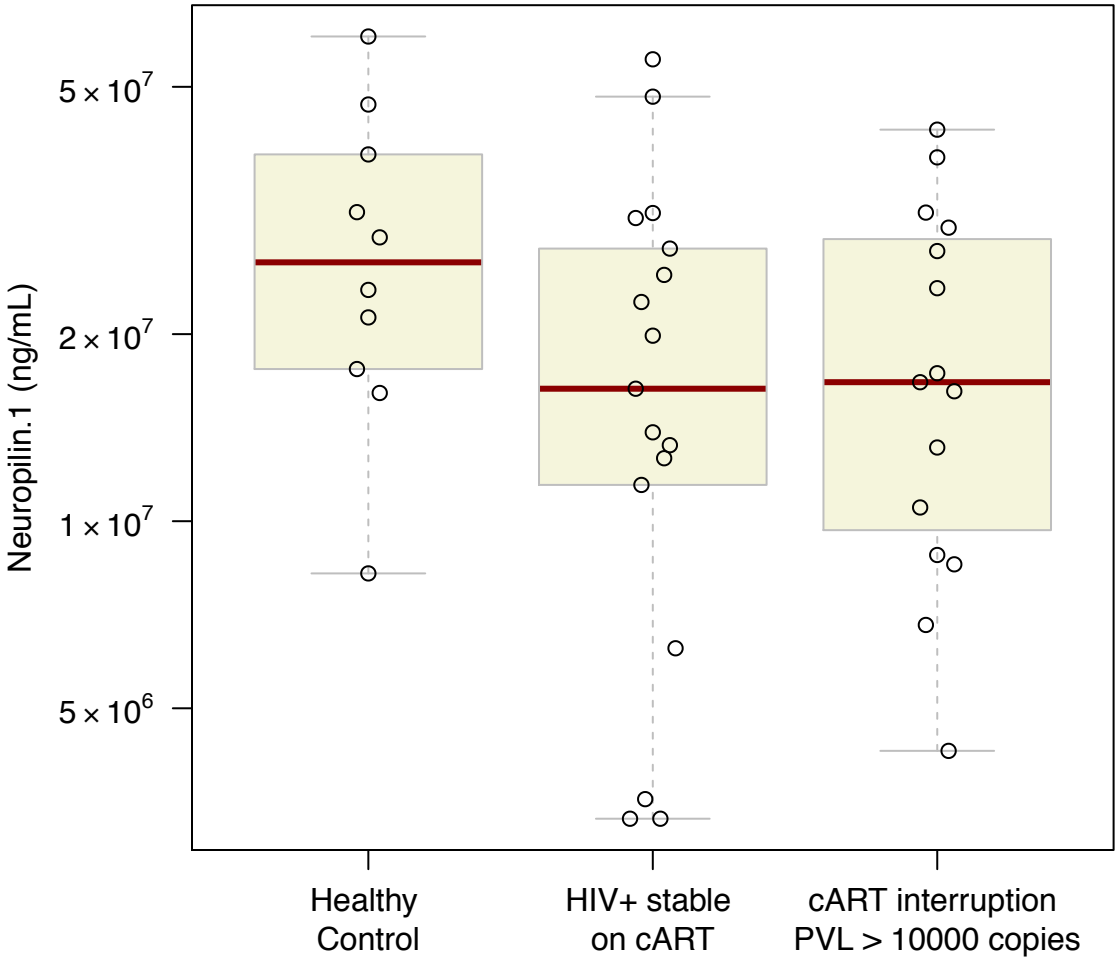

LLOQ: 3.4 ng/mL

# Neutrophil Gelatinase–Associated Lipocalin (NGAL)

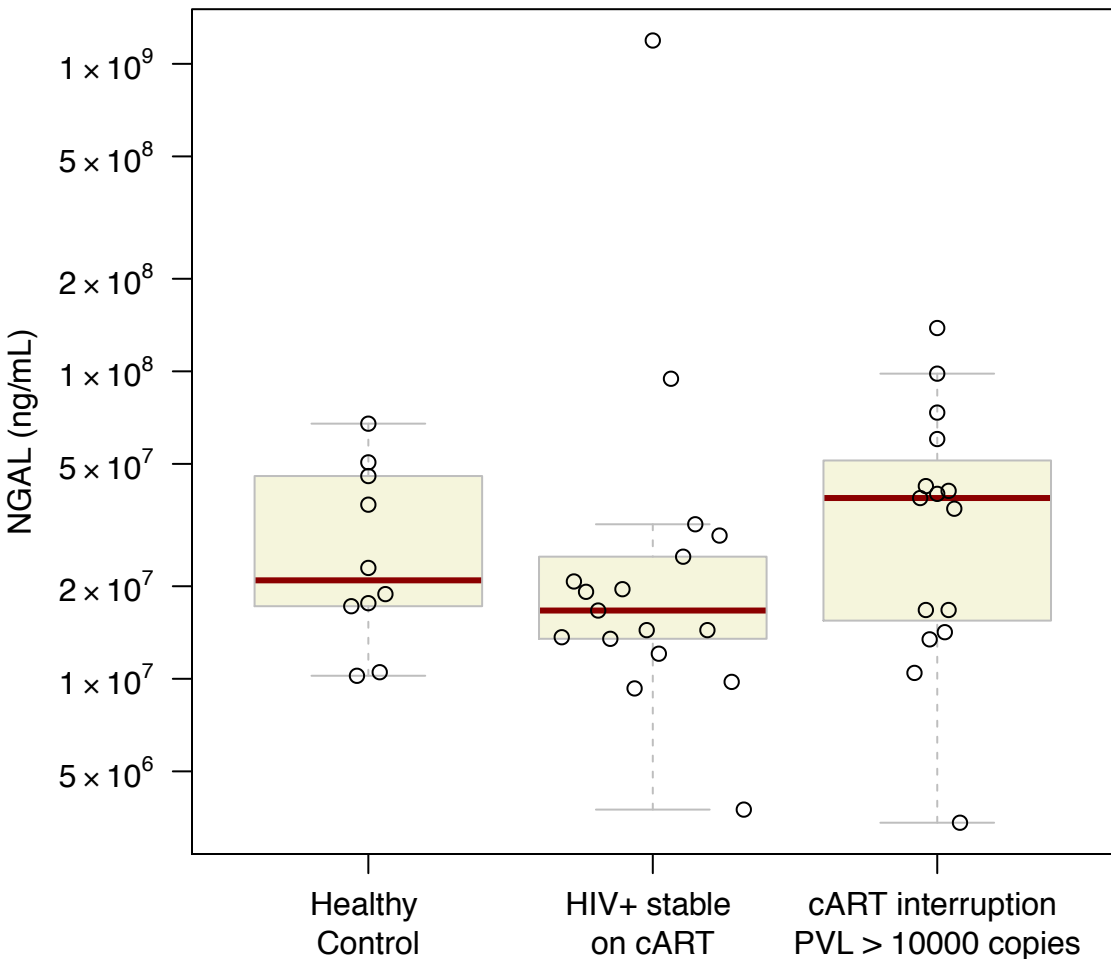

LLOQ: 2.9 ng/mL

# Osteopontin

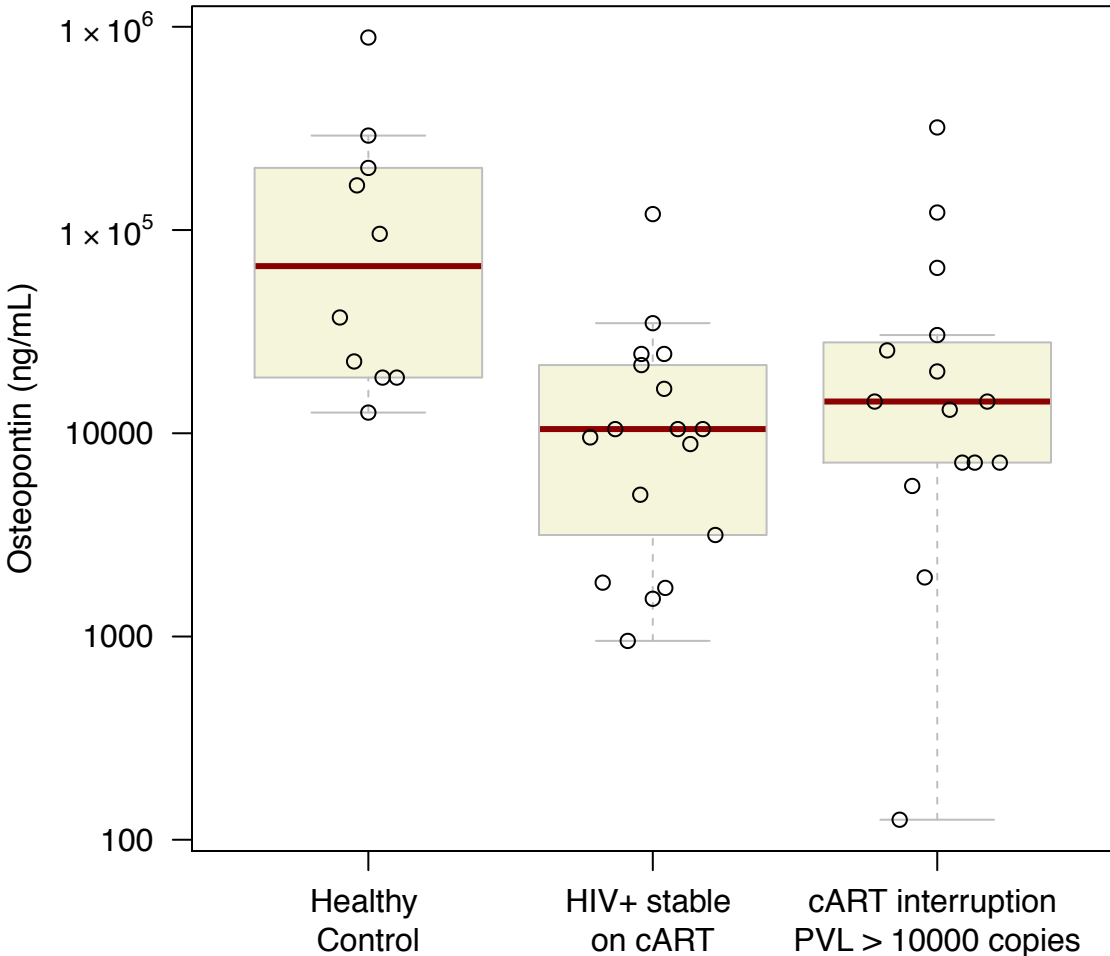

# Osteoprotegerin (OPG)

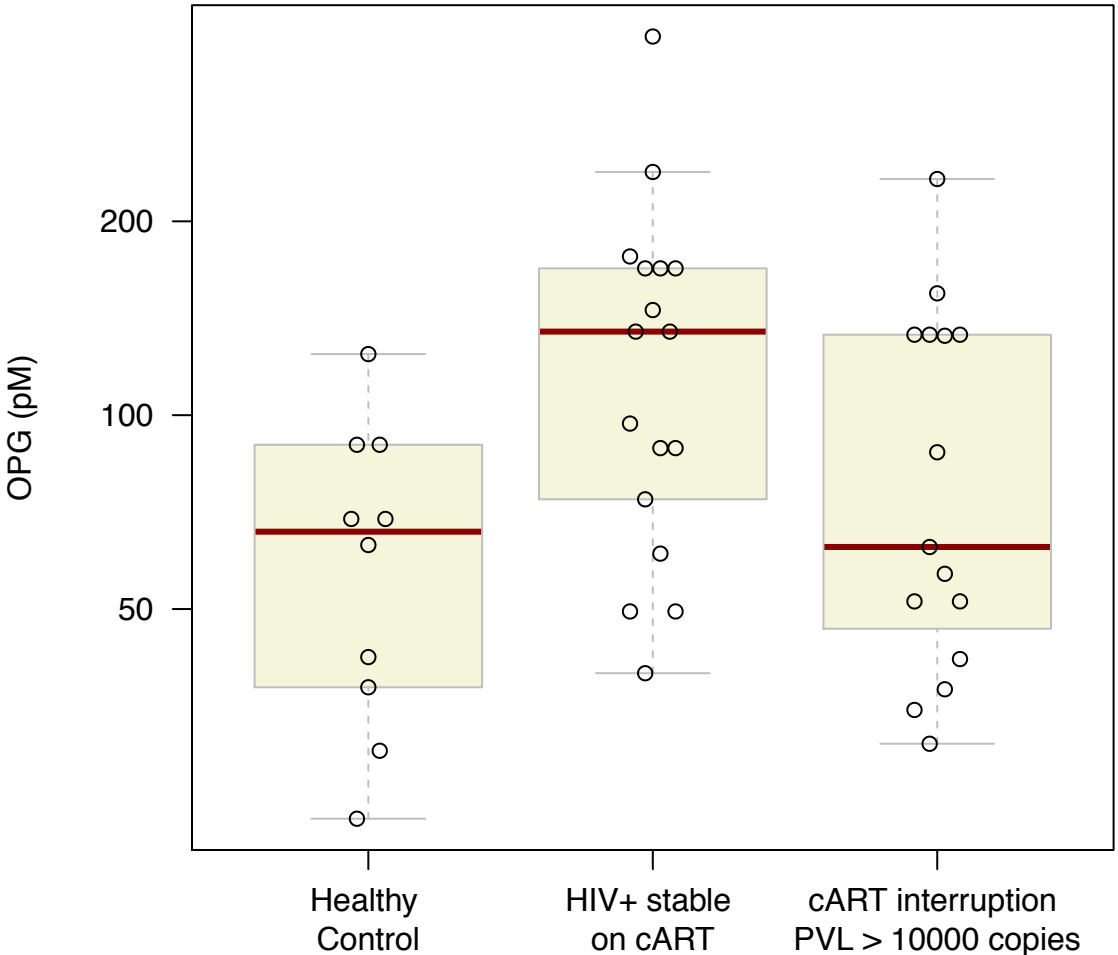

LLOQ: 0.45 pM

# Pancreatic Polypeptide (PPP)

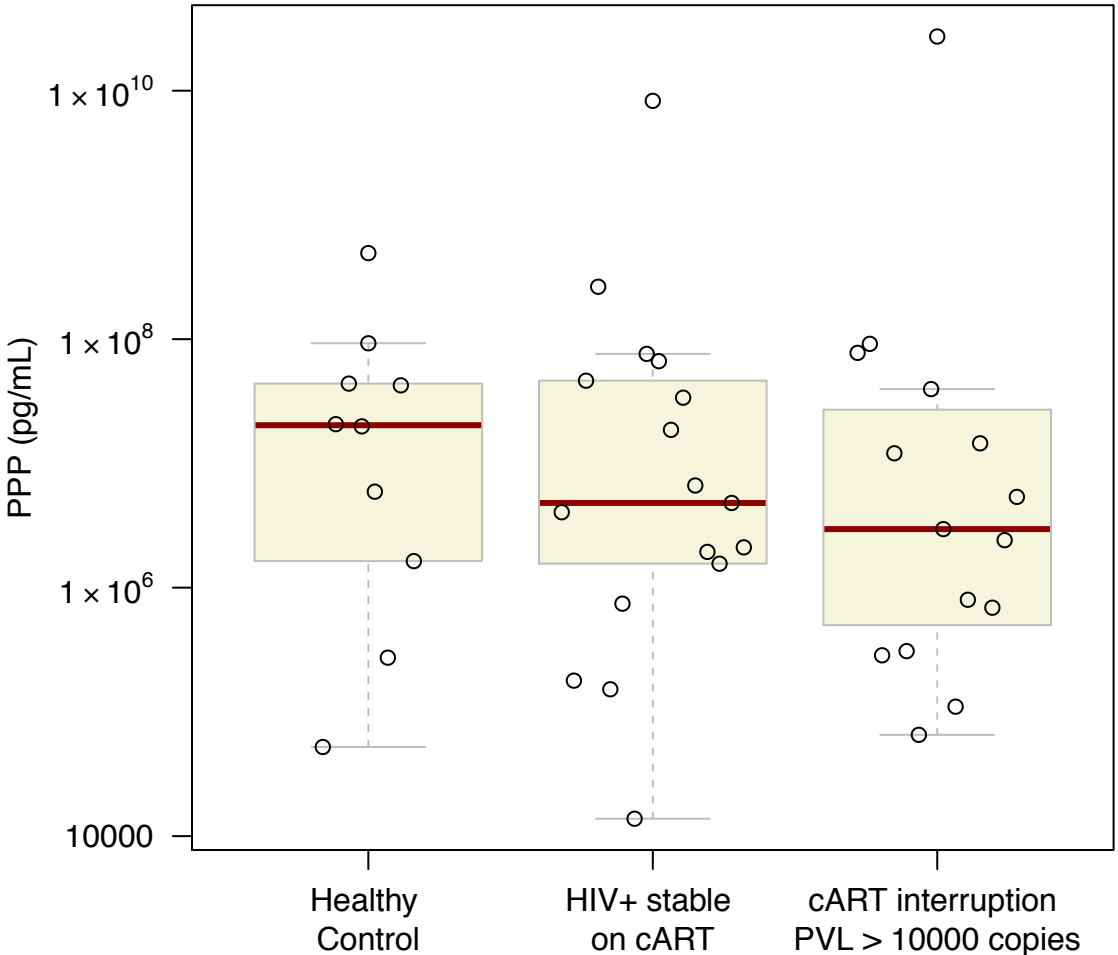

LLOQ: 1.6 pg/mL

# Pepsinogen I (PGI)

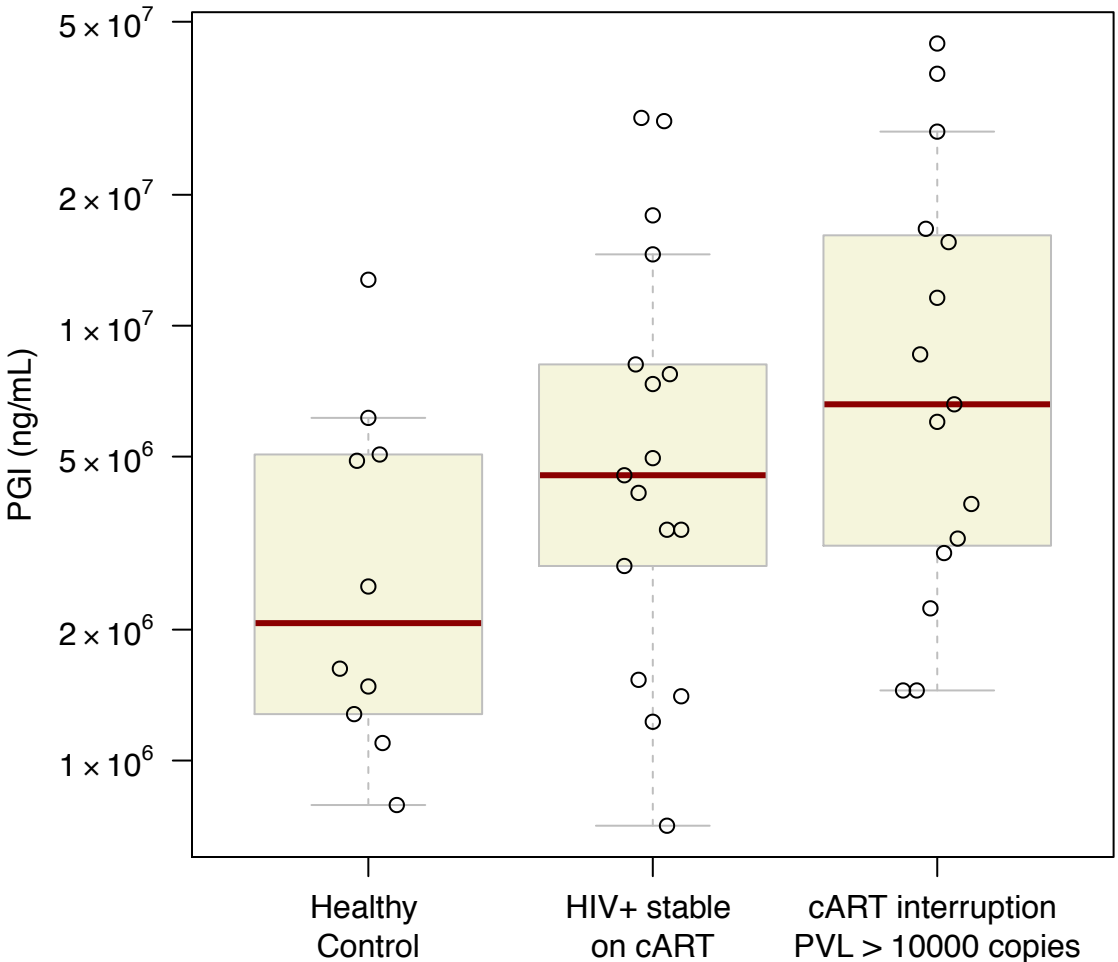

LLOQ: 15 ng/mL

# Peptide YY (PYY)

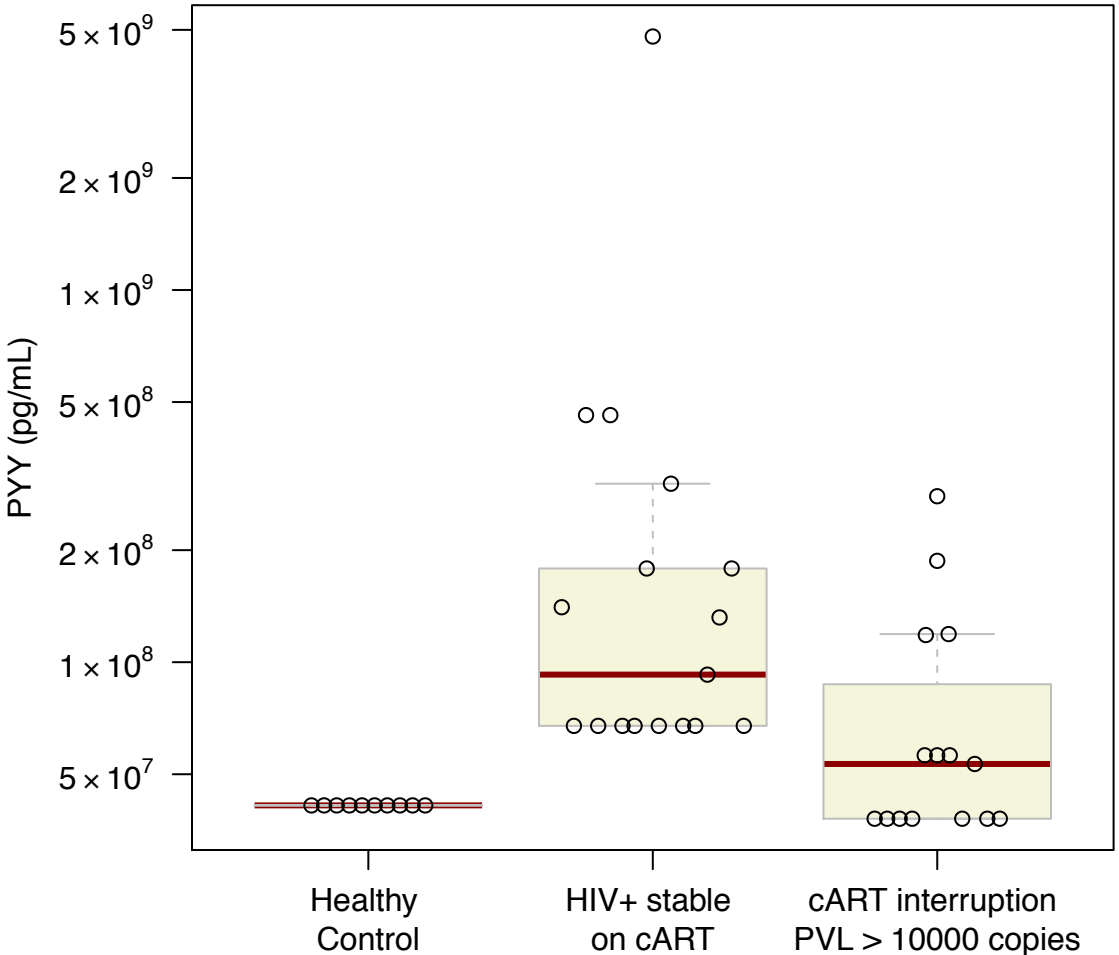

LLOQ: 202 pg/mL



# Phosphoserine Aminotransferase (PSAT)

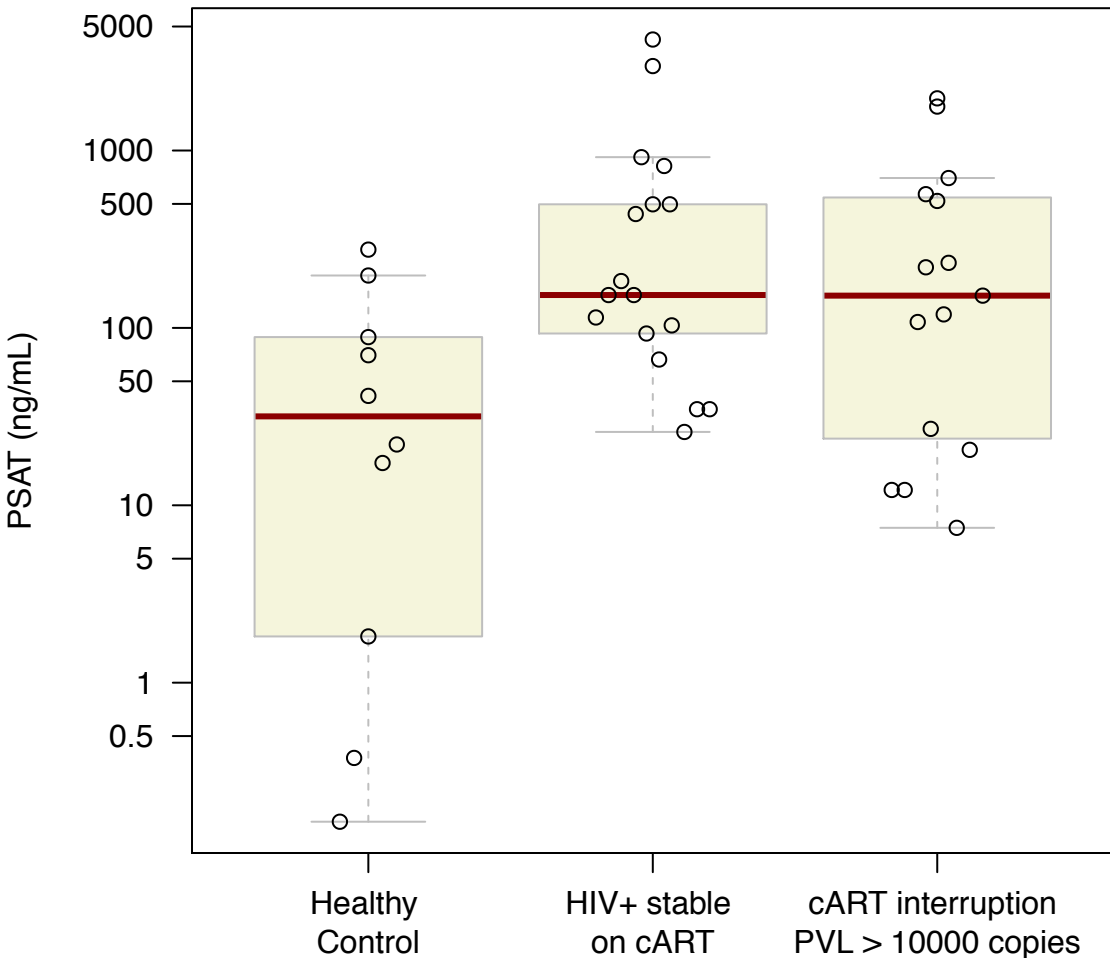

LLOQ: 0.62 ng/mL

# Plasminogen Activator Inhibitor 1 (PAI-1)

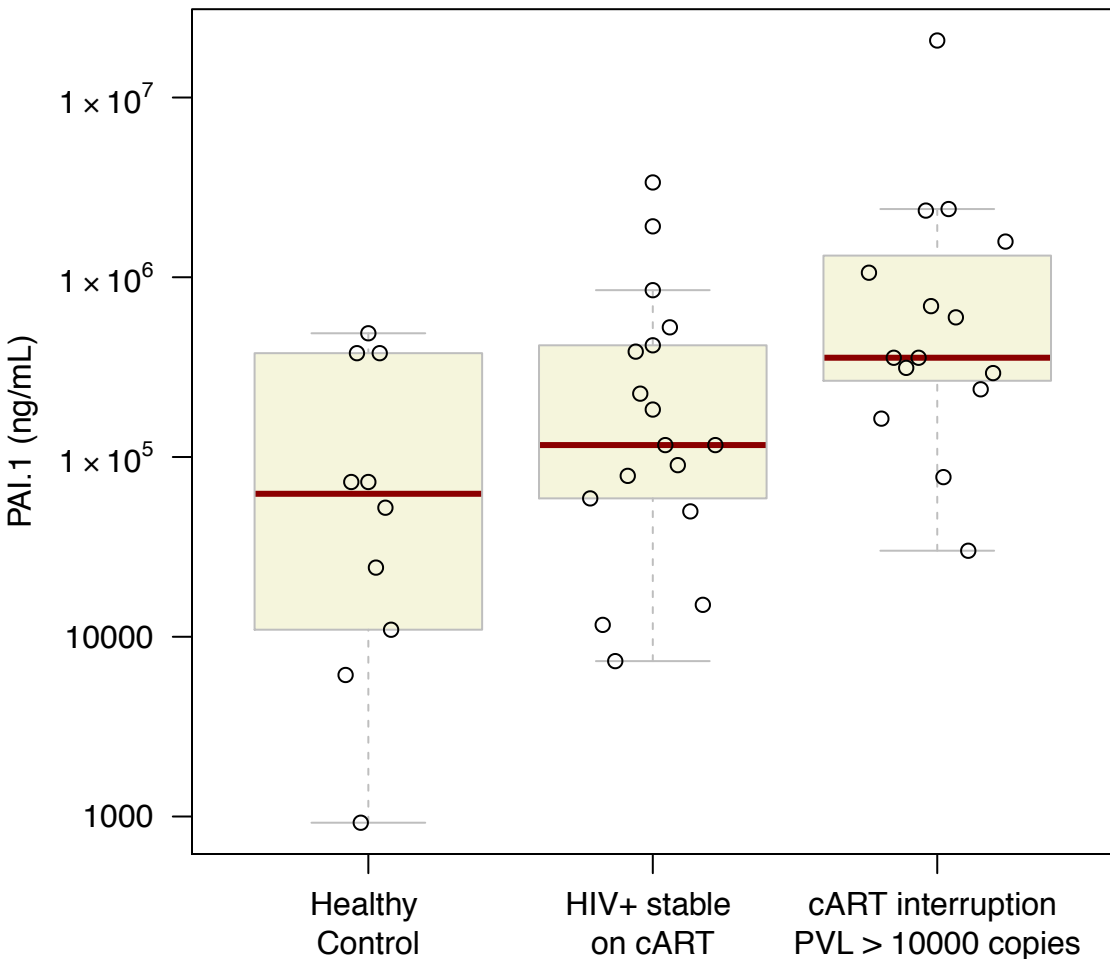

LLOQ: 2.8 ng/mL

# Platelet-Derived Growth Factor BB (PDGF-BB)

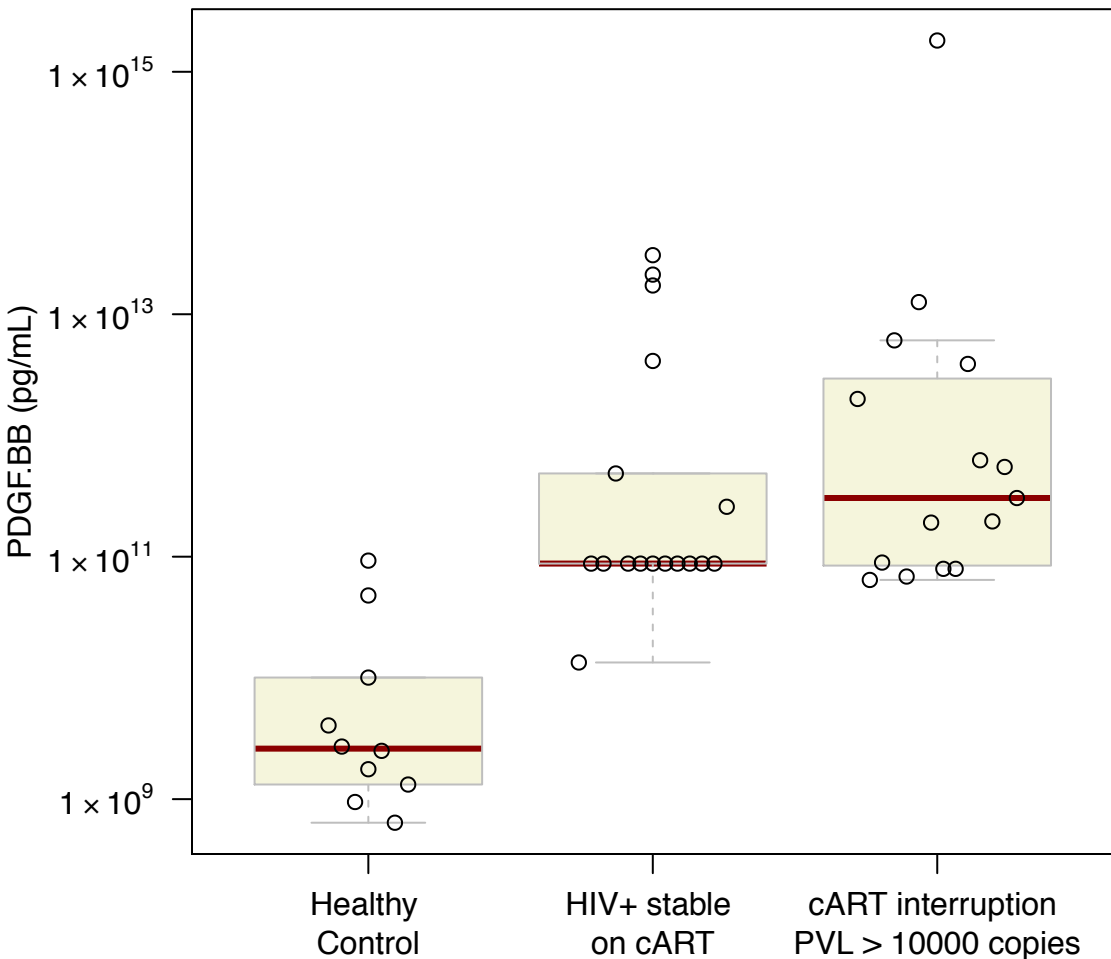

LLOQ: 719 pg/mL

# Progesterone

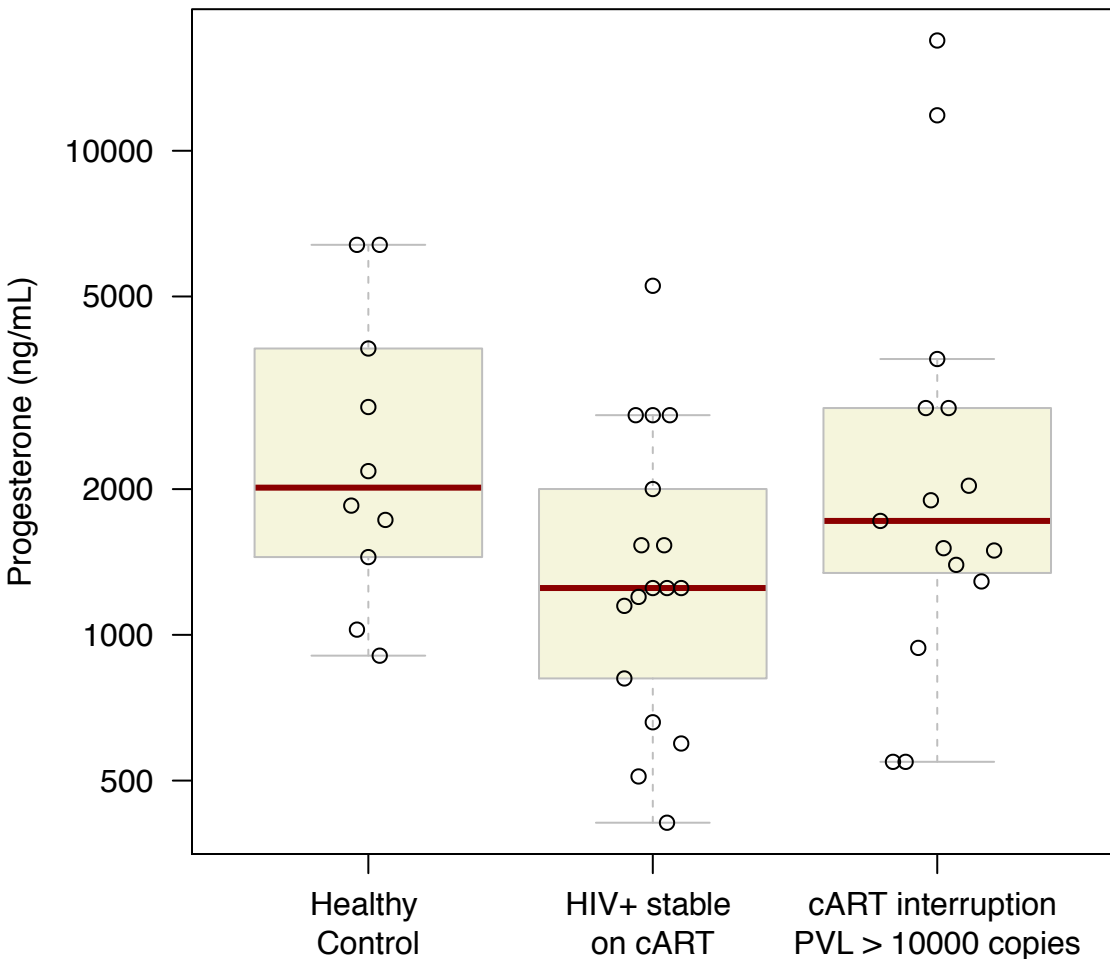

# Proinsulin, Intact

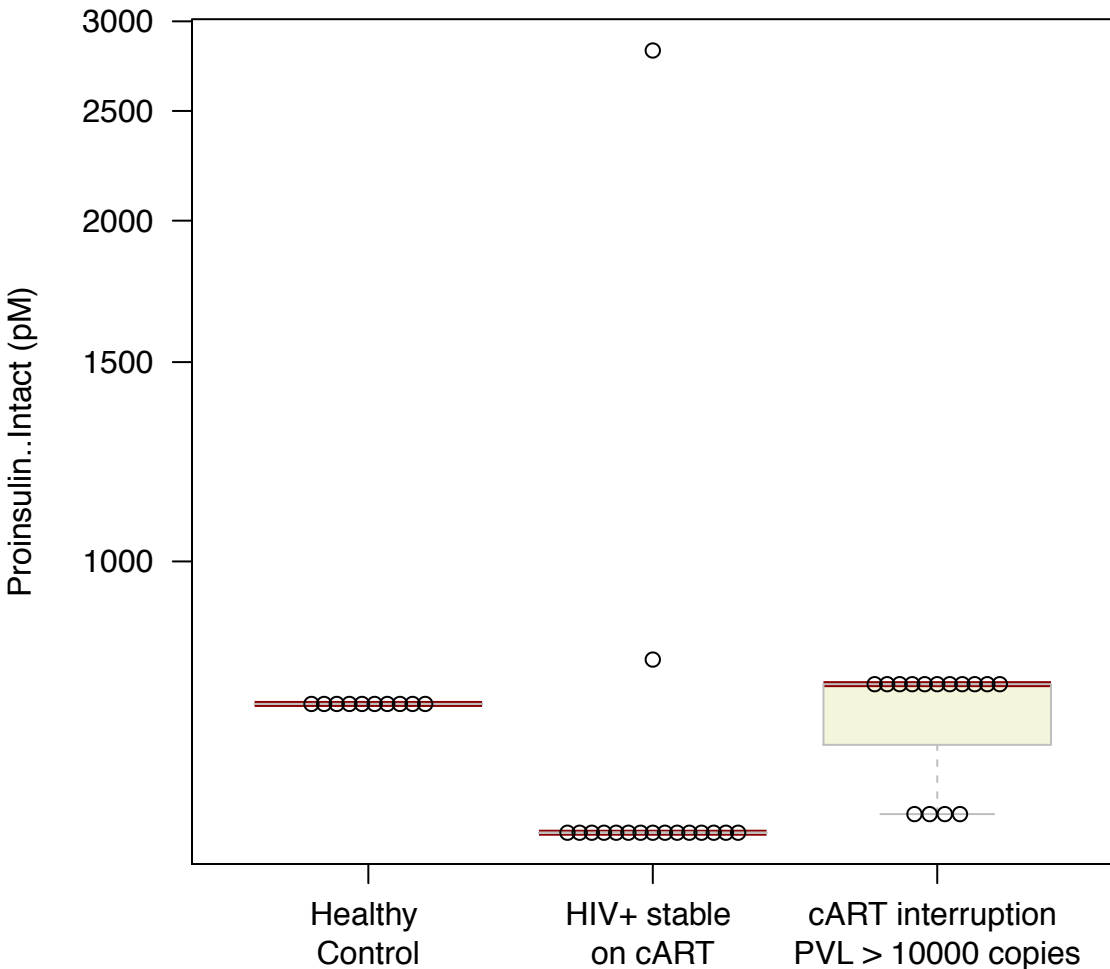

LLOQ: 7.1 pM

# Proinsulin, Total

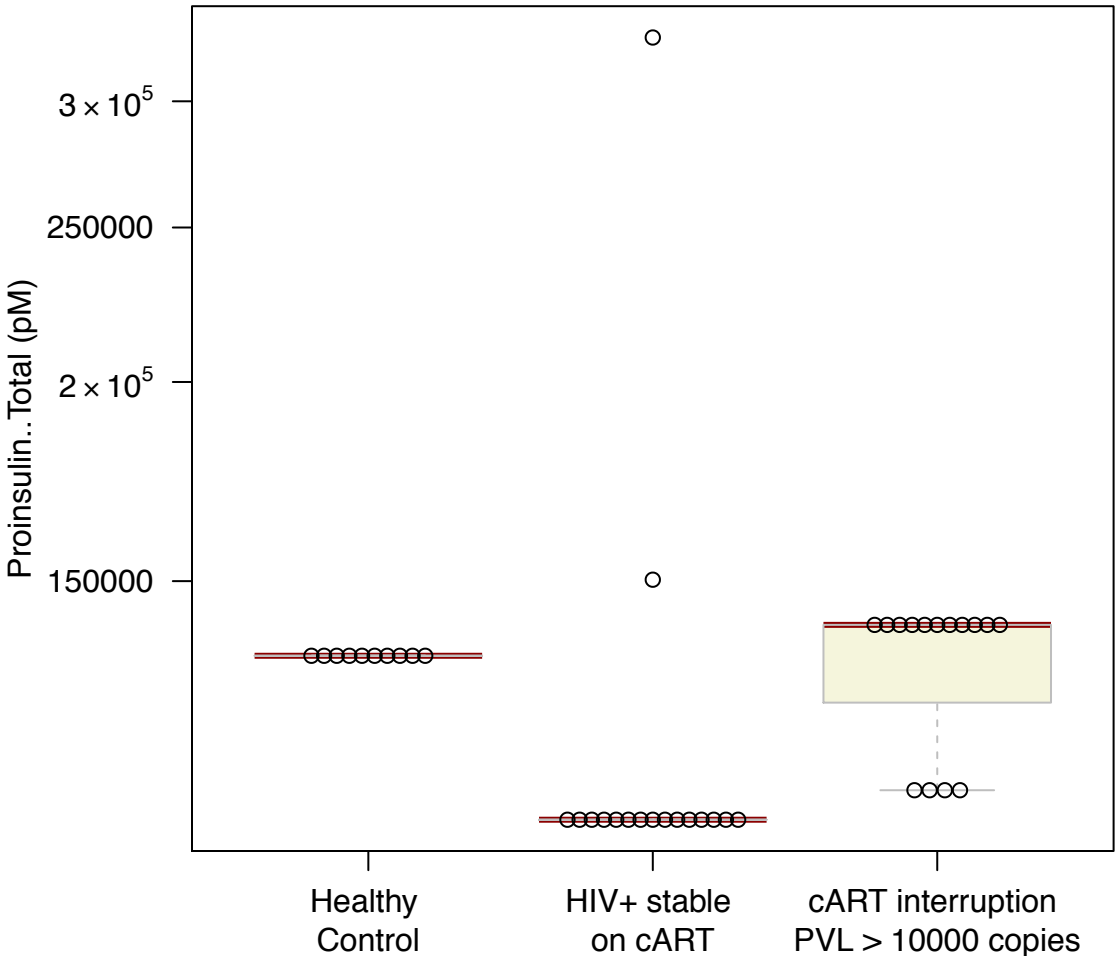

LLOQ: 34 pM

# Prolactin (PRL)

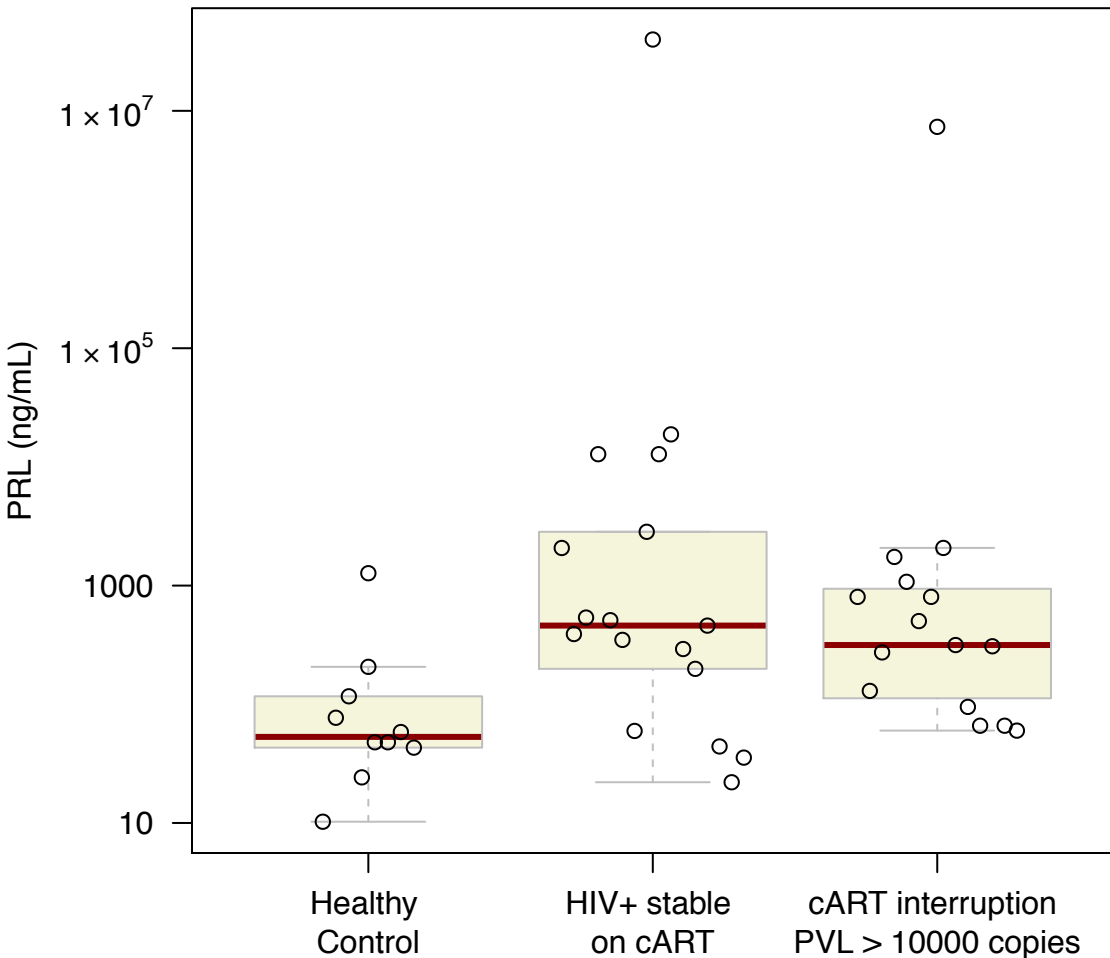

LLOQ: 0.31 ng/mL

# Prostasin

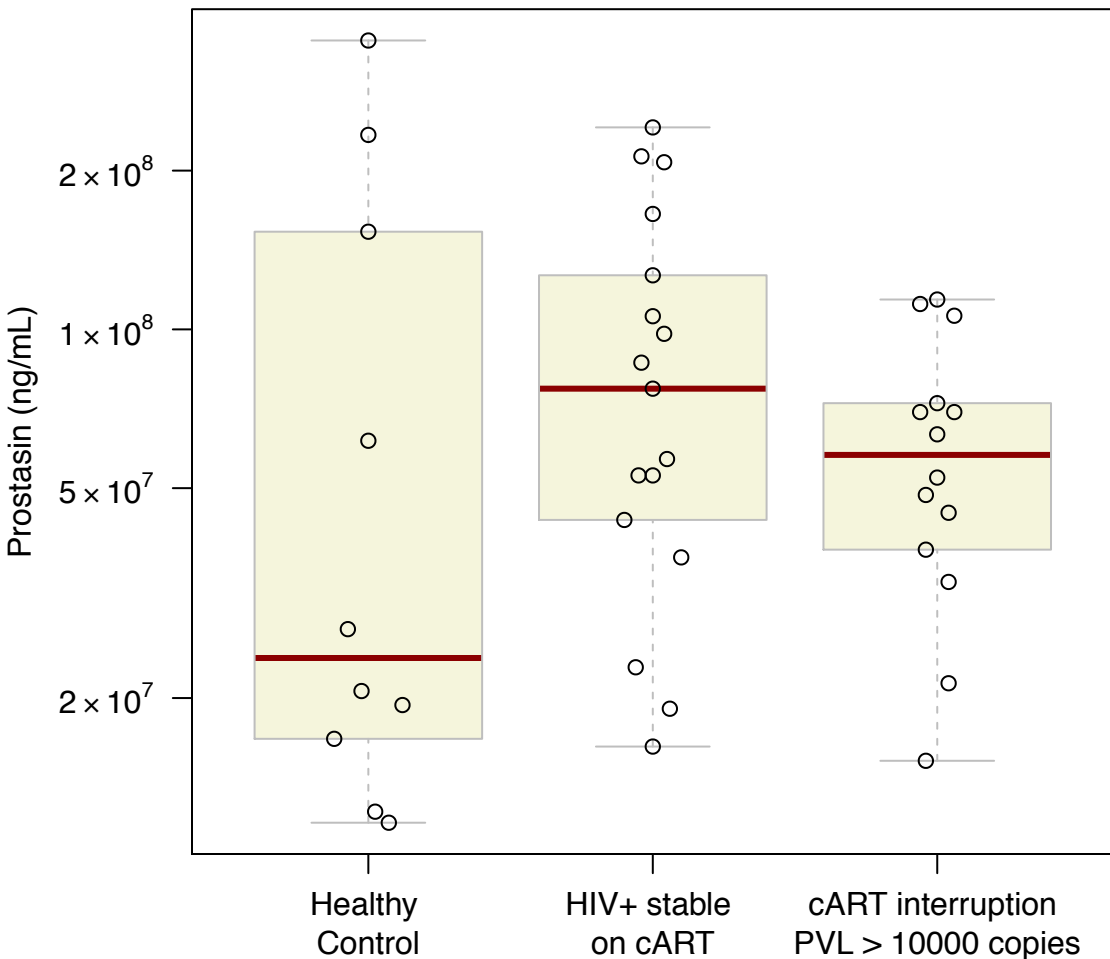

LLOQ: 4.8 ng/mL



# Prostate-Specific Antigen, Free (PSA-f)

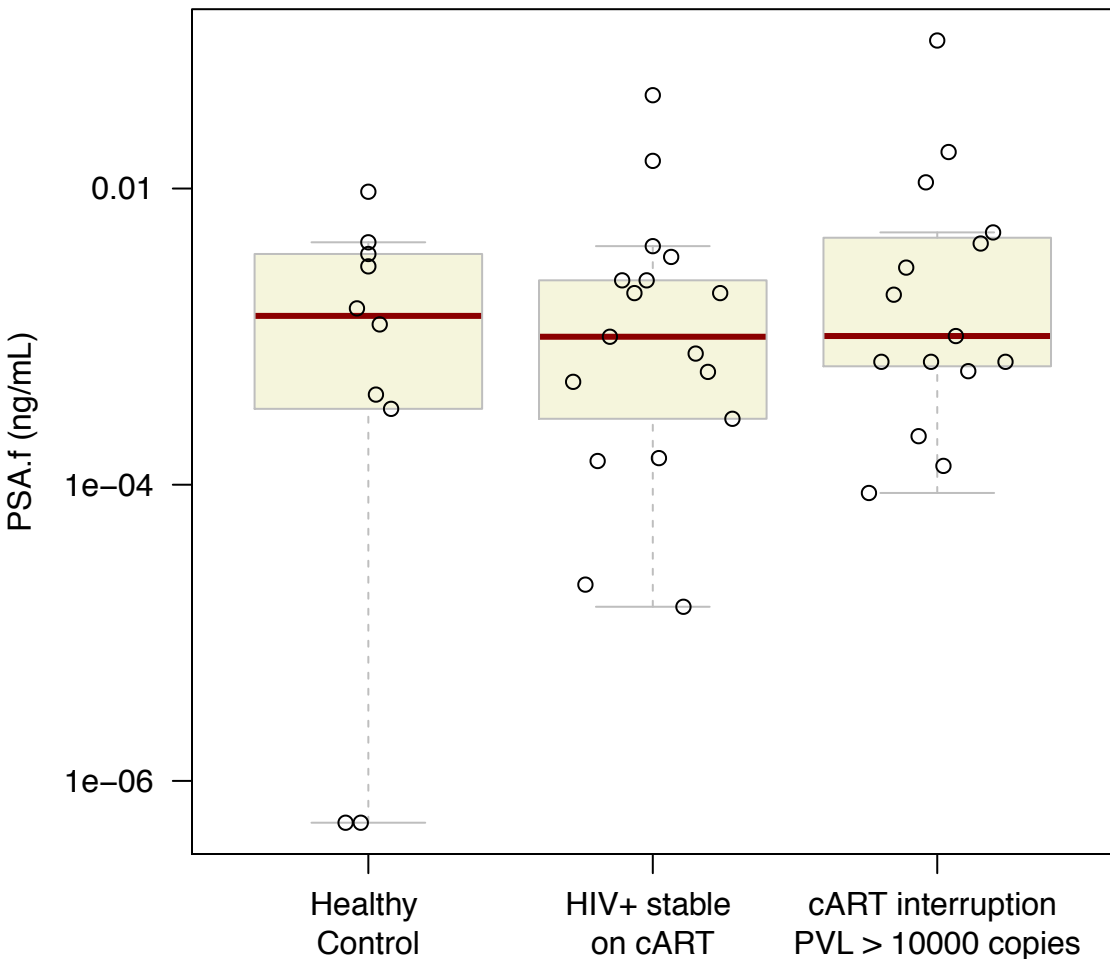

LLOQ: 0.013 ng/mL

# Protein S100-A4 (S100-A4)

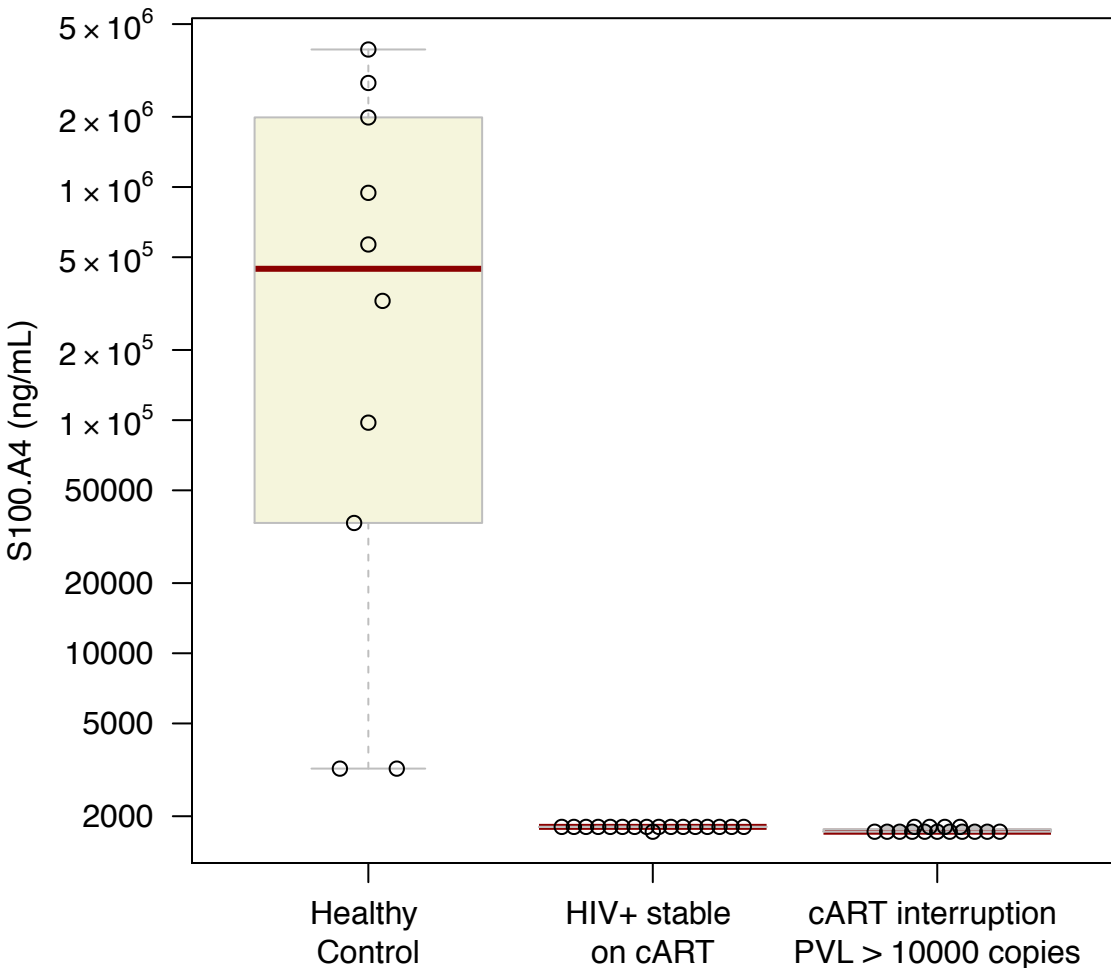

LLOQ: 9.5 ng/mL

# Pulmonary and Activation-Regulated Chemokine (PARC)

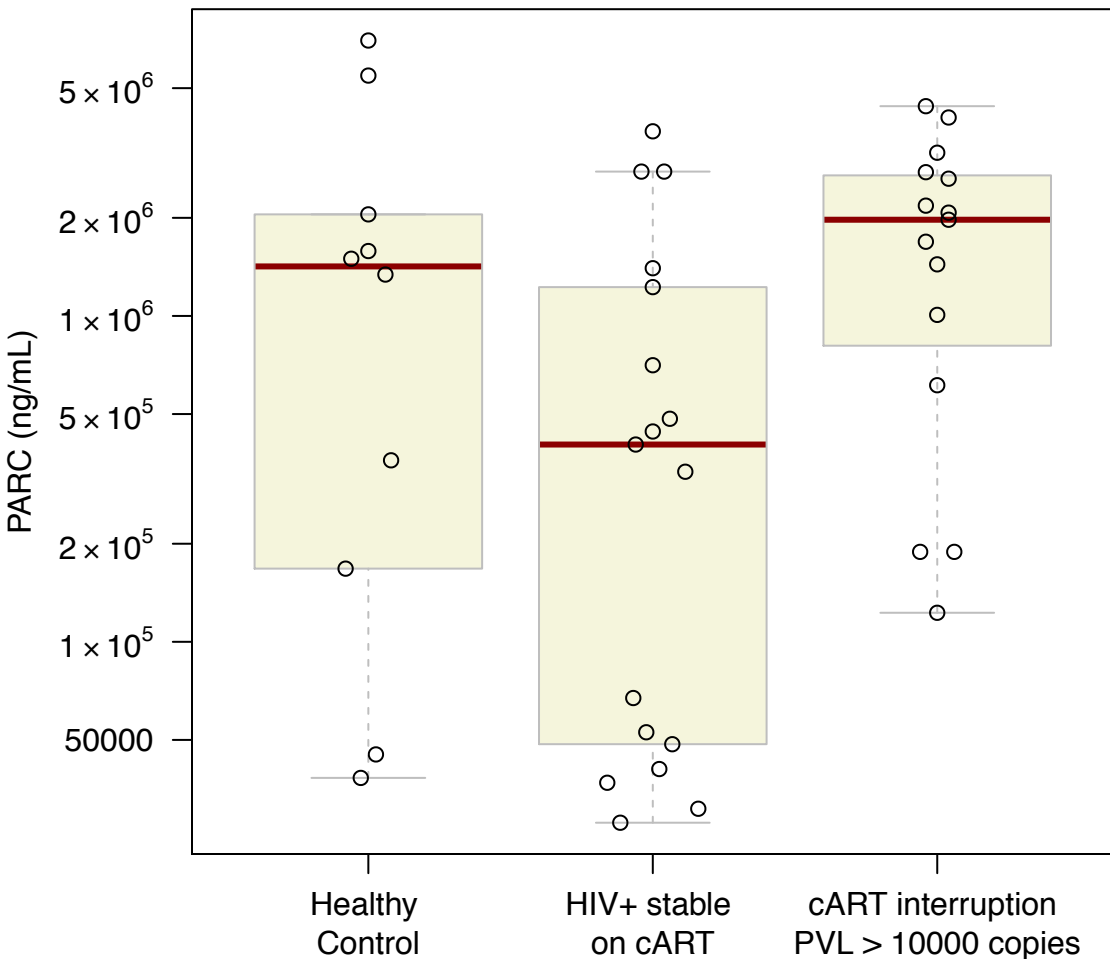

# Receptor for advanced glycosylation end products (RAGE)

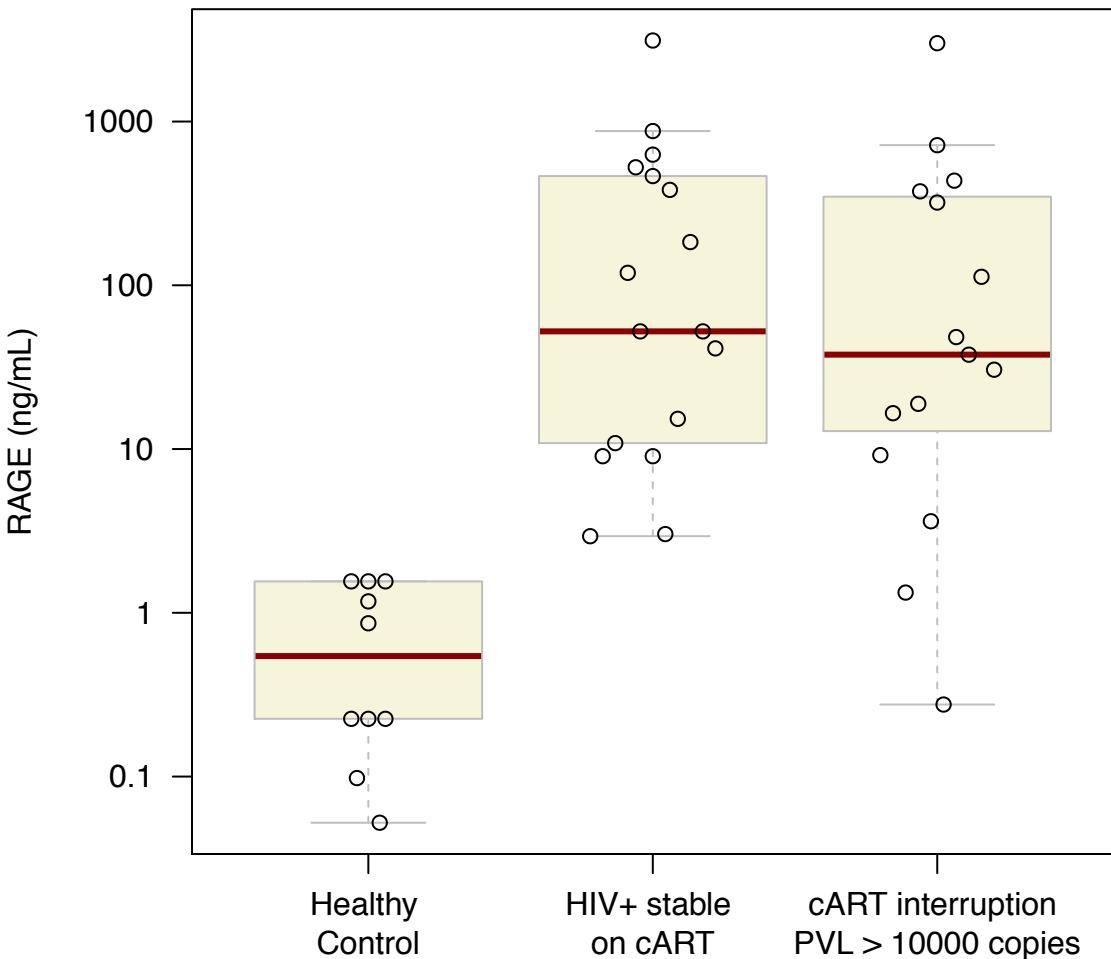

LLOQ: 0.35 ng/mL

# Receptor tyrosine-protein kinase erbB-3 (ErbB3)

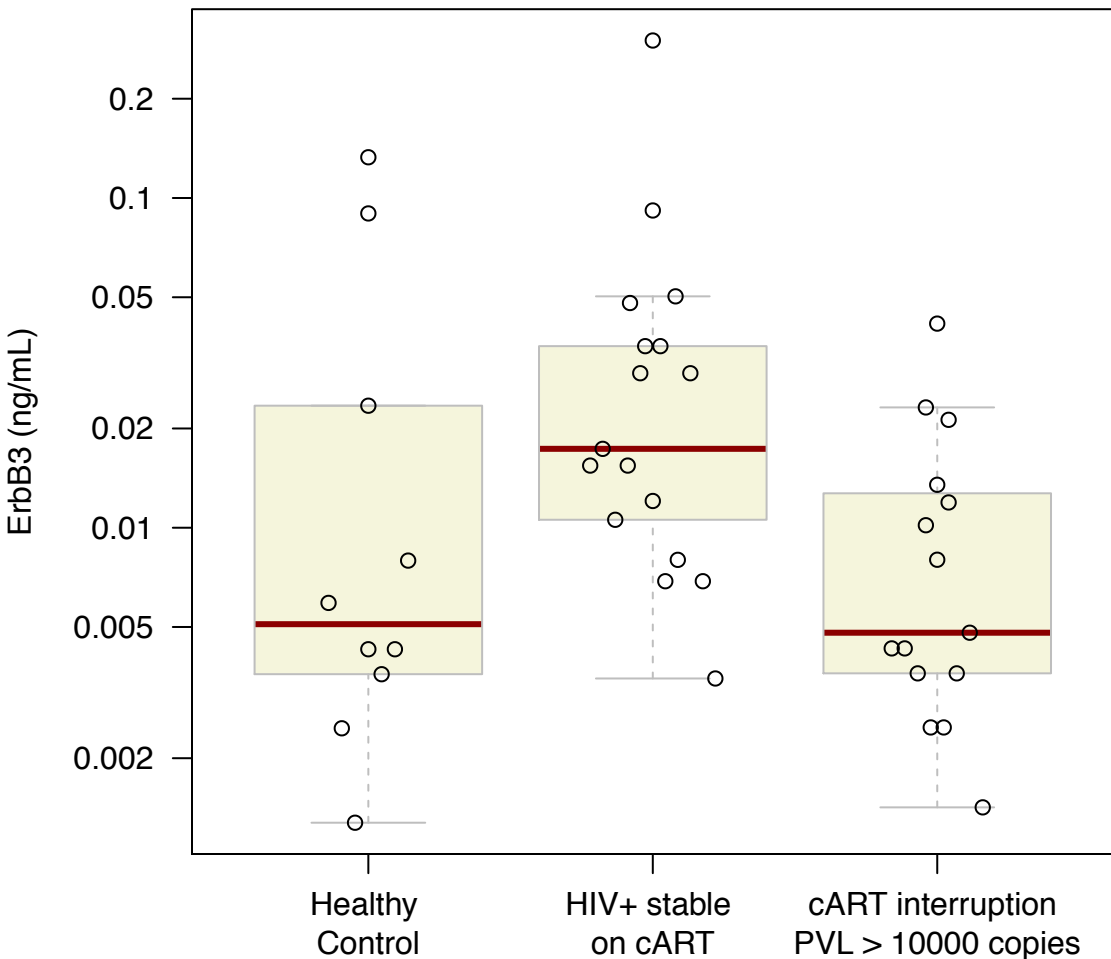

LLOQ: 0.032 ng/mL

# Resistin

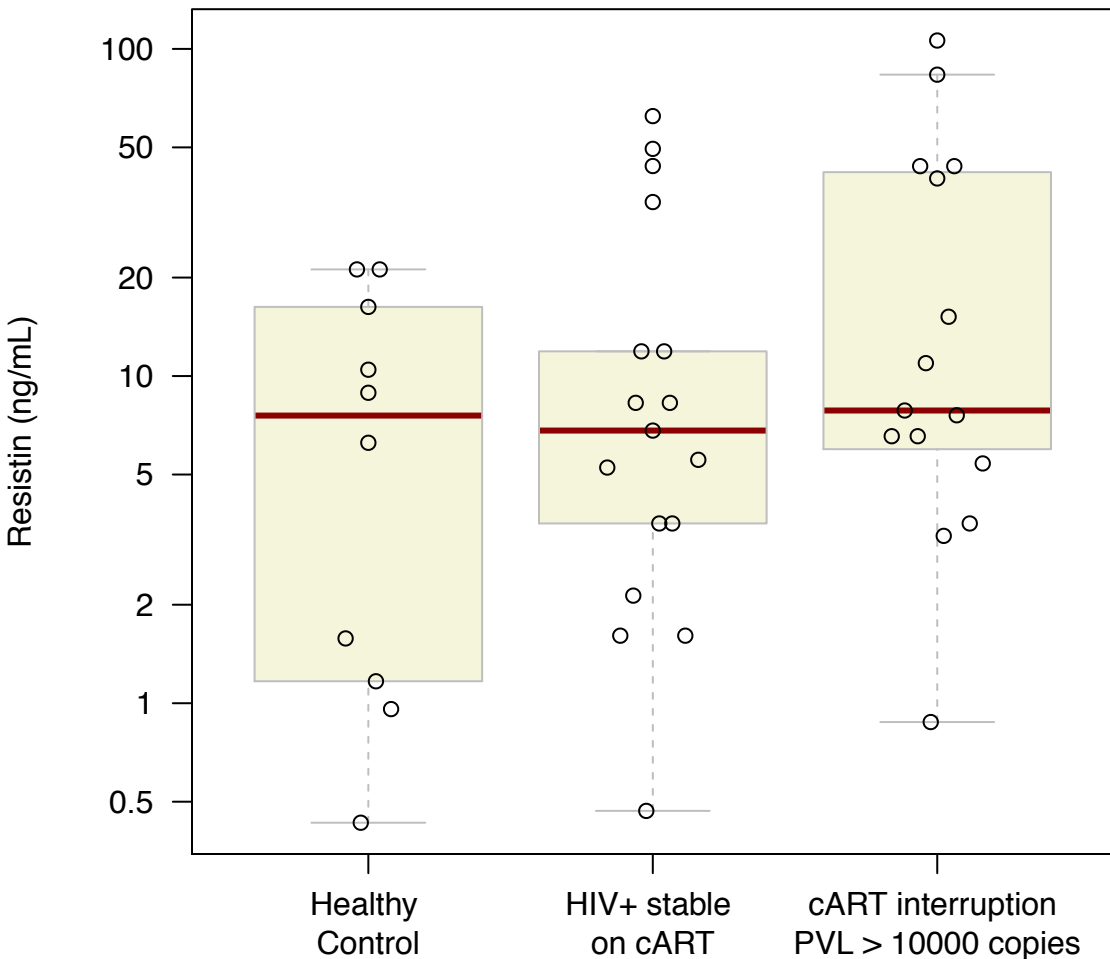

LLOQ: 0.025 ng/mL

# S100 calcium-binding protein B (S100-B)

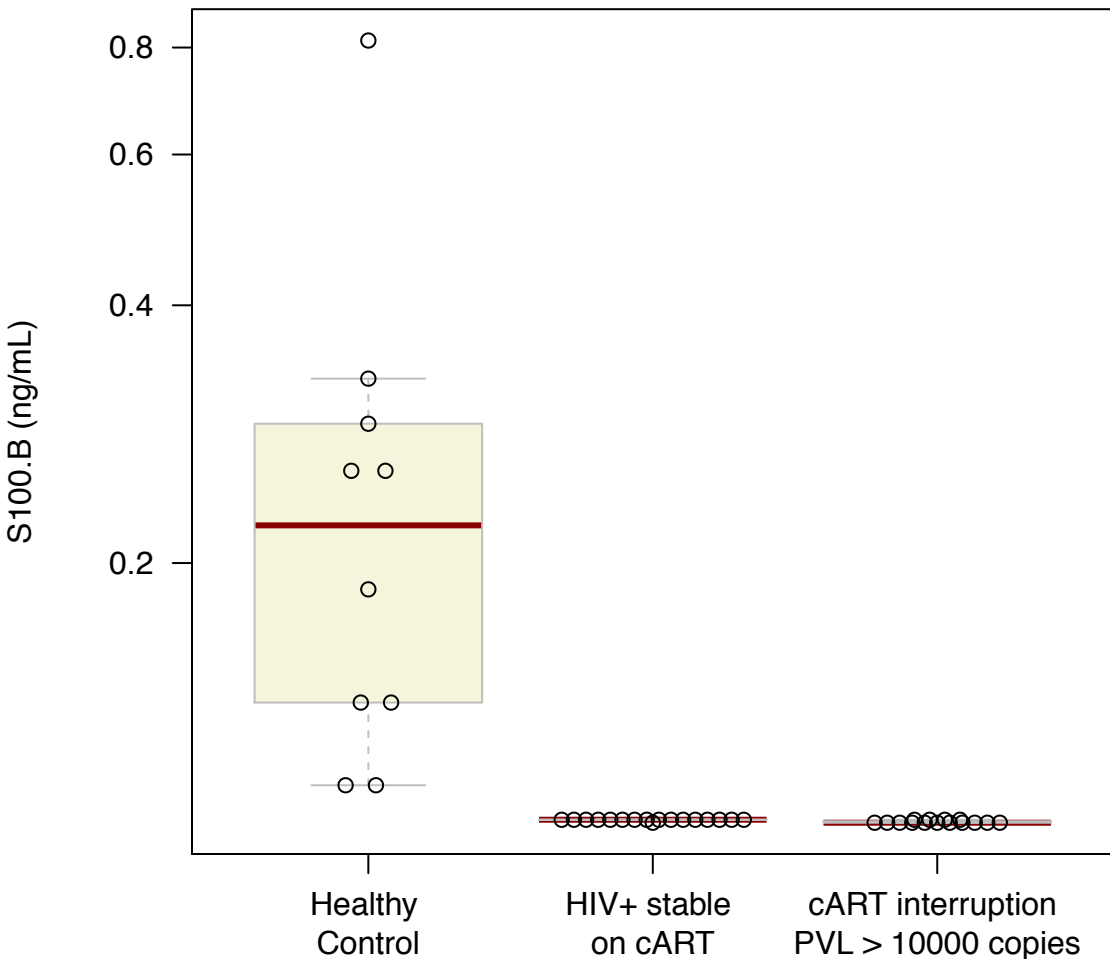

LLOQ: 0.5 ng/mL

# Serotransferrin (Transferrin)

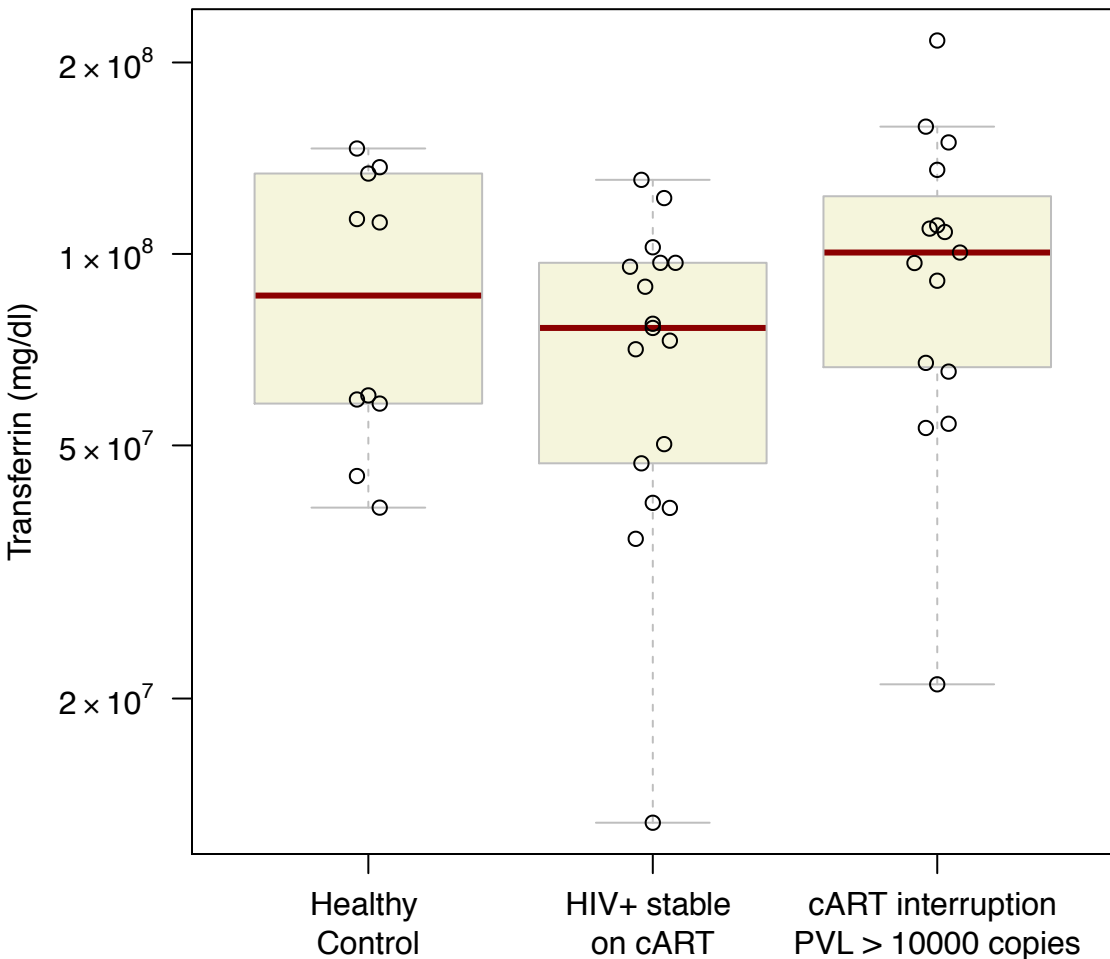



# Serum Amyloid P-Component (SAP)

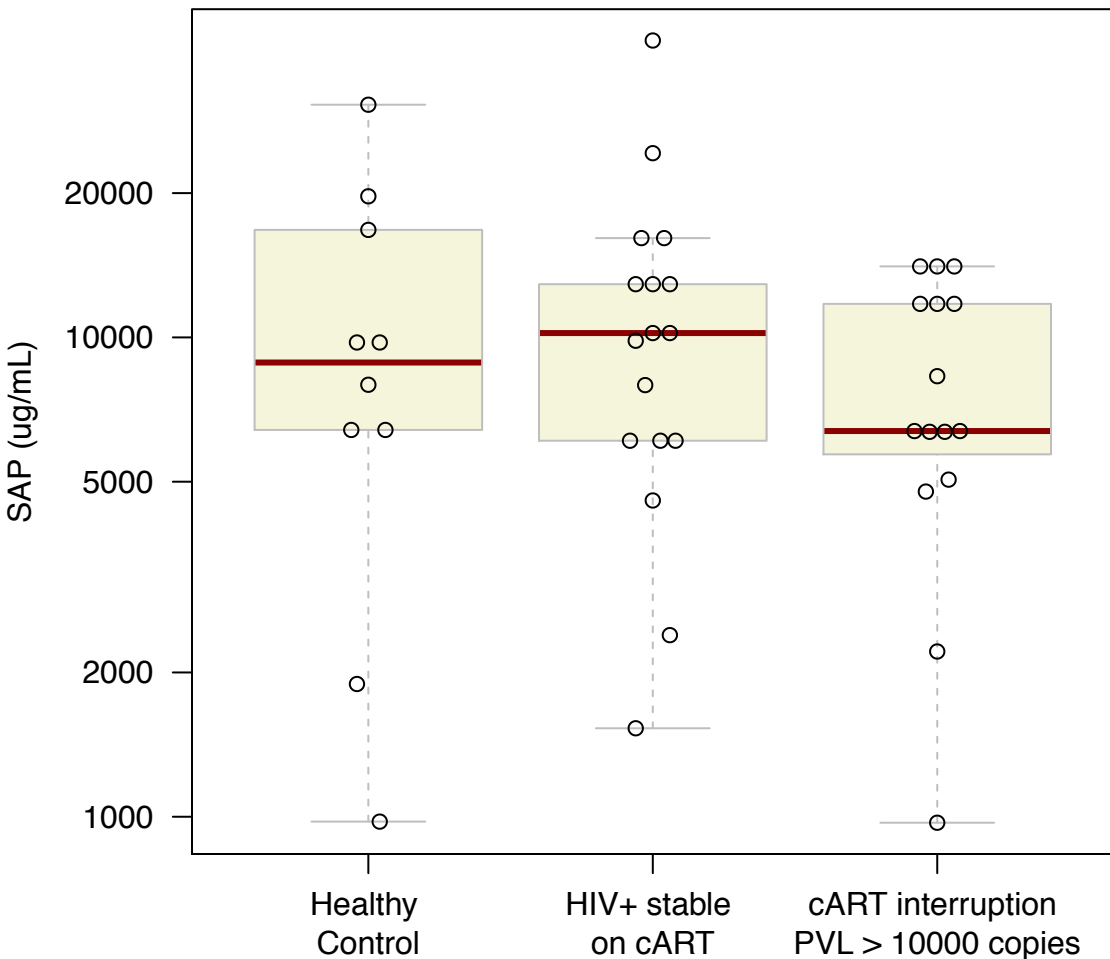

LLOQ: 0.074 ug/mL

# Sex Hormone–Binding Globulin (SHBG)

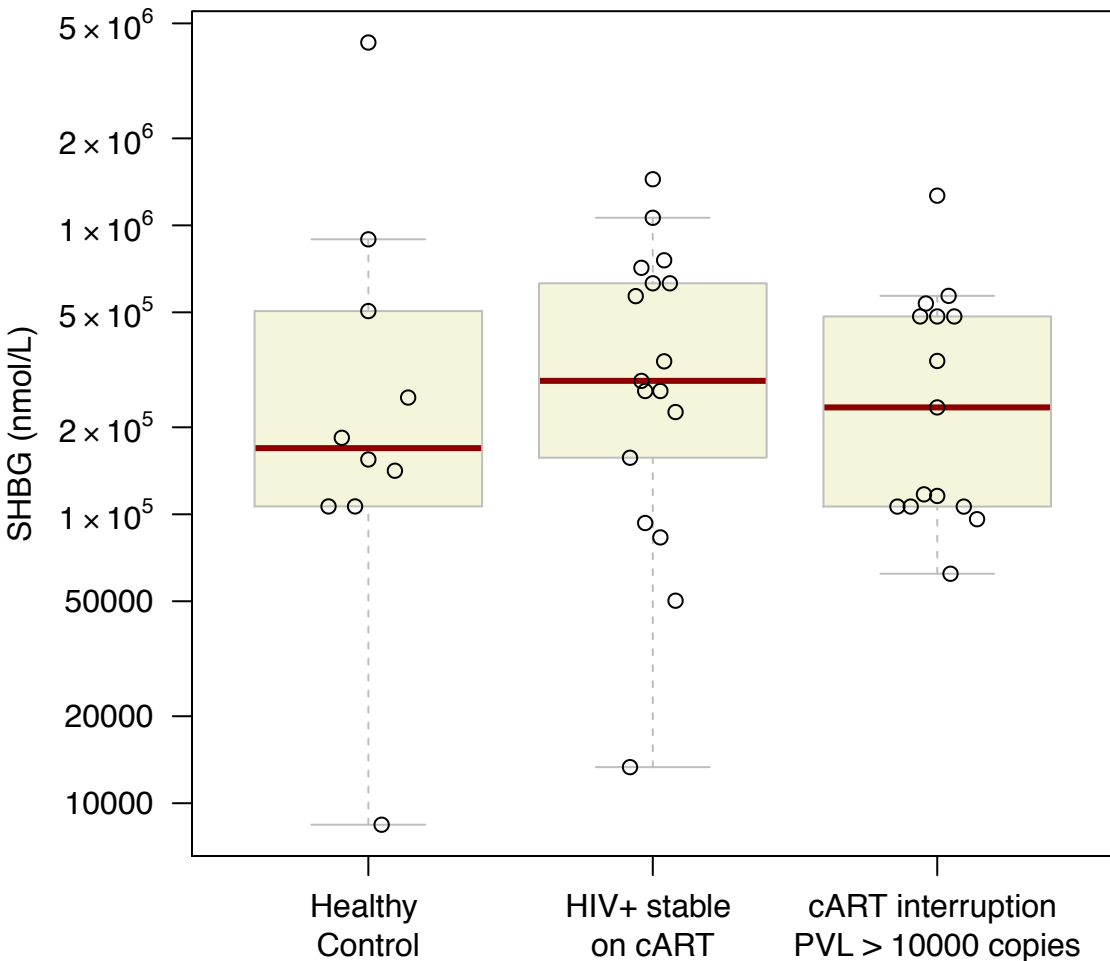

LLOQ: 9.7 nmol/L

# Sortilin

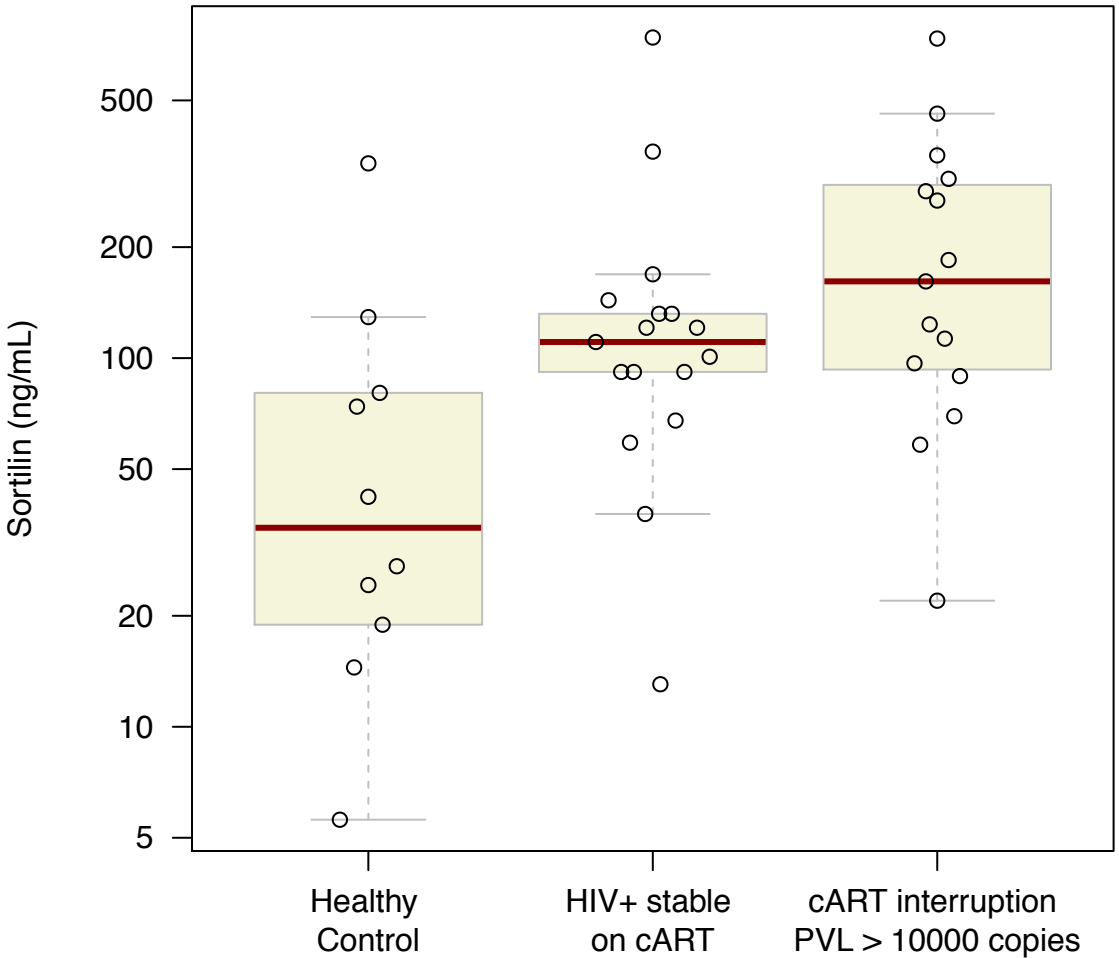

LLOQ: 0.22 ng/mL



# Stem Cell Factor (SCF)

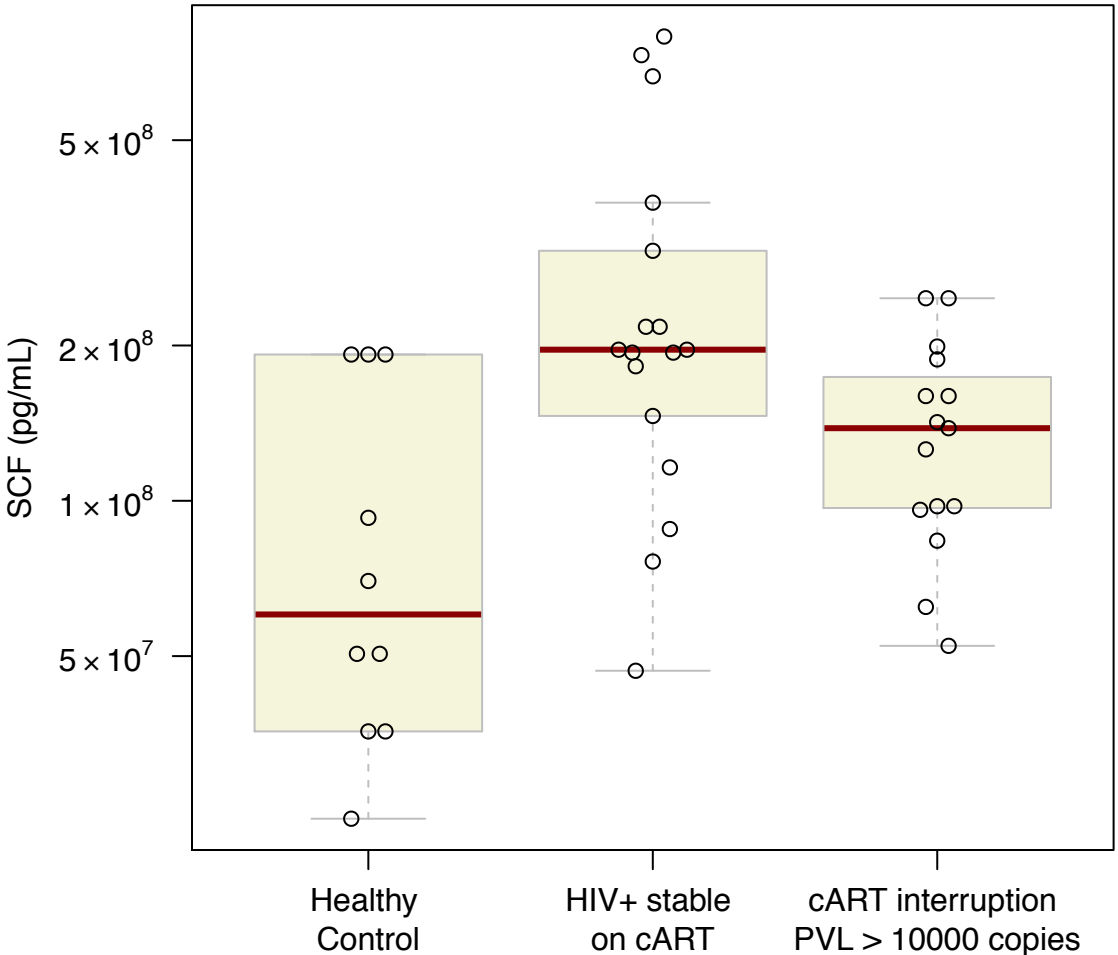

LLOQ: 83 pg/mL

# Stromal cell-derived factor-1 (SDF-1)

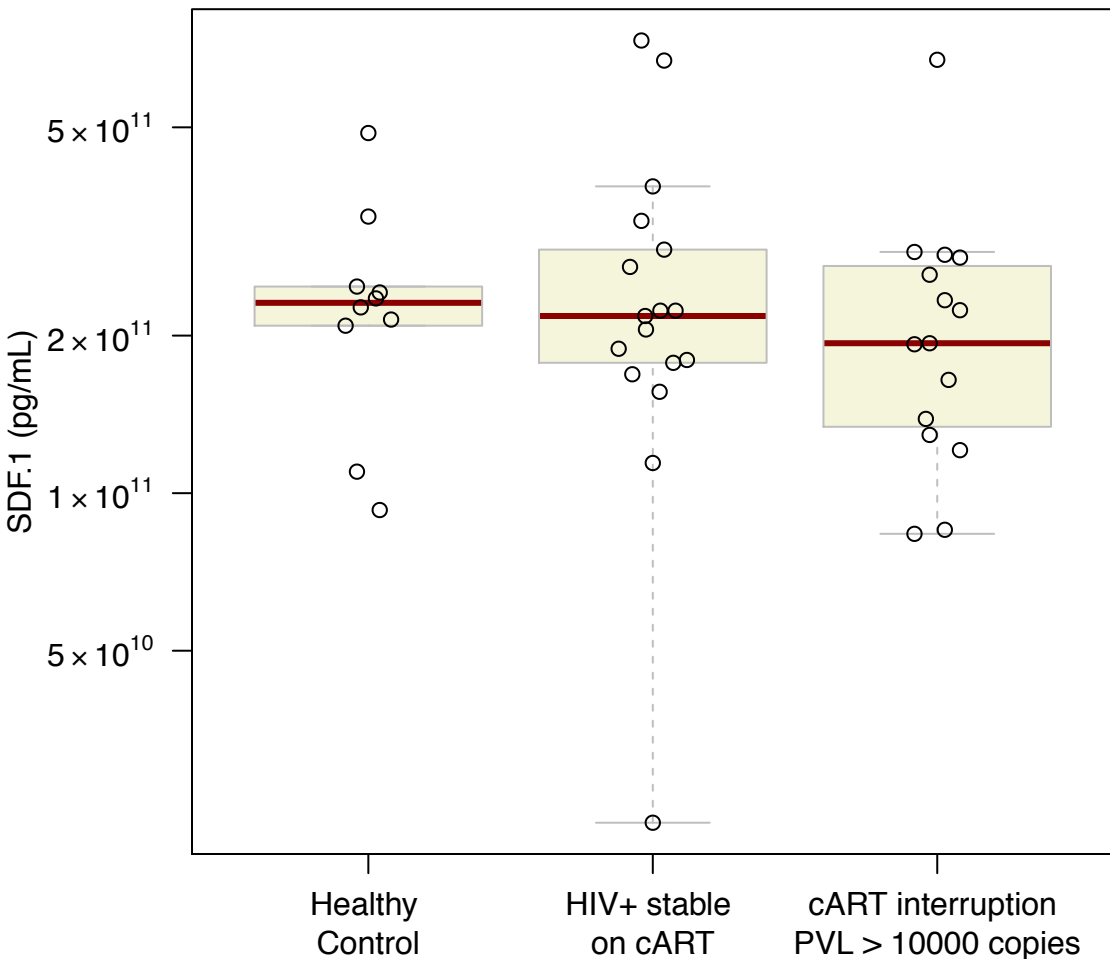

# Superoxide Dismutase 1, soluble (SOD-1)

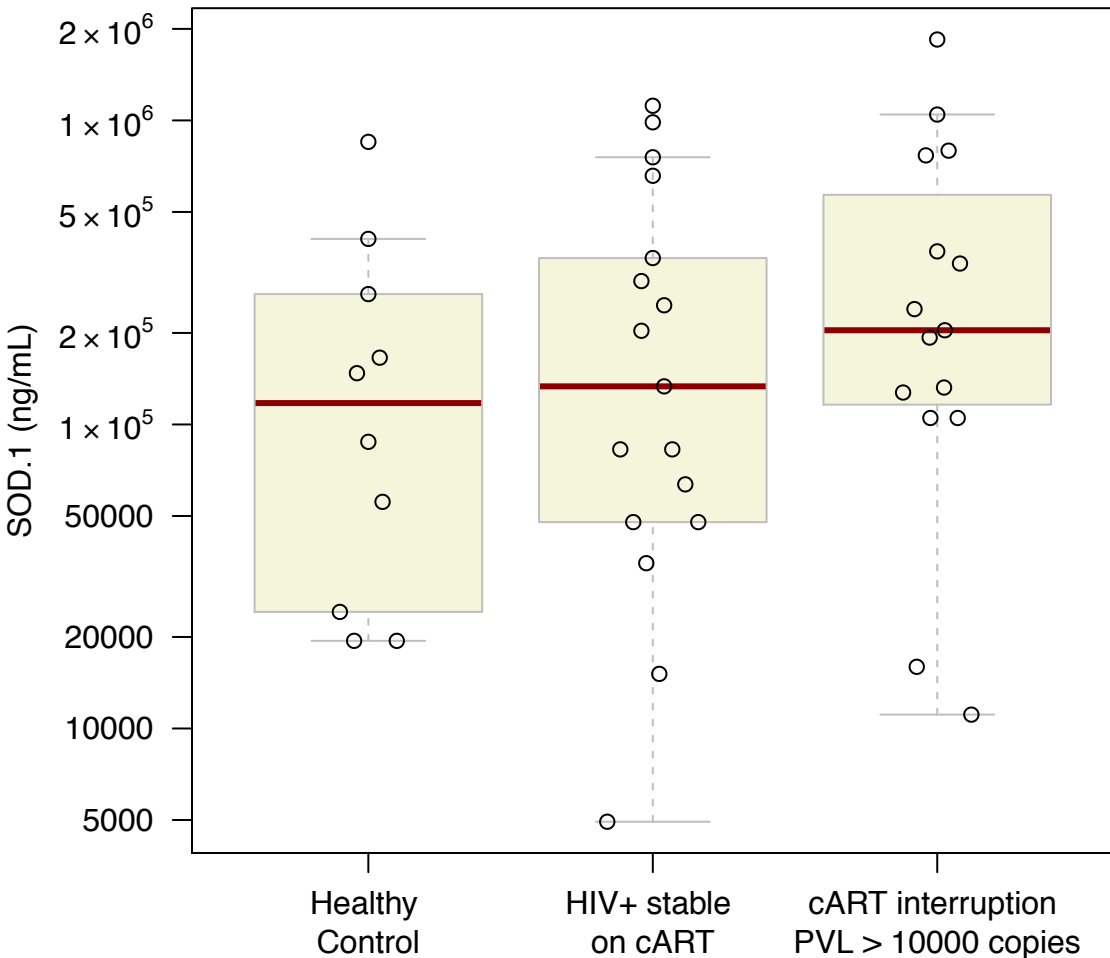

LLOQ: 0.12 ng/mL

# T-Cell-Specific Protein RANTES (RANTES)

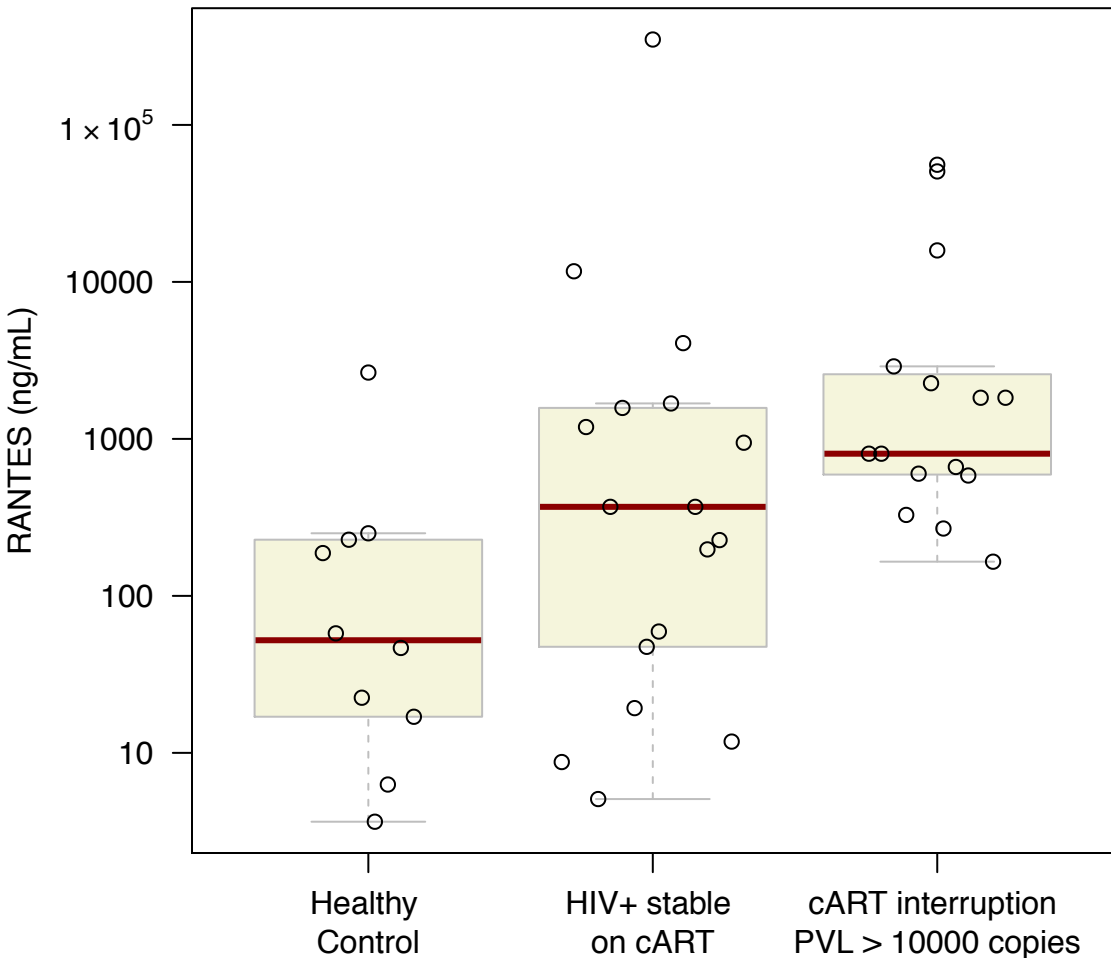

LLOQ: 0.024 ng/mL



# T Lymphocyte-Secreted Protein I-309 (I-309)

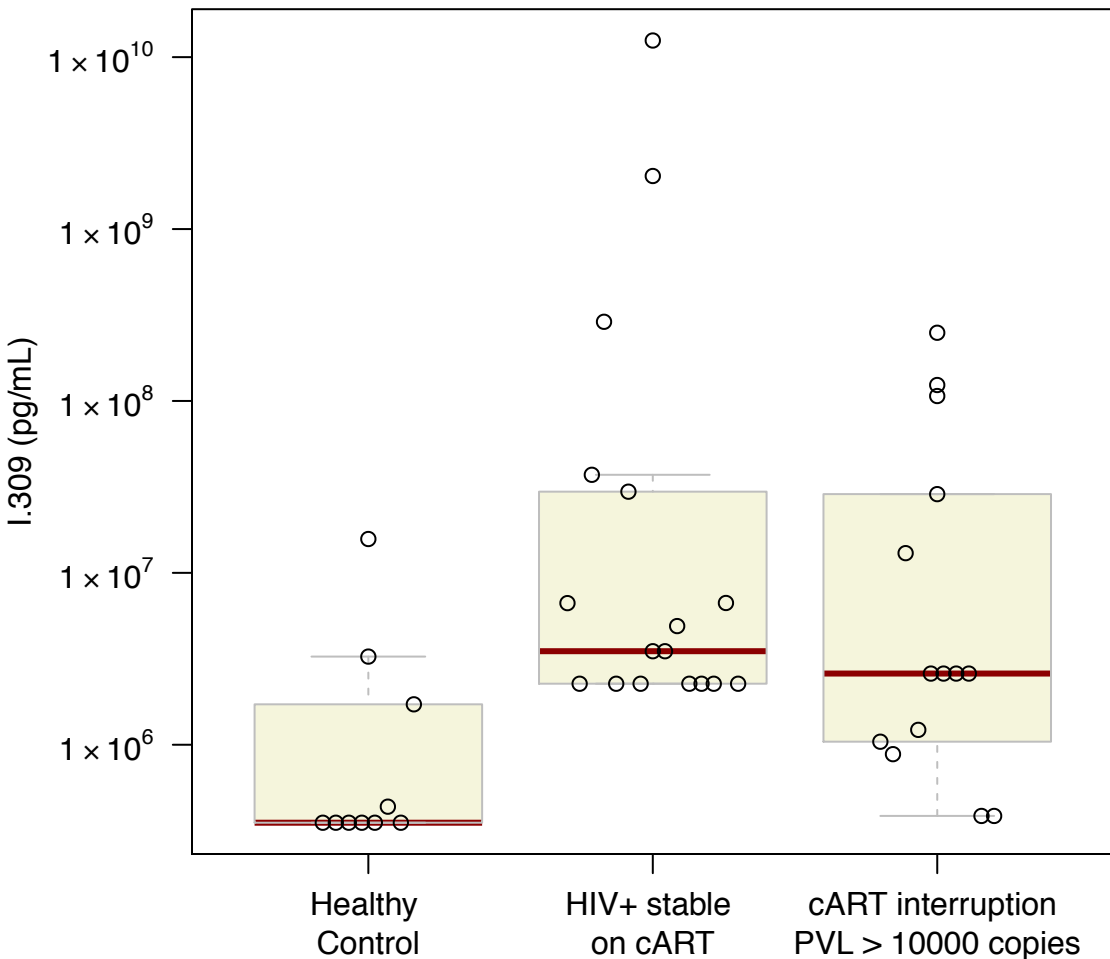

LLOQ: 57 pg/mL

# Tamm–Horsfall Urinary Glycoprotein (THP)

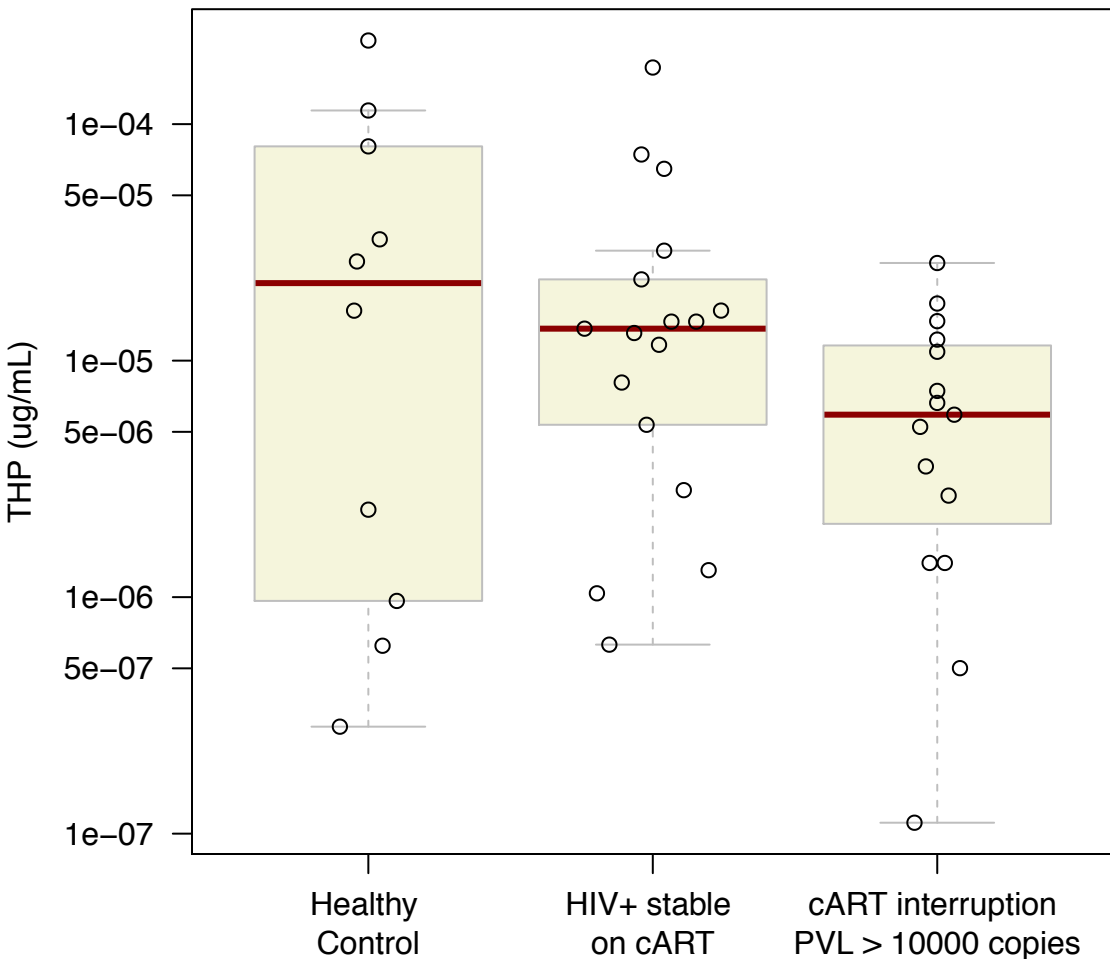

LLOQ: 0.00057 ug/mL

# Tenascin-C (TN-C)

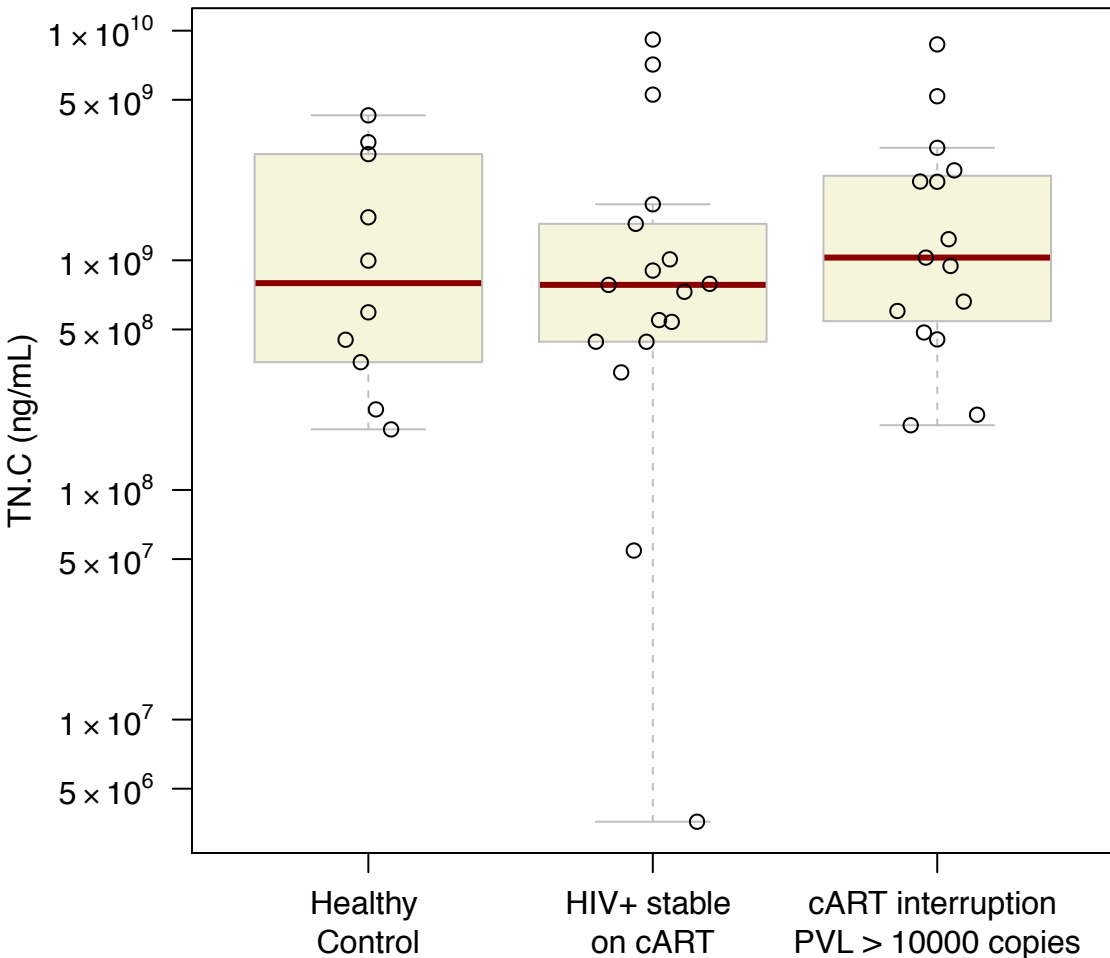

LLOQ: 48 ng/mL

# Testosterone, Total

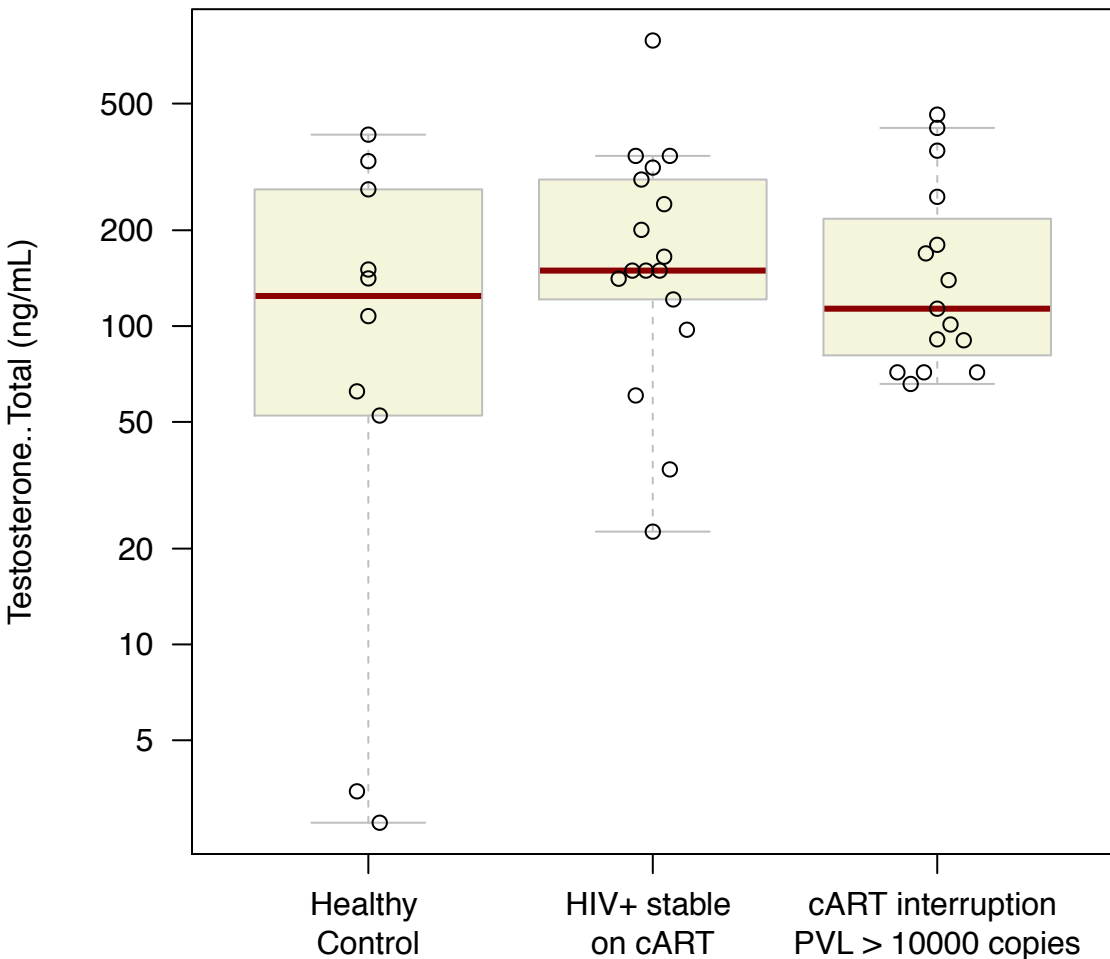

# Tetranectin

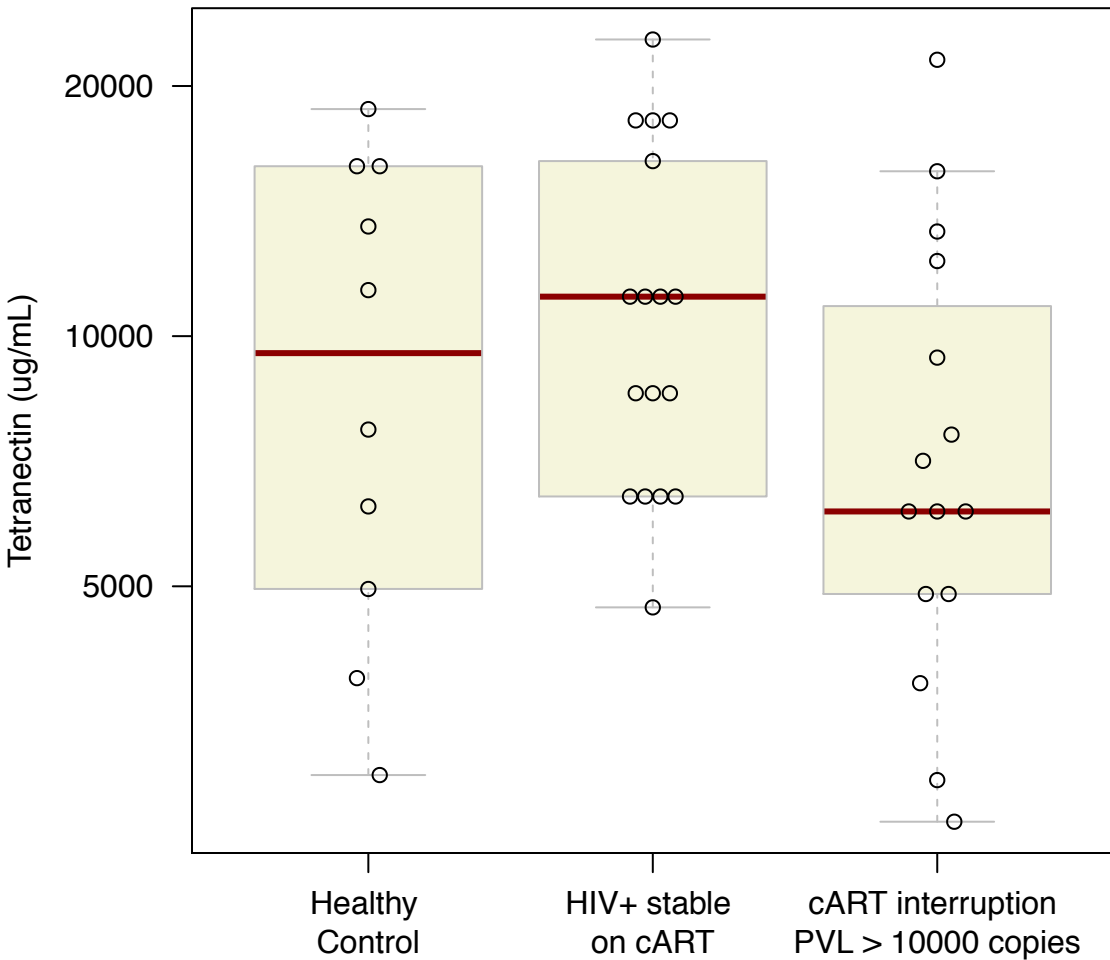

LLOQ: 1.3 ug/mL

# Thrombomodulin (TM)

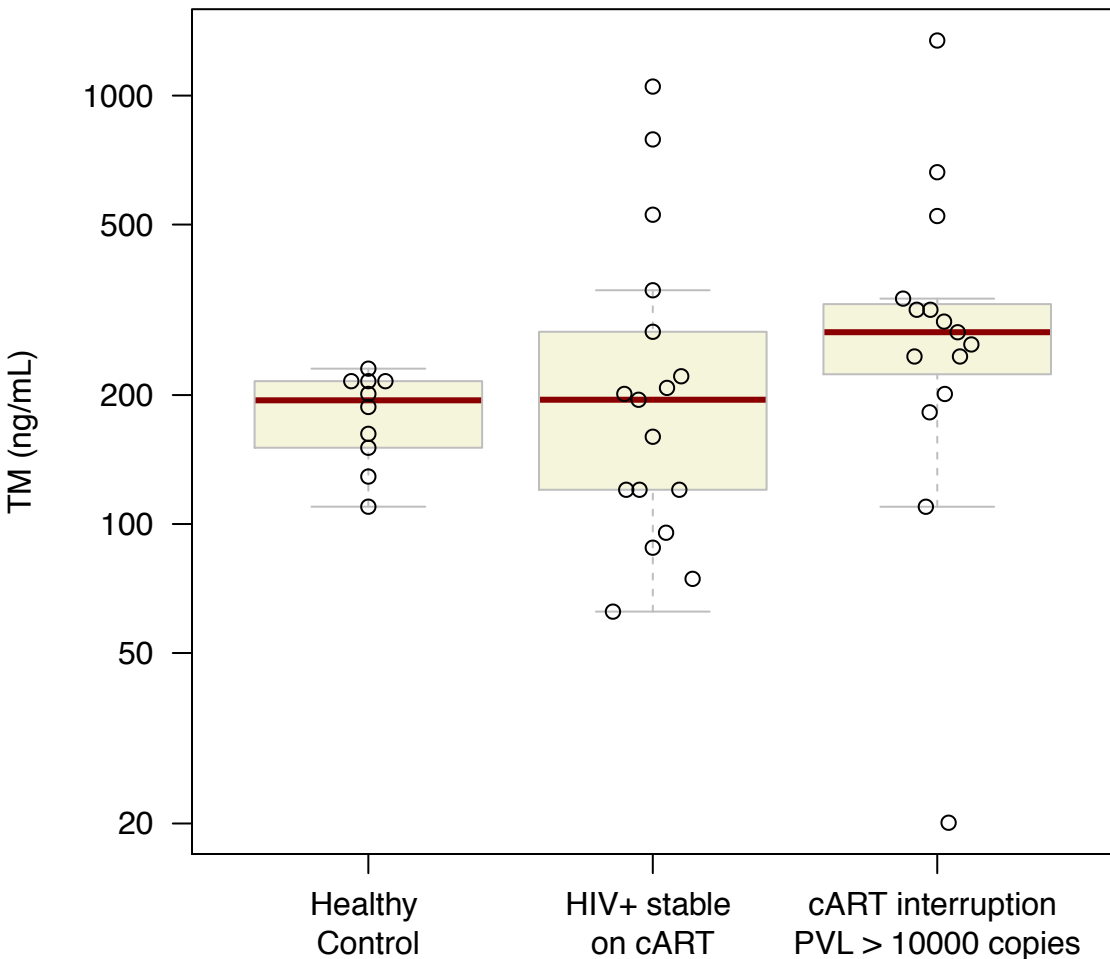

LLOQ: 0.1 ng/mL

# Thrombospondin-1

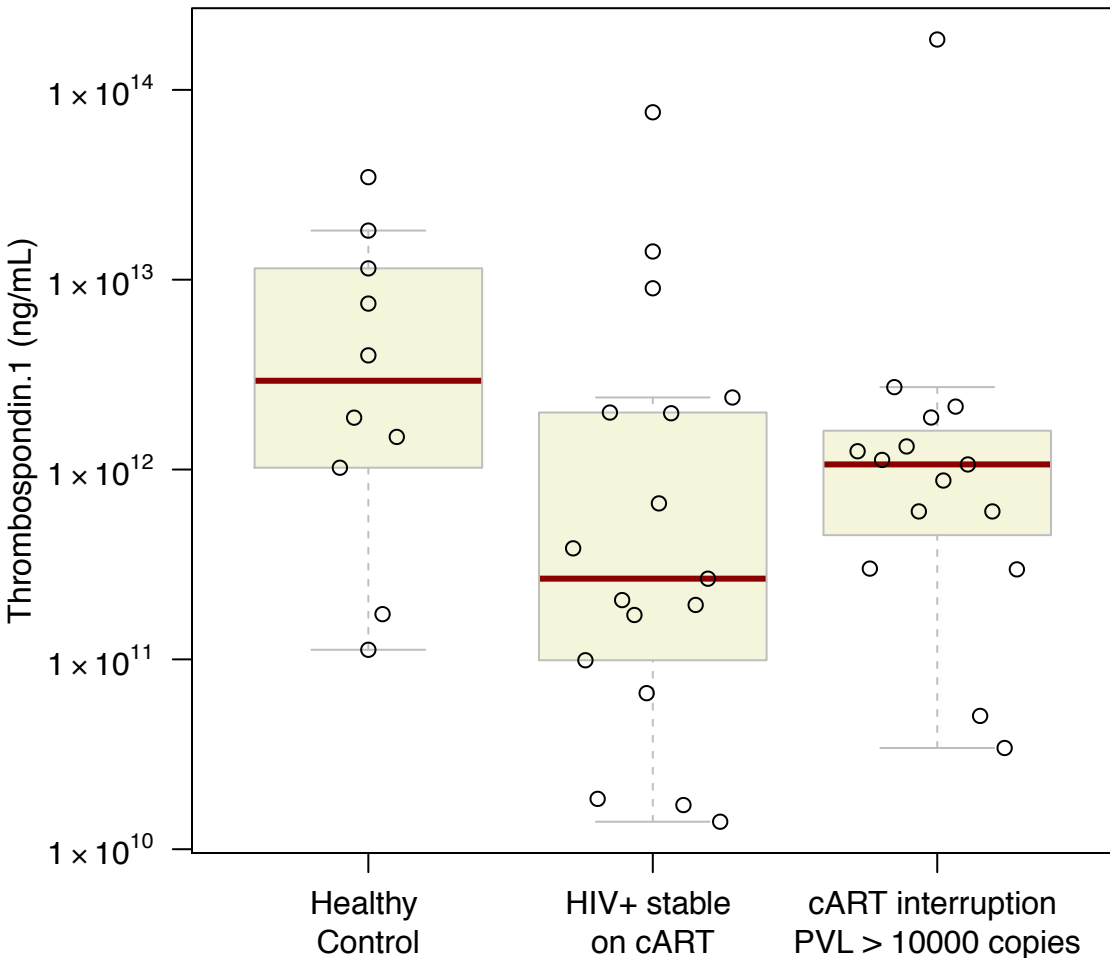

# Thyroglobulin (TG)

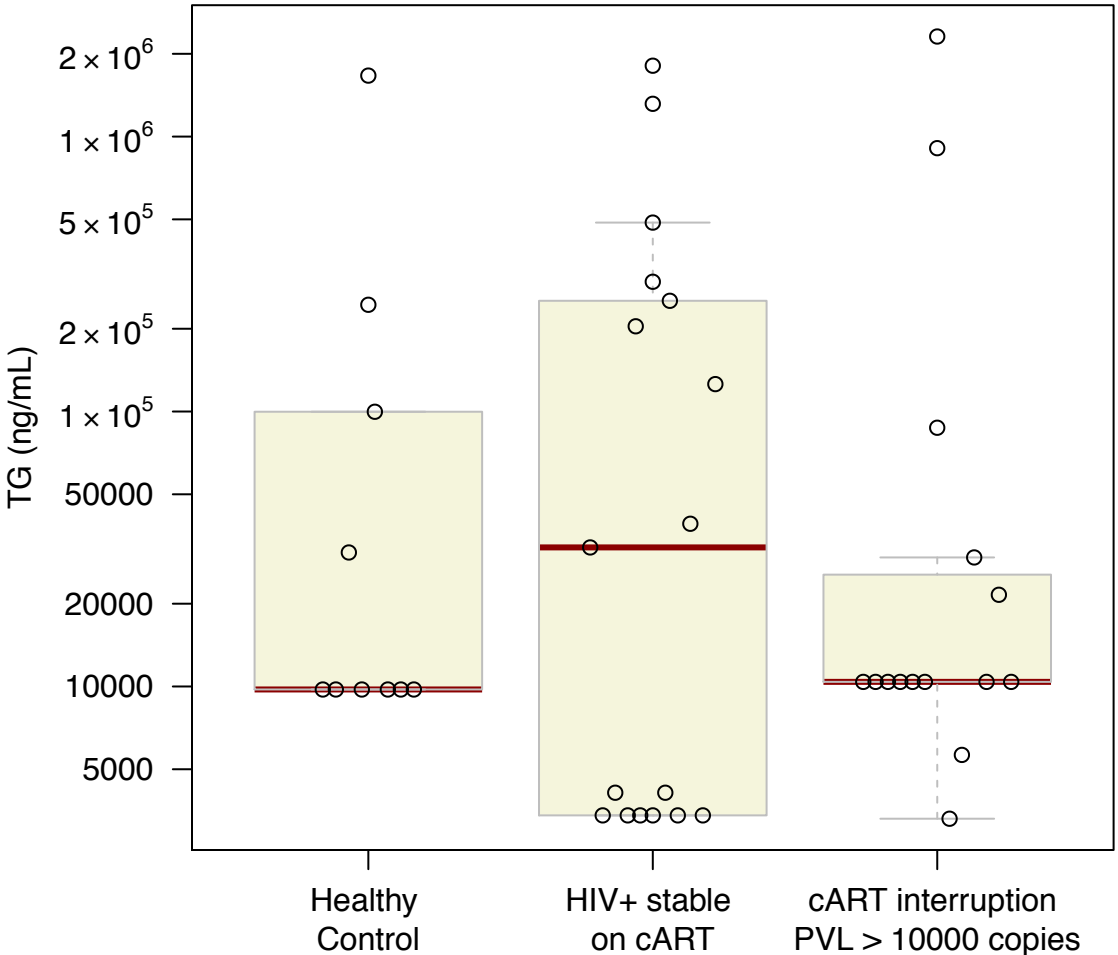

LLOQ: 14 ng/mL



# Thyroid-Stimulating Hormone (TSH)

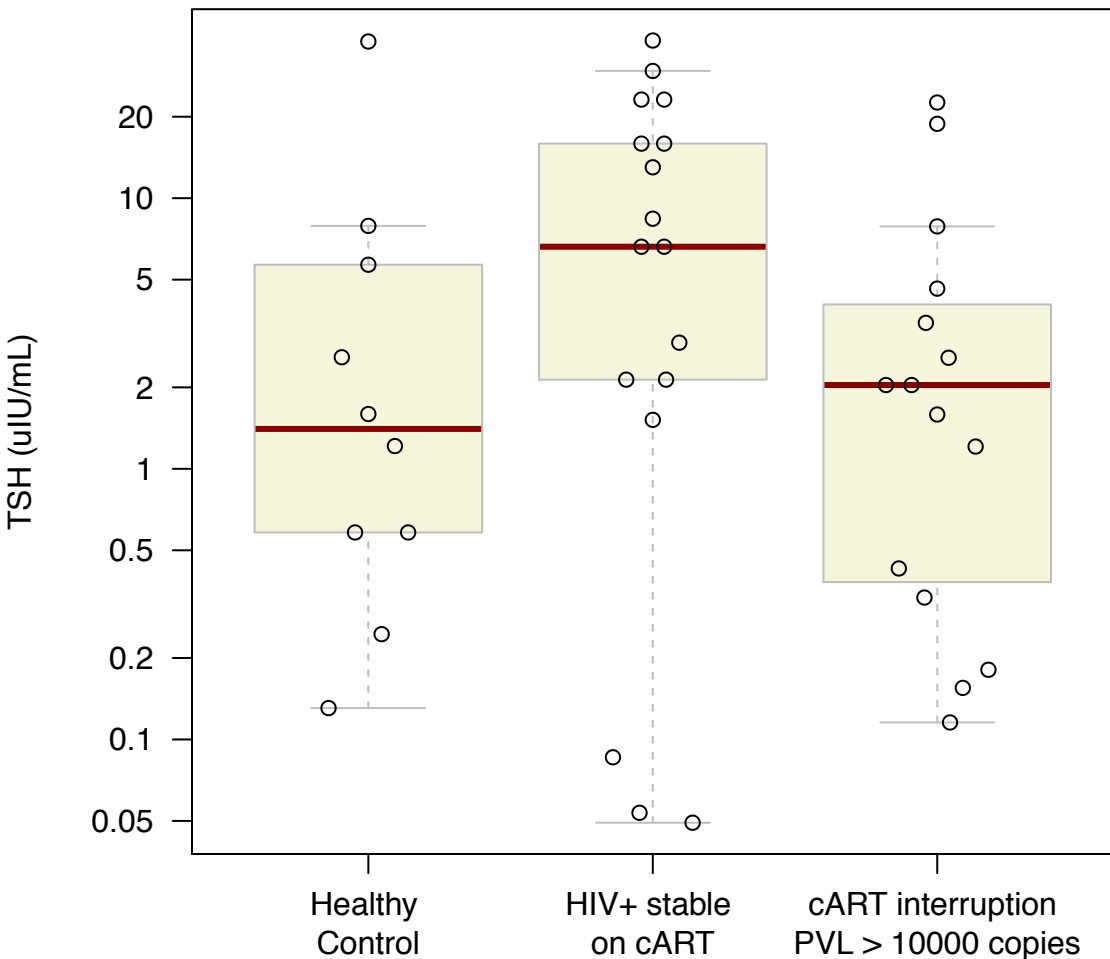

LLOQ: 0.039 uIU/mL

# Thyroxine–Binding Globulin (TBG)

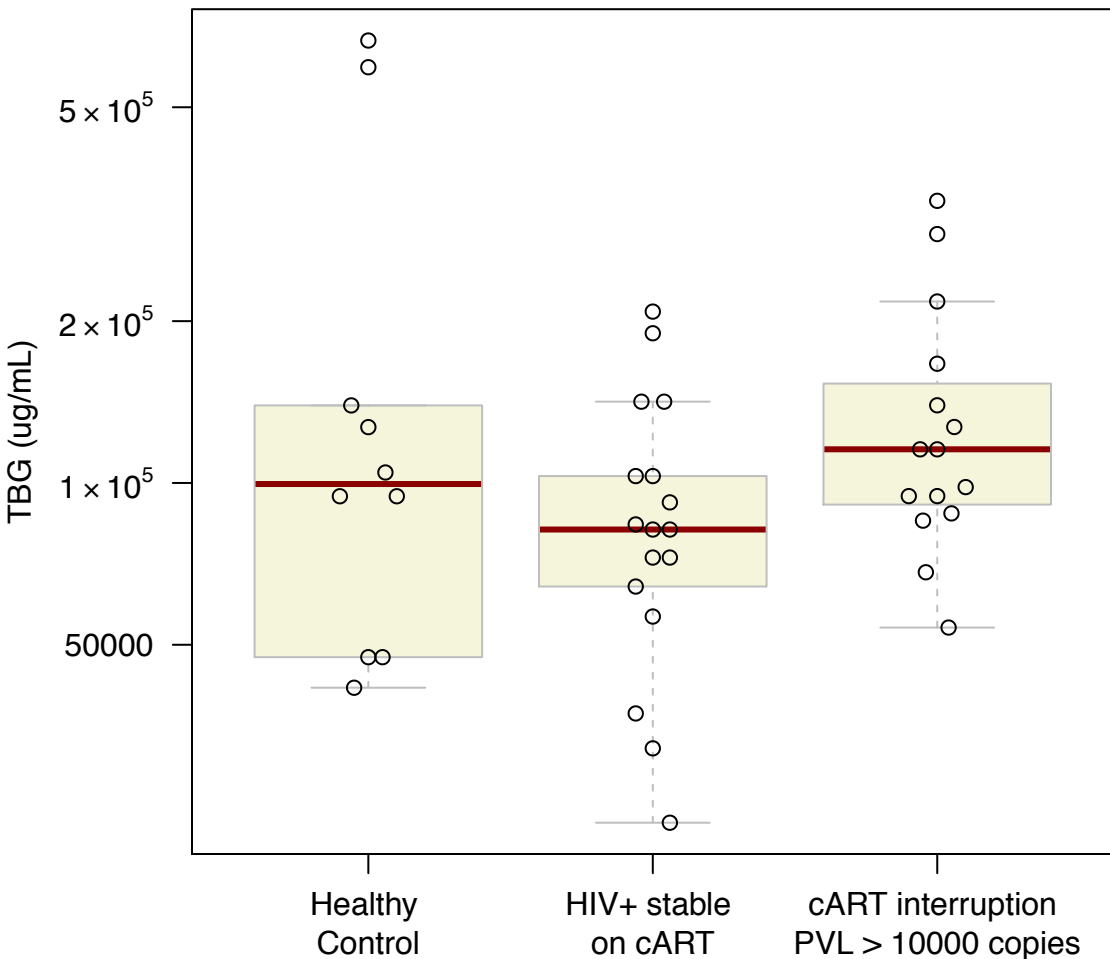

LLOQ: 0.12 ug/mL

# Tissue Inhibitor of Metalloproteinases 1 (TIMP-1)

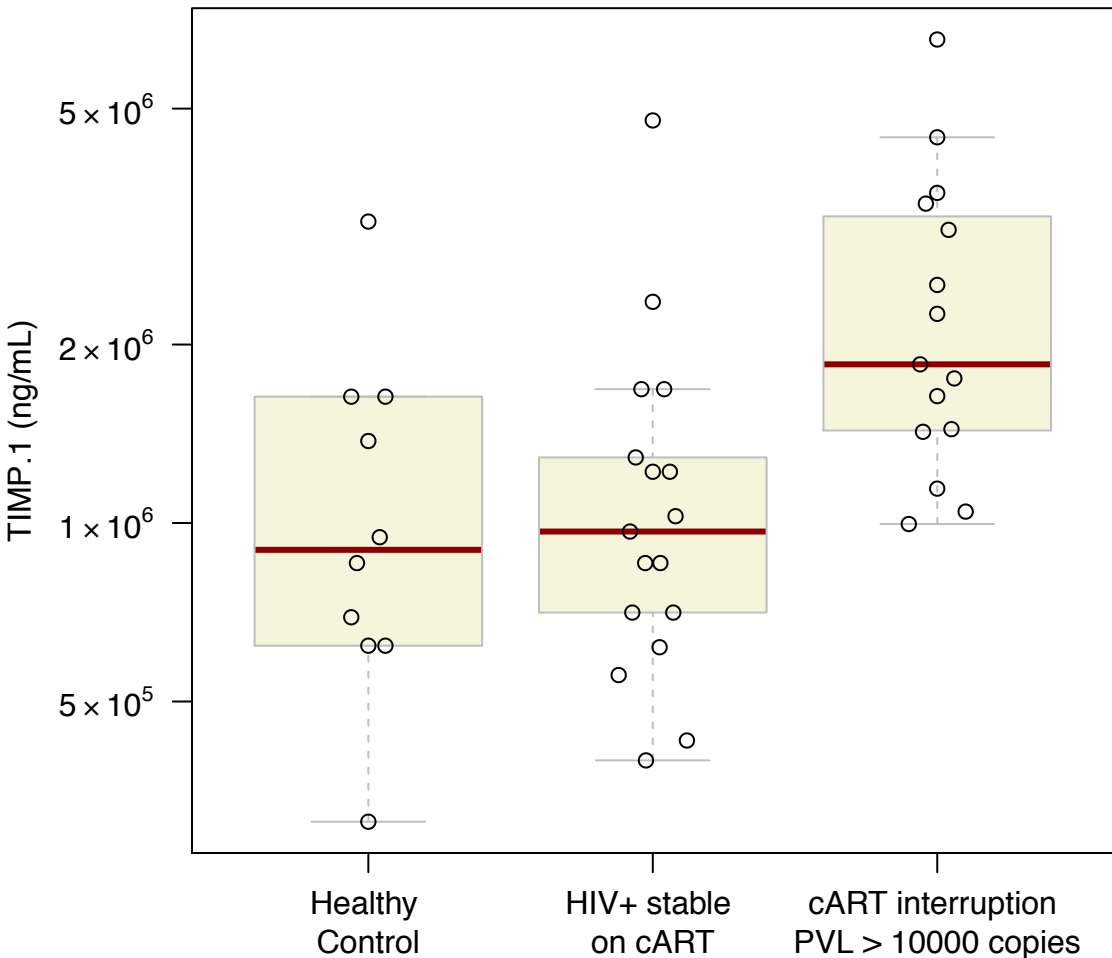

LLOQ: 1.2 ng/mL

# Tissue type Plasminogen activator (tPA)

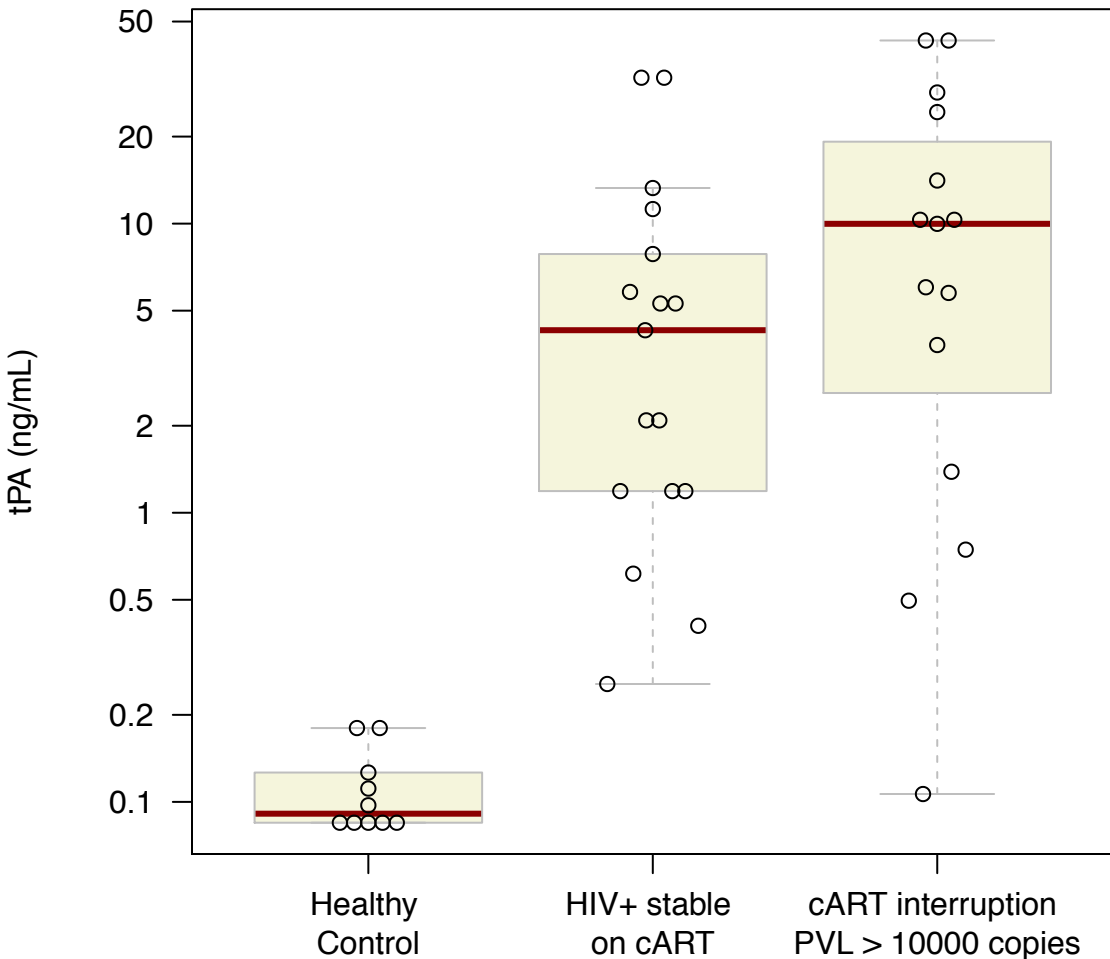

LLOQ: 0.44 ng/mL

# TRAIL-Related Apoptosis-Inducing Ligand Receptor 3 (TRAIL.R3)

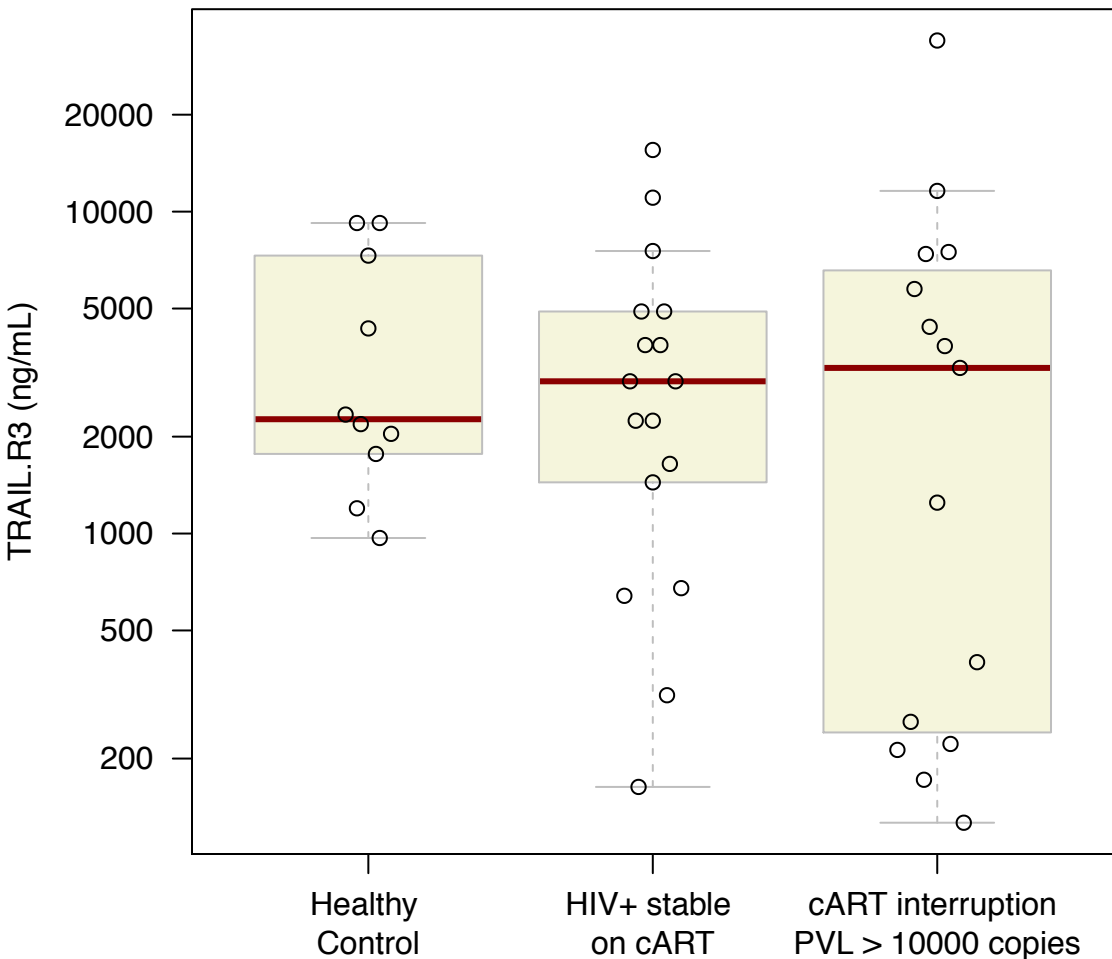

LLOQ: 0.96 ng/mL

# Transthyretin (TTR)

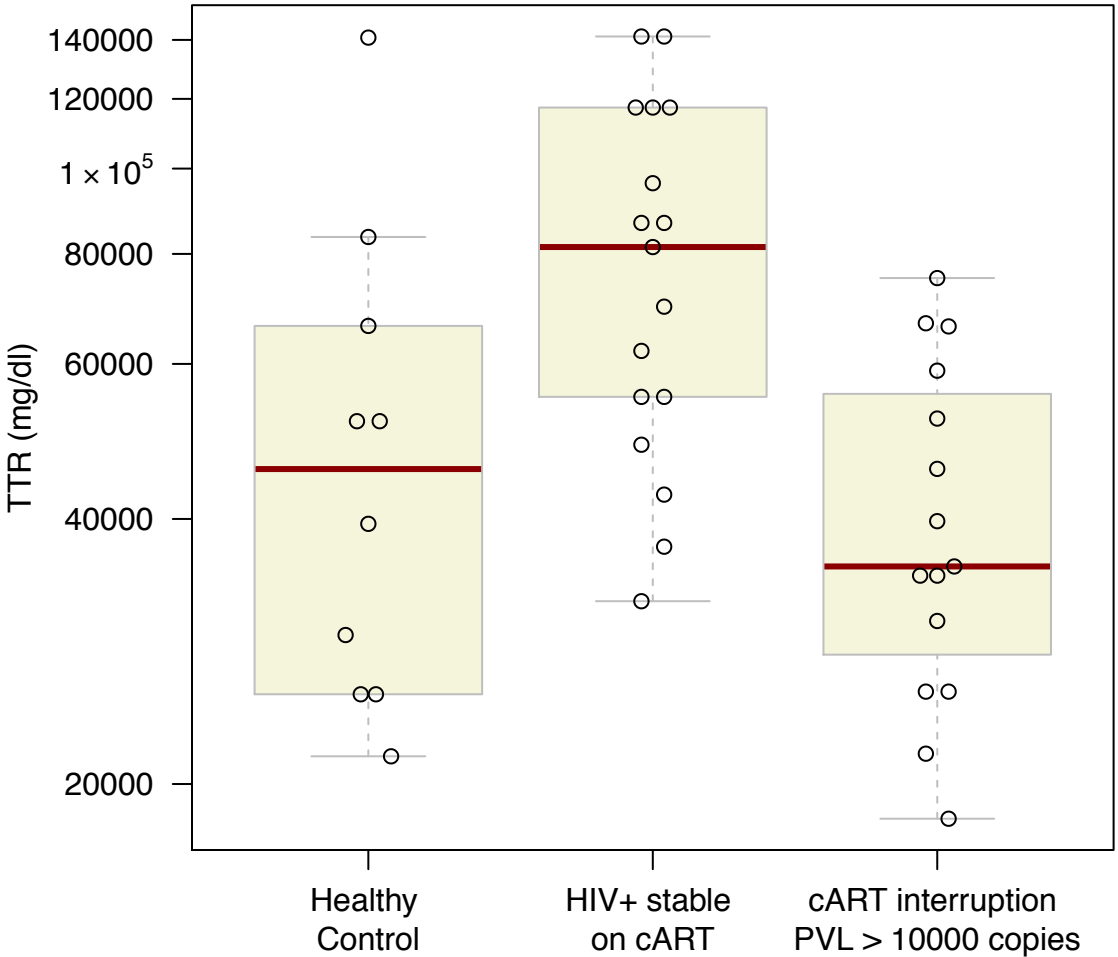

LLOQ: 4 mg/dl

# Trefoil Factor 3 (TFF3)

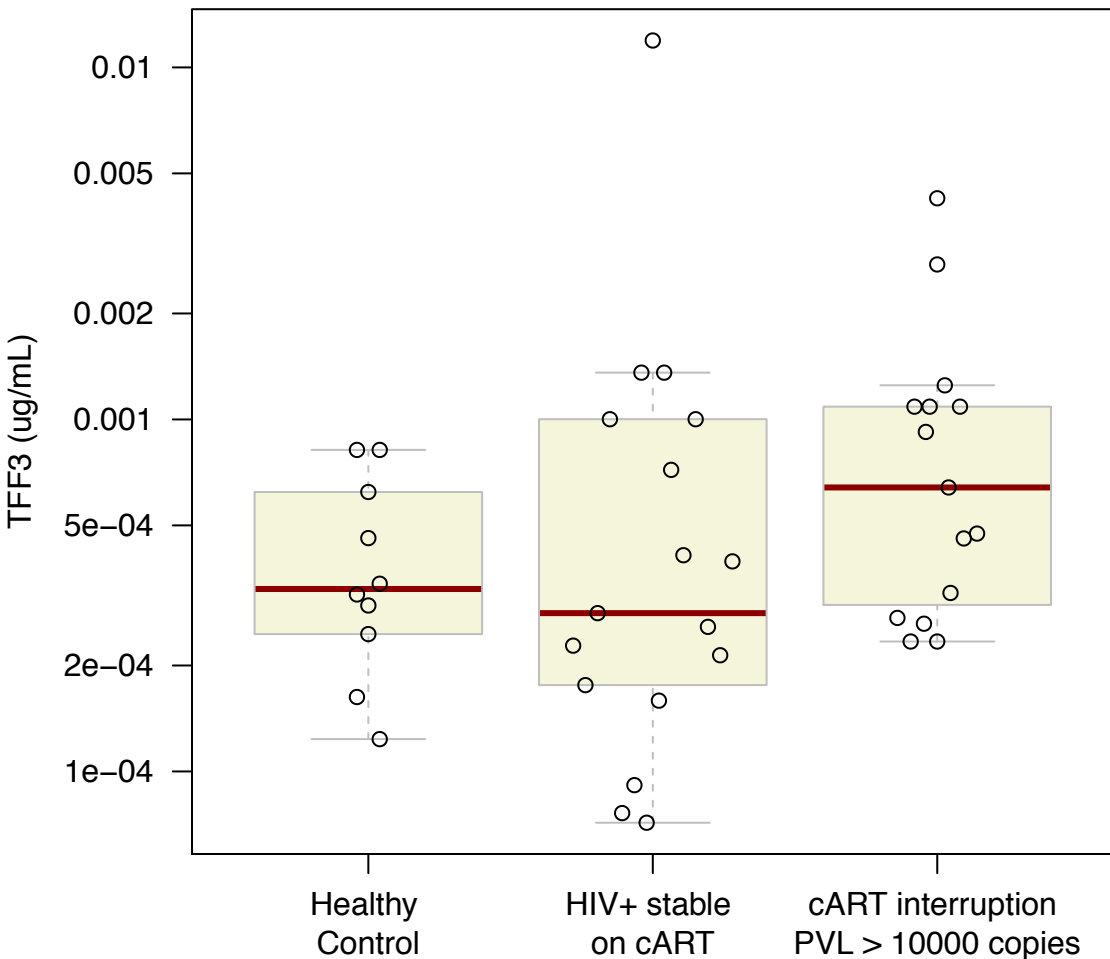

LLOQ: 0.0052 ug/mL

# Tumor Necrosis Factor Receptor I (TNF RI)

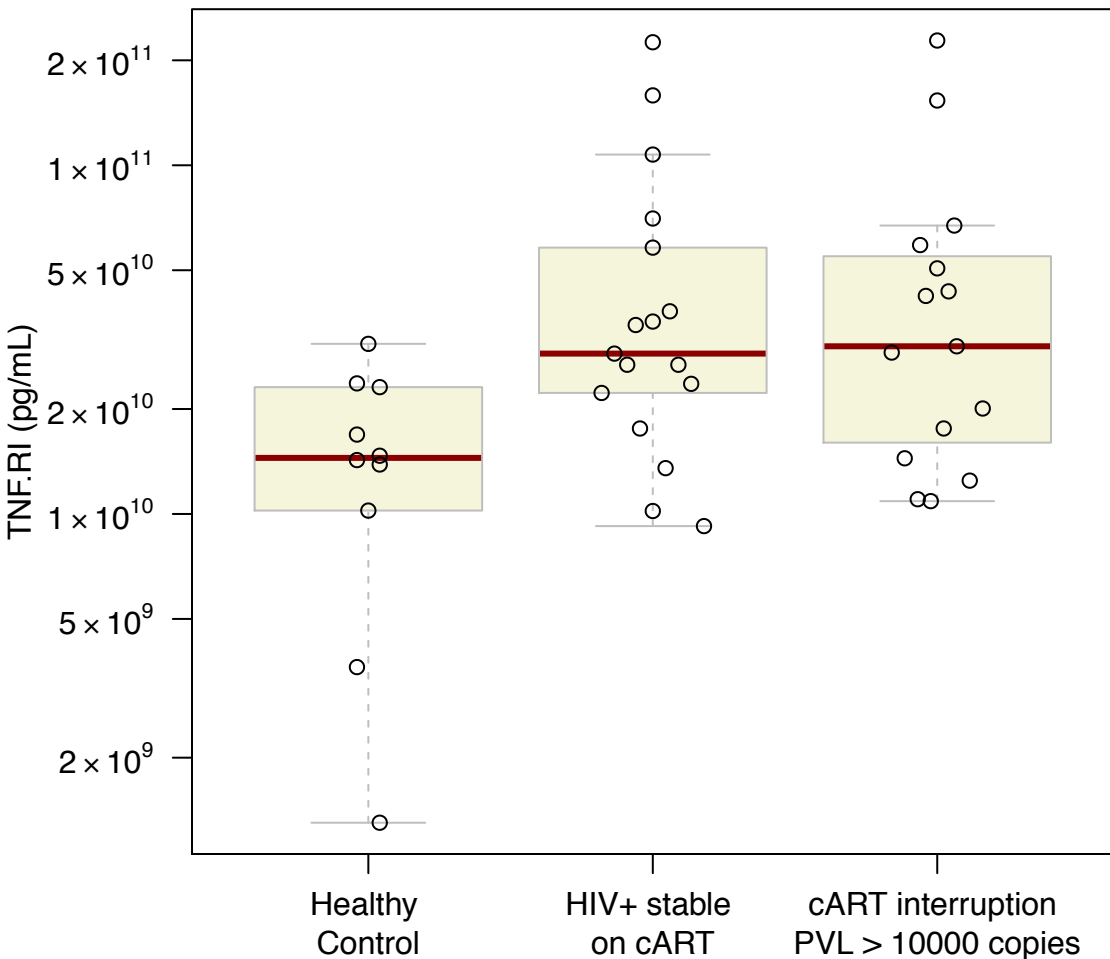

LLOQ: 36 pg/mL



# Tumor necrosis factor receptor 2 (TNFR2)

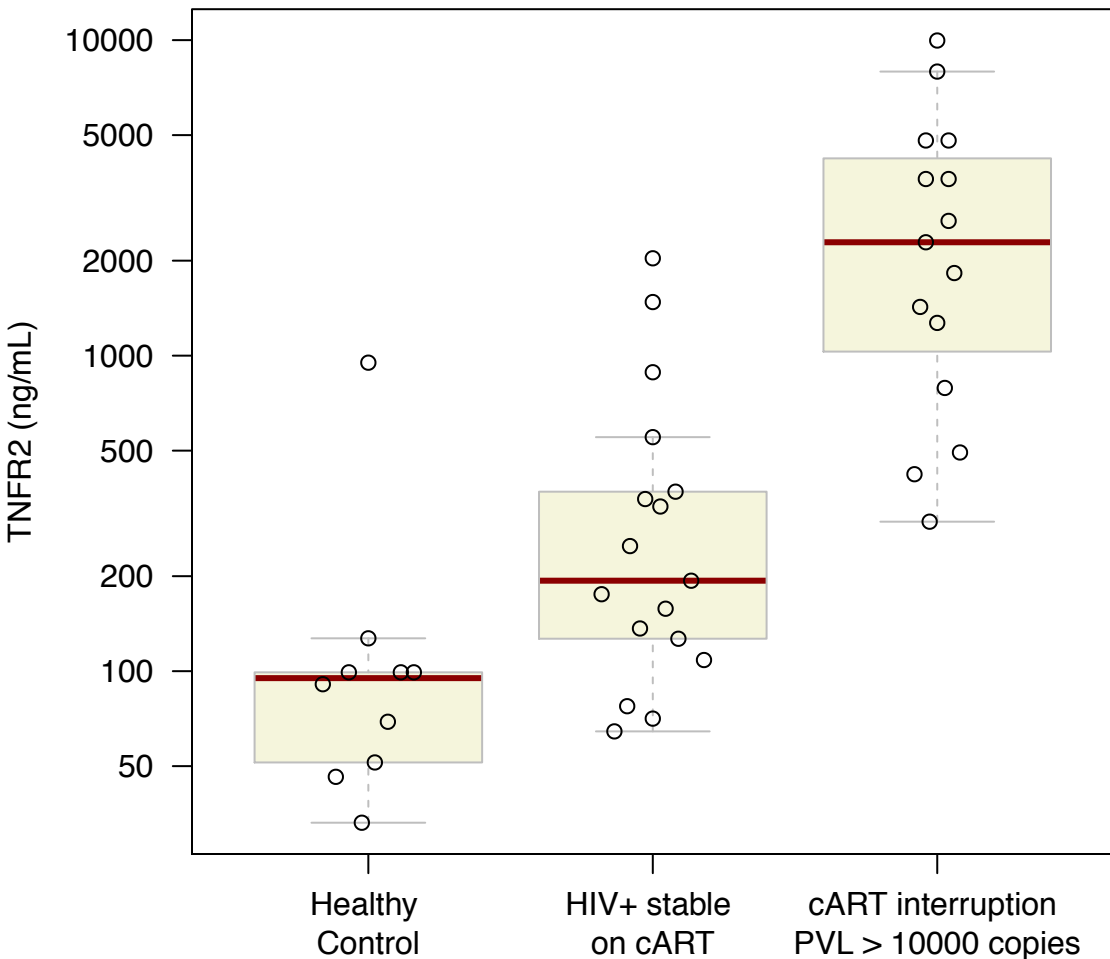

LLOQ: 0.86 ng/mL

# Tyrosine kinase with Ig and EGF homology domains 2

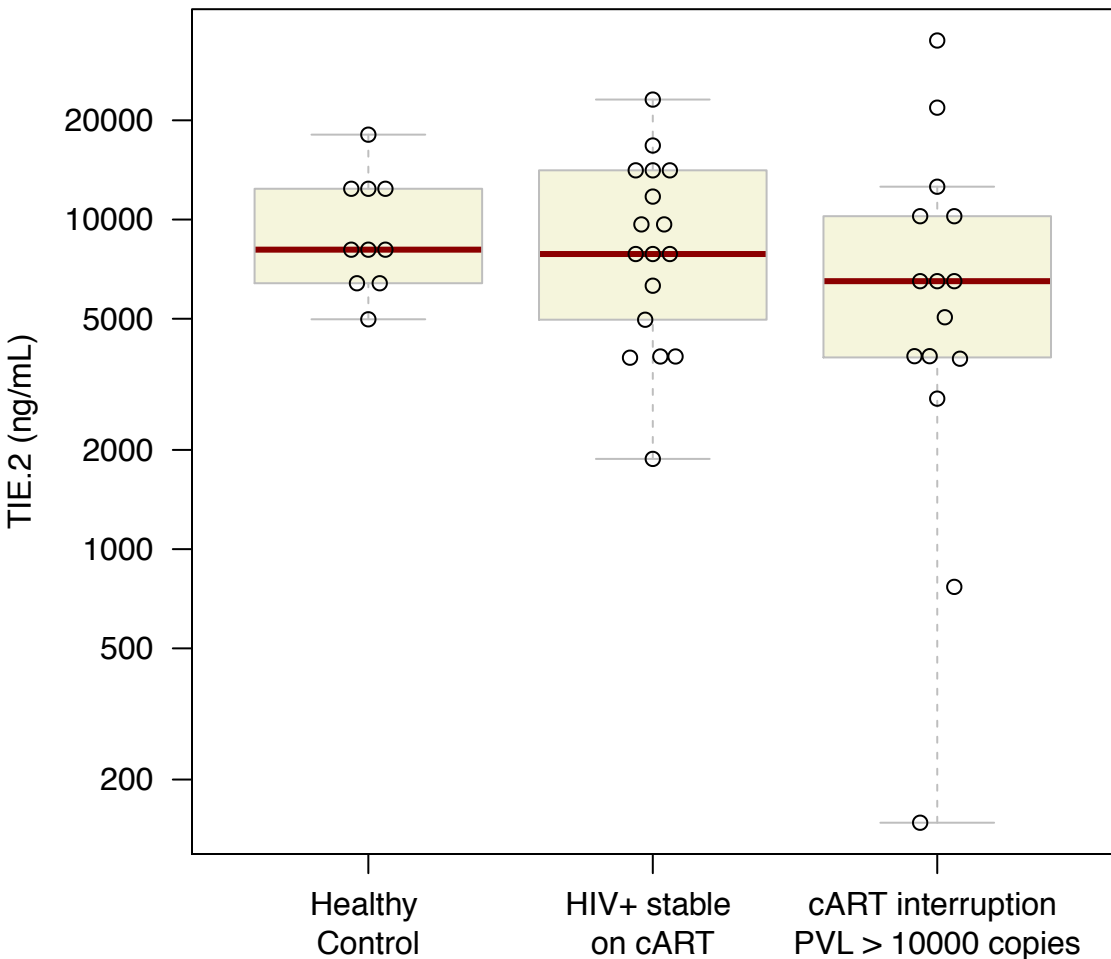

LLOQ: 0.18 ng/mL

# Urokinase-type Plasminogen Activator (uPA)

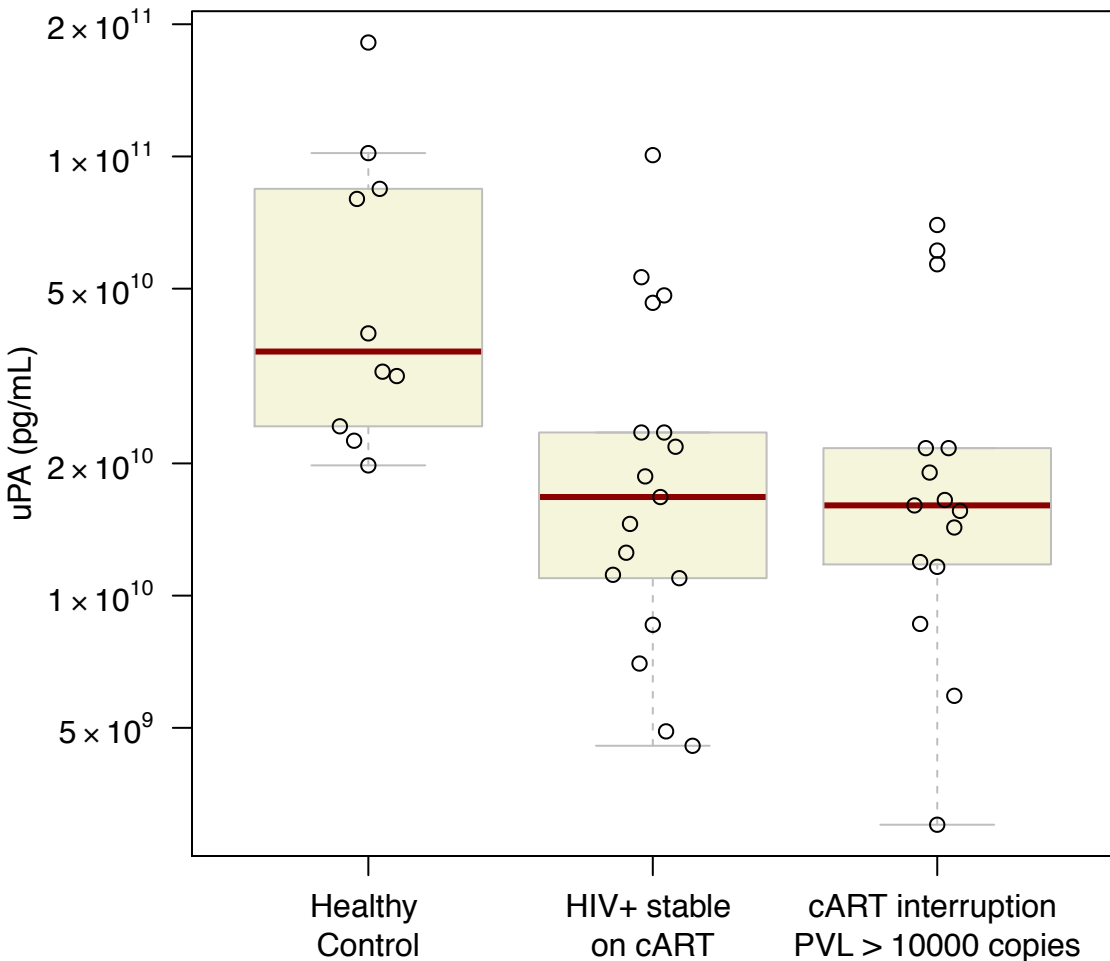

LLOQ: 113 pg/mL

# Urokinase-type plasminogen activator receptor (uPAR)

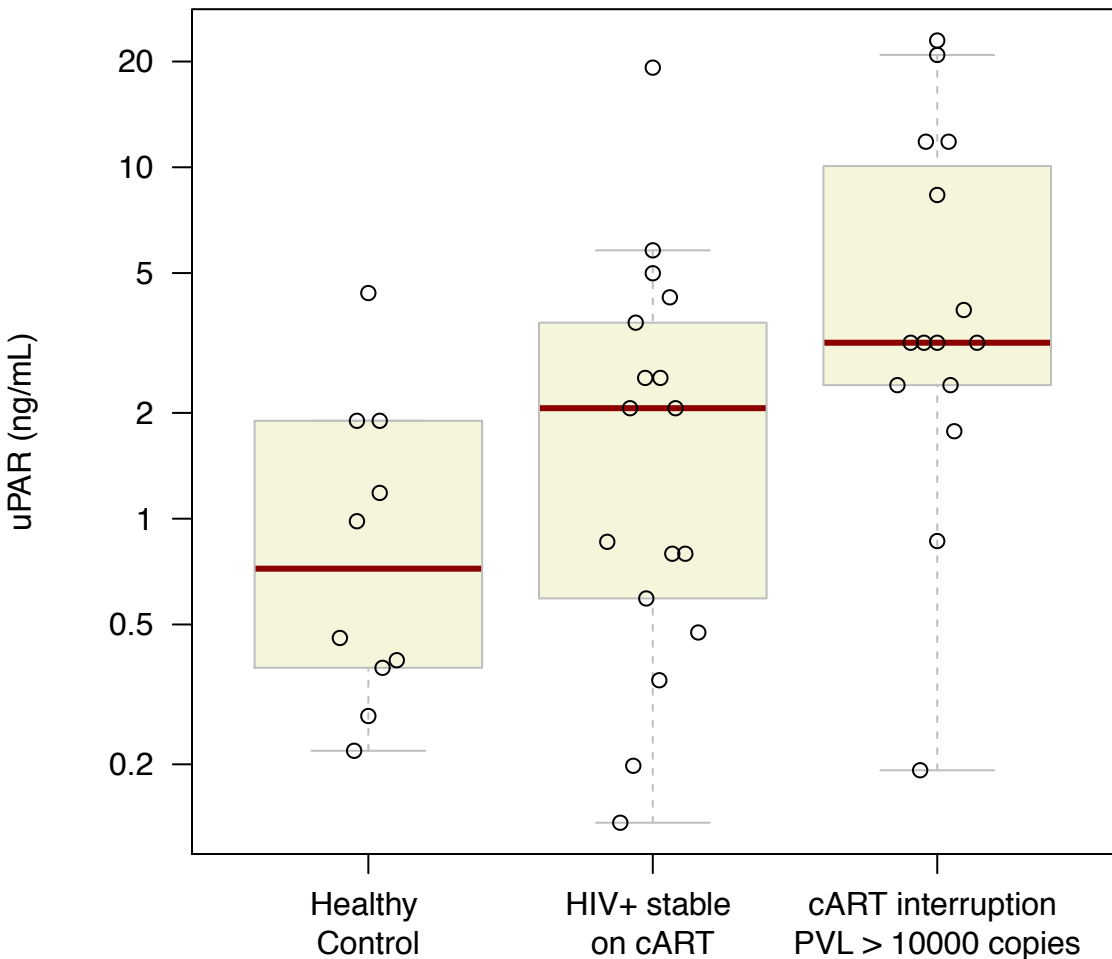

# Vascular Cell Adhesion Molecule-1 (VCAM-1)

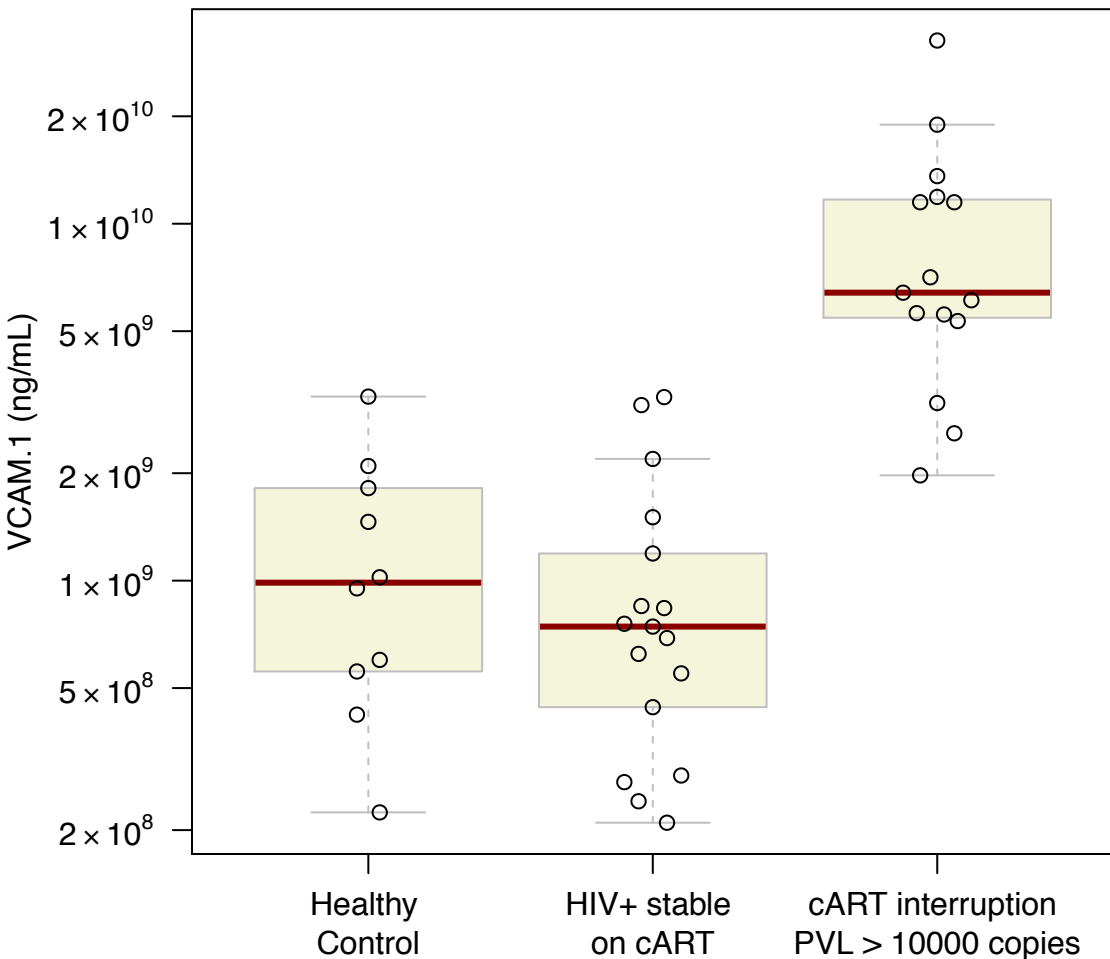

# Vascular Endothelial Growth Factor (VEGF)

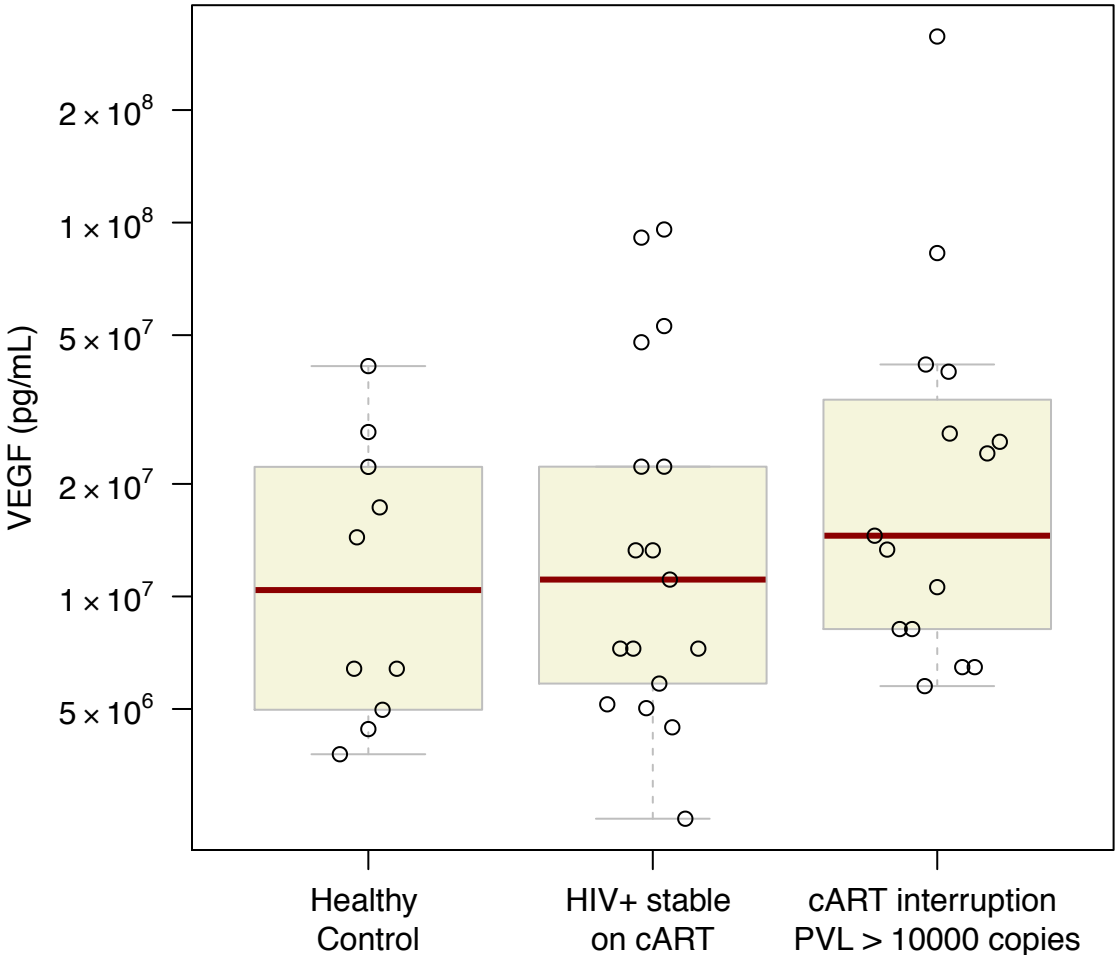

# Vascular Endothelial Growth Factor C (VEGF-C)

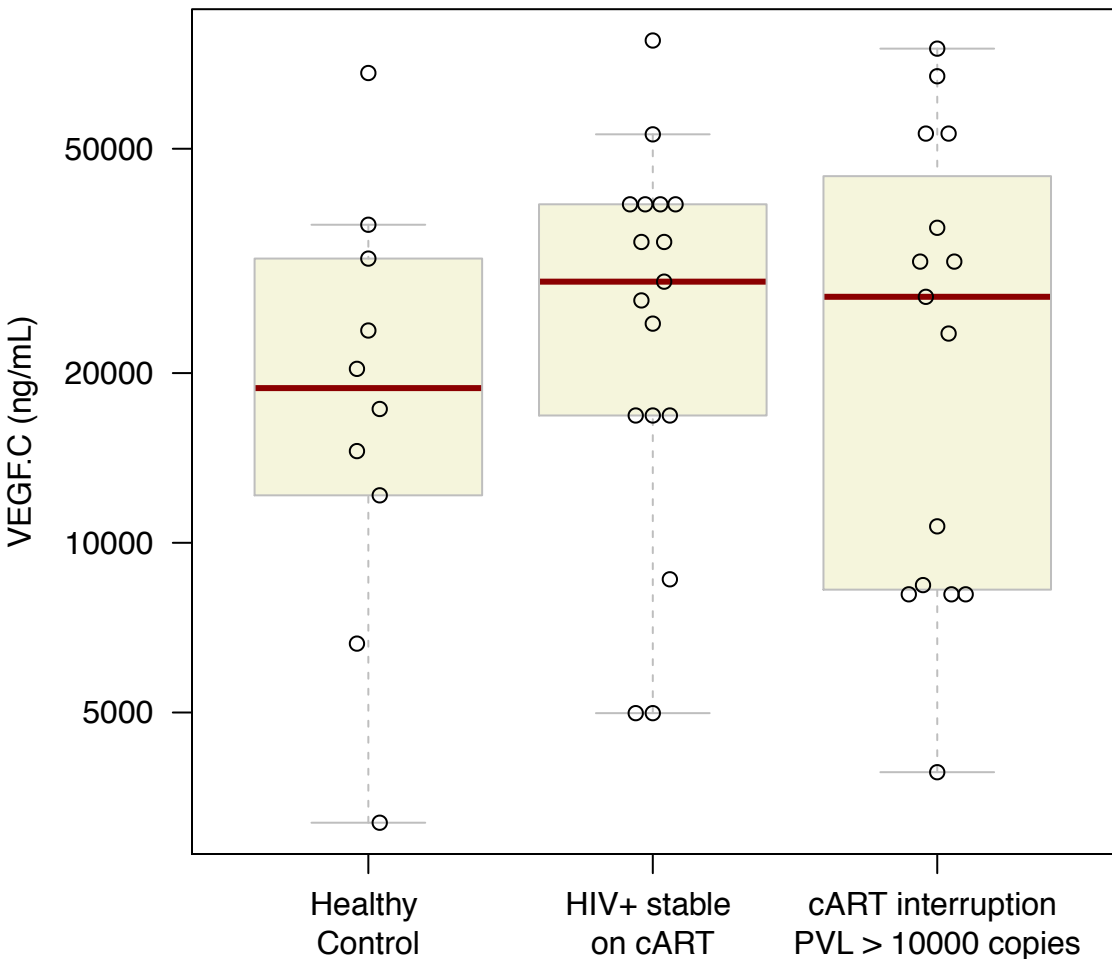

# Vascular endothelial growth factor D (VEGF-D)

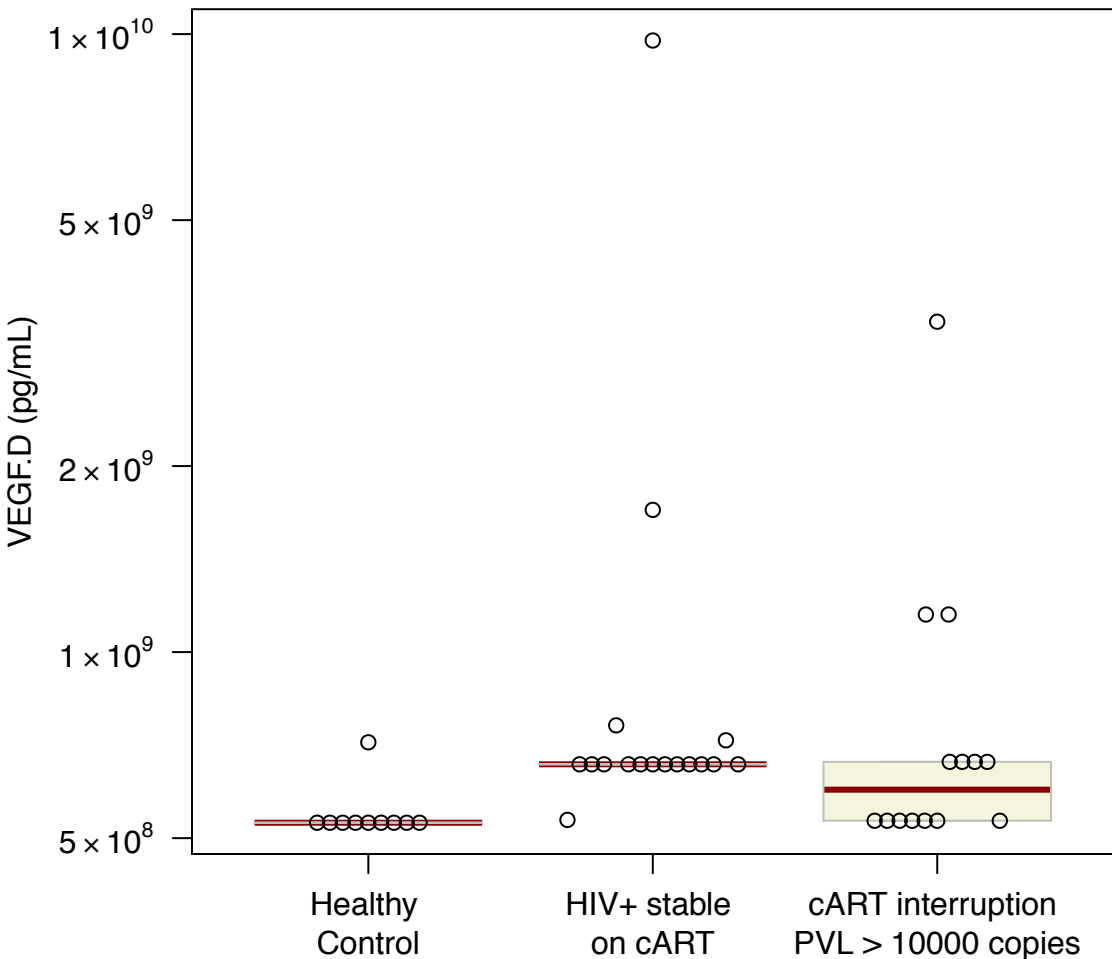



# Vascular Endothelial Growth Factor Receptor 2 (VEGFR.2)

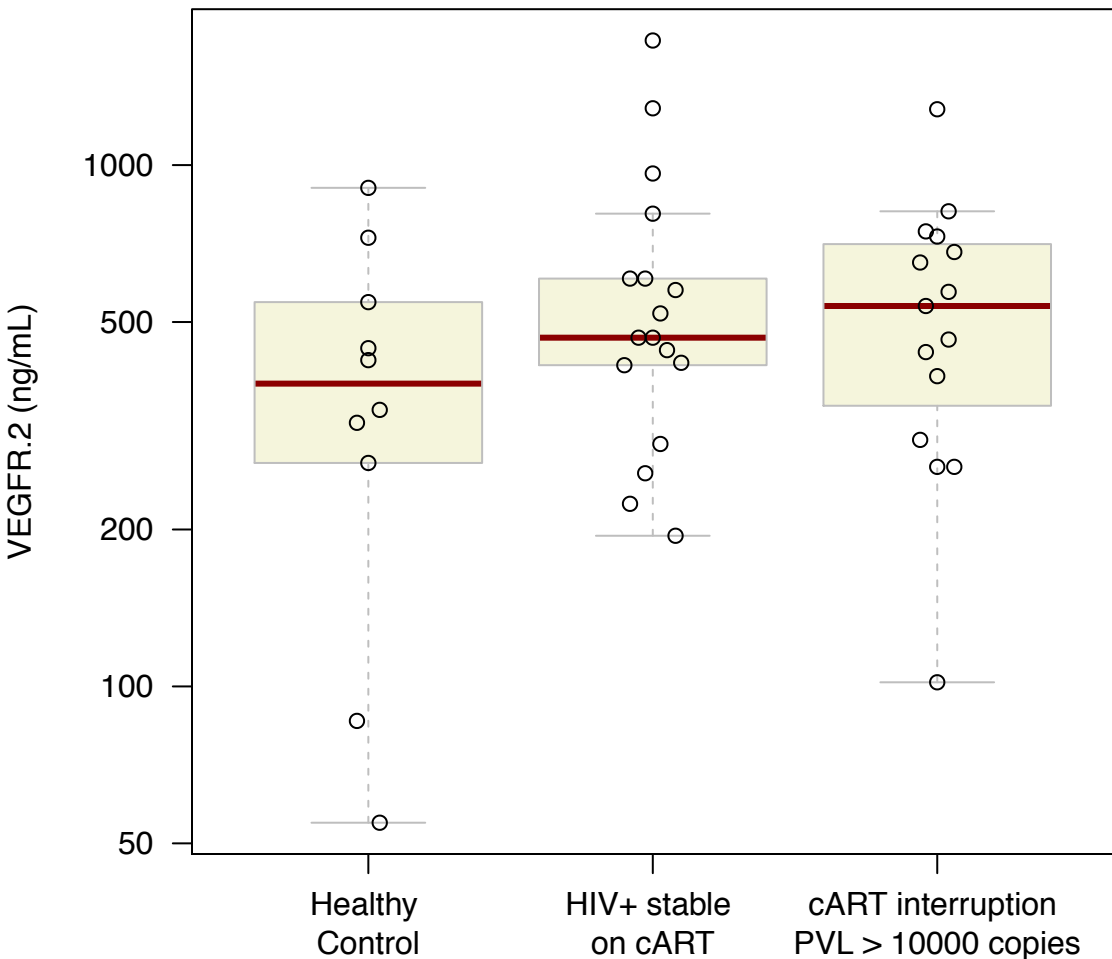

LLOQ: 0.61 ng/mL

# Vascular endothelial growth factor receptor 3 (VEGFR3)

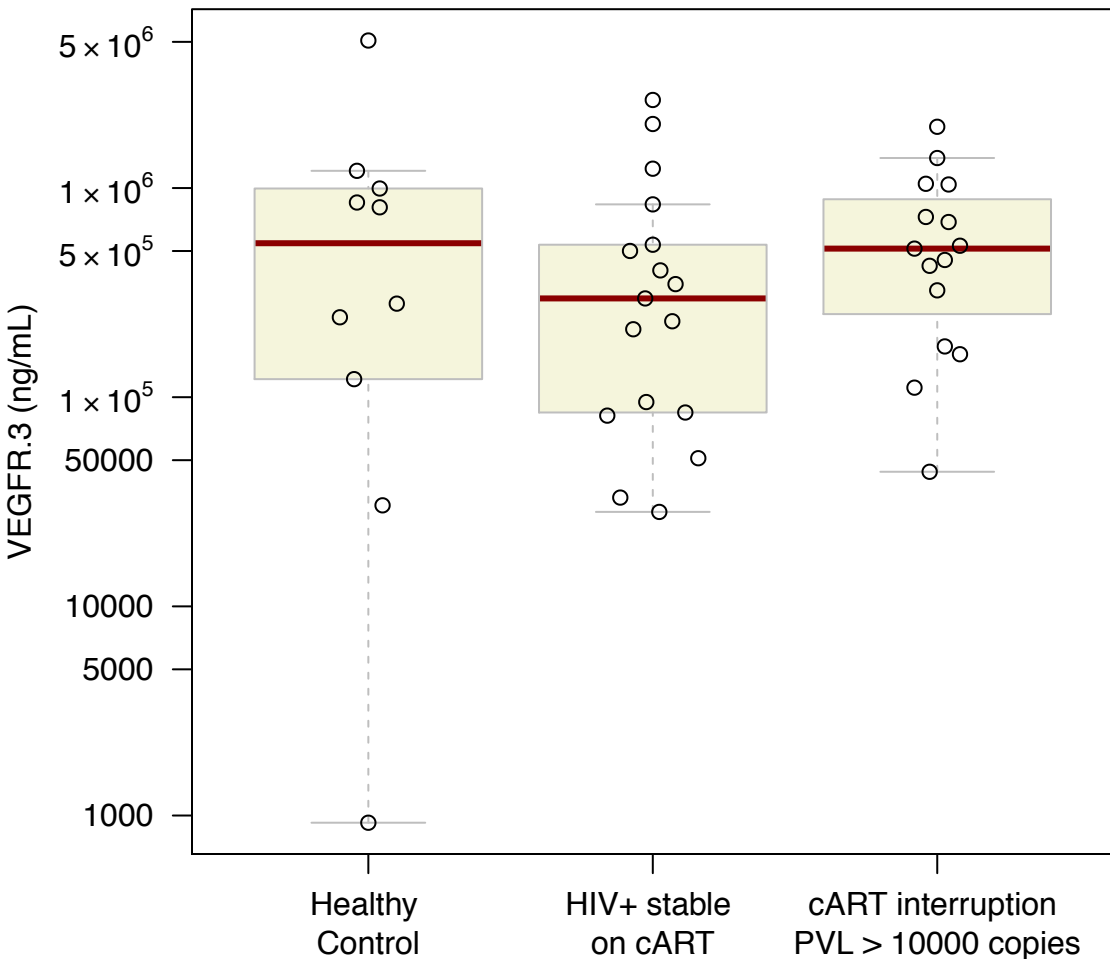

LLOQ: 5.4 ng/mL

# Vitamin D-Binding Protein (VDBP)

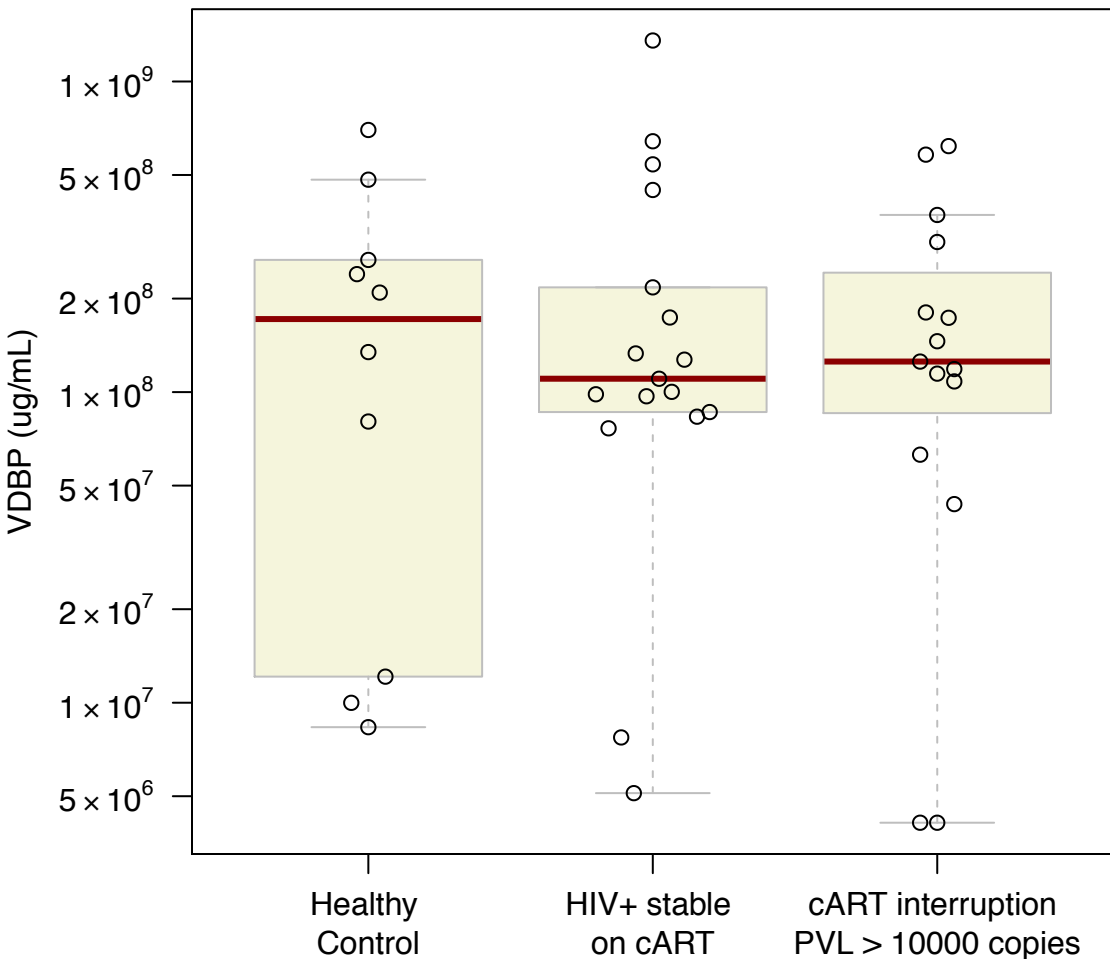

LLOQ: 5.6 ug/mL

# Vitamin K-Dependent Protein S (VKDPS)

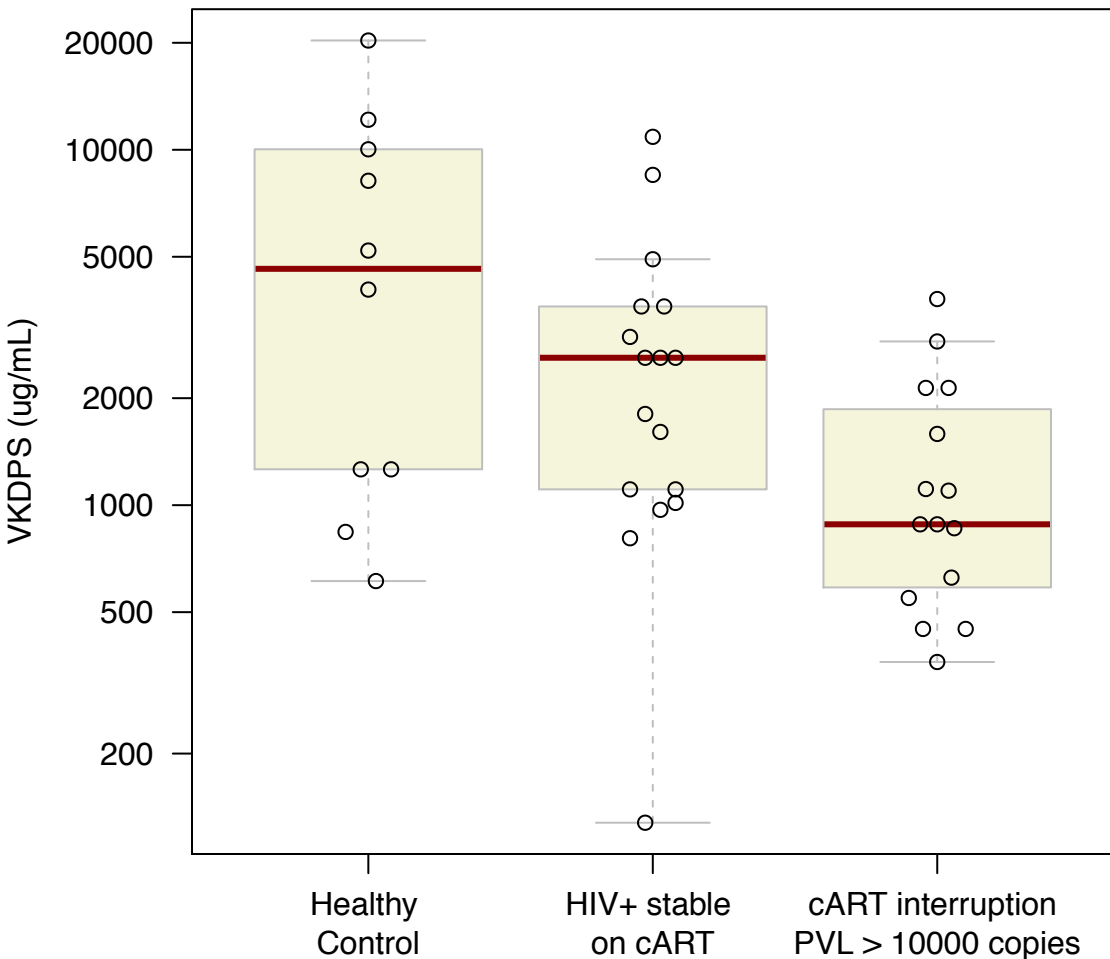

# Vitronectin

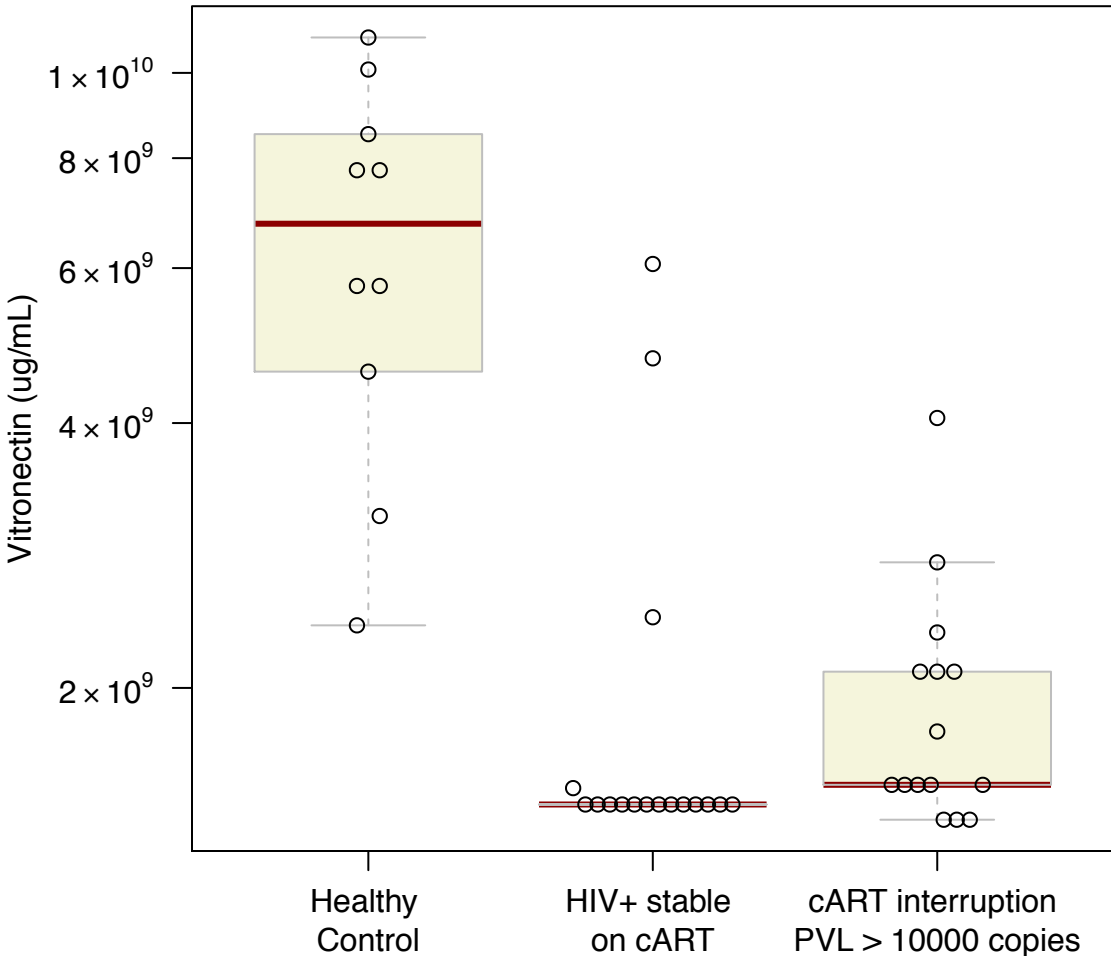

LLOQ: 583 ug/mL

# von Willebrand Factor (vWF)

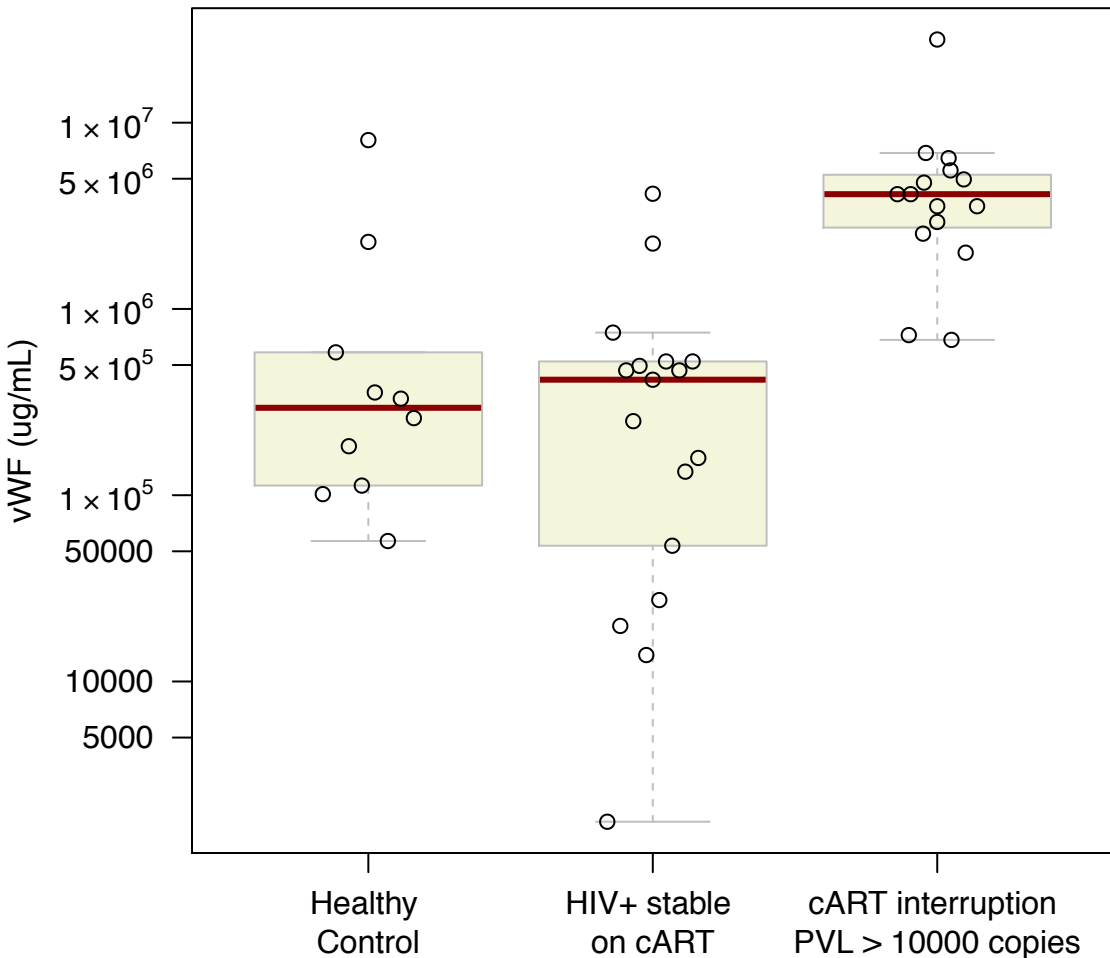

LLOQ: 11 ug/mL

# YKL-40

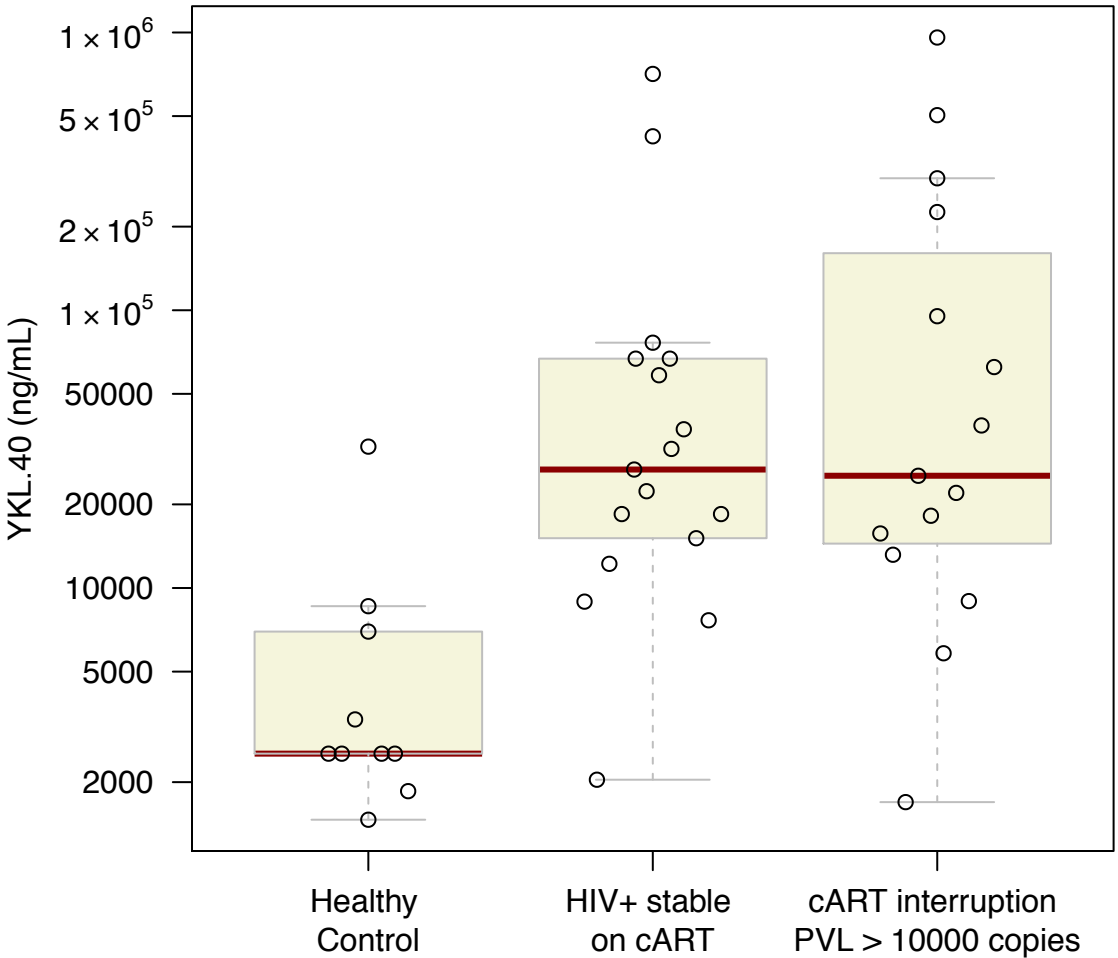

LLOQ: 3.7 ng/mL
